# Supplementary material for: Repurposing Peptidomimetic Drugs as Potential Inhibitors of Novel SARS-CoV-2 Main Protease Using Network Theory: A Protein-Ligand Binding Site Similarity Approach
Source: Research Square preprint supplement (doi:10.21203/rs.3.rs-1353780/v1), 2022-03-03
Supplement: Supplementary file 1 [file 06df083f9ff3de630a969a44.xlsx]

## Sheet: Protein Dataset
		Protein Dataset Used in Development of Protein-Ligand binding site Similarity Network
PDB ID	Protein/Enzyme	Organism scientific	Exp Method	Resolution	Lig_ID
5mif	CARBOXYL ESTERASE 2	TUBER MELANOSPORUM MEL28	X-RAY	2.14	TRT
3n6f	'NITRIC OXIDE SYNTHASE	BOS TAURUS	X-RAY	2.18	XFJ
1yum	'PROBABLE NICOTINATE-NUCLEOTIDE ADENYLYLTRANSFERASE	PSEUDOMONAS AERUGINOSA	X-RAY	1.7	NCN
5ldg	(-)-ISOPIPERITENONE REDUCTASE	MENTHA PIPERITA	X-RAY	1.3	IT9
1n20	(+)-BORNYL DIPHOSPHATE SYNTHASE	SALVIA OFFICINALIS	X-RAY	2.3	3AG
3g4f	(+)-DELTA-CADINENE SYNTHASE ISOZYME XC1	GOSSYPIUM ARBOREUM	X-RAY	2.65	FPF
5uv2	(+)-LIMONENE SYNTHASE	CITRUS SINENSIS	X-RAY	2.2	LA6
5hxq	(2Z,6Z)-FARNESYL DIPHOSPHATE SYNTHASE, CHLOROPLASTIC	SOLANUM HABROCHAITES	X-RAY	1.95	DST
5kag	(3,5-DIHYDROXYPHENYL)ACETYL-COA 1,2-DIOXYGENASE	STREPTOMYCES TOYOCAENSIS	X-RAY	2.46	YE1
2ipf	(3(17)ALPHA-HYDROXYSTEROID DEHYDROGENASE)	MUS MUSCULUS	X-RAY	1.85	NAP
2ipfa	(3(17)ALPHA-HYDROXYSTEROID DEHYDROGENASE)	MUS MUSCULUS	X-RAY	1.85	FFA
4rlj	(3R)-HYDROXYACYL-ACP DEHYDRATASE SUBUNIT HADA	MYCOBACTERIUM TUBERCULOSIS H37RV	X-RAY	1.75	P6G
3ed0	(3R)-HYDROXYMYRISTOYL-ACYL CARRIER PROTEIN	HELICOBACTER PYLORI	X-RAY	2.3	EMO
4oj8	(5R)-CARBAPENEM-3-CARBOXYLATE SYNTHASE	PECTOBACTERIUM CAROTOVORUM SUBSP. CAROTOVORUM	X-RAY	2.1	2TQ
5lfa	(6-4) PHOTOLYASE	AGROBACTERIUM FABRUM (STRAIN C58 / ATCC 33970)	X-RAY	2.5	DLZ
5cvv	(ISO)EUGENOL O-METHYLTRANSFERASE	CLARKIA BREWERI	X-RAY	1.73	N7I
2z1k	(NEO)PULLULANASE	THERMUS THERMOPHILUS	X-RAY	2.3	GLC
5gzy	(R)-2-HALOACID DEHALOGENASE	PSEUDOMONAS PUTIDA	X-RAY	2.18	2OP
3wwh	(R)-AMINE TRANSAMINASE	ARTHROBACTER SP. KNK168	X-RAY	1.65	PLP
6d0o	(R)-PHENOXYPROPIONATE/ALPHA-KETOGLUTARATE-DIOXYGENASE	SPHINGOBIUM HERBICIDOVORANS (STRAIN ATCC 700291	X-RAY	2.3	AKG
3wnq	(R)-SPECIFIC CARBONYL REDUCTASE	CANDIDA PARAPSILOSIS	X-RAY	2.95	HXT
2ewm	(S)-1-PHENYLETHANOL DEHYDROGENASE	AZOARCUS	X-RAY	2.4	NAD
2no5	(S)-2-HALOACID DEHALOGENASE IVA	BURKHOLDERIA CEPACIA	X-RAY	2.6	CNR
5u5d	(S)-2-HYDROXYPROPYLPHOSPHONIC ACID EPOXIDASE	PSEUDOMONAS SYRINGAE	X-RAY	2.49	TB6
2f6u	(S)-3-O-GERANYLGERANYLGLYCERYL PHOSPHATE	ARCHAEOGLOBUS FULGIDUS	X-RAY	1.55	CIT
1yb6	(S)-ACETONE-CYANOHYDRIN LYASE	HEVEA BRASILIENSIS	X-RAY	1.54	MNN
1eb8	(S)-ACETONE-CYANOHYDRIN LYASE	MANIHOT ESCULENTA	X-RAY	2.1	MPD
3wwo	(S)-HYDROXYNITRILE LYASE	BALIOSPERMUM MONTANUM	X-RAY	2.55	MPD
4oqy	(S)-IMINE REDUCTASE	STREPTOMYCES SP. GF3546	X-RAY	1.9	NDP
6bfg	(S)-MANDELATE DEHYDROGENASE	PSEUDOMONAS PUTIDA	X-RAY	2.2	GOL
2a7p	(S)-MANDELATE DEHYDROGENASE	PSEUDOMONAS PUTIDA, SPINACIA OLERACEA	X-RAY	2.2	3IL
5ice	(S)-NORCOCLAURINE 6-O-METHYLTRANSFERASE	THALICTRUM FLAVUM SUBSP. GLAUCUM	X-RAY	1.6	2H4
1m2d	[2FE-2S] FERREDOXIN	AQUIFEX AEOLICUS	X-RAY	1.05	FES
1fxa	[2FE-2S] FERREDOXIN	NOSTOC SP.	X-RAY	2.5	FES
3ah7	[2FE-2S]FERREDOXIN	PSEUDOMONAS PUTIDA	X-RAY	1.9	FES
1gkz	[3-METHYL-2-OXOBUTANOATE DEHYDROGENASE	RATTUS NORVEGICUS	X-RAY	2.2	ADP
40	[3-METHYL-2-OXOBUTANOATE DEHYDROGENASE [LIPOAMIDE]] KINASE,	RATTUS NORVEGICUS	X-RAY	1.97	0F1
4e01a	[3-METHYL-2-OXOBUTANOATE DEHYDROGENASE [LIPOAMIDE]] KINASE,	RATTUS NORVEGICUS	X-RAY	1.97	ANP
3ia9	[D25N]HIV-1 PROTEASE	Human Immunodeficiency Virus Type 1	X-RAY	1.3	2NC
5few	[FEFE] HYDROGENASE MATURASE SUBUNIT HYDE	THERMOTOGA MARITIMA	X-RAY	1.17	5X8
1frf	[NI-FE] HYDROGENASE	DESULFOVIBRIO FRUCTOSOVORANS	X-RAY	2.7	F3S
5xvb	[NIFE]-HYDROGENASE 2 SMALL SUBUNIT	CITROBACTER SP. S-77	X-RAY	1.84	F3S
6g28	[PROTEIN ADP-RIBOSYLARGININE] HYDROLASE	HOMO SAPIENS	X-RAY	1.23	AR6
5j71	[PYRUVATE DEHYDROGENASE (ACETYL-TRANSFERRING)] KINASE	HOMO SAPIENS	X-RAY	1.65	P35
2zkj	[PYRUVATE DEHYDROGENASE [LIPOAMIDE]] KINASE	HOMO SAPIENS	X-RAY	2	ADP
2q8g	[PYRUVATE DEHYDROGENASE [LIPOAMIDE]] KINASE ISOZYME 1	HOMO SAPIENS	X-RAY	1.9	AZX
4mpc	[PYRUVATE DEHYDROGENASE [LIPOAMIDE]] KINASE ISOZYME 2	HOMO SAPIENS	X-RAY	1.7	PV2
1y8o	[PYRUVATE DEHYDROGENASE [LIPOAMIDE]] KINASE ISOZYME 3	HOMO SAPIENS	X-RAY	2.48	ADP
3d2r	[PYRUVATE DEHYDROGENASE [LIPOAMIDE]] KINASE ISOZYME 4	HOMO SAPIENS	X-RAY	2.03	ADP
4wd0	1-(5-PHOSPHORIBOSYL)-5-[(5-PHOSPHORIBOSYLAMINO)	ARTHROBACTER AURESCENS	X-RAY	1.5	TRS
5abt	1-(5-PHOSPHORIBOSYL)-5-[(5-PHOSPHORIBOSYLAMINO)	SALMONELLA ENTERICA	X-RAY	1.65	GUO
5ab3	1-(5-PHOSPHORIBOSYL)-5-[(5-PHOSPHORIBOSYLAMINO)	SALMONELLA ENTERICA SUBSP. ENTERICA SEROVAR	X-RAY	1.8	2ER
2cff	1-(5-PHOSPHORIBOSYL)-5-[(5-PHOSPHORIBOSYLAMINO)	THERMOTOGA MARITIMA	X-RAY	2.5	MPD
5kym	1-ACYL-SN-GLYCEROL-3-PHOSPHATE ACYLTRANSFERASE	THERMOTOGA MARITIMA (STRAIN ATCC 43589 / MSB8 /	X-RAY	2.8	DD9
1tzj	1-AMINOCYCLOPROPANE-1-CARBOXYLATE DEAMINASE	PSEUDOMONAS SP.	X-RAY	1.99	A3B
1j0a	1-AMINOCYCLOPROPANE-1-CARBOXYLATE DEAMINASE	PYROCOCCUS HORIKOSHII	X-RAY	2.5	SO4
1f2d	1-AMINOCYCLOPROPANE-1-CARBOXYLATE DEAMINASE	WILLIOPSIS SATURNUS	X-RAY	2	SO4
1wa6	1-AMINOCYCLOPROPANE-1-CARBOXYLATE OXIDASE 1	PETUNIA HYBRIDA	X-RAY	2.55	FE2
5gj9	1-AMINOCYCLOPROPANE-1-CARBOXYLATE OXIDASE 2	ARABIDOPSIS THALIANA	X-RAY	2.1	VGL
3piu	1-AMINOCYCLOPROPANE-1-CARBOXYLATE SYNTHASE	MALUS DOMESTICA	X-RAY	1.35	PLR
1m7y	1-AMINOCYCLOPROPANE-1-CARBOXYLATE SYNTHASE	MALUS X DOMESTICA	X-RAY	1.6	PPG
1iay	1-AMINOCYCLOPROPANE-1-CARBOXYLATE SYNTHASE 2	SOLANUM LYCOPERSICUM	X-RAY	2.7	AVG
5k2j	1-CYS PEROXIREDOXIN	VIBRIO VULNIFICUS MO6-24/O	X-RAY	1.91	PEO
1q0q	1-DEOXY-D-XYLULOSE 5-PHOSPHATE REDUCTOISOMERASE	ESCHERICHIA COLI	X-RAY	1.9	DXP
4zqf	1-DEOXY-D-XYLULOSE 5-PHOSPHATE REDUCTOISOMERASE	MORAXELLA CATARRHALIS	X-RAY	2.2	FOM
4a03	1-DEOXY-D-XYLULOSE 5-PHOSPHATE REDUCTOISOMERASE	MYCOBACTERIUM TUBERCULOSIS	X-RAY	1.65	F98
3au9	1-DEOXY-D-XYLULOSE 5-PHOSPHATE REDUCTOISOMERASE	PLASMODIUM FALCIPARUM	X-RAY	1.9	FOM
3a06	1-DEOXY-D-XYLULOSE 5-PHOSPHATE REDUCTOISOMERASE	THERMOTOGA MARITIMA	X-RAY	2	FOM
5krv	1-DEOXY-D-XYLULOSE 5-PHOSPHATE REDUCTOISOMERASE	VIBRIO VULNIFICUS (STRAIN CMCP6)	X-RAY	2.3	ARG
5dul	1-DEOXY-D-XYLULOSE 5-PHOSPHATE REDUCTOISOMERASE	YERSINIA PESTIS	X-RAY	2.6	NDP
5jaz	1-DEOXY-D-XYLULOSE 5-PHOSPHATE REDUCTOISOMERASE,	PLASMODIUM FALCIPARUM (ISOLATE 3D7)	X-RAY	1.4	LC5
2o1x	1-DEOXY-D-XYLULOSE-5-PHOSPHATE SYNTHASE	DEINOCOCCUS RADIODURANS	X-RAY	2.9	TDP
2o1s	1-DEOXY-D-XYLULOSE-5-PHOSPHATE SYNTHASE	ESCHERICHIA COLI	X-RAY	2.4	TDP
2rdq	1-DEOXYPENTALENIC ACID 11-BETA HYDROXYLASE FE(II)/ALPHA-	STREPTOMYCES AVERMITILIS	X-RAY	1.31	AKG
4cfs	1-H-3-HYDROXY-4-OXOQUINALDINE 2,4-DIOXYGENASE	ARTHROBACTER NITROGUAJACOLICUS	X-RAY	1.94	HQD
3ea2	1-PHOSPHATIDYLINOSITOL PHOSPHODIESTERASE	BACILLUS THURINGIENSIS	X-RAY	1.95	INS
4i9j	1-PHOSPHATIDYLINOSITOL PHOSPHODIESTERASE	STAPHYLOCOCCUS AUREUS SUBSP. AUREUS	X-RAY	1.85	XP5
4jdc	1-PYRROLINE-5-CARBOXYLATE DEHYDROGENASE	MYCOBACTERIUM TUBERCULOSIS	X-RAY	1.6	NAD
2bjk	1-PYRROLINE-5-CARBOXYLATE DEHYDROGENASE	THERMUS THERMOPHILUS	X-RAY	1.4	FLC
5i8t	1,2-DIHYDROXY-3-KETO-5-METHYLTHIOPENTENE DIOXYGENASE	MUS MUSCULUS	X-RAY	1.75	LAC
2ehz	1,2-DIHYDROXYNAPHTHALENE DIOXYGENASE	PSEUDOMONAS SP.	X-RAY	1.35	MCT
4ii4	1,2-PHENYLACETYL-COA EPOXIDASE, SUBUNIT A	ESCHERICHIA COLI	X-RAY	2.8	BYC
3k9v	1,25-DIHYDROXYVITAMIN D(3) 24-HYDROXYLASE,	RATTUS NORVEGICUS	X-RAY	2.5	CPS
5o9q	1,3-BETA-GLUCANOSYLTRANSFERASE GAS2	SACCHAROMYCES CEREVISIAE S288C	X-RAY	1.4	9PH
1k63	1,3,4,6-TETRACHLORO-1,4-CYCLOHEXADIENE HYDROLASE	SPHINGOMONAS PAUCIMOBILIS	X-RAY	1.8	BRP
1ja9	1,3,6,8-TETRAHYDROXYNAPHTHALENE REDUCTASE	MAGNAPORTHE GRISEA	X-RAY	1.5	PYQ
1jdc	1,4-ALPHA MALTOTETRAHYDROLASE	PSEUDOMONAS STUTZERI	X-RAY	1.9	GLC
1bg9	1,4-ALPHA-D-GLUCAN GLUCANOHYDROLASE	HORDEUM VULGARE	X-RAY	2.8	DAF
4lpc	1,4-ALPHA-GLUCAN BRANCHING ENZYME GLGB	ESCHERICHIA COLI	X-RAY	2.39	GLC
5e6z	1,4-ALPHA-GLUCAN BRANCHING ENZYME GLGB	ESCHERICHIA COLI O139:H28 (STRAIN E24377A /	X-RAY	1.88	BCD
5clt	1,4-ALPHA-GLUCAN-BRANCHING ENZYME	HOMO SAPIENS	X-RAY	2.79	ACR
3vu2	1,4-ALPHA-GLUCAN-BRANCHING ENZYME	ORYZA SATIVA JAPONICA GROUP	X-RAY	2.23	CEX
6cel	1,4-BETA-D-GLUCAN CELLOBIOHYDROLASE I	HYPOCREA JECORINA	X-RAY	1.7	BGC
1cel	1,4-BETA-D-GLUCAN CELLOBIOHYDROLASE I	TRICHODERMA REESEI	X-RAY	1.8	BGC
4doe	1,4-BETA-GLUCANASE	CALDICELLULOSIRUPTOR BESCII	X-RAY	1.56	CT3
2wwd	1,4-BETA-N-ACETYLMURAMIDASE	STREPTOCOCCUS PNEUMONIAE	X-RAY	2.25	MU2
4i42	1,4-DIHYDROXY-2-NAPHTHOYL-COA SYNTHASE	ESCHERICHIA COLI	X-RAY	1.85	1HA
3t8a	1,4-DIHYDROXY-2-NAPHTHOYL-COA SYNTHASE	MYCOBACTERIUM TUBERCULOSIS	X-RAY	2.25	S0N
4qii	1,4-DIHYDROXY-2-NAPHTHOYL-COA SYNTHASE	MYCOBACTERIUM TUBERCULOSIS H37RV	X-RAY	1.64	2NE
2glx	1,5-ANHYDRO-D-FRUCTOSE REDUCTASE	ENSIFER ADHAERENS	X-RAY	2.2	NDP
4koa	1,5-ANHYDRO-D-FRUCTOSE REDUCTASE	SINORHIZOBIUM MELILOTI	X-RAY	1.93	NDP
2y2b	1,6-ANHYDRO-N-ACETYLMURAMYL-L-ALANINE AMIDASE AMPD	CITROBACTER FREUNDII	X-RAY	1.9	MHI
1p3h	10 KDA CHAPERONIN	MYCOBACTERIUM TUBERCULOSIS	X-RAY	2.8	MPD
4tts	10-FORMYLTETRAHYDROFOLATE DEHYDROGENASE	DANIO RERIO	X-RAY	2	6DD
2cfi	10-FORMYLTETRAHYDROFOLATE DEHYDROGENASE	HOMO SAPIENS	X-RAY	1.85	ZZZ
2po1	10-MER POLY(A)	PYROCOCCUS ABYSSI	X-RAY	1.94	MPD
3g49	11-BETA-HYDROXYSTEROID DEHYDROGENASE 1	CAVIA PORCELLUS	X-RAY	2.5	3G4
3ey4	11-BETA-HYDROXYSTEROID DEHYDROGENASE 1	HOMO SAPIENS	X-RAY	3	352
3vf1	11R-LIPOXYGENASE	GERSEMIA FRUTICOSA	X-RAY	2.47	SUC
5wxu	11S GLOBULIN	WRIGHTIA TINCTORIA	X-RAY	1.7	IAC
5z54	12-EPI-HAPALINDOLE C/U SYNTHASE	FISCHERELLA AMBIGUA UTEX 1903	X-RAY	2.16	0HZ
5wpp	12-EPI-HAPALINDOLE C/U SYNTHASE	FISCHERELLA SP. ATCC 43239	X-RAY	1.7	PG4
5z53	12-EPI-HAPALINDOLE U SYNTHASE	FISCHERELLA SP. TAU	X-RAY	1.86	0HZ
2q3r	12-OXOPHYTODIENOATE REDUCTASE 1	ARABIDOPSIS THALIANA	X-RAY	2	FMN
2q3o	12-OXOPHYTODIENOATE REDUCTASE 3	ARABIDOPSIS THALIANA	X-RAY	2	FMN
1q45	12-OXOPHYTODIENOATE-10,11-REDUCTASE	ARABIDOPSIS THALIANA	X-RAY	2	FMN
1icp	12-OXOPHYTODIENOATE REDUCTASE 1	SOLANUM LYCOPERSICUM	X-RAY	1.9	2PE
1icpa	12-OXOPHYTODIENOATE REDUCTASE 1	SOLANUM LYCOPERSICUM	X-RAY	1.9	FMN
3hgs	12-OXOPHYTODIENOATE REDUCTASE 3	SOLANUM LYCOPERSICUM	X-RAY	2	PHB
4x8j	12F4 FAB LIGHT CHAIN	MUS MUSCULUS	X-RAY	2.35	2PE
1vyf	14 KDA FATTY ACID BINDING PROTEIN	SCHISTOSOMA MANSONI	X-RAY	1.85	OLA
5nwi	14-3-3 C-1 PROTEIN	ARABIDOPSIS THALIANA	X-RAY	2.35	SEP
6hep	14-3-3 PROTEIN BETA/ALPHA	HOMO SAPIENS	X-RAY	1.86	ETE
5wfu	14-3-3 PROTEIN BETA/ALPHA	MUS MUSCULUS	X-RAY	1.97	MLT
6gnk	14-3-3 PROTEIN BETA/ALPHA	PSEUDOMONAS AERUGINOSA	X-RAY	2.55	CNA
6gnn	14-3-3 PROTEIN BETA/ALPHA	PSEUDOMONAS AERUGINOSA PAO1	X-RAY	3.79	F4W
5f74	14-3-3 PROTEIN BETA/ALPHA	RATTUS NORVEGICUS	X-RAY	2.35	AMP
2br9	14-3-3 PROTEIN EPSILON	HOMO SAPIENS	X-RAY	1.75	P
2c63	14-3-3 PROTEIN ETA	HOMO SAPIENS	X-RAY	2.15	P
3iqu	14-3-3 PROTEIN SIGMA	HOMO SAPIENS	X-RAY	1.05	P
5oma	14-3-3 PROTEIN SIGMA,STEROIDOGENIC ACUTE REGULATORY	HOMO SAPIENS	X-RAY	3.9	UNK
5om0	14-3-3 PROTEIN SIGMA,ZINC FINGER PROTEIN GLI1	HOMO SAPIENS	X-RAY	3.2	TRS
2btp	14-3-3 PROTEIN TAU	HOMO SAPIENS	X-RAY	2.8	P
6bcr	14-3-3 PROTEIN THETA	HOMO SAPIENS	X-RAY	1.99	1PE
1qja	14-3-3 PROTEIN ZETA	HOMO SAPIENS	X-RAY	2	R
5exa	14-3-3 PROTEIN ZETA/DELTA	HOMO SAPIENS	X-RAY	1.95	5SO
4n7y	14-3-3 PROTEIN ZETA/DELTA	PSEUDOMONAS AERUGINOSA	X-RAY	2.16	2JN, MK8
1ib1	14-3-3 ZETA ISOFORM	OVIS ARIES	X-RAY	2.7	TPO, COT
5nwj	14-3-3-LIKE PROTEIN C	ARABIDOPSIS THALIANA	X-RAY	2.07	P
1o9d	14-3-3-LIKE PROTEIN C	NICOTIANA PLUMBAGINIFOLIA	X-RAY	2.3	P
3e6y	14-3-3-LIKE PROTEIN C	NICOTIANA TABACUM	X-RAY	2.5	CW1
4dx0	14-3-3-LIKE PROTEIN E	NICOTIANA PLUMBAGINIFOLIA	X-RAY	3.4	0MT
4uym	14-ALPHA STEROL DEMETHYLASE	ASPERGILLUS FUMIGATUS	X-RAY	2.55	VOR
6cr2	14-ALPHA STEROL DEMETHYLASE CYP51B	ASPERGILLUS FUMIGATUS	X-RAY	2.38	LFV
1l0y	14.3.D T CELL RECEPTOR BETA CHAIN	STREPTOCOCCUS PYOGENES	X-RAY	2.5	GOL
1oni	14.5 KDA TRANSLATIONAL INHIBITOR PROTEIN	HOMO SAPIENS	X-RAY	1.9	BEZ
1j30	144AA LONG HYPOTHETICAL RUBRERYTHRIN	SULFOLOBUS TOKODAII	X-RAY	1.7	FE, ZN
3gf2	146AA LONG HYPOTHETICAL TRANSCRIPTIONAL REGULATOR	SULFOLOBUS TOKODAII	X-RAY	1.8	SAL
1lox	15-LIPOXYGENASE	ORYCTOLAGUS CUNICULUS	X-RAY	2.4	RS7
3fp0	15-O-ACETYLTRANSFERASE	FUSARIUM SPOROTRICHIOIDES	X-RAY	1.9	FP0
3fp0a	15-O-ACETYLTRANSFERASE	FUSARIUM SPOROTRICHIOIDES	X-RAY	1.9	SWE
2x9o	15,16-DIHYDROBILIVERDIN-FERREDOXIN OXIDOREDUCTASE	SYNECHOCOCCUS SP.	X-RAY	1.55	BLA
4g32	15S-LIPOXYGENASE	PSEUDOMONAS AERUGINOSA	X-RAY	1.75	ZPE
2yzj	167AA LONG HYPOTHETICAL DUTPASE	SULFOLOBUS TOKODAII	X-RAY	1.66	DUD
5uz4	16S RIBOSOMAL RNA	ESCHERICHIA COLI	ELECTRON	5.8	GGM
5oom	16S RIBOSOMAL RNA	HOMO SAPIENS	ELECTRON	3.03	PNS
5no2	16S RIBOSOMAL RNA	ESCHERICHIA COLI (STRAIN K12)	ELECTRON	5.16	GNP
5jbh	16S RIBOSOMAL RNA	PYROCOCCUS ABYSSI GE5	ELECTRON	5.34	GNP
4b3m	16S RIBOSOMAL RNA	THERMUS THERMOPHILUS HB8	X-RAY	2.9	ON0
4ox9	16S RRNA	ESCHERICHIA COLI	X-RAY	3.8	SFG
2vqe	16S RRNA	THERMUS THERMOPHILUS	X-RAY	2.5	PAR
2vqea	16S RRNA	THERMUS THERMOPHILUS	X-RAY	2.5	TM2
5bw4	16S RRNA (ADENINE(1408)-N(1))-METHYLTRANSFERASE	CATENULISPORA ACIDIPHILA	X-RAY	2.1	SAM
6cn0	16S RRNA (GUANINE(1405)-N(7))-METHYLTRANSFERASE	PROTEUS MIRABILIS	X-RAY	2.95	CIT
3frh	16S RRNA METHYLASE	ESCHERICHIA COLI	X-RAY	1.2	SAH
3mq2	16S RRNA METHYLTRANSFERASE	STREPTOMYCES SP. DSM 40477	X-RAY	1.69	SAH
2f1l	16S RRNA PROCESSING PROTEIN	PSEUDOMONAS AERUGINOSA	X-RAY	2.46	GOL
1jtv	17 BETA-HYDROXYSTEROID DEHYDROGENASE TYPE 1	HOMO SAPIENS	X-RAY	1.54	TES
5o6x	17-BETA-HYDROXYSTEROID DEHYDROGENASE 14	HOMO SAPIENS	X-RAY	1.35	9MK
1zbq	17-BETA-HYDROXYSTEROID DEHYDROGENASE 4	HOMO SAPIENS	X-RAY		NAD
1yb1	17-BETA-HYDROXYSTEROID DEHYDROGENASE TYPE XI	HOMO SAPIENS	X-RAY	1.95	AOI
6b0s	1710 ANTIBODY, HEAVY CHAIN	PLASMODIUM FALCIPARUM	X-RAY	1.95	GOL
6b0w	1710 ANTIBODY, LIGHT CHAIN	HOMO SAPIENS	X-RAY	1.9	GOL
1woz	177AA LONG CONSERVED HYPOTHETICAL PROTEIN (ST1454)	SULFOLOBUS TOKODAII	X-RAY	1.94	POG
2cqz	177AA LONG HYPOTHETICAL PROTEIN	PYROCOCCUS HORIKOSHII	X-RAY	2.6	NI
3iwt	178AA LONG HYPOTHETICAL MOLYBDENUM COFACTOR BIOSYNTHESIS	SULFOLOBUS TOKODAII	X-RAY	1.9	GOL
3is3	17BETA-HYDROXYSTEROID DEHYDROGENASE	COCHLIOBOLUS LUNATUS	X-RAY	1.48	PEG
2gan	182AA LONG HYPOTHETICAL PROTEIN	PYROCOCCUS HORIKOSHII	X-RAY	2.1	SO4
5ll6	18S RIBOSOMAL RNA	SACCHAROMYCES CEREVISIAE	ELECTRON	3.9	ANP
2ddz	190AA LONG HYPOTHETICAL PROTEIN	PYROCOCCUS HORIKOSHII	X-RAY	2.24	GOL
3eu7	19MERIC PEPTIDE FROM BREAST CANCER TYPE 2 SUSCEPTIBILITY	HOMO SAPIENS	X-RAY	2.2	GOL
4ewl	1D-MYO-INOSITOL 2-ACETAMIDO-2-DEOXY-ALPHA-D-GLUCOPYRANOSIDE	MYCOBACTERIUM TUBERCULOSIS	X-RAY	1.85	ACT
2wj6	1H-3-HYDROXY-4-OXOQUINALDINE 2,4-DIOXYGENASE	ARTHROBACTER NITROGUAJACOLICUS	X-RAY	2	ZZ8
6bxl	2-(3-AMINO-3-CARBOXYPROPYL)HISTIDINE SYNTHASE	PYROCOCCUS HORIKOSHII (STRAIN ATCC 700860 / DSM	X-RAY	2.3	SAM
2cfc	2-(R)-HYDROXYPROPYL-COM DEHYDROGENASE	XANTHOBACTER AUTOTROPHICUS	X-RAY	1.8	KPC
4i0z	2-{(1S)-1-[(6-CHLORO-3,3-DIMETHYL-3,4-DIHYDROISOQUINOLIN-1-		X-RAY	1.8	1BB
1wdy	2-5A-DEPENDENT RIBONUCLEASE	HOMO SAPIENS	X-RAY	1.8	25A
4era	2-AMINO-3-CARBOXYMUCONATE 6-SEMIALDEHYDE DECARBOXYLASE	PSEUDOMONAS FLUORESCENS	X-RAY	2.4	CO
2wm1	2-AMINO-3-CARBOXYMUCONATE-6-SEMIALDEHYDE	HOMO SAPIENS	X-RAY	2.01	13P
4ih3	2-AMINO-3-CARBOXYMUCONATE-6-SEMIALDEHYDE DECARBOXYLASE	HOMO SAPIENS	X-RAY	2.49	PDC
3tqx	2-AMINO-3-KETOBUTYRATE COENZYME A LIGASE	COXIELLA BURNETII	X-RAY	2.3	PLP
1fc4	2-AMINO-3-KETOBUTYRATE CONENZYME A LIGASE	ESCHERICHIA COLI	X-RAY	2	PLP
3ip0	2-AMINO-4-HYDROXY-6-HYDROXYMETHYLDIHYDROPTERIDINE	ESCHERICHIA COLI	X-RAY	0.89	HHR
3hd2	2-AMINO-4-HYDROXY-6-HYDROXYMETHYLDIHYDROPTERIDINE	ESCHERICHIA COLI K-12	X-RAY	1.1	PE0
3hd2a	2-AMINO-4-HYDROXY-6-HYDROXYMETHYLDIHYDROPTERIDINE	ESCHERICHIA COLI K-12	X-RAY	1.1	APC
3mcn	2-AMINO-4-HYDROXY-6-HYDROXYMETHYLDIHYDROPTERIDINE	FRANCISELLA TULARENSIS SUBSP. HOLARCTICA	X-RAY	2.2	B57
5etr	2-AMINO-4-HYDROXY-6-HYDROXYMETHYLDIHYDROPTERIDINE	STAPHYLOCOCCUS AUREUS	X-RAY	1.32	5RW
3vsj	2-AMINO-5-CHLOROPHENOL 1,6-DIOXYGENASE ALPHA SUBUNIT	COMAMONAS TESTOSTERONI	X-RAY	2.3	2XP
3vsja	2-AMINO-5-CHLOROPHENOL 1,6-DIOXYGENASE ALPHA SUBUNIT	COMAMONAS TESTOSTERONI	X-RAY	2.3	2X7
1m32	2-AMINOETHYLPHOSPHONATE-PYRUVATE AMINOTRANSFERASE	SALMONELLA TYPHIMURIUM	X-RAY	2.2	PLP
5klo	2-AMINOMUCONATE 6-SEMIALDEHYDE DEHYDROGENASE	PSEUDOMONAS FLUORESCENS	X-RAY	1.79	2VS
2amt	2-C-METHYL-D-ERYTHRITOL 2,4-CYCLODIPHOSPHATE	ESCHERICHIA COLI	X-RAY	2.3	1AA
3ern	2-C-METHYL-D-ERYTHRITOL 2,4-CYCLODIPHOSPHATE	ESCHERICHIA COLI K-12	X-RAY	2.1	CAR
1iv4	2-C-METHYL-D-ERYTHRITOL 2,4-CYCLODIPHOSPHATE	THERMUS THERMOPHILUS	X-RAY	1.55	C5P
2pmp	2-C-METHYL-D-ERYTHRITOL 2,4-CYCLODIPHOSPHATE SYNTHASE	ARABIDOPSIS THALIANA	X-RAY	2.3	C5P
5iwy	2-C-METHYL-D-ERYTHRITOL 2,4-CYCLODIPHOSPHATE SYNTHASE	BACILLUS SUBTILIS (STRAIN 168)	X-RAY	1.99	C5P
4c8e	2-C-METHYL-D-ERYTHRITOL 2,4-CYCLODIPHOSPHATE SYNTHASE	BURKHOLDERIA CENOCEPACIA	X-RAY	1.9	C5P
5l03	2-C-METHYL-D-ERYTHRITOL 2,4-CYCLODIPHOSPHATE SYNTHASE	BURKHOLDERIA PSEUDOMALLEI	X-RAY	1.47	6ZB
1gx1	2-C-METHYL-D-ERYTHRITOL 2,4-CYCLODIPHOSPHATE SYNTHASE	ESCHERICHIA COLI	X-RAY	1.8	CDP
3elc	2-C-METHYL-D-ERYTHRITOL 2,4-CYCLODIPHOSPHATE SYNTHASE	ESCHERICHIA COLI K-12	X-RAY	2.5	F01
3re3	2-C-METHYL-D-ERYTHRITOL 2,4-CYCLODIPHOSPHATE SYNTHASE	FRANCISELLA TULARENSIS SUBSP. TULARENSIS	X-RAY	2.65	POP
1vha	2-C-METHYL-D-ERYTHRITOL 2,4-CYCLODIPHOSPHATE SYNTHASE	HAEMOPHILUS INFLUENZAE	X-RAY	2.35	POP
4c81	2-C-METHYL-D-ERYTHRITOL 2,4-CYCLODIPHOSPHATE SYNTHASE	PLASMODIUM FALCIPARUM	X-RAY	1.56	CDP
5b8f	2-C-METHYL-D-ERYTHRITOL 2,4-CYCLODIPHOSPHATE SYNTHASE	PSEUDOMONAS AERUGINOSA (STRAIN ATCC 15692 /	X-RAY	1.45	C5P
3t80	2-C-METHYL-D-ERYTHRITOL 2,4-CYCLODIPHOSPHATE SYNTHASE	SALMONELLA ENTERICA SUBSP. ENTERICA SEROVAR	X-RAY	2.5	CTN
3ghz	2-C-METHYL-D-ERYTHRITOL 2,4-CYCLODIPHOSPHATE SYNTHASE	SALMONELLA TYPHIMURIUM	X-RAY	2.03	GOL
1h3m	2-C-METHYL-D-ERYTHRITOL 4-PHOSPHATE	ESCHERICHIA COLI	X-RAY	2.4	N2P
2vsh	2-C-METHYL-D-ERYTHRITOL 4-PHOSPHATE	STREPTOCOCCUS PNEUMONIAE	X-RAY	2	1PE
3q80	2-C-METHYL-D-ERYTHRITOL 4-PHOSPHATE CYTIDYLTRANSFERASE	MYCOBACTERIUM TUBERCULOSIS	X-RAY	2	CDM
5hs2	2-C-METHYL-D-ERYTHRITOL 4-PHOSPHATE CYTIDYLYLTRANSFERASE	BACILLUS SUBTILIS (STRAIN 168)	X-RAY	1.9	CTP
4zdq	2-C-METHYL-D-ERYTHRITOL 4-PHOSPHATE CYTIDYLYLTRANSFERASE	BURKHOLDERIA THAILANDENSIS	X-RAY	2.3	CTP
3n9w	2-C-METHYL-D-ERYTHRITOL 4-PHOSPHATE CYTIDYLYLTRANSFERASE	ESCHERICHIA COLI	X-RAY	1.9	PGO
2xwl	2-C-METHYL-D-ERYTHRITOL 4-PHOSPHATE CYTIDYLYLTRANSFERASE	MYCOBACTERIUM SMEGMATIS	X-RAY	1.49	CTP
2xwn	2-C-METHYL-D-ERYTHRITOL 4-PHOSPHATE CYTIDYLYLTRANSFERASE	MYCOBACTERIUM TUBERCULOSIS	X-RAY	2.9	CTP
2vsi	2-C-METHYL-D-ERYTHRITOL 4-PHOSPHATE CYTIDYLYLTRANSFERASE	STREPTOCOCCUS PNEUMONIAE	X-RAY	2.75	CDF
1vpa	2-C-METHYL-D-ERYTHRITOL 4-PHOSPHATE CYTIDYLYLTRANSFERASE	THERMOTOGA MARITIMA	X-RAY	2.67	CTP
2yc3	2-C-METHYL-D-ERYTHRITOL 4-PHOSPHATE CYTIDYLYLTRANSFERASE,	ARABIDOPSIS THALIANA	X-RAY	1.4	MW5
2v82	2-DEHYDRO-3-DEOXY-6-PHOSPHOGALACTONATE ALDOLASE	ESCHERICHIA COLI	X-RAY	2.1	KDP
4uxd	2-DEHYDRO-3-DEOXY-D-GLUCONATE/2-DEHYDRO-3-DEOXY-	PICROPHILUS TORRIDUS	X-RAY	2.5	GOL
1dxf	2-DEHYDRO-3-DEOXY-GALACTARATE ALDOLASE	ESCHERICHIA COLI	X-RAY	2.6	PYR
6g3z	2-DEHYDRO-3-DEOXY-PHOSPHOGLUCONATE/2-DEHYDRO-3-DEOXY-6-	SULFOLOBUS SOLFATARICUS	X-RAY	2.35	ELE
4tv6	2-DEHYDRO-3-DEOXYGLUCARATE ALDOLASE	STAPHYLOCOCCUS AUREUS	X-RAY	2.6	OAA
4eum	2-DEHYDRO-3-DEOXYGLUCONOKINASE	OCEANICOLA GRANULOSUS	X-RAY	1.8	AMP
4c1k	2-DEHYDRO-3-DEOXYPHOSPHOHEPTONATE ALDOLASE	PYROCOCCUS FURIOSUS	X-RAY	2.15	PEP
2nwr	2-DEHYDRO-3-DEOXYPHOSPHOOCTONATE ALDOLASE	AQUIFEX AEOLICUS	X-RAY	1.5	PEP
3fs2	2-DEHYDRO-3-DEOXYPHOSPHOOCTONATE ALDOLASE	BRUCELLA MELITENSIS	X-RAY	1.85	PO4
1g7v	2-DEHYDRO-3-DEOXYPHOSPHOOCTONATE ALDOLASE	ESCHERICHIA COLI	X-RAY	2.4	PAI
4z1d	2-DEHYDRO-3-DEOXYPHOSPHOOCTONATE ALDOLASE	HELICOBACTER PYLORI (STRAIN ATCC 700392 /	X-RAY	1.65	PEP
3tmq	2-DEHYDRO-3-DEOXYPHOSPHOOCTONATE ALDOLASE 2	BURKHOLDERIA PSEUDOMALLEI	X-RAY	2.1	A5P
5x20	2-DEHYDROPANTOATE 2-REDUCTASE	ENTEROCOCCUS FAECIUM	X-RAY	2.4	AOT
1yon	2-DEHYDROPANTOATE 2-REDUCTASE	ESCHERICHIA COLI	X-RAY	1.95	A2R
3i83	2-DEHYDROPANTOATE 2-REDUCTASE	METHYLOCOCCUS CAPSULATUS	X-RAY	1.9	ACY
2qyt	2-DEHYDROPANTOATE 2-REDUCTASE	PORPHYROMONAS GINGIVALIS	X-RAY	2.15	SO4
3hwr	2-DEHYDROPANTOATE 2-REDUCTASE	RALSTONIA EUTROPHA	X-RAY	2.15	BCN
4yca	2-DEHYDROPANTOATE 2-REDUCTASE	STAPHYLOCOCCUS AUREUS	X-RAY	1.81	NDP
4s3m	2-DEHYDROPANTOATE 2-REDUCTASE	STAPHYLOCOCCUS AUREUS SUBSP. AUREUS MU50	X-RAY	2.6	NAP
5ayv	2-DEHYDROPANTOATE 2-REDUCTASE	THERMOCOCCUS KODAKARENSIS KOD1	X-RAY	1.65	NAP
4hp8	2-DEOXY-D-GLUCONATE 3-DEHYDROGENASE	AGROBACTERIUM TUMEFACIENS	X-RAY	1.35	NAP
4za2	2-DEOXY-D-GLUCONATE 3-DEHYDROGENASE	PECTOBACTERIUM CAROTOVORUM SUBSP. CAROTOVORUM	X-RAY	1.55	NAD
2ekp	2-DEOXY-D-GLUCONATE 3-DEHYDROGENASE	THERMUS THERMOPHILUS	X-RAY	1.15	NAD
2gru	2-DEOXY-SCYLLO-INOSOSE SYNTHASE	BACILLUS CIRCULANS	X-RAY	2.15	EXO
1te2	2-DEOXYGLUCOSE-6-P PHOSPHATASE	ESCHERICHIA COLI	X-RAY	1.76	PGA
2dub	2-ENOYL-COA HYDRATASE	RATTUS NORVEGICUS	X-RAY	2.4	CO8
1qh9	2-HALOACID DEHALOGENASE	PSEUDOMONAS SP.	X-RAY	2.5	LAC
2w11	2-HALOALKANOIC ACID DEHALOGENASE	SULFOLOBUS TOKODAII	X-RAY	1.9	2OP
2fea	2-HYDROXY-3-KETO-5-METHYLTHIOPENTENYL-1-PHOSPHATE	BACILLUS SUBTILIS	X-RAY	2	EDO
2wug	2-HYDROXY-6-OXO-6-PHENYLHEXA-2,4-DIENOATE	MYCOBACTERIUM TUBERCULOSIS	X-RAY	1.8	HPK
2puj	2-HYDROXY-6-OXO-6-PHENYLHEXA-2,4-DIENOATE HYDROLASE	BURKHOLDERIA XENOVORANS	X-RAY	1.57	HPZ
2wue	2-HYDROXY-6-OXO-6-PHENYLHEXA-2,4-DIENOATE HYDROLASE BPHD	MYCOBACTERIUM TUBERCULOSIS	X-RAY	1.8	KEK
1uk8	2-HYDROXY-6-OXO-7-METHYLOCTA-2,4-DIENOATE	PSEUDOMONAS FLUORESCENS	X-RAY	1.6	LEA
5j23	2-HYDROXYACID DEHYDROGENASE	RHIZOBIUM MELILOTI (STRAIN 1021)	X-RAY	2.3	A2R
4cy8	2-HYDROXYBIPHENYL 3-MONOOXYGENASE	PSEUDOMONAS NITROREDUCENS HBP1	X-RAY	2.03	FDA
2imf	2-HYDROXYCHROMENE-2-CARBOXYLATE ISOMERASE	PSEUDOMONAS PUTIDA	X-RAY	1.3	GSH, TOM
4wuv	2-HYDROXYCYCLOHEXANECARBOXYL-COA DEHYDROGENASE	HAEMOPHILUS INFLUENZAE RDAW	X-RAY	1.55	NAD
1ppd	2-HYDROXYETHYL-THIOPAPAIN	CARICA PAPAYA	X-RAY	2	BME
4dbh	2-HYDROXYHEPTA-2,4-DIENE-1,7-DIOATE ISOMERASE	CORYNEBACTERIUM GLUTAMICUM	X-RAY	1.94	OXL
4r3u	2-HYDROXYISOBUTYRYL-COA MUTASE LARGE SUBUNIT	AQUINCOLA TERTIARICARBONIS	X-RAY	2.5	5AD
4r3ua	2-HYDROXYISOBUTYRYL-COA MUTASE LARGE SUBUNIT	AQUINCOLA TERTIARICARBONIS	X-RAY	2.5	3HC
6bgn	2-HYDROXYMUCONATE TAUTOMERASE	PSEUDOMONAS PUTIDA	X-RAY	1.51	6Y5
4ov4	2-ISOPROPYLMALATE SYNTHASE	LEPTOSPIRA BIFLEXA	X-RAY	2	KIV
3hq1	2-ISOPROPYLMALATE SYNTHASE	MYCOBACTERIUM TUBERCULOSIS	X-RAY	1.7	FLC
1w3i	2-KETO-3-DEOXY GLUCONATE ALDOLASE	SULFOLOBUS SOLFATARICUS	X-RAY	1.7	PYR
2r94	2-KETO-3-DEOXY-(6-PHOSPHO-)GLUCONATE ALDOLASE	THERMOPROTEUS TENAX	X-RAY	2.2	PYR
1wa3	2-KETO-3-DEOXY-6-PHOSPHOGLUCONATE ALDOLASE	THERMOTOGA MARITIMA	X-RAY	1.9	PYR
2q1a	2-KETO-3-DEOXY-D-ARABINONATE DEHYDRATASE	SULFOLOBUS SOLFATARICUS	X-RAY	2.5	2KT
4hgn	2-KETO-3-DEOXY-D-MANNO-OCTULOSONATE 8-PHOSPHATE	BACTEROIDES THETAIOTAOMICRON	X-RAY	1.8	MG
1v1a	2-KETO-3-DEOXYGLUCONATE KINASE	THERMUS THERMOPHILUS	X-RAY	2.1	KDG
1v1aa	2-KETO-3-DEOXYGLUCONATE KINASE	THERMUS THERMOPHILUS	X-RAY	2.1	ADP
2nuy	2-KETO-3-DEOXYGLUCONATE/2-KETO-3-DEOXY-6-PHOSPHO GLUCONATE	SULFOLOBUS ACIDOCALDARIUS DSM 639	X-RAY	2.5	PYR
2wqt	2-KETO-4-PENTENOATE HYDRATASE	ESCHERICHIA COLI	X-RAY	2.8	PO4
2lxy	2-MERCAPTOPHENOL-ALPHA3C		SOLUTION		HTS
4obx	2-METHOXY-6-POLYPRENYL-1,4-BENZOQUINOL METHYLASE,	SACCHAROMYCES CEREVISIAE	X-RAY	2.2	TAM
4jy3	2-METHYL-3-HYDROXYPYRIDINE-5-CARBOXYLIC ACID OXYGENASE	MESORHIZOBIUM LOTI	X-RAY	1.77	5PR
4jy3a	2-METHYL-3-HYDROXYPYRIDINE-5-CARBOXYLIC ACID OXYGENASE	MESORHIZOBIUM LOTI	X-RAY	1.77	FAD
4h2q	2-METHYL-3-HYDROXYPYRIDINE-5-CARBOXYLIC ACID OXYGENASE	RHIZOBIUM LOTI	X-RAY	1.5	5HN
4h2qa	2-METHYL-3-HYDROXYPYRIDINE-5-CARBOXYLIC ACID OXYGENASE	RHIZOBIUM LOTI	X-RAY	1.5	FAD
5hxi	2-METHYL-3-HYDROXYPYRIDINE-5-CARBOXYLIC ACID OXYGENASE	RHIZOBIUM LOTI (STRAIN MAFF303099)	X-RAY	1.5	5HN
5k87	2-METHYL-ACONITATE ISOMERASE	SHEWANELLA ONEIDENSIS	X-RAY	1.22	MLI
1x74	2-METHYLACYL-COA RACEMASE	MYCOBACTERIUM TUBERCULOSIS	X-RAY	1.79	GOL
5mux	2-METHYLCITRATE DEHYDRATASE	BACILLUS SUBTILIS (STRAIN 168)	X-RAY	2	TLA
5uqu	2-METHYLCITRATE SYNTHASE, MITOCHONDRIAL	NEOSARTORYA FUMIGATA	X-RAY	1.7	COA
5uqua	2-METHYLCITRATE SYNTHASE, MITOCHONDRIAL	NEOSARTORYA FUMIGATA	X-RAY	1.7	OAA
6bol	2-METHYLCITRATE SYNTHASE, MITOCHONDRIAL	NEOSARTORYA FUMIGATA (STRAIN CEA10 / CBS 144.89	X-RAY	2.2	PO4
3v1v	2-METHYLISOBORNEOL SYNTHASE	STREPTOMYCES COELICOLOR	X-RAY	1.8	GST
1mum	2-METHYLISOCITRATE LYASE	ESCHERICHIA COLI	X-RAY	1.9	MG
3bw2	2-NITROPROPANE DIOXYGENASE	STREPTOMYCES ANSOCHROMOGENES	X-RAY	2.1	FMN
5g2u	2-O GLYCOSAMINOGLYCAN SULFATASE	BACTEROIDES THETAIOTAOMICRON	X-RAY	1.43	CIT
4c0n	2-ON-2 HEMOGLOBIN	ARABIDOPSIS THALIANA	X-RAY	1.77	HEM
1umd	2-OXO ACID DEHYDROGENASE ALPHA SUBUNIT	THERMUS THERMOPHILUS	X-RAY	1.9	TDP
1z02	2-OXO-1,2-DIHYDROQUINOLINE 8-MONOOXYGENASE, OXYGENASE	PSEUDOMONAS PUTIDA	X-RAY	1.8	FES
2eb5	2-OXO-HEPT-3-ENE-1,7-DIOATE HYDRATASE	ESCHERICHIA COLI	X-RAY	1.7	OXL
5b46	2-OXOACID--FERREDOXIN OXIDOREDUCTASE ALPHA SUBUNIT	SULFOLOBUS TOKODAII STR. 7	X-RAY	2.1	TPP
4nhx	2-OXOGLUTARATE AND IRON-DEPENDENT OXYGENASE DOMAIN-	HOMO SAPIENS	X-RAY	2.11	OGA
2yic	2-OXOGLUTARATE DECARBOXYLASE	MYCOBACTERIUM SMEGMATIS	X-RAY	1.96	TPP
2jgd	2-OXOGLUTARATE DEHYDROGENASE E1 COMPONENT	ESCHERICHIA COLI	X-RAY	2.6	AMP
2yqu	2-OXOGLUTARATE DEHYDROGENASE E3 COMPONENT	THERMUS THERMOPHILUS	X-RAY	1.7	FAD
2w2i	2-OXOGLUTARATE OXYGENASE	HOMO SAPIENS	X-RAY	2.1	PD2
5lun	2-OXOGLUTARATE-DEPENDENT ETHYLENE/SUCCINATE-FORMING ENZYME	PSEUDOMONAS SAVASTANOI PV. PHASEOLICOLA	X-RAY	1.08	OGA
2bfd	2-OXOISOVALERATE DEHYDROGENASE ALPHA SUBUNIT	HOMO SAPIENS	X-RAY	1.39	TDP
1qs0	2-OXOISOVALERATE DEHYDROGENASE ALPHA-SUBUNIT	PSEUDOMONAS PUTIDA	X-RAY	2.4	TDP
3q6j	2-OXOPROPYL-COM REDUCTASE, CARBOXYLATING	XANTHOBACTER AUTOTROPHICUS	X-RAY	1.92	NAP
6bwh	2-PHOSPHO-L-LACTATE GUANYLYLTRANSFERASE	MYCOBACTERIUM TUBERCULOSIS	X-RAY	2.18	PEP
3c3d	2-PHOSPHO-L-LACTATE TRANSFERASE	METHANOSARCINA MAZEI GO1	X-RAY	2.5	FO1
1ee0	2-PYRONE SYNTHASE	GERBERA HYBRID CULTIVAR	X-RAY	2.05	CAA
4di9	2-PYRONE-4,6-DICARBAXYLATE HYDROLASE	SPHINGOMONAS PAUCIMOBILIS	X-RAY	1.35	0GY
2x7j	2-SUCCINYL-5-ENOLPYRUVYL-6-HYDROXY-3-CYCLOHEXENE	BACILLUS SUBTILIS	X-RAY	2.35	TPP
2jlc	2-SUCCINYL-5-ENOLPYRUVYL-6-HYDROXY-3-CYCLOHEXENE	ESCHERICHIA COLI	X-RAY	2.5	TPP
5ej8	2-SUCCINYL-5-ENOLPYRUVYL-6-HYDROXY-3-CYCLOHEXENE-1-	ESCHERICHIA COLI K12	X-RAY	1.34	TD6
5eso	2-SUCCINYL-5-ENOLPYRUVYL-6-HYDROXY-3-CYCLOHEXENE-1-	MYCOBACTERIUM TUBERCULOSIS (STRAIN ATCC 25618 /	X-RAY	2.05	TDP
4myd	2-SUCCINYL-6-HYDROXY-2,4-CYCLOHEXADIENE-1-CARBOXYLATE	ESCHERICHIA COLI	X-RAY	1.37	164
5bus	2-SUCCINYLBENZOATE--COA LIGASE	BACILLUS SUBTILIS (STRAIN 168)	X-RAY	2.6	AMP
6nj0	2-SUCCINYLBENZOATE--COA LIGASE	ESCHERICHIA COLI (STRAIN K12)	X-RAY	1.83	KOY
1zod	2,2-DIALKYLGLYCINE DECARBOXYLASE	BURKHOLDERIA CEPACIA	X-RAY	1.8	PLP
6e6i	2,2',3-TRIHYDROXY-3'-METHOXY-5,5'-DICARBOXYBIPHENYL META-	SPHINGOBIUM SP. SYK-6	X-RAY	2.4	HVS
3gp3	2,3-BISPHOSPHOGLYCERATE-DEPENDENT PHOSPHOGLYCERATE MUTASE	BURKHOLDERIA PSEUDOMALLEI	X-RAY	1.5	SEP
3fdz	2,3-BISPHOSPHOGLYCERATE-DEPENDENT PHOSPHOGLYCERATE MUTASE	BURKHOLDERIA PSEUDOMALLEI 1710B	X-RAY	2.25	DG2
1rii	2,3-BISPHOSPHOGLYCERATE-DEPENDENT PHOSPHOGLYCERATE MUTASE	MYCOBACTERIUM TUBERCULOSIS	X-RAY	1.7	GOL
5um0	2,3-BISPHOSPHOGLYCERATE-DEPENDENT PHOSPHOGLYCERATE MUTASE	NEISSERIA GONORRHOEAE (STRAIN NCCP11945)	X-RAY	1.85	TLA
1o98	2,3-BISPHOSPHOGLYCERATE-INDEPENDENT	BACILLUS STEAROTHERMOPHILUS	X-RAY	1.4	2PG
5vpu	2,3-BISPHOSPHOGLYCERATE-INDEPENDENT PHOSPHOGLYCERATE	ACINETOBACTER BAUMANNII	X-RAY	1.5	3PG
4qax	2,3-BISPHOSPHOGLYCERATE-INDEPENDENT PHOSPHOGLYCERATE	STAPHYLOCOCCUS AUREUS SUBSP. AUREUS	X-RAY	2	2PG
5kgn	2,3-BISPHOSPHOGLYCERATE-INDEPENDENT PHOSPHOGLYCERATE	Caenorhabditis elegans	X-RAY	1.95	GOL
3nvl	2,3-BISPHOSPHOGLYCERATE-INDEPENDENT PHOSPHOGLYCERATE	TRYPANOSOMA BRUCEI	X-RAY	2.3	SO4
2yoz	2,3-CYCLIC NUCLEOTIDE 3'-PHOSPHODIESTERASE	MUS MUSCULUS	X-RAY	2.1	OVE
5xtg	2,3-DIHYDROXY-2,3-DIHYDROPHENYLPROPIONATE DEHYDROGENASE	PSEUDOMONAS SP. MC1	X-RAY	2.32	BPY
1mdb	2,3-DIHYDROXYBENZOATE-AMP LIGASE	BACILLUS SUBTILIS	X-RAY	2.15	AMP
6iyk	2,3-DIHYDROXYBENZOATE-AMP LIGASE COMPONENT OF ENTEROBACTIN	ESCHERICHIA COLI 1303	X-RAY	2.45	B1U
1han	2,3-DIHYDROXYBIPHENYL 1,2-DIOXYGENASE	BURKHOLDERIA XENOVORANS	X-RAY	1.9	TBU
1kw6	2,3-DIHYDROXYBIPHENYL DIOXYGENASE	PSEUDOMONAS SP.	X-RAY	1.45	BPY
2oem	2,3-DIKETO-5-METHYLTHIOPENTYL-1-PHOSPHATE ENOLASE	GEOBACILLUS KAUSTOPHILUS	X-RAY	1.7	1AE
3fa3	2,3-DIMETHYLMALATE LYASE	ASPERGILLUS NIGER	X-RAY	2.6	OAF
1kgq	2,3,4,5-TETRAHYDROPYRIDINE-2-CARBOXYLATE N-	MYCOBACTERIUM BOVIS	X-RAY	2	SCO
6amz	2,3,4,5-TETRAHYDROPYRIDINE-2,6-DICARBOXYLATE N-	ACINETOBACTER BAUMANNII	X-RAY	2.05	MRD
5e3r	2,3,4,5-TETRAHYDROPYRIDINE-2,6-DICARBOXYLATE N-	CORYNEBACTERIUM GLUTAMICUM	X-RAY	1.85	NPI
5e3q	2,3,4,5-TETRAHYDROPYRIDINE-2,6-DICARBOXYLATE N-	CORYNEBACTERIUM GLUTAMICUM (STRAIN ATCC 13032 /	X-RAY	1.8	SCA
3cj8	2,3,4,5-TETRAHYDROPYRIDINE-2,6-DICARBOXYLATE N-	ENTEROCOCCUS FAECALIS	X-RAY	1.95	PEG
2vo4	2,4-D INDUCIBLE GLUTATHIONE S-TRANSFERASE	GLYCINE MAX	X-RAY	1.75	GTB
1n9g	2,4-DIENOYL-COA REDUCTASE	CANDIDA TROPICALIS	X-RAY	1.98	NAP
1ps9	2,4-DIENOYL-COA REDUCTASE	ESCHERICHIA COLI	X-RAY	2.2	FAD
1ps9a	2,4-DIENOYL-COA REDUCTASE	ESCHERICHIA COLI	X-RAY	2.2	FMN
1ps9b	2,4-DIENOYL-COA REDUCTASE	ESCHERICHIA COLI	X-RAY	2.2	NAP
1ps9c	2,4-DIENOYL-COA REDUCTASE	ESCHERICHIA COLI	X-RAY	2.2	MDE
1w6u	2,4-DIENOYL-COA REDUCTASE, MITOCHONDRIAL	HOMO SAPIENS	X-RAY	1.75	NAP
2v5k	2,4-DIHYDROXYHEPT-2-ENE-1,7-DIOIC ACID ALDOLASE	ESCHERICHIA COLI	X-RAY	2.2	OXM
4p9g	2,4'-DIHYDROXYACETOPHENONE DIOXYGENASE	ALCALIGENES SP.	X-RAY	2.2	GOL
4ha9	2,5-DIAMINO-6-RIBOSYLAMINO-4(3H)-PYRIMIDINONE 5'-PHOSPHATE	SACCHAROMYCES CEREVISIAE	X-RAY	2.35	NDP
1mzr	2,5-DIKETO-D-GLUCONATE REDUCTASE A	ESCHERICHIA COLI	X-RAY	2.13	GOL
1vp5	2,5-DIKETO-D-GLUCONIC ACID REDUCTASE	THERMOTOGA MARITIMA	X-RAY	2.4	NAP
5dan	2,5-DIKETO-D-GLUCONIC ACID REDUCTASE	THERMOTOGA MARITIMA (STRAIN ATCC 43589 / MSB8 /	X-RAY	2	NAP
1m9h	2,5-DIKETO-D-GLUCONIC ACID REDUCTASE A	CORYNEBACTERIUM SP.	X-RAY	2	NAD
2vou	2,6-DIHYDROXYPYRIDINE HYDROXYLASE	ARTHROBACTER NICOTINOVORANS	X-RAY	2.6	GOL
4ig8	2'-5'-OLIGOADENYLATE SYNTHASE 1	HOMO SAPIENS	X-RAY	2.7	DTP
4qak	2'-5'-RNA LIGASE	ESCHERICHIA COLI	X-RAY	2.02	2AM
4p5e	2'-DEOXYNUCLEOSIDE 5'-PHOSPHATE N-HYDROLASE 1	HOMO SAPIENS	X-RAY	1.35	N6P
3r24	2'-O-METHYL TRANSFERASE	SARS CORONAVIRUS	X-RAY	2	SAM
2xmi	2', 3'-CYCLIC-NUCLEOTIDE 3'-PHOSPHODIESTERASE	MUS MUSCULUS	X-RAY	1.74	FLC
3jyf	2',3'-CYCLIC NUCLEOTIDE 2'-PHOSPHODIESTERASE/3'-	KLEBSIELLA PNEUMONIAE SUBSP. PNEUMONIAE	X-RAY	2.43	EPE
1woj	2',3'-CYCLIC-NUCLEOTIDE 3'-PHOSPHODIESTERASE	HOMO SAPIENS	X-RAY	1.8	PO4
4z2b	2',5'-PHOSPHODIESTERASE 12	HOMO SAPIENS	X-RAY	1.8	4LC
4wqk	2''-AMINOGLYCOSIDE NUCLEOTIDYLTRANSFERASE	KLEBSIELLA PNEUMONIAE	X-RAY	1.48	GOL
6b11	20-OXO-5-O-MYCAMINOSYLTYLACTONE 23-MONOOXYGENASE	STREPTOMYCES FRADIAE	X-RAY	1.99	CGM
2fhh	20S PROTEASOME, ALPHA AND BETA SUBUNITS	MYCOBACTERIUM TUBERCULOSIS	X-RAY	2.99	M1N
2pwt	22-MER OF THE RIBOSOMAL DECODING SITE		X-RAY	1.8	LHA
1v2b	23-KDA POLYPEPTIDE OF PHOTOSYSTEM II OXYGEN-	NICOTIANA TABACUM	X-RAY	1.6	GLC
2dto	235AA LONG HYPOTHETICAL BIOTIN--[ACETYL-COA-CARBOXYLASE]	PYROCOCCUS HORIKOSHII	X-RAY	1.5	BTN
2dtoa	235AA LONG HYPOTHETICAL BIOTIN--[ACETYL-COA-CARBOXYLASE]	PYROCOCCUS HORIKOSHII	X-RAY	1.5	ATP
5d8h	23S RIBOSOMAL RNA	STREPTOMYCES AZUREUS	X-RAY	2.8	TRS
4nxh	23S RIBOSOMAL RNA SARCIN RICIN LOOP	ESCHERICHIA COLI	X-RAY	1.16	GOL
1jzx	23S RRNA	DEINOCOCCUS RADIODURANS	X-RAY	3.1	CLY
2bh2	23S RRNA (URACIL-5-)-METHYLTRANSFERASE RUMA	ESCHERICHIA COLI	X-RAY	2.15	SAH
3nk7	23S RRNA METHYLTRANSFERASE	STREPTOMYCES ACTUOSUS	X-RAY	2.1	SAM
6f5z	24-STEROL C-METHYLTRANSFERASE	HALOFERAX VOLCANII (STRAIN ATCC 29605 / DSM	X-RAY	1.35	SAH
5nnw	25 KDA PROTEIN ELICITOR	PYTHIUM APHANIDERMATUM	X-RAY	1.54	GCS
2is4	25-MER	ESCHERICHIA COLI	X-RAY	2.6	ANP
2owo	26-MER	ESCHERICHIA COLI	X-RAY	2.3	AMP
6mt7	26.7 KDA SALIVARY PROTEIN	PHLEBOTOMUS DUBOSCQI	X-RAY	1.78	TRT
5vfr	26S PROTEASOME NON-ATPASE REGULATORY SUBUNIT 1	HOMO SAPIENS	ELECTRON	4.9	AGS
2dwz	26S PROTEASOME NON-ATPASE REGULATORY SUBUNIT 10	RATTUS NORVEGICUS	X-RAY	2.4	EPE
2o95	26S PROTEASOME NON-ATPASE REGULATORY SUBUNIT 7	HOMO SAPIENS	X-RAY	1.95	12P
2o95a	26S PROTEASOME NON-ATPASE REGULATORY SUBUNIT 7	HOMO SAPIENS	X-RAY	1.95	PG4
4b0z	26S PROTEASOME REGULATORY SUBUNIT RPN12	SCHIZOSACCHAROMYCES POMBE	X-RAY	1.58	SGM
1rio	27-MER	ENTEROBACTERIA PHAGE LAMBDA	X-RAY	2.3	MPD
2q8y	27.5 KDA VIRULENCE PROTEIN	SALMONELLA ENTERITIDIS	X-RAY	2	B
2z8p	27.5 KDA VIRULENCE PROTEIN	SALMONELLA TYPHIMURIUM	X-RAY	1.8	B
2ggs	273AA LONG HYPOTHETICAL DTDP-4-DEHYDRORHAMNOSE	SULFOLOBUS TOKODAII	X-RAY	1.7	NDP
2g8l	287AA LONG HYPOTHETICAL PROTEIN	PYROCOCCUS HORIKOSHII	X-RAY	2.04	UNL
1kel	28B4 FAB	MUS MUSCULUS	X-RAY	1.9	AAH
2zqo	29-KDA GALACTOSE-BINDING LECTIN	LUMBRICUS TERRESTRIS	X-RAY	1.8	NGA
1a0q	29G11 FAB (LIGHT CHAIN)	MUS MUSCULUS	X-RAY	2.3	HEP
1mwa	2C T CELL RECEPTOR ALPHA CHAIN	MUS MUSCULUS	X-RAY	2.4	Q
1jn1	2C-METHYL-D-ERYTHRITOL 2,4-CYCLODIPHOSPHATE	HAEMOPHILUS INFLUENZAE	X-RAY	2.9	SO4
2uzh	2C-METHYL-D-ERYTHRITOL 2,4-CYCLODIPHOSPHATE	MYCOBACTERIUM SMEGMATIS	X-RAY	2.2	CDP
1jy8	2C-METHYL-D-ERYTHRITOL 2,4-CYCLODIPHOSPHATE SYNTHASE	ESCHERICHIA COLI	X-RAY	2.5	CDI
1t0a	2C-METHYL-D-ERYTHRITOL 2,4-CYCLODIPHOSPHATE SYNTHASE	SHEWANELLA ONEIDENSIS	X-RAY	1.6	FPP
1w77	2C-METHYL-D-ERYTHRITOL 4-PHOSPHATE	ARABIDOPSIS THALIANA	X-RAY	2	C5P
1h47	2C-METHYL-D-ERYTHRITOL-2,4-CYCLODIPHOSPHATE	ESCHERICHIA COLI	X-RAY	2	C5P
1h47a	2C-METHYL-D-ERYTHRITOL-2,4-CYCLODIPHOSPHATE	ESCHERICHIA COLI	X-RAY	2	GPP
4h0i	2D10 SCFV	MUS MUSCULUS	X-RAY	2.4	MMA
3idj	2F5 FAB LIGHT CHAIN	HOMO SAPIENS	X-RAY	2.24	ORN
3d0l	2F5 HEAVY CHAIN	HOMO SAPIENS	X-RAY	2.35	GOL
1doi	2FE-2S FERREDOXIN	HALOARCULA MARISMORTUI	X-RAY	1.9	FES
5v7y	2OG-FE(II) OXYGENASE	BACILLUS ANTHRACIS	X-RAY	2.05	AKG
1n0q	3 ANKYRIN REPEATS		X-RAY	1.26	TFA
1ihi	3-ALPHA-HYDROXYSTEROID DEHYDROGENASE	HOMO SAPIENS	X-RAY	3	IU5
1ihia	3-ALPHA-HYDROXYSTEROID DEHYDROGENASE	HOMO SAPIENS	X-RAY	3	NAP
2dkn	3-ALPHA-HYDROXYSTEROID DEHYDROGENASE	PSEUDOMONAS SP.	X-RAY	1.8	NAI
1afs	3-ALPHA-HYDROXYSTEROID DEHYDROGENASE	RATTUS NORVEGICUS	X-RAY	2.5	NAP
1afsa	3-ALPHA-HYDROXYSTEROID DEHYDROGENASE	RATTUS NORVEGICUS	X-RAY	2.5	TES
1lwi	3-ALPHA-HYDROXYSTEROID/DIHYDRODIOL DEHYDROGENASE	RATTUS NORVEGICUS	X-RAY	2.7	NAP
1hdc	3-ALPHA, 20 BETA-HYDROXYSTEROID DEHYDROGENASE	STREPTOMYCES EXFOLIATUS	X-RAY	2.2	CBO
1re5	3-CARBOXY-CIS,CIS-MUCONATE CYCLOISOMERASE	PSEUDOMONAS PUTIDA	X-RAY	2.6	DTT
1re5a	3-CARBOXY-CIS,CIS-MUCONATE CYCLOISOMERASE	PSEUDOMONAS PUTIDA	X-RAY	2.6	CIT
2boy	3-CHLOROCATECHOL 1,2-DIOXYGENASE	RHODOCOCCUS OPACUS	X-RAY	1.9	BHO
3kip	3-DEHYDROQUINASE, TYPE II	CANDIDA ALBICANS	X-RAY	2.95	TRS
5ydb	3-DEHYDROQUINATE DEHYDRATASE	ACINETOBACTER BAUMANNII (STRAIN ATCC 17978 /	X-RAY	1.76	DQA
1uqr	3-DEHYDROQUINATE DEHYDRATASE	ACTINOBACILLUS PLEUROPNEUMONIAE	X-RAY	1.7	TRS
2egz	3-DEHYDROQUINATE DEHYDRATASE	AQUIFEX AEOLICUS	X-RAY	1.75	TLA
4h3d	3-DEHYDROQUINATE DEHYDRATASE	CLOSTRIDIUM DIFFICILE	X-RAY	1.95	SHL
2c4w	3-DEHYDROQUINATE DEHYDRATASE	HELICOBACTER PYLORI	X-RAY	1.55	GAJ
2y71	3-DEHYDROQUINATE DEHYDRATASE	MYCOBACTERIUM TUBERCULOSIS	X-RAY	1.5	CB6
6cv6	3-DEHYDROQUINATE DEHYDRATASE	PARABURKHOLDERIA PHYMATUM	X-RAY	2.6	TLA
4cnn	3-DEHYDROQUINATE DEHYDRATASE	SALMONELLA ENTERICA SUBSP. ENTERICA SEROVAR	X-RAY	1	CIT
1sfj	3-DEHYDROQUINATE DEHYDRATASE	STAPHYLOCOCCUS AUREUS SUBSP. AUREUS	X-RAY	2.4	DHK
1gtz	3-DEHYDROQUINATE DEHYDRATASE	STREPTOMYCES COELICOLOR	X-RAY	1.6	DHK
3lwz	3-DEHYDROQUINATE DEHYDRATASE	YERSINIA PESTIS	X-RAY	1.65	GOL
1l9w	3-DEHYDROQUINATE DEHYDRATASE AROD	SALMONELLA TYPHI	X-RAY	2.1	DHS
2gpt	3-DEHYDROQUINATE DEHYDRATASE/ SHIKIMATE 5-	ARABIDOPSIS THALIANA	X-RAY	1.95	TLA
2gpta	3-DEHYDROQUINATE DEHYDRATASE/ SHIKIMATE 5-	ARABIDOPSIS THALIANA	X-RAY	1.95	SKM
3zok	3-DEHYDROQUINATE SYNTHASE	ACTINIDIA CHINENSIS	X-RAY	2.4	NAD
1nr5	3-DEHYDROQUINATE SYNTHASE	EMERICELLA NIDULANS	X-RAY	2.1	NAD
1nr5a	3-DEHYDROQUINATE SYNTHASE	EMERICELLA NIDULANS	X-RAY	2.1	CRB
3clh	3-DEHYDROQUINATE SYNTHASE	HELICOBACTER PYLORI	X-RAY	2.4	NAD
3qbd	3-DEHYDROQUINATE SYNTHASE	MYCOBACTERIUM TUBERCULOSIS	X-RAY	2.47	NAD
1xah	3-DEHYDROQUINATE SYNTHASE	STAPHYLOCOCCUS AUREUS	X-RAY	2.2	NAD
3okf	3-DEHYDROQUINATE SYNTHASE	VIBRIO CHOLERAE O1 BIOVAR ELTOR	X-RAY	2.5	NAD
4kdr	3-DEMETHYLUBIQUINONE-9 3-METHYLTRANSFERASE	ESCHERICHIA COLI	X-RAY	2	SAH
1vs1	3-DEOXY-7-PHOSPHOHEPTULONATE SYNTHASE	AEROPYRUM PERNIX	X-RAY	2.3	PEP
5hud	3-DEOXY-D-ARABINO-HEPTULOSONATE 7-PHOSPHATE (DAHP)	CORYNEBACTERIUM GLUTAMICUM	X-RAY	2.15	PO4
3tfc	3-DEOXY-D-ARABINO-HEPTULOSONATE 7-PHOSPHATE SYNTHASE	LISTERIA MONOCYTOGENES	X-RAY	1.95	PEP
4hsn	3-DEOXY-D-ARABINO-HEPTULOSONATE 7-PHOSPHATE SYNTHASE	NEISSERIA MENINGITIDIS	X-RAY	2	PEP
2b7o	3-DEOXY-D-ARABINO-HEPTULOSONATE 7-PHOSPHATE SYNTHASE AROG	MYCOBACTERIUM TUBERCULOSIS	X-RAY	2.3	PEP
5j6f	3-DEOXY-D-ARABINO-HEPTULOSONATE 7-PHOSPHATE SYNTHASE,	GEOBACILLUS SP. GHH01	X-RAY	2.75	PRE
1gg1	3-DEOXY-D-ARABINO-HEPTULOSONATE-7-PHOSPHATE	ESCHERICHIA COLI	X-RAY	2	PGA
5e5g	3-DEOXY-D-ARABINOHEPTULOSONATE-7-PHOSPHATE SYNTHASE	MYCOBACTERIUM TUBERCULOSIS	X-RAY	1.95	DTR
2xci	3-DEOXY-D-MANNO-2-OCTULOSONIC ACID TRANSFERASE	AQUIFEX AEOLICUS	X-RAY	2	PG4
3i6b	3-DEOXY-D-MANNO-OCTULOSONATE 8-PHOSPHATE PHOSPHATASE	ESCHERICHIA COLI	X-RAY	2.49	KDO
4hgp	3-DEOXY-D-MANNO-OCTULOSONATE 8-PHOSPHATE PHOSPHATASE KDSC	HAEMOPHILUS INFLUENZAE	X-RAY	1.8	KDO
4ume	3-DEOXY-D-MANNO-OCTULOSONATE 8-PHOSPHATE PHOSPHATASE KDSC	MORAXELLA CATARRHALIS BC8	X-RAY	2.09	KDO
1d9e	3-DEOXY-D-MANNO-OCTULOSONATE 8-PHOSPHATE SYNTHASE	ESCHERICHIA COLI	X-RAY	2.4	SO4
3fyp	3-DEOXY-D-MANNO-OCTULOSONIC ACID 8-PHOSPHATE SYNTHETASE	NEISSERIA MENINGITIDIS SEROGROUP B	X-RAY	1.85	PEP
4bfc	3-DEOXY-D-MANNO-OCTULOSONIC-ACID TRANSFERASE	ACINETOBACTER BAUMANNII	X-RAY	1.7	SO4
2y6p	3-DEOXY-MANNO-OCTULOSONATE CYTIDYLYLTRANSFERASE	AQUIFEX AEOLICUS	X-RAY	2.1	CTP
3tqd	3-DEOXY-MANNO-OCTULOSONATE CYTIDYLYLTRANSFERASE	COXIELLA BURNETII	X-RAY	1.8	ACT
3k8d	3-DEOXY-MANNO-OCTULOSONATE CYTIDYLYLTRANSFERASE	ESCHERICHIA COLI	X-RAY	1.9	KDO
3k8da	3-DEOXY-MANNO-OCTULOSONATE CYTIDYLYLTRANSFERASE	ESCHERICHIA COLI	X-RAY	1.9	CTP
3duv	3-DEOXY-MANNO-OCTULOSONATE CYTIDYLYLTRANSFERASE	HAEMOPHILUS INFLUENZAE	X-RAY	2.3	KDO
3jtj	3-DEOXY-MANNO-OCTULOSONATE CYTIDYLYLTRANSFERASE	YERSINIA PESTIS	X-RAY	2.18	IMD
3nip	3-GUANIDINOPROPIONASE	PSEUDOMONAS AERUGINOSA	X-RAY	2.5	16D
2rfq	3-HSA HYDROXYLASE, OXYGENASE	RHODOCOCCUS SP.	X-RAY	1.65	1PS
1xpm	3-HYDROXY-3-METHYLGLUTARYL COA SYNTHASE	STAPHYLOCOCCUS AUREUS SUBSP. AUREUS	X-RAY	1.6	HMG
6eev	3-HYDROXY-3-METHYLGLUTARYL COENZYME A REDUCTASE	DELFTIA ACIDOVORANS	X-RAY	1.49	MEV
5wpj	3-HYDROXY-3-METHYLGLUTARYL COENZYME A REDUCTASE	STREPTOCOCCUS PNEUMONIAE	X-RAY	2	NDP
2f9a	3-HYDROXY-3-METHYLGLUTARYL COENZYME A SYNTHASE 1	BRASSICA JUNCEA	X-RAY	2.51	F24
1txt	3-HYDROXY-3-METHYLGLUTARYL-COA SYNTHASE	STAPHYLOCOCCUS AUREUS	X-RAY	2.5	CAA
2r4f	3-HYDROXY-3-METHYLGLUTARYL-COENZYME A REDUCTASE	HOMO SAPIENS	X-RAY	1.7	RIE
4i6y	3-HYDROXY-3-METHYLGLUTARYL-COENZYME A REDUCTASE	PSEUDOMONAS MEVALONII	X-RAY	1.45	MEV
3qae	3-HYDROXY-3-METHYLGLUTARYL-COENZYME A REDUCTASE	STREPTOCOCCUS PNEUMONIAE	X-RAY	2.3	CIT
6n3p	3-HYDROXYACYL-[ACYL-CARRIER-PROTEIN] DEHYDRATASE FABZ	ESCHERICHIA COLI	X-RAY	2.5	XLN
6ihc	3-HYDROXYACYL-[ACYL-CARRIER-PROTEIN] DEHYDRATASE FABZ	HELICOBACTER PYLORI	X-RAY	2.4	CIT
6ihca	3-HYDROXYACYL-[ACYL-CARRIER-PROTEIN] DEHYDRATASE FABZ	HELICOBACTER PYLORI	X-RAY	2.4	PN7
5buw	3-HYDROXYACYL-[ACYL-CARRIER-PROTEIN] DEHYDRATASE FABZ	YERSINIA PESTIS	X-RAY	1.8	EDO
1zej	3-HYDROXYACYL-COA DEHYDROGENASE	ARCHAEOGLOBUS FULGIDUS	X-RAY	2	PE8
4pn3	3-HYDROXYACYL-COA DEHYDROGENASE	BRUCELLA MELITENSIS 64/150	X-RAY	2.15	TRS
4o5o	3-HYDROXYACYL-COA DEHYDROGENASE	BRUCELLA SUIS	X-RAY	1.4	TRS
4xgn	3-HYDROXYACYL-COA DEHYDROGENASE	BURKHOLDERIA THAILANDENSIS	X-RAY	1.65	NAD
1m76	3-HYDROXYACYL-COA DEHYDROGENASE	HOMO SAPIENS	X-RAY	2.15	CAA
1m76a	3-HYDROXYACYL-COA DEHYDROGENASE	HOMO SAPIENS	X-RAY	2.15	NAD
4pzd	3-HYDROXYACYL-COA DEHYDROGENASE	RALSTONIA EUTROPHA H16	X-RAY	2.61	NAD
1u7t	3-HYDROXYACYL-COA DEHYDROGENASE TYPE II	HOMO SAPIENS	X-RAY	2	TDT
1u7ta	3-HYDROXYACYL-COA DEHYDROGENASE TYPE II	HOMO SAPIENS	X-RAY	2	NAD
3fe5	3-HYDROXYANTHRANILATE 3,4-DIOXYGENASE	BOS TAURUS	X-RAY	2.51	FE
4l2n	3-HYDROXYANTHRANILATE 3,4-DIOXYGENASE	CUPRIAVIDUS METALLIDURANS	X-RAY	1.74	FE2
6d61	3-HYDROXYANTHRANILATE 3,4-DIOXYGENASE	CUPRIAVIDUS METALLIDURANS (STRAIN ATCC 43123 /	X-RAY	1.74	4AA
4r52	3-HYDROXYANTHRANILATE 3,4-DIOXYGENASE	CUPRIAVIDUS METALLIDURANS CH34	X-RAY	1.53	FE2
2qnk	3-HYDROXYANTHRANILATE 3,4-DIOXYGENASE	HOMO SAPIENS	X-RAY	1.6	NI
4wzc	3-HYDROXYANTHRANILATE 3,4-DIOXYGENASE	RALSTONIA METALLIDURANS	X-RAY	1.84	1UC
1zvf	3-HYDROXYANTHRANILATE 3,4-DIOXYGENASE	SACCHAROMYCES CEREVISIAE	X-RAY	2.41	NI
1yfx	3-HYDROXYANTHRANILATE-3,4-DIOXYGENASE	CUPRIAVIDUS METALLIDURANS	X-RAY	2	4AA
2dkh	3-HYDROXYBENZOATE HYDROXYLASE	COMAMONAS TESTOSTERONI	X-RAY	1.8	3HB
5b4t	3-HYDROXYBUTYRATE DEHYDROGENASE	ALCALIGENES FAECALIS	X-RAY	1.19	3HR
5b4ta	3-HYDROXYBUTYRATE DEHYDROGENASE	ALCALIGENES FAECALIS	X-RAY	1.19	NAD
5jbx	3-HYDROXYBUTYRYL-COA DEHYDRATASE	MYXOCOCCUS XANTHUS (STRAIN DK 1622)	X-RAY	1.1	COA
4kug	3-HYDROXYBUTYRYL-COA DEHYDROGENASE	CLOSTRIDIUM BUTYRICUM	X-RAY	2.3	NAD
4om8	3-HYDROXYBUTYRYL-COA DEHYDROGENASE	MESORHIZOBIUM LOTI	X-RAY	1.55	NAD
4b0b	3-HYDROXYDECANOYL-[ACYL-CARRIER-PROTEIN] DEHYDRATASE	PSEUDOMONAS AERUGINOSA	X-RAY	1.9	54F
5f6r	3-HYDROXYDECANOYL-[ACYL-CARRIER-PROTEIN] DEHYDRATASE	YERSINIA PESTIS CO92	X-RAY	1.18	5VO
3q62	3-HYDROXYDECANOYL-[ACYL-CARRIER-PROTEIN] DEHYDRATASE	YERSINIA PSEUDOTUBERCULOSIS	X-RAY	1.4	MES
5je8	3-HYDROXYISOBUTYRATE DEHYDROGENASE	BACILLUS CEREUS ATCC 14579	X-RAY	2.1	NAD
5je8a	3-HYDROXYISOBUTYRATE DEHYDROGENASE	BACILLUS CEREUS ATCC 14579	X-RAY	2.1	EPE
2i9p	3-HYDROXYISOBUTYRATE DEHYDROGENASE	HOMO SAPIENS	X-RAY	2.55	NAD
3g0o	3-HYDROXYISOBUTYRATE DEHYDROGENASE	SALMONELLA TYPHIMURIUM	X-RAY	1.8	TLA
2cvz	3-HYDROXYISOBUTYRATE DEHYDROGENASE	THERMUS THERMOPHILUS	X-RAY	1.8	NDP
3pdu	3-HYDROXYISOBUTYRATE DEHYDROGENASE FAMILY PROTEIN	GEOBACTER SULFURREDUCENS	X-RAY	1.89	NAP
3bpt	3-HYDROXYISOBUTYRYL-COA HYDROLASE	HOMO SAPIENS	X-RAY	1.5	QUE
2ch1	3-HYDROXYKYNURENINE TRANSAMINASE	ANOPHELES GAMBIAE	X-RAY	2.4	PLP
4k7g	3-HYDROXYPROLINE DEHYDRATSE	AGROBACTERIUM VITIS S4	X-RAY	2	PYC
4k7ga	3-HYDROXYPROLINE DEHYDRATSE	AGROBACTERIUM VITIS S4	X-RAY	2	CIT
5zai	3-HYDROXYPROPIONYL-COENZYME A DEHYDRATASE	METALLOSPHAERA SEDULA	X-RAY	1.8	COA
1a05	3-ISOPROPYLMALATE DEHYDROGENASE	ACIDITHIOBACILLUS FERROOXIDANS	X-RAY	2	IPM
4xxv	3-ISOPROPYLMALATE DEHYDROGENASE	BURKHOLDERIA THAILANDENSIS	X-RAY	1.7	NAD
3vmk	3-ISOPROPYLMALATE DEHYDROGENASE	SHEWANELLA BENTHICA	X-RAY	1.48	IPM
3vmj	3-ISOPROPYLMALATE DEHYDROGENASE	SHEWANELLA ONEIDENSIS	X-RAY	1.56	IPM
3wzy	3-ISOPROPYLMALATE DEHYDROGENASE	SHEWANELLA ONEIDENSIS MR-1	X-RAY	1.55	IPM
3vml	3-ISOPROPYLMALATE DEHYDROGENASE	SHEWANELLA ONEIDENSIS, SHEWANELLA BENTHICA	X-RAY	1.56	IPM
4y1p	3-ISOPROPYLMALATE DEHYDROGENASE	SULFOLOBUS ACIDOCALDARIUS DSM 639	X-RAY	2.2	IPM
2y3z	3-ISOPROPYLMALATE DEHYDROGENASE	THERMUS THERMOPHILUS	X-RAY	1.83	2PE
5j32	3-ISOPROPYLMALATE DEHYDROGENASE 2, CHLOROPLASTIC	ARABIDOPSIS THALIANA	X-RAY	1.93	IPM
2y7e	3-KETO-5-AMINOHEXANOATE CLEAVAGE ENZYME	CANDIDATUS CLOACAMONAS ACIDAMINOVORANS	X-RAY	1.28	FMT
3c6c	3-KETO-5-AMINOHEXANOATE CLEAVAGE ENZYME	RALSTONIA EUTROPHA	X-RAY	1.72	NI
1q6o	3-KETO-L-GULONATE 6-PHOSPHATE DECARBOXYLASE	ESCHERICHIA COLI	X-RAY	1.2	LG6
1afw	3-KETOACETYL-COA THIOLASE	SACCHAROMYCES CEREVISIAE	X-RAY	1.8	MRD
3rro	3-KETOACYL-(ACYL-CARRIER-PROTEIN) REDUCTASE	VIBRIO CHOLERAE O1 BIOVAR EL TOR	X-RAY	2	EDO
5unl	3-KETOACYL-ACP REDUCTASE	BURKHOLDERIA MULTIVORANS	X-RAY	1.65	NO3
4iin	3-KETOACYL-ACYL CARRIER PROTEIN REDUCTASE (FABG)	HELICOBACTER PYLORI	X-RAY	2.4	NAD
2wu9	3-KETOACYL-COA THIOLASE 2, PEROXISOMAL	ARABIDOPSIS THALIANA	X-RAY	1.5	EDO
3zbg	3-KETOACYL-COA THIOLASE-LIKE PROTEIN	LEISHMANIA MEXICANA	X-RAY	1.85	MPD
4c2k	3-KETOACYL-COA THIOLASE, MITOCHONDRIAL	HOMO SAPIENS	X-RAY	2	MES
4qdc	3-KETOSTEROID 9ALPHA-HYDROXYLASE OXYGENASE	RHODOCOCCUS RHODOCHROUS	X-RAY	1.9	ASD
4c3x	3-KETOSTEROID DEHYDROGENASE	RHODOCOCCUS ERYTHROPOLIS	X-RAY	2	PG4
4qck	3-KETOSTEROID-9-ALPHA-MONOOXYGENASE OXYGENASE SUBUNIT	MYCOBACTERIUM TUBERCULOSIS	X-RAY	2.46	ASD
4at2	3-KETOSTEROID-DELTA4-5ALPHA-DEHYDROGENASE	RHODOCOCCUS JOSTII	X-RAY	1.6	FAD
4jgt	3-MERCAPTOPYRUVATE SULFURTRANSFERASE	HOMO SAPIENS	X-RAY	2.16	PYR
6hto	3-METHYL-2-INDOLIC ACID SYNTHASE	STREPTOMYCES ACTUOSUS	X-RAY	1.45	5AD
3ez4	3-METHYL-2-OXOBUTANOATE HYDROXYMETHYLTRANSFERASE	BURKHOLDERIA PSEUDOMALLEI	X-RAY	2.1	TRS
1m3u	3-METHYL-2-OXOBUTANOATE HYDROXYMETHYLTRANSFERASE	ESCHERICHIA COLI	X-RAY	1.8	KPL
1o68	3-METHYL-2-OXOBUTANOATE HYDROXYMETHYLTRANSFERASE	NEISSERIA MENINGITIDIS SEROGROUP B	X-RAY	2.1	KIV
1pu6	3-METHYLADENINE DNA GLYCOSYLASE	HELICOBACTER PYLORI	X-RAY	1.64	BME
2ofk	3-METHYLADENINE DNA GLYCOSYLASE I, CONSTITUTIVE	SALMONELLA TYPHI	X-RAY	1.5	PGE
1mpg	3-METHYLADENINE DNA GLYCOSYLASE II	ESCHERICHIA COLI	X-RAY	1.8	GOL
2jhn	3-METHYLADENINE DNA-GLYCOSYLASE	ARCHAEOGLOBUS FULGIDUS	X-RAY	1.8	GOL
1kkr	3-METHYLASPARTATE AMMONIA-LYASE	CITROBACTER AMALONATICUS	X-RAY	2.1	2AS
4rhe	3-OCTAPRENYL-4-HYDROXYBENZOATE CARBOXY-LYASE	COLWELLIA PSYCHRERYTHRAEA 34H	X-RAY	2	FMN
5m1d	3-OCTAPRENYL-4-HYDROXYBENZOATE CARBOXY-LYASE	ESCHERICHIA COLI	X-RAY	2.7	4LU
5m1e	3-OCTAPRENYL-4-HYDROXYBENZOATE CARBOXY-LYASE	ESCHERICHIA COLI O6:H1 (STRAIN CFT073 / ATCC	X-RAY	2.62	7D9
3buv	3-OXO-5-BETA-STEROID 4-DEHYDROGENASE	HOMO SAPIENS	X-RAY	1.35	NAP
3buva	3-OXO-5-BETA-STEROID 4-DEHYDROGENASE	HOMO SAPIENS	X-RAY	1.35	EPE
6el3	3-OXO-DELTA(4,5)-STEROID 5-BETA-REDUCTASE	ARABIDOPSIS THALIANA	X-RAY	1.9	NAP
1w0i	3-OXOACYL CARRIER PROTEIN SYNTHASE	ARABIDOPSIS THALIANA	X-RAY	2.1	K
1o5i	3-OXOACYL-(ACYL CARRIER PROTEIN) REDUCTASE	THERMOTOGA MARITIMA	X-RAY	2.5	NAD
4one	3-OXOACYL-(ACYL-CARRIER PROTEIN) REDUCTASE	BRUCELLA MELITENSIS	X-RAY	1.65	MPD
3nug	3-OXOACYL-(ACYL-CARRIER PROTEIN) REDUCTASE	MESORHIZOBIUM LOTI	X-RAY	1.79	NAD
4efi	3-OXOACYL-(ACYL-CARRIER PROTEIN) SYNTHASE	BURKHOLDERIA XENOVORANS	X-RAY	1.35	FMT
1j3n	3-OXOACYL-(ACYL-CARRIER PROTEIN) SYNTHASE II	THERMUS THERMOPHILUS	X-RAY	2	CIT
4imr	3-OXOACYL-(ACYL-CARRIER-PROTEIN) REDUCTASE	AGROBACTERIUM FABRUM	X-RAY	1.96	NAP
4imra	3-OXOACYL-(ACYL-CARRIER-PROTEIN) REDUCTASE	AGROBACTERIUM FABRUM	X-RAY	1.96	UNL
4nbu	3-OXOACYL-(ACYL-CARRIER-PROTEIN) REDUCTASE	BACILLUS SP. SG-1	X-RAY	1.34	CAA
4nbua	3-OXOACYL-(ACYL-CARRIER-PROTEIN) REDUCTASE	BACILLUS SP. SG-1	X-RAY	1.34	NAI
5bt9	3-OXOACYL-(ACYL-CARRIER-PROTEIN) REDUCTASE	BRUCELLA CANIS (STRAIN ATCC 23365 / NCTC	X-RAY	1.5	NAP
3v1u	3-OXOACYL-(ACYL-CARRIER-PROTEIN) REDUCTASE	MYCOBACTERIUM TUBERCULOSIS	X-RAY	2.5	NAD
3v1ua	3-OXOACYL-(ACYL-CARRIER-PROTEIN) REDUCTASE	MYCOBACTERIUM TUBERCULOSIS	X-RAY	2.5	HXC
3sj7	3-OXOACYL-(ACYL-CARRIER-PROTEIN) REDUCTASE	STAPHYLOCOCCUS AUREUS SUBSP. AUREUS	X-RAY	2.5	NDP
3sj7a	3-OXOACYL-(ACYL-CARRIER-PROTEIN) REDUCTASE	STAPHYLOCOCCUS AUREUS SUBSP. AUREUS	X-RAY	2.5	PG4
3s21	3-OXOACYL-[ACP] SYNTHASE III	XANTHOMONAS CAMPESTRIS PV. CAMPESTRIS	X-RAY	1.7	CER
4gvx	3-OXOACYL-[ACYL-CARRIER PROTEIN] REDUCTASE	BURKHOLDERIA MULTIVORANS	X-RAY	1.5	FUL
4gvxa	3-OXOACYL-[ACYL-CARRIER PROTEIN] REDUCTASE	BURKHOLDERIA MULTIVORANS	X-RAY	1.5	NAP
1q7b	3-OXOACYL-[ACYL-CARRIER PROTEIN] REDUCTASE	ESCHERICHIA COLI	X-RAY	2.05	NAP
4wk6	3-OXOACYL-[ACYL-CARRIER PROTEIN] REDUCTASE	VIBRIO CHOLERAE 12129(1)	X-RAY	2.21	NDP
3op4	3-OXOACYL-[ACYL-CARRIER PROTEIN] REDUCTASE	VIBRIO CHOLERAE O1 BIOVAR EL TOR	X-RAY	1.6	NAP
5yo9	3-OXOACYL-[ACYL-CARRIER-(ACP)] SYNTHASE III C TERMINAL	ACINETOBACTER BAUMANNII	X-RAY	2	COA
5yo9a	3-OXOACYL-[ACYL-CARRIER-(ACP)] SYNTHASE III C TERMINAL	ACINETOBACTER BAUMANNII	X-RAY	2	GOL
4nbt	3-OXOACYL-[ACYL-CARRIER-PROTEIN] REDUCTASE	ACHOLEPLASMA LAIDLAWII	X-RAY	1.48	NAD
5b1y	3-OXOACYL-[ACYL-CARRIER-PROTEIN] REDUCTASE	AEROPYRUM PERNIX (STRAIN ATCC 700893 / DSM	X-RAY	2.09	NDP
2pnf	3-OXOACYL-[ACYL-CARRIER-PROTEIN] REDUCTASE	AQUIFEX AEOLICUS	X-RAY	1.8	1PE
6ci9	3-OXOACYL-[ACYL-CARRIER-PROTEIN] REDUCTASE	MYCOBACTERIUM SMEGMATIS (STRAIN ATCC 700084 /	X-RAY	1.9	NAP
4fda	3-OXOACYL-[ACYL-CARRIER-PROTEIN] REDUCTASE	SACCHAROMYCES CEREVISIAE	X-RAY	2.1	NAP
4dry	3-OXOACYL-[ACYL-CARRIER-PROTEIN] REDUCTASE	SINORHIZOBIUM MELILOTI	X-RAY	2.5	SO4
3osu	3-OXOACYL-[ACYL-CARRIER-PROTEIN] REDUCTASE	STAPHYLOCOCCUS AUREUS SUBSP. AUREUS MU50	X-RAY	1.9	PEG
4dmm	3-OXOACYL-[ACYL-CARRIER-PROTEIN] REDUCTASE	SYNECHOCOCCUS ELONGATUS	X-RAY	2.38	NAP
5ovk	3-OXOACYL-[ACYL-CARRIER-PROTEIN] REDUCTASE FABG	MYCOBACTERIUM SMEGMATIS (STRAIN ATCC 700084 /	X-RAY	1.45	NDP
4i08	3-OXOACYL-[ACYL-CARRIER-PROTEIN] REDUCTASE FABG	VIBRIO CHOLERAE O1	X-RAY	2.06	NDP
4bnv	3-OXOACYL-[ACYL-CARRIER-PROTEIN] REDUCTASE FABG	PSEUDOMONAS AERUGINOSA	X-RAY	2.5	Q7U
2ix4	3-OXOACYL-[ACYL-CARRIER-PROTEIN] SYNTHASE	ARABIDOPSIS THALIANA	X-RAY	1.95	6NA
2iwz	3-OXOACYL-[ACYL-CARRIER-PROTEIN] SYNTHASE	HOMO SAPIENS	X-RAY	1.65	6NA
2wat	3-OXOACYL-[ACYL-CARRIER-PROTEIN] SYNTHASE	SACCHAROMYCES CEREVISIAE	X-RAY	2.2	COA
2vba	3-OXOACYL-[ACYL-CARRIER-PROTEIN] SYNTHASE 1	ESCHERICHIA COLI	X-RAY	1.36	P4T
4c6z	3-OXOACYL-[ACYL-CARRIER-PROTEIN] SYNTHASE 1	MYCOBACTERIUM TUBERCULOSIS	X-RAY	1.8	M7U
4c6za	3-OXOACYL-[ACYL-CARRIER-PROTEIN] SYNTHASE 1	MYCOBACTERIUM TUBERCULOSIS	X-RAY	1.8	TLE
5ld8	3-OXOACYL-[ACYL-CARRIER-PROTEIN] SYNTHASE 1	MYCOBACTERIUM TUBERCULOSIS (STRAIN ATCC 25618 /	X-RAY	2.13	6U5
4c6w	3-OXOACYL-[ACYL-CARRIER-PROTEIN] SYNTHASE 1	MYCOBACTERIUM TUBERCULOSIS H37RV	X-RAY	1.7	M7U
4ls7	3-OXOACYL-[ACYL-CARRIER-PROTEIN] SYNTHASE 2	BACILLUS SUBTILIS SUBSP. SUBTILIS	X-RAY	1.67	1X9
4f32	3-OXOACYL-[ACYL-CARRIER-PROTEIN] SYNTHASE 2	BURKHOLDERIA VIETNAMIENSIS	X-RAY	1.9	N32
3ho9	3-OXOACYL-[ACYL-CARRIER-PROTEIN] SYNTHASE 2	ESCHERICHIA COLI	X-RAY	1.9	N3A
4jpf	3-OXOACYL-[ACYL-CARRIER-PROTEIN] SYNTHASE 2	PSEUDOMONAS AERUGINOSA	X-RAY	1.67	1LR
4dfe	3-OXOACYL-[ACYL-CARRIER-PROTEIN] SYNTHASE 3	BURKHOLDERIA XENOVORANS	X-RAY	2.35	EDO
3il6	3-OXOACYL-[ACYL-CARRIER-PROTEIN] SYNTHASE 3	ENTEROCOCCUS FAECALIS	X-RAY	2.5	B83
5bnm	3-OXOACYL-[ACYL-CARRIER-PROTEIN] SYNTHASE 3	ESCHERICHIA COLI	X-RAY	1.7	4VK
2qo0	3-OXOACYL-[ACYL-CARRIER-PROTEIN] SYNTHASE 3	MYCOBACTERIUM TUBERCULOSIS	X-RAY	1.85	D1T
5dwz	3-OXOACYL-[ACYL-CARRIER-PROTEIN] SYNTHASE 3	PSEUDOMONAS AERUGINOSA	X-RAY	2.04	MPO
5bqs	3-OXOACYL-[ACYL-CARRIER-PROTEIN] SYNTHASE 3	STREPTOCOCCUS PNEUMONIAE	X-RAY	1.9	4VN
4nhd	3-OXOACYL-[ACYL-CARRIER-PROTEIN] SYNTHASE 3 PROTEIN 1	VIBRIO CHOLERAE O1 BIOVAR EL TOR	X-RAY	1.78	COA
4x9k	3-OXOACYL-[ACYL-CARRIER-PROTEIN] SYNTHASE 3 PROTEIN 2	VIBRIO CHOLERAE SEROTYPE O1	X-RAY	1.61	MLI
4x9ka	3-OXOACYL-[ACYL-CARRIER-PROTEIN] SYNTHASE 3 PROTEIN 2	VIBRIO CHOLERAE SEROTYPE O1	X-RAY	1.61	GOL
5kp2	3-OXOACYL-[ACYL-CARRIER-PROTEIN] SYNTHASE 3 PROTEIN 2	VIBRIO CHOLERAE SEROTYPE O1 (STRAIN ATCC 39315	X-RAY	2	COA
5kp2a	3-OXOACYL-[ACYL-CARRIER-PROTEIN] SYNTHASE 3 PROTEIN 2	VIBRIO CHOLERAE SEROTYPE O1 (STRAIN ATCC 39315	X-RAY	2	OCA
1mzs	3-OXOACYL-[ACYL-CARRIER-PROTEIN] SYNTHASE III	ESCHERICHIA COLI	X-RAY	2.1	669
1hzp	3-OXOACYL-[ACYL-CARRIER-PROTEIN] SYNTHASE III	MYCOBACTERIUM TUBERCULOSIS	X-RAY	2.1	DAO
5thq	3-OXOACYL-ACP REDUCTASE	UNCULTURED BACTERIUM	X-RAY	2.3	NDP
3led	3-OXOACYL-ACYL CARRIER PROTEIN SYNTHASE III	RHODOPSEUDOMONAS PALUSTRIS	X-RAY	1.45	FMT
2xua	3-OXOADIPATE ENOL-LACTONASE	BURKHOLDERIA XENOVORANS	X-RAY	1.9	SHF
1php	3-PHOSPHOGLYCERATE KINASE	GEOBACILLUS STEAROTHERMOPHILUS	X-RAY	1.65	ADP
1qpg	3-PHOSPHOGLYCERATE KINASE	SACCHAROMYCES CEREVISIAE	X-RAY	2.4	3PG
1qpga	3-PHOSPHOGLYCERATE KINASE	SACCHAROMYCES CEREVISIAE	X-RAY	2.4	MAP
16pk	3-PHOSPHOGLYCERATE KINASE	TRYPANOSOMA BRUCEI	X-RAY	1.6	BIS
1w1g	3-PHOSPHOINOSITIDE DEPENDENT PROTEIN KINASE-1	HOMO SAPIENS	X-RAY	1.45	4PT
1uu9	3-PHOSPHOINOSITIDE DEPENDENT PROTEIN KINASE-1	SPODOPTERA FRUGIPERDA	X-RAY	1.95	BI3
5lvo	3-PHOSPHOINOSITIDE-DEPENDENT PROTEIN KINASE 1	HOMO SAPIENS	X-RAY	1.09	ATP
5lvoa	3-PHOSPHOINOSITIDE-DEPENDENT PROTEIN KINASE 1	HOMO SAPIENS	X-RAY	1.09	78W
2pqc	3-PHOSPHOSHIKIMATE 1-CARBOXYVINYLTRANSFERASE	AGROBACTERIUM SP.	X-RAY	1.6	RC1
3slh	3-PHOSPHOSHIKIMATE 1-CARBOXYVINYLTRANSFERASE	COXIELLA BURNETII	X-RAY	1.7	GPJ
3slha	3-PHOSPHOSHIKIMATE 1-CARBOXYVINYLTRANSFERASE	COXIELLA BURNETII	X-RAY	1.7	S3P
4znd	3-PHOSPHOSHIKIMATE 1-CARBOXYVINYLTRANSFERASE	COXIELLA BURNETII (STRAIN RSA 493 / NINE MILE	X-RAY	2.55	S3P
2aa9	3-PHOSPHOSHIKIMATE 1-CARBOXYVINYLTRANSFERASE	ESCHERICHIA COLI	X-RAY	1.5	SKM
3fk1	3-PHOSPHOSHIKIMATE 1-CARBOXYVINYLTRANSFERASE	ESCHERICHIA COLI K-12	X-RAY	1.7	S3P
3fk1a	3-PHOSPHOSHIKIMATE 1-CARBOXYVINYLTRANSFERASE	ESCHERICHIA COLI K-12	X-RAY	1.7	GPF
2o0b	3-PHOSPHOSHIKIMATE 1-CARBOXYVINYLTRANSFERASE	MYCOBACTERIUM TUBERCULOSIS	X-RAY	1.15	S3P
3nvs	3-PHOSPHOSHIKIMATE 1-CARBOXYVINYLTRANSFERASE	VIBRIO CHOLERAE	X-RAY	1.02	GPJ
3nvsa	3-PHOSPHOSHIKIMATE 1-CARBOXYVINYLTRANSFERASE	VIBRIO CHOLERAE	X-RAY	1.02	S3P
3amr	3-PHYTASE	BACILLUS SUBTILIS	X-RAY	1.25	IHS
1skb	3-PHYTASE A	ASPERGILLUS FUMIGATUS	X-RAY	1.58	NAG
3k4q	3-PHYTASE A	ASPERGILLUS NIGER	X-RAY	2.2	IHS
6h6x	3-POLYPRENYL-4-HYDROXYBENZOATE DECARBOXYLASE AND RELATED	PELOTOMACULUM THERMOPROPIONICUM (STRAIN DSM	X-RAY	2.25	4LU
4zdf	3,2-TRANS-ENOYL-COA ISOMERASE	SACCHAROMYCES CEREVISIAE	X-RAY	1.81	GOL
4zdb	3,2-TRANS-ENOYL-COA ISOMERASE	SACCHAROMYCES CEREVISIAE (STRAIN ATCC 204508 /	X-RAY	2.14	CAA
1sg4	3,2-TRANS-ENOYL-COA ISOMERASE, MITOCHONDRIAL	HOMO SAPIENS	X-RAY	1.3	CO8
1xx4	3,2-TRANS-ENOYL-COA ISOMERASE, MITOCHONDRIAL	RATTUS NORVEGICUS	X-RAY	2.2	BAM
1tku	3,4-DIHYDROXY-2-BUTANONE 4-PHOSPHATE SYNTHASE	CANDIDA ALBICANS	X-RAY	1.66	5RP
1k4o	3,4-DIHYDROXY-2-BUTANONE 4-PHOSPHATE SYNTHASE	MAGNAPORTHE GRISEA	X-RAY	1.1	GOL
1snn	3,4-DIHYDROXY-2-BUTANONE 4-PHOSPHATE SYNTHASE	METHANOCALDOCOCCUS JANNASCHII	X-RAY	1.55	5RP
3mio	3,4-DIHYDROXY-2-BUTANONE 4-PHOSPHATE SYNTHASE	MYCOBACTERIUM TUBERCULOSIS	X-RAY	1.8	GOL
3lqu	3,4-DIHYDROXY-2-BUTANONE 4-PHOSPHATE SYNTHASE	SALMONELLA TYPHIMURIUM	X-RAY	2.52	5SP
4p6p	3,4-DIHYDROXY-2-BUTANONE 4-PHOSPHATE SYNTHASE	VIBRIO CHOLERAE SEROTYPE O1	X-RAY	1.86	RES
5o3n	3,4-DIHYDROXYBENZOATE DECARBOXYLASE	ENTEROBACTER CLOACAE	X-RAY	2.05	4LU
5xd7	3,6-ANHYDRO-ALPHA-L-GALACTONATE CYCLOISOMERASE	VIBRIO SP. (STRAIN EJY3)	X-RAY	2.2	ACY
4uwm	3,6-DIKETOCAMPHANE 1,6 MONOOXYGENASE	PSEUDOMONAS PUTIDA	X-RAY	1.9	PGE
4uwma	3,6-DIKETOCAMPHANE 1,6 MONOOXYGENASE	PSEUDOMONAS PUTIDA	X-RAY	1.9	FMN
2efj	3,7-DIMETHYLXANTHINE METHYLTRANSFERASE	COFFEA CANEPHORA	X-RAY	2	SAH
2efja	3,7-DIMETHYLXANTHINE METHYLTRANSFERASE	COFFEA CANEPHORA	X-RAY	2	37T
5i49	3' TERMINAL URIDYLYL TRANSFERASE	TRYPANOSOMA BRUCEI	X-RAY	1.8	2KH
1w0h	3'-5' EXONUCLEASE ERI1	HOMO SAPIENS	X-RAY	1.59	AMP
4oke	3'-5' EXORIBONUCLEASE RV2179C/MT2234.1	MYCOBACTERIUM TUBERCULOSIS	X-RAY	1.7	AMP
5djh	3'-PHOSPHOADENOSINE 5'-PHOSPHATE PHOSPHATASE	MYCOBACTERIUM TUBERCULOSIS	X-RAY	1.45	AMP
1qgx	3',5'-ADENOSINE BISPHOSPHATASE	SACCHAROMYCES CEREVISIAE	X-RAY	1.6	AMP
1mc0	3',5'-CYCLIC NUCLEOTIDE PHOSPHODIESTERASE 2A	MUS MUSCULUS	X-RAY	2.86	PCG
4ojx	3',5'-CYCLIC-NUCLEOTIDE PHOSPHODIESTERASE 1	SACCHAROMYCES CEREVISIAE	X-RAY	1.31	MPD
4ojxa	3',5'-CYCLIC-NUCLEOTIDE PHOSPHODIESTERASE 1	SACCHAROMYCES CEREVISIAE	X-RAY	1.31	G
1jp4	3'(2'),5'-BISPHOSPHATE NUCLEOTIDASE	RATTUS NORVEGICUS	X-RAY	1.69	AMP
4hxv	3'(2'),5'-BISPHOSPHATE NUCLEOTIDASE, PUTATIVE	ENTAMOEBA HISTOLYTICA	X-RAY	2.6	AMP
2wef	3'(2')\, 5'-BISPHOSPHATE NUCLEOTIDASE 1	HOMO SAPIENS	X-RAY	1.8	AMP
2ipg	3(17)ALPHA-HYDROXYSTEROID DEHYDROGENASE	MUS MUSCULUS	X-RAY	1.9	FFA
2ipga	3(17)ALPHA-HYDROXYSTEROID DEHYDROGENASE	MUS MUSCULUS	X-RAY	1.9	NAP
3ain	303AA LONG HYPOTHETICAL ESTERASE	SULFOLOBUS TOKODAII	X-RAY	1.65	MPD
4pc4	30K LIPOPROTEIN	BOMBYX MORI	X-RAY	1.8	MES
4iy8	30K PROTEIN 1	BOMBYX MORI	X-RAY	2.36	P6G
4efp	30KDA PROTEIN	BOMBYX MORI	X-RAY	1.33	PEG
4efpa	30KDA PROTEIN	BOMBYX MORI	X-RAY	1.33	PGE
3k8g	30KLP	TREPONEMA PALLIDUM	X-RAY	1.95	MPD
1ml5	30S 16S RIBOSOMAL RNA	ESCHERICHIA COLI	ELECTRON	14	YG
1jgq	30S 16S RIBOSOMAL RNA	THERMUS THERMOPHILUS	X-RAY	5	YG
4xb1	319AA LONG HYPOTHETICAL HOMOSERINE DEHYDROGENASE	PYROCOCCUS HORIKOSHII OT3	X-RAY	2.3	NDP
1njr	32.1 KDA PROTEIN IN ADH3-RCA1 INTERGENIC REGION	SACCHAROMYCES CEREVISIAE	X-RAY	1.9	XYL
2df8	325AA LONG HYPOTHETICAL PROTEIN	PYROCOCCUS HORIKOSHII	X-RAY	1.5	F1P
1vq0	33 KDA CHAPERONIN	THERMOTOGA MARITIMA	X-RAY	2.2	UNL
2ch8	33 KDA EARLY PROTEIN	EPSTEIN-BARR VIRUS	X-RAY	2.3	NAG
2is2	33-MER	ESCHERICHIA COLI	X-RAY	3	GOL
2hun	336AA LONG HYPOTHETICAL DTDP-GLUCOSE 4,6-DEHYDRATASE	PYROCOCCUS HORIKOSHII	X-RAY	2.07	NAD
1d0l	35KD SOLUBLE LYTIC TRANSGLYCOSYLASE	ESCHERICHIA COLI	X-RAY	1.97	BLG
1ltm	36 KDA SOLUBLE LYTIC TRANSGLYCOSYLASE	ESCHERICHIA COLI	X-RAY	1.7	BCN
1ue8	367AA LONG HYPOTHETICAL CYTOCHROME P450	SULFOLOBUS TOKODAII	X-RAY	3	HEM
1vgm	378AA LONG HYPOTHETICAL CITRATE SYNTHASE	SULFOLOBUS TOKODAII	X-RAY	2	GOL
1umg	385AA LONG CONSERVED HYPOTHETICAL PROTEIN	SULFOLOBUS TOKODAII STR. 7	X-RAY	1.8	2FP
2dr1	386AA LONG HYPOTHETICAL SERINE AMINOTRANSFERASE	PYROCOCCUS HORIKOSHII	X-RAY	1.9	PLP
5zve	389AA LONG HYPOTHETICAL NUCLEOLAR PROTEIN	PYROCOCCUS HORIKOSHII (STRAIN ATCC 700860 / DSM	X-RAY	2.18	SAH
1j96	3ALPHA-HYDROXYSTEROID DEHYDROGENASE TYPE 3	HOMO SAPIENS	X-RAY	1.25	TES
1j96a	3ALPHA-HYDROXYSTEROID DEHYDROGENASE TYPE 3	HOMO SAPIENS	X-RAY	1.25	NAP
1fk8	3ALPHA-HYDROXYSTEROID DEHYDROGENASE/CARBONYL REDUCTASE	COMAMONAS TESTOSTERONI	X-RAY	1.95	NAD
4gw4	3BNC60 FAB LIGHT-CHAIN	HOMO SAPIENS	X-RAY	2.65	NAG
5hxf	3C PROTEASE	ENTEROVIRUS A71	X-RAY	1.39	AG7
3zva	3C PROTEASE	ENTEROVIRUS D68	X-RAY	2.2	G75
3sji	3C PROTEASE	HUMAN COXSACKIEVIRUS A16	X-RAY	1.8	AG7
3zvc	3C PROTEASE	HUMAN ENTEROVIRUS	X-RAY	2	G82
3sjo	3C PROTEASE	HUMAN ENTEROVIRUS 71	X-RAY	1.7	AG7
6ffn	3C PROTEASE	HUMAN RHINOVIRUS 2	X-RAY	1.75	D8K
5wq2	3C PROTEIN	ENTEROVIRUS A71	X-RAY	1.39	AG7
3qzr	3C PROTEIN	HUMAN ENTEROVIRUS 71	X-RAY	1.04	AG7
5c1u	3C PROTEINASE	ENTEROVIRUS A71	X-RAY	1.49	GHV
2zu3	3C PROTEINASE	HUMAN COXSACKIEVIRUS	X-RAY	1.75	ZU3
2ztx	3C PROTEINASE	HUMAN COXSACKIEVIRUS B3	X-RAY	1.72	DTZ
4ght	3C PROTEINASE	HUMAN ENTEROVIRUS 71	X-RAY	1.96	AG7
2a5i	3C-LIKE PEPTIDASE	SARS CORONAVIRUS	X-RAY	1.88	AZP
1wqs	3C-LIKE PROTEASE	CHIBA VIRUS	X-RAY	2.8	TAL
3ur9	3C-LIKE PROTEASE	NOROVIRUS	X-RAY	1.65	K36
5dgj	3C-LIKE PROTEASE	NORWALK VIRUS	X-RAY	1	V64
4xbd	3C-LIKE PROTEASE	NORWALK VIRUS (STRAIN GI/HUMAN/UNITED	X-RAY	1.45	M40
4yoi	3C-LIKE PROTEINASE	BAT CORONAVIRUS HKU4	X-RAY	1.82	4F4
3tlo	3C-LIKE PROTEINASE	HUMAN CORONAVIRUS	X-RAY	1.6	GOL
5c5o	3C-LIKE PROTEINASE	HUMAN SARS CORONAVIRUS	X-RAY	1.5	SDJ
4f49	3C-LIKE PROTEINASE	PORCINE TRANSMISSIBLE GASTROENTERITIS	X-RAY	2.25	K36
4mds	3C-LIKE PROTEINASE	SARS CORONAVIRUS	X-RAY	1.6	23H
2amp	3C-LIKE PROTEINASE	TRANSMISSIBLE GASTROENTERITIS VIRUS	X-RAY	2.7	I12
2yna	3C-LIKE PROTEINASE	TYLONYCTERIS BAT CORONAVIRUS HKU4	X-RAY	1.5	IMD
5w5z	3C10 FAB LIGHT CHAIN	HOMO SAPIENS	X-RAY	2	MES
5lak	3CL PROTEASE	SYNTHETIC CONSTRUCT	X-RAY	2.3	1PE
4y34	3D POLYMERASE	COXSACKIEVIRUS B3	X-RAY	2.7	45Z
5n95	3D POLYMERASE	FOOT-AND-MOUTH DISEASE VIRUS	X-RAY	2.6	3PO
3koa	3D POLYMERASE	FOOT-AND-MOUTH DISEASE VIRUS - TYPE C	X-RAY	2.4	DPO
4ong	3D6 FAB ANTIBODY HEAVY CHAIN	HOMO SAPIENS	X-RAY	2.2	IMD
5mad	3G61	AEQUOREA VICTORIA	X-RAY	1.53	PEG
5xbp	3NT OXYGENASE ALPHA SUBUNIT	DIAPHOROBACTER SP. DS2	X-RAY	2.9	FES
1flr	4-4-20 (IG*G2A=KAPPA=) FAB FRAGMENT	MUS MUSCULUS	X-RAY	1.85	FLU
1tz7	4-ALPHA-GLUCANOTRANSFERASE	AQUIFEX AEOLICUS	X-RAY	2.15	MPD
5b68	4-ALPHA-GLUCANOTRANSFERASE	CORYNEBACTERIUM GLUTAMICUM	X-RAY	1.7	BTB
4s3r	4-ALPHA-GLUCANOTRANSFERASE	ESCHERICHIA COLI K-12	X-RAY	2.1	7SA
1k1y	4-ALPHA-GLUCANOTRANSFERASE	THERMOCOCCUS LITORALIS	X-RAY	2.4	ACR
1lwj	4-ALPHA-GLUCANOTRANSFERASE	THERMOTOGA MARITIMA	X-RAY	2.5	ACG
5jiw	4-ALPHA-GLUCANOTRANSFERASE	THERMUS AQUATICUS	X-RAY	1.73	GLC
2x1i	4-ALPHA-GLUCANOTRANSFERASE	THERMUS BROCKIANUS	X-RAY	2.36	INS
2owc	4-ALPHA-GLUCANOTRANSFERASE	THERMUS THERMOPHILUS	X-RAY	2.05	ACR
5cps	4-ALPHA-GLUCANOTRANSFERASE DPE1,	ARABIDOPSIS THALIANA	X-RAY	1.8	GLC
5ezm	4-AMINO-4-DEOXY-L-ARABINOSE TRANSFERASE OR RELATED	CUPRIAVIDUS METALLIDURANS (STRAIN ATCC 43123 /	X-RAY	2.7	PC
5ezma	4-AMINO-4-DEOXY-L-ARABINOSE TRANSFERASE OR RELATED	CUPRIAVIDUS METALLIDURANS (STRAIN ATCC 43123 /	X-RAY	2.7	DSL
1i2k	4-AMINO-4-DEOXYCHORISMATE LYASE	ESCHERICHIA COLI	X-RAY	1.79	PLP
2y4r	4-AMINO-4-DEOXYCHORISMATE LYASE	PSEUDOMONAS AERUGINOSA	X-RAY	1.75	PLP
5kqt	4-AMINOBURYRATE TRANSAMINASE	PSEUDOMONAS SP. AAC	X-RAY	1.99	PLP
1sff	4-AMINOBUTYRATE AMINOTRANSFERASE	ESCHERICHIA COLI	X-RAY	1.9	IK2
1ohv	4-AMINOBUTYRATE AMINOTRANSFERASE	SUS SCROFA	X-RAY	2.3	PLP
4ffc	4-AMINOBUTYRATE AMINOTRANSFERASE (GABT)	MYCOBACTERIUM ABSCESSUS	X-RAY	1.8	EDO
4y0h	4-AMINOBUTYRATE AMINOTRANSFERASE, MITOCHONDRIAL	SUS SCROFA	X-RAY	1.63	PLP
4atq	4-AMINOBUTYRATE TRANSAMINASE	ARTHROBACTER AURESCENS	X-RAY	2.75	PLP
3oks	4-AMINOBUTYRATE TRANSAMINASE	MYCOBACTERIUM SMEGMATIS	X-RAY	1.8	FMT
5kr3	4-AMINOBUTYRATE TRANSAMINASE	PSEUDOMONAS	X-RAY	1.95	PLP
3noj	4-CARBOXY-4-HYDROXY-2-OXOADIPATE ALDOLASE/OXALOACETATE	PSEUDOMONAS PUTIDA	X-RAY	1.82	PYR
2qvz	4-CHLOROBENZOATE COA LIGASE/SYNTHETASE	ALCALIGENES SP.	X-RAY	2.5	3BZ
3cw9	4-CHLOROBENZOYL COA LIGASE	ALCALIGENES SP.	X-RAY	2	AMP
3cw9a	4-CHLOROBENZOYL COA LIGASE	ALCALIGENES SP.	X-RAY	2	01A
1t5d	4-CHLOROBENZOYL COA LIGASE	ALCALIGENES SP. AL3007	X-RAY	2.21	174
1nzy	4-CHLOROBENZOYL COENZYME A DEHALOGENASE	PSEUDOMONAS SP. CBS3	X-RAY	1.8	BCA
3a9v	4-COUMARATE--COA LIGASE	POPULUS TOMENTOSA	X-RAY	2.5	AMP
5bsr	4-COUMARATE--COA LIGASE 2	NICOTIANA TABACUM	X-RAY	1.5	COA
5bsra	4-COUMARATE--COA LIGASE 2	NICOTIANA TABACUM	X-RAY	1.5	AMP
3ni2	4-COUMARATE:COA LIGASE	POPULUS TOMENTOSA	X-RAY	1.9	AYL
1wve	4-CRESOL DEHYDROGENASE [HYDROXYLATING]	PSEUDOMONAS PUTIDA	X-RAY	1.85	ACY
2po3	4-DEHYDRASE	STREPTOMYCES VENEZUELAE	X-RAY	2.1	T4K
1xru	4-DEOXY-L-THREO-5-HEXOSULOSE-URONATE KETOL-ISOMERASE	ESCHERICHIA COLI	X-RAY	1.94	1PE
2v8p	4-DIPHOSPHOCYTIDYL-2-C-METHYL-D-ERYTHRITOL	AQUIFEX AEOLICUS	X-RAY	2.1	CDP
2v8pa	4-DIPHOSPHOCYTIDYL-2-C-METHYL-D-ERYTHRITOL	AQUIFEX AEOLICUS	X-RAY	2.1	ADP
1oj4	4-DIPHOSPHOCYTIDYL-2-C-METHYL-D-ERYTHRITOL	ESCHERICHIA COLI	X-RAY	2.01	ANP
1oj4a	4-DIPHOSPHOCYTIDYL-2-C-METHYL-D-ERYTHRITOL	ESCHERICHIA COLI	X-RAY	2.01	CDM
4ed4	4-DIPHOSPHOCYTIDYL-2-C-METHYL-D-ERYTHRITOL KINASE	MYCOBACTERIUM ABSCESSUS	X-RAY	1.75	ATP
3pyf	4-DIPHOSPHOCYTIDYL-2-C-METHYL-D-ERYTHRITOL KINASE	MYCOBACTERIUM TUBERCULOSIS	X-RAY	1.7	ANP
1i52	4-DIPHOSPHOCYTIDYL-2-C-METHYLERYTHRITOL SYNTHASE	ESCHERICHIA COLI	X-RAY	1.5	CTP
2vf3	4-DIPHOSPHOCYTIDYL-2C-METHYL-D-ERYTHRITOL KINASE	AQUIFEX AEOLICUS	X-RAY	2.2	GVS
2ww4	4-DIPHOSPHOCYTIDYL-2C-METHYL-D-ERYTHRITOL KINASE	ESCHERICHIA COLI	X-RAY	2	ADP
4b5s	4-HYDROXY-2-OXO-HEPTANE-1,7-DIOATE ALDOLASE	ESCHERICHIA COLI ATCC 8739	X-RAY	1.68	PYR
3s5o	4-HYDROXY-2-OXOGLUTARATE ALDOLASE, MITOCHONDRIAL	HOMO SAPIENS	X-RAY	1.97	EDO
4jn6	4-HYDROXY-2-OXOVALERATE ALDOLASE	MYCOBACTERIUM TUBERCULOSIS	X-RAY	1.93	OXL
1nvm	4-HYDROXY-2-OXOVALERATE ALDOLASE	PSEUDOMONAS SP.	X-RAY	1.7	NAD
4lrt	4-HYDROXY-2-OXOVALERATE ALDOLASE	THERMOMONOSPORA CURVATA	X-RAY	1.5	COA
4mwa	4-HYDROXY-3-METHYLBUT-2-EN-1-YL DIPHOSPHATE SYNTHASE	BACILLUS ANTHRACIS	X-RAY	1.85	SO4
4s39	4-HYDROXY-3-METHYLBUT-2-EN-1-YL DIPHOSPHATE SYNTHASE	THERMUS THERMOPHILUS	X-RAY	1.3	H6P
3dnf	4-HYDROXY-3-METHYLBUT-2-ENYL DIPHOSPHATE REDUCTASE	AQUIFEX AEOLICUS	X-RAY	1.65	F3S
4h4d	4-HYDROXY-3-METHYLBUT-2-ENYL DIPHOSPHATE REDUCTASE	ESCHERICHIA COLI	X-RAY	1.35	10E
5ees	4-HYDROXY-TETRAHYDRODIPICOLINATE REDUCTASE	CORYNEBACTERIUM GLUTAMICUM (STRAIN ATCC 13032 /	X-RAY	2.15	NAP
5wol	4-HYDROXY-TETRAHYDRODIPICOLINATE REDUCTASE	COXIELLA BURNETII (STRAIN RSA 493 / NINE MILE	X-RAY	1.7	NAP
5tjz	4-HYDROXY-TETRAHYDRODIPICOLINATE REDUCTASE	MYCOBACTERIUM TUBERCULOSIS (STRAIN ATCC 25177 /	X-RAY	1.5	NAP
4ywj	4-HYDROXY-TETRAHYDRODIPICOLINATE REDUCTASE	PSEUDOMONAS AERUGINOSA (STRAIN ATCC 15692 /	X-RAY	1.8	NAD
5tem	4-HYDROXY-TETRAHYDRODIPICOLINATE REDUCTASE	VIBRIO VULNIFICUS	X-RAY	2.2	NAD
5f1v	4-HYDROXY-TETRAHYDRODIPICOLINATE SYNTHASE	CAMPYLOBACTER JEJUNI	X-RAY	2.2	3VN
4ly8	4-HYDROXY-TETRAHYDRODIPICOLINATE SYNTHASE	CAMPYLOBACTER JEJUNI SUBSP. JEJUNI	X-RAY	1.7	GOL
6nva	4-HYDROXY-TETRAHYDRODIPICOLINATE SYNTHASE	ESCHERICHIA COLI	X-RAY	2.16	GOL
5t25	4-HYDROXY-TETRAHYDRODIPICOLINATE SYNTHASE	ESCHERICHIA COLI O8 (STRAIN IAI1)	X-RAY	1.99	LYS
5j5d	4-HYDROXY-TETRAHYDRODIPICOLINATE SYNTHASE	MYCOBACTERIUM TUBERCULOSIS H37RV	X-RAY	2.4	6GT
4pfm	4-HYDROXY-TETRAHYDRODIPICOLINATE SYNTHASE	SHEWANELLA BENTHICA KT99	X-RAY	2.33	LYS
4od5	4-HYDROXYBENZOATE OCTAPRENYLTRANSFERASE	AEROPYRUM PERNIX	X-RAY	3.56	GST
1rm6	4-HYDROXYBENZOYL-COA REDUCTASE ALPHA SUBUNIT	THAUERA AROMATICA	X-RAY	1.6	PCD
3r3d	4-HYDROXYBENZOYL-COA THIOESTERASE	ARTHROBACTER SP.	X-RAY	1.75	4CO
1lo7	4-HYDROXYBENZOYL-COA THIOESTERASE	PSEUDOMONAS SP. CBS3	X-RAY	1.5	4CO
3gk7	4-HYDROXYBUTYRATE COA-TRANSFERASE	CLOSTRIDIUM AMINOBUTYRICUM	X-RAY	1.85	SPD
2oas	4-HYDROXYBUTYRATE COENZYME A TRANSFERASE	SHEWANELLA ONEIDENSIS	X-RAY	2.4	COA
4n8i	4-HYDROXYBUTYRATE COENZYME A TRANSFERASE	YERSINIA PESTIS	X-RAY	2.01	COA
5gwt	4-HYDROXYISOLECUINE DEHYDROGENASE	BACILLUS THURINGIENSIS	X-RAY	1.9	NAD
5gwta	4-HYDROXYISOLECUINE DEHYDROGENASE	BACILLUS THURINGIENSIS	X-RAY	1.9	SIN
3cb0	4-HYDROXYPHENYLACETATE 3-MONOOXYGENASE	BRUCELLA MELITENSIS	X-RAY	1.6	FMN
2yaj	4-HYDROXYPHENYLACETATE DECARBOXYLASE LARGE SUBUNIT	CLOSTRIDIUM SCATOLOGENES	X-RAY	1.81	4HP
2yyj	4-HYDROXYPHENYLACETATE-3-HYDROXYLASE	THERMUS THERMOPHILUS	X-RAY	1.66	FAD
1tfz	4-HYDROXYPHENYLPYRUVATE DIOXYGENASE	ARABIDOPSIS THALIANA	X-RAY	1.8	869
3isq	4-HYDROXYPHENYLPYRUVATE DIOXYGENASE	HOMO SAPIENS	X-RAY	1.75	EDO
1cjx	4-HYDROXYPHENYLPYRUVATE DIOXYGENASE	PSEUDOMONAS FLUORESCENS	X-RAY	2.4	ACT
1t47	4-HYDROXYPHENYLPYRUVATE DIOXYGENASE	STREPTOMYCES AVERMITILIS	X-RAY	2.5	NTD
1sp8	4-HYDROXYPHENYLPYRUVATE DIOXYGENASE	ZEA MAYS	X-RAY	2	FE2
1sqi	4-HYDROXYPHENYLPYRUVIC ACID DIOXYGENASE	RATTUS NORVEGICUS	X-RAY	2.15	869
3zgj	4-HYDROXYPHENYLPYRUVIC ACID DIOXYGENASE	STREPTOMYCES COELICOLOR	X-RAY	1.95	RMN
3tsn	4-HYDROXYTHREONINE-4-PHOSPHATE DEHYDROGENASE	CAMPYLOBACTER JEJUNI SUBSP. JEJUNI	X-RAY	2.63	UNL
1ptm	4-HYDROXYTHREONINE-4-PHOSPHATE DEHYDROGENASE	ESCHERICHIA COLI	X-RAY	1.96	PO4
1yxo	4-HYDROXYTHREONINE-4-PHOSPHATE DEHYDROGENASE 1	PSEUDOMONAS AERUGINOSA	X-RAY	2.01	EOH
1r8k	4-HYDROXYTHREONINE-4-PHOSPHATE DEHYDROGENASE 1	SALMONELLA TYPHIMURIUM	X-RAY	2.1	SO4
2oof	4-IMIDAZOLONE-5-PROPANOATE AMIDOHYDROLASE	UNIDENTIFIED	X-RAY	2.2	FE
3dzv	4-METHYL-5-(BETA-HYDROXYETHYL)THIAZOLE KINASE	ENTEROCOCCUS FAECALIS	X-RAY	2.57	ADP
3hf5	4-METHYLMUCONOLACTONE METHYLISOMERASE	PSEUDOMONAS REINEKEI	X-RAY	1.4	3ML
3was	4-O-BETA-D-MANNOSYL-D-GLUCOSE PHOSPHORYLASE	BACTEROIDES FRAGILIS	X-RAY	1.5	BMA
5ayc	4-O-BETA-D-MANNOSYL-D-GLUCOSE PHOSPHORYLASE	RUMINOCOCCUS ALBUS (STRAIN ATCC 27210 / DSM	X-RAY	1.9	BMA
4g4j	4-O-METHYL-GLUCURONOYL METHYLESTERASE	MYCELIOPHTHORA THERMOPHILA	X-RAY	2.35	MCU
5d2k	4-OXALOCROTONATE DECARBOXYLASE NAHK	PSEUDOMONAS PUTIDA	X-RAY	1.57	OOG
1bjp	4-OXALOCROTONATE TAUTOMERASE	PSEUDOMONAS PUTIDA	X-RAY	2.4	OXP
2x4k	4-OXALOCROTONATE TAUTOMERASE	STAPHYLOCOCCUS AUREUS	X-RAY	1.1	ACT
6dxs	4-OXALOMESACONATE HYDRATASE	SPHINGOBIUM SP. SYK-6	X-RAY	1.65	HJ7
4prl	4-PHOSPHOERYTHRONATE DEHYDROGENASE	LACTOBACILLUS JENSENII	X-RAY	2.6	NAD
3wdm	4-PHOSPHOPANTOATE--BETA-ALANINE LIGASE	THERMOCOCCUS KODAKARENSIS	X-RAY	2	ADN
4keq	4-PYRIDOXOLACTONASE	MESORHIZOBIUM LOTI	X-RAY	2.28	5PN
4eql	4-SUBSTITUTED BENZOATES-GLUTAMATE LIGASE GH3.12	ARABIDOPSIS THALIANA	X-RAY	1.8	AMP
4eqla	4-SUBSTITUTED BENZOATES-GLUTAMATE LIGASE GH3.12	ARABIDOPSIS THALIANA	X-RAY	1.8	SAL
5jzb	4,5:9,10-DISECO-3-HYDROXY-5,9,17-TRIOXOANDROSTA-1(10),2-	MYCOBACTERIUM TUBERCULOSIS (STRAIN ATCC 25618 /	X-RAY	2.1	6OT
6ct5	4'-PHOSPHOPANTETHEINYL TRANSFERASE	MYCOBACTERIUM TUBERCULOSIS	X-RAY	1.76	COA
6ct5a	4'-PHOSPHOPANTETHEINYL TRANSFERASE	MYCOBACTERIUM TUBERCULOSIS	X-RAY	1.76	FD7
1qr0	4'-PHOSPHOPANTETHEINYL TRANSFERASE SFP	BACILLUS SUBTILIS	X-RAY	1.9	COA
2ggq	401AA LONG HYPOTHETICAL GLUCOSE-1-PHOSPHATE	SULFOLOBUS TOKODAII	X-RAY	2	TTP
2e5m	409AA LONG HYPOTHETICAL NADP-DEPENDENT ISOCITRATE	SULFOLOBUS TOKODAII STR. 7	X-RAY	2.4	NAP
4r16	418AA LONG HYPOTHETICAL UDP-N-ACETYL-D-MANNOSAMINURONIC	PYROCOCCUS HORIKOSHII OT3	X-RAY	1.55	SAJ
2eo5	419AA LONG HYPOTHETICAL AMINOTRANSFERASE	SULFOLOBUS TOKODAII	X-RAY	1.9	PLP
2nww	425AA LONG HYPOTHETICAL PROTON GLUTAMATE SYMPORT PROTEIN	PYROCOCCUS HORIKOSHII	X-RAY	3.2	TB1
6myy	426C DS-SOSIP D3	HOMO SAPIENS	ELECTRON	3.8	BMA
5i9q	426C.TM4DV1-3 P120	HOMO SAPIENS	X-RAY	3	NAG, BMA, MAN
3q6k	43.2 KDA SALIVARY PROTEIN	LUTZOMYIA LONGIPALPIS	X-RAY	2.52	SRO
2e0i	432AA LONG HYPOTHETICAL DEOXYRIBODIPYRIMIDINE PHOTOLYASE	SULFOLOBUS TOKODAII	X-RAY	2.8	FAD
2e0ia	432AA LONG HYPOTHETICAL DEOXYRIBODIPYRIMIDINE PHOTOLYASE	SULFOLOBUS TOKODAII	X-RAY	2.8	MPD
2dwc	433AA LONG HYPOTHETICAL PHOSPHORIBOSYLGLYCINAMIDE FORMYL	PYROCOCCUS HORIKOSHII	X-RAY	1.7	ADP
2dvm	439AA LONG HYPOTHETICAL MALATE OXIDOREDUCTASE	PYROCOCCUS HORIKOSHII	X-RAY	1.6	NAD
6dwi	4462 FAB LIGHT CHAIN	HOMO SAPIENS	X-RAY	2.39	HD4
5d6c	4497 ANTIBODY IGK (VL AND CL)	HOMO SAPIENS	X-RAY	1.72	57S
6dwa	4497 FAB LIGHT CHAIN	HOMO SAPIENS	X-RAY	1.92	HD4
1hpm	44K ATPASE FRAGMENT (N-TERMINAL) OF 7O KD HEAT-	BOS TAURUS	X-RAY	1.7	ADP
2yxl	450AA LONG HYPOTHETICAL FMU PROTEIN	PYROCOCCUS HORIKOSHII	X-RAY	2.55	SFG
3qho	458AA LONG HYPOTHETICAL ENDO-1,4-BETA-GLUCANASE	PYROCOCCUS HORIKOSHII	X-RAY	1.65	CTT
1o75	47 KDA MEMBRANE ANTIGEN	TREPONEMA PALLIDUM	X-RAY	1.95	PDX
4ob5	4E10 ANTIBODY GERMLINE PRECURSOR 7 HEAVY CHAIN FV	HOMO SAPIENS	X-RAY	1.7	GOL
4xbg	4E10 FAB LIGHT CHAIN	HOMO SAPIENS	X-RAY	2.73	UNL
4xcf	4E10 FAB LIGHT CHAIN	HUMAN IMMUNODEFICIENCY VIRUS 1	X-RAY	1.43	43Y
6irs	4F2 CELL-SURFACE ANTIGEN HEAVY CHAIN	HOMO SAPIENS	ELECTRON	3.3	3PH
1x9q	4M5.3 ANTI-FLUORESCEIN SINGLE CHAIN ANTIBODY FRAGMENT	HOMO SAPIENS	X-RAY	1.5	FLU
2onh	4S-LIMONENE SYNTHASE	MENTHA SPICATA	X-RAY	2.7	F3P
1h7n	5-AMINOLAEVULINIC ACID DEHYDRATASE	SACCHAROMYCES CEREVISIAE	X-RAY	1.6	SHF
2bwn	5-AMINOLEVULINATE SYNTHASE	RHODOBACTER CAPSULATUS	X-RAY	2.1	SIN
2bwna	5-AMINOLEVULINATE SYNTHASE	RHODOBACTER CAPSULATUS	X-RAY	2.1	PLP
6hrh	5-AMINOLEVULINATE SYNTHASE, ERYTHROID-SPECIFIC,	HOMO SAPIENS	X-RAY	2.3	PLP
5txr	5-AMINOLEVULINATE SYNTHASE, MITOCHONDRIAL	SACCHAROMYCES CEREVISIAE (STRAIN ATCC 204508 /	X-RAY	1.9	PLP
3kih	5-BLADED BETA-PROPELLER LECTIN	SYNTHETIC CONSTRUCT	X-RAY	2.49	GDL
2d4e	5-CARBOXYMETHYL-2-HYDROXYMUCONATE SEMIALDEHYDE	THERMUS THERMOPHILUS	X-RAY	2.1	NAD
4qrn	5-CARBOXYVANILLATE DECARBOXYLASE	NOVOSPHINGOBIUM AROMATICIVORANS	X-RAY	1.07	1DF
4l6d	5-CARBOXYVANILLATE DECARBOXYLASE	SPHINGOMONAS PAUCIMOBILIS	X-RAY	1.45	VNL
4lbp	5-CHLORO-2-HYDROXYHYDROQUINONE DEHYDROCHLORINASE (TFTG)	BURKHOLDERIA CEPACIA	X-RAY	1.87	1WG
3zo7	5-CHLOROMUCONOLACTONE DEHALOGENASE	RHODOCOCCUS OPACUS	X-RAY	2.22	K6H
3qv2	5-CYTOSINE DNA METHYLTRANSFERASE	ENTAMOEBA HISTOLYTICA	X-RAY	2.15	SAH
1mi4	5-ENOLPYRUVYLSHIKIMATE-3-PHOSPHATE SYNTHASE	ESCHERICHIA COLI	X-RAY	1.7	S3P
1rf6	5-ENOLPYRUVYLSHIKIMATE-3-PHOSPHATE SYNTHASE	STREPTOCOCCUS PNEUMONIAE	X-RAY	1.9	GPJ
1rf6a	5-ENOLPYRUVYLSHIKIMATE-3-PHOSPHATE SYNTHASE	STREPTOCOCCUS PNEUMONIAE	X-RAY	1.9	S3P
5il3	5-EPI-ARISTOLOCHENE SYNTHASE	NICOTIANA TABACUM	X-RAY	1.85	6BX
2r7l	5-FORMAMINOIMIDAZOLE-4-CARBOXAMIDE-1-(BETA)-D-RIBOFURANOSYL	METHANOCALDOCOCCUS JANNASCHII	X-RAY	2.1	ATP
2r7la	5-FORMAMINOIMIDAZOLE-4-CARBOXAMIDE-1-(BETA)-D-RIBOFURANOSYL	METHANOCALDOCOCCUS JANNASCHII	X-RAY	2.1	AMZ
3hy3	5-FORMYLTETRAHYDROFOLATE CYCLO-LIGASE	HOMO SAPIENS	X-RAY	1.8	10F
2jcb	5-FORMYLTETRAHYDROFOLATE CYCLO-LIGASE FAMILY PROTEIN	BACILLUS ANTHRACIS	X-RAY	1.6	ADP
4q14	5-HYDROXYISOURATE HYDROLASE	BRUCELLA MELITENSIS BIOVAR ABORTUS 2308	X-RAY	1.7	CIT
5v54	5-HYDROXYTRYPTAMINE RECEPTOR 1B,OB-1 FUSED 5-HT1B RECEPTOR,	HOMO SAPIENS, SPODOPTERA FRUGIPERDA	X-RAY	3.9	89F
6a94	5-HYDROXYTRYPTAMINE RECEPTOR 2A,SOLUBLE CYTOCHROME B562	HOMO SAPIENS, ESCHERICHIA COLI	X-RAY	2.9	ZOT
6a94a	5-HYDROXYTRYPTAMINE RECEPTOR 2A,SOLUBLE CYTOCHROME B562	HOMO SAPIENS, ESCHERICHIA COLI	X-RAY	2.9	CLR
5tud	5-HYDROXYTRYPTAMINE RECEPTOR 2B,SOLUBLE CYTOCHROME B562	MUS MUSCULUS	X-RAY	3	ERM
6bqh	5-HYDROXYTRYPTAMINE RECEPTOR 2C,SOLUBLE CYTOCHROME B562	HOMO SAPIENS, ESCHERICHIA COLI	X-RAY	2.7	E2J
6hiq	5-HYDROXYTRYPTAMINE RECEPTOR 3A	MUS MUSCULUS	ELECTRON	3.2	SRO
5kpy	5-HYDROXYTRYPTOPHAN RNA APTAMER	UNIDENTIFIED	X-RAY	2	4PQ
2e7f	5-METHYLTETRAHYDROFOLATE CORRINOID/IRON SULFUR	MOORELLA THERMOACETICA	X-RAY	2.2	C2F
2ycj	5-METHYLTETRAHYDROFOLATE CORRINOID/IRON SULFUR PROTEIN	CARBOXYDOTHERMUS HYDROGENOFORMANS	X-RAY	1.96	C2F
4djd	5-METHYLTETRAHYDROFOLATE CORRINOID/IRON SULFUR PROTEIN	MOORELLA THERMOACETICA	X-RAY	2.38	B12
5vop	5-METHYLTETRAHYDROFOLATE HOMOCYSTEINE S-METHYLTRANSFERASE	THERMUS THERMOPHILUS (STRAIN HB8 / ATCC 27634 /	X-RAY	2.1	C2F
3bof	5-METHYLTETRAHYDROFOLATE S-HOMOCYSTEINE	THERMOTOGA MARITIMA	X-RAY	1.7	HCS
3k13	5-METHYLTETRAHYDROFOLATE-HOMOCYSTEINE METHYLTRANSFERASE	BACTEROIDES THETAIOTAOMICRON	X-RAY	2	THH
3bq5	5-METHYLTETRAHYDROPTEROYLTRIGLUTAMATE-	THERMOTOGA MARITIMA	X-RAY	2	HCS
1u1j	5-METHYLTETRAHYDROPTEROYLTRIGLUTAMATE--	ARABIDOPSIS THALIANA	X-RAY	2.4	C2F
4qqu	5-METHYLTETRAHYDROPTEROYLTRIGLUTAMATE--HOMOCYSTEINE	CANDIDA ALBICANS	X-RAY	2.98	HCS
4qqua	5-METHYLTETRAHYDROPTEROYLTRIGLUTAMATE--HOMOCYSTEINE	CANDIDA ALBICANS	X-RAY	2.98	39S
4l6h	5-METHYLTETRAHYDROPTEROYLTRIGLUTAMATE--HOMOCYSTEINE	CANDIDA ALBICANS SC5314	X-RAY	1.75	MTX
4l6ha	5-METHYLTETRAHYDROPTEROYLTRIGLUTAMATE--HOMOCYSTEINE	CANDIDA ALBICANS SC5314	X-RAY	1.75	HCS
1t7l	5-METHYLTETRAHYDROPTEROYLTRIGLUTAMATE--HOMOCYSTEINE	THERMOTOGA MARITIMA	X-RAY	2	MRY
3eei	5-METHYLTHIOADENOSINE NUCLEOSIDASE/S-ADENOSYLHOMOCYSTEINE	NEISSERIA MENINGITIDIS SEROGROUP B	X-RAY	1.78	MTM
4f0r	5-METHYLTHIOADENOSINE/S-ADENOSYLHOMOCYSTEINE DEAMINASE	CHROMOBACTERIUM VIOLACEUM	X-RAY	1.8	MTA
5k8p	5-NITROANTHRANILIC ACID AMINOHYDROLASE	BRADYRHIZOBIUM SP.	X-RAY	2.2	6R8
2fg9	5-NITROIMIDAZOLE ANTIBIOTIC RESISTANCE PROTEIN	BACTEROIDES THETAIOTAOMICRON	X-RAY	2.2	FAD
1u3g	5,10-METHENYLTETRAHYDROFOLATE SYNTHETASE	MYCOPLASMA PNEUMONIAE	X-RAY	2.5	THF
1u3ga	5,10-METHENYLTETRAHYDROFOLATE SYNTHETASE	MYCOPLASMA PNEUMONIAE	X-RAY	2.5	ADP
3daf	5,10-METHENYLTETRAHYDROMETHANOPTERIN HYDROGENASE	METHANOCALDOCOCCUS JANNASCHII	X-RAY	1.75	FEG
4jjf	5,10-METHENYLTETRAHYDROMETHANOPTERIN HYDROGENASE	METHANOTHERMOBACTER MARBURGENSIS	X-RAY	2.2	FE9
5ok4	5,10-METHENYLTETRAHYDROMETHANOPTERIN HYDROGENASE	METHANOTHERMOBACTER MARBURGENSIS STR. MARBURG	X-RAY	1.29	FEG
1ee9	5,10-METHYLENETETRAHYDROFOLATE DEHYDROGENASE	SACCHAROMYCES CEREVISIAE	X-RAY	3	NAD
1zp4	5,10-METHYLENETETRAHYDROFOLATE REDUCTASE	ESCHERICHIA COLI	X-RAY	1.85	FAD
1zp4a	5,10-METHYLENETETRAHYDROFOLATE REDUCTASE	ESCHERICHIA COLI	X-RAY	1.85	C2F
3fst	5,10-METHYLENETETRAHYDROFOLATE REDUCTASE	ESCHERICHIA COLI K-12	X-RAY	1.65	MRY
3fsta	5,10-METHYLENETETRAHYDROFOLATE REDUCTASE	ESCHERICHIA COLI K-12	X-RAY	1.65	FAD
5ume	5,10-METHYLENETETRAHYDROFOLATE REDUCTASE	HAEMOPHILUS INFLUENZAE (STRAIN ATCC 51907 / DSM	X-RAY	2.7	FAD
1v93	5,10-METHYLENETETRAHYDROFOLATE REDUCTASE	THERMUS THERMOPHILUS	X-RAY	1.9	FAD
5m8s	5,6-DIHYDROXYINDOLE-2-CARBOXYLIC ACID OXIDASE	HOMO SAPIENS	X-RAY	2.2	URS
5aho	5' EXONUCLEASE APOLLO	HOMO SAPIENS	X-RAY	2.16	TLA
4q7f	5' NUCLEOTIDASE FAMILY PROTEIN	STAPHYLOCOCCUS AUREUS SUBSP. AUREUS	X-RAY	1.98	3D1
1ig9	5'-	ENTEROBACTERIA PHAGE RB69	X-RAY	2.6	TTP
2pi4	5'-	ENTEROBACTERIA PHAGE T7	X-RAY	2.5	GH3
2i82	5'-	ESCHERICHIA COLI	X-RAY	2.05	FOU
1l3v	5'-	GEOBACILLUS STEAROTHERMOPHILUS	X-RAY	1.71	SUC
3eeo	5'-	HAEMOPHILUS PARAHAEMOLYTICUS	X-RAY	1.94	SAM
1m3q	5'-	HOMO SAPIENS	X-RAY	1.9	ANG
1nne	5'-	THERMUS AQUATICUS	X-RAY	3.11	ADP
1ehl	5'-(D(5HT)P*(6-4)T)-3'	MUS MUSCULUS	X-RAY	2.4	5HT,DT
1q9y	5'-AC(8-OXOGUANOSINE)GGTAAGCAGTCCGCG-3'	ENTEROBACTERIA PHAGE RB69	X-RAY	2.8	DCP
2v8q	5'-AMP-ACTIVATED PROTEIN KINASE CATALYTIC SUBUNIT ALPHA-1	HOMO SAPIENS	X-RAY	2.1	AMP
4eai	5'-AMP-ACTIVATED PROTEIN KINASE CATALYTIC SUBUNIT ALPHA-1	RATTUS NORVEGICUS	X-RAY	2.29	AMP
3aqv	5'-AMP-ACTIVATED PROTEIN KINASE CATALYTIC SUBUNIT ALPHA-2	HOMO SAPIENS	X-RAY	2.08	TAK
4yef	5'-AMP-ACTIVATED PROTEIN KINASE SUBUNIT BETA-1	RATTUS NORVEGICUS	X-RAY	1.72	4CQ
4yee	5'-AMP-ACTIVATED PROTEIN KINASE SUBUNIT BETA-2	RATTUS NORVEGICUS	X-RAY	2	4CQ
2uv4	5'-AMP-ACTIVATED PROTEIN KINASE SUBUNIT GAMMA-1	HOMO SAPIENS	X-RAY	1.33	AMP
1z0n	5'-AMP-ACTIVATED PROTEIN KINASE, BETA-1 SUBUNIT	RATTUS NORVEGICUS	X-RAY	1.49	BCD
1r0a	5'-D(*A*TP*GP*CP*AP*TP*CP*GP*GP*CP*GP*CP*TP*CP*GP*AP*AP*CP*	MUS MUSCULUS	X-RAY	2.8	GOL
1sxq	5'-D(*AP*AP*AP*AP*AP*AP*GP*TP*TP*TP*TP*TP*T)-3'	ENTEROBACTERIA PHAGE T4	X-RAY	1.8	UDP
1k4t	5'-D(*AP*AP*AP*AP*AP*GP*AP*CP*TP*T)-3'	HOMO SAPIENS	X-RAY	2.1	TTC
1huo	5'-D(*AP*AP*TP*AP*GP*GP*CP*GP*TP*CP*G)-3'	RATTUS NORVEGICUS	X-RAY	2.6	TTE
1yf3	5'-D(*AP*CP*CP*AP*TP*GP*AP*TP*CP*TP*GP*AP*C)-3'	ENTEROBACTERIA PHAGE T4	X-RAY	2.29	SAH
1l0r	5'-D(*AP*CP*GP*AP*AP*GP*TP*GP*CP*GP*AP*AP*GP*C)-		SOLUTION		NGP
1mw8	5'-D(*AP*CP*TP*TP*CP*GP*GP*GP*AP*TP*G)-3'	ESCHERICHIA COLI	X-RAY	1.9	TMP
1nop	5'-D(*AP*GP*AP*GP*TP*T)-3'	HOMO SAPIENS	X-RAY	2.3	C
1ng9	5'-D(*AP*GP*CP*TP*GP*CP*CP*AP*GP*GP*CP*AP*CP*CP*AP*GP*TP*GP	ESCHERICHIA COLI	X-RAY	2.6	ADP
2dpj	5'-D(*AP*GP*GP*AP*CP*CP*(DOC))-3'	HOMO SAPIENS	X-RAY	2.3	TTP
1rgt	5'-D(*AP*GP*TP*C)-3'	HOMO SAPIENS	X-RAY	2	OTR
1ya6	5'-D(*AP*TP*AP*CP*TP*AP*AP*GP*AP*TP*AP*G)-3'	ENTEROBACTERIA PHAGE T4	X-RAY	2.4	UDP
2nq9	5'-D(*AP*TP*AP*TP*CP*T)-3'	ESCHERICHIA COLI	X-RAY	1.45	3DR
3iay	5'-D(*AP*TP*CP*CP*TP*CP*CP*CP*CP*TP*AP*(DOC))-3'	SACCHAROMYCES CEREVISIAE	X-RAY	2	DCP
1z1c	5'-D(*AP*TP*CP*CP*TP*CP*TP*AP*TP*CP*AP*C)-3'	MURINE MINUTE VIRUS (STRAIN MVMI)	X-RAY	3.5	D5M
1tez	5'-D(*AP*TP*CP*GP*GP*CP*T*(TCP)P*CP*GP*C)-3'	SYNECHOCOCCUS ELONGATUS	X-RAY	1.8	FAD
1teza	5'-D(*AP*TP*CP*GP*GP*CP*T*(TCP)P*CP*GP*C)-3'	SYNECHOCOCCUS ELONGATUS	X-RAY	1.8	HDF
2hvs	5'-D(*AP*TP*TP*CP*CP*GP*AP*TP*AP*GP*TP*GP*GP*GP*GP*TP*CP*GP	ENTEROBACTERIA PHAGE T4	X-RAY	2.5	AMP
1zrf	5'-D(*AP*TP*TP*TP*CP*GP*AP*AP*AP*AP*AP*TP*GP*CP*GP*AP*T)-	ESCHERICHIA COLI	X-RAY	2.1	CMP
2hhq	5'-D(*CP*AP*TP*(6OG)P*CP*GP*AP*GP*TP*CP*AP*GP*G)-	GEOBACILLUS STEAROTHERMOPHILUS	X-RAY	1.8	SUC
4nxz	5'-D(*CP*CP*GP*AP*CP*(6OG)P*TP*CP*GP*CP*AP*TP*CP*AP*GP*C)-	HOMO SAPIENS	X-RAY	2.56	1FZ
2hhw	5'-D(*CP*CP*TP*GP*AP*CP*TP*CP*(DDG))-3'	GEOBACILLUS STEAROTHERMOPHILUS	X-RAY	1.88	SUC
2hhwa	5'-D(*CP*CP*TP*GP*AP*CP*TP*CP*(DDG))-3'	GEOBACILLUS STEAROTHERMOPHILUS	X-RAY	1.88	23T
1tk0	5'-D(*CP*GP*AP*AP*AP*AP*CP*GP*A*CP*GP*GP*CP*CP*AP*GP*TP*GP*	ESCHERICHIA COLI	X-RAY	2.3	DCT
2is6	5'-D(*CP*GP*AP*GP*CP*AP*CP*TP*GP*CP*AP*GP*TP*GP*CP*TP*CP*GP	ESCHERICHIA COLI	X-RAY	2.2	ADP
2ofi	5'-D(*CP*GP*GP*AP*CP*TP*(3DR)P*AP*CP*GP*GP*G)-3'	SALMONELLA TYPHI	X-RAY	1.85	ADK
1xsn	5'-D(*CP*GP*GP*CP*AP*AP*TP*AP*CP*TP*G)-3'	HOMO SAPIENS	X-RAY	1.95	D3T
1qum	5'-D(*CP*GP*TP*CP*C)-3'	ESCHERICHIA COLI	X-RAY	1.55	3DR
1de9	5'-D(*CP*TP*AP*C)-3'	HOMO SAPIENS	X-RAY	3	3DR
1ssp	5'-D(*CP*TP*GP*TP*(D1P)P*AP*TP*CP*TP*T)-3'	HOMO SAPIENS	X-RAY	1.9	URA
3f2d	5'-D(*DCP*DAP*DGP*DTP*DGP*DAP*DGP*DAP*DCP*DGP*DGP*DGP*DCP*D	GEOBACILLUS KAUSTOPHILUS	X-RAY	2.51	DGT
1s0v	5'-D(*G*GP*GP*AP*AP*TP*CP*GP*AP*TP*AP*TP*CP*GP*CP*CP*GP*C)-	ENTEROBACTERIA PHAGE T7	X-RAY	3.2	APC
2o8b	5'-D(*GP*AP*AP*CP*CP*GP*CP*GP*CP*GP*CP*TP*AP*GP*G)-3'	HOMO SAPIENS	X-RAY	2.75	ADP
4n5s	5'-D(*GP*AP*CP*CP*AP*CP*GP*GP*CP*GP*CP*(DOC))-3'	THERMUS AQUATICUS	X-RAY	1.67	DCT
1r8e	5'-D(*GP*AP*CP*CP*CP*TP*CP*CP*CP*CP*TP*TP*AP*GP*GP*GP*GP*AP	BACILLUS SUBTILIS	X-RAY	2.4	P4P
1m5r	5'-D(*GP*AP*TP*AP*CP*TP*3DRP*AP*GP*AP*TP*AP*G)-	ENTEROBACTERIA PHAGE T4	X-RAY	1.8	UDP
1m5ra	5'-D(*GP*AP*TP*AP*CP*TP*3DRP*AP*GP*AP*TP*AP*G)-	ENTEROBACTERIA PHAGE T4	X-RAY	1.8	TRS
2hr1	5'-D(*GP*AP*TP*AP*GP*CP*GP*CP*TP*AP*TP*C)-3'	HAEMOPHILUS PARAHAEMOLYTICUS	X-RAY	1.96	SAH
1l3l	5'-D(*GP*AP*TP*GP*TP*GP*CP*AP*GP*AP*TP*CP*TP*GP*CP*AP*CP*AP	AGROBACTERIUM TUMEFACIENS	X-RAY	1.66	LAE
3pjr	5'-D(*GP*CP*AP*GP*TP*GP*CP*TP*CP*GP*TP*TP*TP*TP*T)-3'	GEOBACILLUS STEAROTHERMOPHILUS	X-RAY	3.3	ATP
2is1	5'-D(*GP*CP*AP*GP*TP*GP*CP*TP*CP*GP*TP*TP*TP*TP*TP*TP*T)-	ESCHERICHIA COLI	X-RAY	2.9	GOL
2bcs	5'-D(*GP*CP*CP*G)-3'	HOMO SAPIENS	X-RAY	2.2	PPV
1j59	5'-D(*GP*CP*GP*AP*AP*AP*AP*GP*TP*GP*TP*GP*AP*C)-3'	ESCHERICHIA COLI	X-RAY	2.5	CMP
1fw6	5'-D(*GP*CP*GP*AP*CP*GP*CP*TP*AP*GP*CP*GP*TP*GP*CP*GP*GP*CP	THERMUS AQUATICUS	X-RAY	2.7	ADP
2hhv	5'-D(*GP*CP*GP*AP*TP*CP*AP*GP*CP*TP*TP*G)-3'	GEOBACILLUS STEAROTHERMOPHILUS	X-RAY	1.55	SUC
2kfz	5'-D(*GP*CP*TP*TP*AP*(US1)P*G)-3'	ESCHERICHIA COLI	X-RAY	2.03	US1
1lv5	5'-D(*GP*GP*AP*TP*CP*AP*GP*CP*GP*A)-3'	GEOBACILLUS STEAROTHERMOPHILUS	X-RAY	1.95	DCP
1s0n	5'-D(*GP*GP*CP*AP*CP*TP*GP*AP*TP*CP*AP*CP*G)-3'	SULFOLOBUS SOLFATARICUS	X-RAY	2.8	DCP
1mxj	5'-D(*GP*GP*CP*AP*GP*GP*TP*GP*GP*TP*G)-3'		SOLUTION		BZR
1jtl	5'-D(*GP*GP*CP*CP*AP*AP*TP*TP*GP*G)-3'		X-RAY	1.85	DMY
2agq	5'-D(*GP*GP*CP*TP*AP*CP*AP*GP*GP*AP*CP*TP*(DOC))-3'	SULFOLOBUS SOLFATARICUS	X-RAY	2.1	DTP
2oh2	5'-D(*GP*GP*G*GP*GP*AP*AP*GP*GP*AP*CP*CP*C)-3'	HOMO SAPIENS	X-RAY	3.05	TTP
1jx4	5'-D(*GP*GP*GP*GP*GP*AP*AP*GP*GP*AP*CP*TP*A)-3'	SULFOLOBUS SOLFATARICUS	X-RAY	1.7	ADI
1rrc	5'-D(*GP*TP*C)-3'	ENTEROBACTERIA PHAGE T4	X-RAY	2.46	ADP
1rh0	5'-D(*GP*TP*T)-3'	HOMO SAPIENS	X-RAY	2.3	OTS
2ih2	5'-D(*GP*TP*TP*CP*GP*AP*TP*GP*TP*C)-3'	THERMUS AQUATICUS	X-RAY	1.61	NEA
2i9k	5'-D(*T*GP*AP*TP*AP*GP*CP*GP*CP*TP*AP*TP*C)-3'	HAEMOPHILUS HAEMOLYTICUS	X-RAY	2.65	SAH
1keg	5'-D(*TP*(64T)P*TP*T)-3'	MUS MUSCULUS	X-RAY	2.4	64T
1jft	5'-D(*TP*AP*CP*GP*CP*AP*AP*AP*CP*GP*TP*TP*TP*GP*CP*GP*T)-	ESCHERICHIA COLI	X-RAY	2.5	HPA
3si6	5'-D(*TP*CP*AP*AP*GP*TP*AP*AP*GP*CP*AP*GP*TP*CP*CP*GP*CP*G)	ENTEROBACTERIA PHAGE RB69	X-RAY	1.85	DUP
1yfj	5'-D(*TP*CP*AP*CP*AP*GP*GP*AP*TP*CP*CP*TP*GP*TP*G)-3'	ENTEROBACTERIA PHAGE T4	X-RAY	2.69	SAH
1skm	5'-D(*TP*CP*CP*AP*TP*GP*CP*GP*CP*TP*GP*AP*C)-3'	HAEMOPHILUS HAEMOLYTICUS	X-RAY	2.2	SAH
1d9d	5'-D(*TP*CP*GP)-R(AP*(U31)P*(C31))-3'	ESCHERICHIA COLI	X-RAY	2.18	U31
3osn	5'-D(*TP*CP*TP*(6OG)	HOMO SAPIENS	X-RAY	1.9	TTP
2g1p	5'-D(*TP*CP*TP*AP*GP*AP*TP*CP*TP*AP*GP*A)-3'	ESCHERICHIA COLI	X-RAY	1.89	SAH
1rpz	5'-D(*TP*GP*CP*AP*C)-3'	ENTEROBACTERIA PHAGE T4	X-RAY	2.9	ADP
2alz	5'-D(*TP*GP*GP*GP*GP*TP*CP*CP*T)-3'	HOMO SAPIENS	X-RAY	2.5	DCP
1q3f	5'-D(*TP*GP*TP*(NRI)P*AP*TP*CP*TP*T)-3'	HOMO SAPIENS	X-RAY	1.9	NRI
2q2t	5'-D(*TP*TP*CP*CP*GP*AP*TP*AP*GP*TP*GP*GP*GP*GP*TP*CP*GP*CP	PARAMECIUM BURSARIA CHLORELLA VIRUS 1	X-RAY	2.3	AMP
2hos	5'-D(*TP*TP*TP*TP*GP*CP*CP*AP*TP*GP*TP*AP*AP*TP*CP*CP*CP*CP	DROSOPHILA MELANOGASTER	X-RAY	1.9	GOL
2gxa	5'-D(*TP*TP*TP*TP*TP*TP*TP*TP*TP*TP*TP*TP*T)-3'	BOVINE PAPILLOMAVIRUS TYPE 1	X-RAY	3.15	ADP
2pyj	5'-D(GACTGCTTA(DOC)-3'	BACILLUS PHAGE PHI29	X-RAY	2.03	DGT
1zet	5'-D(P*AP*GP*GP*GP*(BRU)P*CP*CP*(BRU)P*(BRU)	HOMO SAPIENS	X-RAY	2.3	TTP
1pv4	5'-D(P*CP*C)-3'	ESCHERICHIA COLI	X-RAY	3	DC
9mht	5'-D(P*CP*CP*AP*TP*GP*CP*GP*CP*TP*GP*AP*C)-3'	HAEMOPHILUS HAEMOLYTICUS	X-RAY	2.39	SAH
2o5j	5'-D(P*CP*CP*CP*TP*GP*TP*CP*TP*GP*GP*CP*GP*TP*TP*CP*GP*CP*G	THERMUS THERMOPHILUS	X-RAY	3	APC
2fdc	5'-D(P*CP*GP*GP*CP*TP*CP*CP*AP*TP*CP*TP*CP*TP*AP*CP*CP*GP*C	BACILLUS CALDOTENAX	X-RAY	3.3	FLQ
2bcq	5'-D(P*GP*CP*CP*G)-3'	HOMO SAPIENS	X-RAY	1.65	PPV
2i9g	5'-D(P*GP*TP*CP*GP*G)-3'	HOMO SAPIENS	X-RAY	2.1	BPI
2fdi	5'-D(P*TP*(MA7)P*T)-3'	ESCHERICHIA COLI K12	X-RAY	1.8	AKG
1yfl	5'-D(P*TP*CP*AP*CP*AP*GP*GP*AP*TP*CP*CP*TP*GP*TP*GP*A)-3'	ENTEROBACTERIA PHAGE T4	X-RAY	3.09	SFG
2d7d	5'-D(P*TP*TP*T)-3'	BACILLUS SUBTILIS	X-RAY	2.1	ADP
4esv	5'-D(P*TP*TP*TP*TP*TP*TP*TP*TP*TP*TP*TP*TP*TP*T)-3'	GEOBACILLUS STEAROTHERMOPHILUS	X-RAY	3.2	GDP
1k8g	5'-D(TP*TP*GP*GP*GP*G)-3'	STERKIELLA NOVA	X-RAY	2.6	DG
1k27	5'-DEOXY-5'-METHYLTHIOADENOSINE PHOSPHORYLASE	HOMO SAPIENS	X-RAY	1.95	MTM
2pau	5'-DEOXYNUCLEOTIDASE YFBR	ESCHERICHIA COLI	X-RAY	2.1	D5M
1rqp	5'-FLUORO-5'-DEOXYADENOSINE SYNTHASE	STREPTOMYCES CATTLEYA	X-RAY	1.8	SAM
1q9x	5'-GCGGACTGCTTAC(DIDEOXYCYTIDINE)-3'	ENTEROBACTERIA PHAGE RB69	X-RAY	2.69	DOC
3mms	5'-METHYLTHIOADENOSINE / S-ADENOSYLHOMOCYSTEINE	STREPTOCOCCUS PNEUMONIAE	X-RAY	1.6	Q88
2h8g	5'-METHYLTHIOADENOSINE NUCLEOSIDASE	ARABIDOPSIS THALIANA	X-RAY	1.5	ADE
5cce	5'-METHYLTHIOADENOSINE NUCLEOSIDASE	HELICOBACTER PYLORI	NEUTRON	2.5	2WP
5ccea	5'-METHYLTHIOADENOSINE NUCLEOSIDASE	HELICOBACTER PYLORI	NEUTRON	2.5	ADE
4pr3	5'-METHYLTHIOADENOSINE NUCLEOSIDASE / S-	BRUCELLA MELITENSIS BV. 1	X-RAY	2.61	ADE
3bl6	5'-METHYLTHIOADENOSINE NUCLEOSIDASE/S-	STAPHYLOCOCCUS AUREUS	X-RAY	1.7	FMC
3lgs	5'-METHYLTHIOADENOSINE NUCLEOSIDASES	ARABIDOPSIS THALIANA	X-RAY	2.2	SAH
1wta	5'-METHYLTHIOADENOSINE PHOSPHORYLASE	AEROPYRUM PERNIX	X-RAY	1.78	ADE
2a8y	5'-METHYLTHIOADENOSINE PHOSPHORYLASE (MTAP)	SULFOLOBUS SOLFATARICUS	X-RAY	1.45	MTA
6if8	5'-METHYLTHIOADENOSINE/S-ADENOSYLHOMOCYSTEINE NUCLEOSIDASE	AEROMONAS HYDROPHILA SUBSP. HYDROPHILA (STRAIN	X-RAY	2	ADE
4qez	5'-METHYLTHIOADENOSINE/S-ADENOSYLHOMOCYSTEINE NUCLEOSIDASE	BACILLUS ANTHRACIS	X-RAY	2.7	ADE
4qeza	5'-METHYLTHIOADENOSINE/S-ADENOSYLHOMOCYSTEINE NUCLEOSIDASE	BACILLUS ANTHRACIS	X-RAY	2.7	TRS
6ayq	5'-METHYLTHIOADENOSINE/S-ADENOSYLHOMOCYSTEINE NUCLEOSIDASE	CAMPYLOBACTER JEJUNI	X-RAY	1.42	TDI
5dk6	5'-METHYLTHIOADENOSINE/S-ADENOSYLHOMOCYSTEINE NUCLEOSIDASE	COLWELLIA PSYCHRERYTHRAEA	X-RAY	2.27	ADE
4wkc	5'-METHYLTHIOADENOSINE/S-ADENOSYLHOMOCYSTEINE NUCLEOSIDASE	ESCHERICHIA COLI O139:H28	X-RAY	1.64	BIG
4g89	5'-METHYLTHIOADENOSINE/S-ADENOSYLHOMOCYSTEINE NUCLEOSIDASE	KLEBSIELLA PNEUMONIAE SUBSP. PNEUMONIAE	X-RAY	2.1	SAH
4f1w	5'-METHYLTHIOADENOSINE/S-ADENOSYLHOMOCYSTEINE NUCLEOSIDASE	SALMONELLA ENTERICA SUBSP. ENTERICA SEROVAR	X-RAY	1.36	ADE
4f1wa	5'-METHYLTHIOADENOSINE/S-ADENOSYLHOMOCYSTEINE NUCLEOSIDASE	SALMONELLA ENTERICA SUBSP. ENTERICA SEROVAR	X-RAY	1.36	PG4
4wkb	5'-METHYLTHIOADENOSINE/S-ADENOSYLHOMOCYSTEINE NUCLEOSIDASE	VIBRIO CHOLERAE SEROTYPE O1	X-RAY	1.37	TDI
3ty2	5'-NUCLEOTIDASE SURE	COXIELLA BURNETII	X-RAY	1.89	TRS
1eqq	5'-R(*(5MU)P*(5MU)P*(5MU))-3'	ESCHERICHIA COLI	X-RAY	3.2	5MU
2nvt	5'-R(*AP*AP*GP*AP*CP*CP*AP*GP*GP*C)-3'	SACCHAROMYCES CEREVISIAE	X-RAY	3.36	G2P
1q2s	5'-R(*AP*GP*CP*AP*CP*GP*GP*CP*UP*(PQ1)	ZYMOMONAS MOBILIS	X-RAY	3.2	9DG
2nvq	5'-R(*AP*UP*CP*GP*AP*GP*AP*GP*GP*A)-3'	SACCHAROMYCES CEREVISIAE	X-RAY	2.9	DUT
1n1h	5'-R(*AP*UP*UP*AP*GP*C)-3'	MAMMALIAN ORTHOREOVIRUS 3	X-RAY	2.8	G7M
1n1ha	5'-R(*AP*UP*UP*AP*GP*C)-3'	MAMMALIAN ORTHOREOVIRUS 3	X-RAY	2.8	GDP
1n1hb	5'-R(*AP*UP*UP*AP*GP*C)-3'	MAMMALIAN ORTHOREOVIRUS 3	X-RAY	2.8	CH1
1n1hc	5'-R(*AP*UP*UP*AP*GP*C)-3'	MAMMALIAN ORTHOREOVIRUS 3	X-RAY	2.8	GH3
4e7a	5'-R(*CP*AP*UP*GP*GP*C)-D(P*(DOC))-3'	HEPATITIS C VIRUS	X-RAY	3	DOC
2e9r	5'-R(*CP*AP*UP*GP*GP*GP*CP*CP*C)-3'	FOOT-AND-MOUTH DISEASE VIRUS C-S8C1	X-RAY	2.81	RTP
1xpu	5'-R(*CP*UP*CP*UP*CP*UP*CP*U)-3'	ESCHERICHIA COLI	X-RAY	3.05	FPD
1xpua	5'-R(*CP*UP*CP*UP*CP*UP*CP*U)-3'	ESCHERICHIA COLI	X-RAY	3.05	AGS
1b2m	5'-R(*GP*(U34))-3'	ASPERGILLUS ORYZAE	X-RAY	2	G
1t0k	5'-R(*GP*AP*CP*CP*GP*GP*AP*GP*UP*GP*UP*CP*C)-3'	SACCHAROMYCES CEREVISIAE	X-RAY	3.24	MTT
1tfw	5'-R(*GP*CP*GP*GP*AP*UP*CP*CP*GP*CP*AP*C)-3'	ARCHAEOGLOBUS FULGIDUS	X-RAY	2.2	ATP
1uui	5'-R(*GP*GP*CP*AP*GP*AP*UP*CP*UP*GP*AP*GP*CP*	HUMAN IMMUNODEFICIENCY VIRUS TYPE 1	SOLUTION		P12
1i5l	5'-R(*UP*UP*U)-3'	ARCHAEOGLOBUS FULGIDUS	X-RAY	2.75	URI
1wrq	5'-R(*UP*UP*UP*AP*GP*UP*U)-3'	BACILLUS SUBTILIS	X-RAY	2.2	G
1nb7	5'-R(*UP*UP*UP*U)-3'	HEPATITIS C VIRUS	X-RAY	2.9	U
2hyi	5'-R(*UP*UP*UP*UP*UP*U)-3'	HOMO SAPIENS	X-RAY	2.3	ANP
2db3	5'-R(*UP*UP*UP*UP*UP*UP*UP*UP*UP*U)-3'	DROSOPHILA MELANOGASTER	X-RAY	2.2	ANP
2q66	5'-R(P*AP*AP*AP*AP*A)-3'	SACCHAROMYCES CEREVISIAE	X-RAY	1.8	ATP
2ec0	5'-R(P*AP*UP*GP*GP*GP*CP*CP*C)-3'	FOOT-AND-MOUTH DISEASE VIRUS C-S8C1	X-RAY	2.75	PPV
1n38	5'-R(P*GP*C)-3'	MAMMALIAN ORTHOREOVIRUS 3	X-RAY	2.8	U3H
1n38a	5'-R(P*GP*C)-3'	MAMMALIAN ORTHOREOVIRUS 3	X-RAY	2.8	CH1
1n35	5'-R(P*GP*GP*GP*GP*G)-3'	MAMMALIAN ORTHOREOVIRUS 3	X-RAY	2.5	CH1
2e9t	5'-R(P*UP*AP*GP*GP*GP*CP*CP*C)-3'	FOOT-AND-MOUTH DISEASE VIRUS C-S8C1	X-RAY	2.6	5FU
2e9ta	5'-R(P*UP*AP*GP*GP*GP*CP*CP*C)-3'	FOOT-AND-MOUTH DISEASE VIRUS C-S8C1	X-RAY	2.6	PPV
1pvo	5'-R(P*UP*C)-3'	ESCHERICHIA COLI	X-RAY	3	ANP
2g8v	5'-R(P*UP*CP*GP*AP*CP*A)-3'	BACILLUS HALODURANS	X-RAY	1.85	A
1wmq	5'-R(P*UP*UP*UP*AP*GP*UP*U)-3'	BACILLUS SUBTILIS	X-RAY	1.6	HIS
1wmqa	5'-R(P*UP*UP*UP*AP*GP*UP*U)-3'	BACILLUS SUBTILIS	X-RAY	1.6	G
2g4b	5'-R(P*UP*UP*UP*UP*UP*UP*U)-3'	HOMO SAPIENS	X-RAY	2.5	U
1m8v	5'-R(P*UP*UP*UP*UP*UP*UP*U)-3'	PYROCOCCUS ABYSSI	X-RAY	2.6	U
4fva	5'-TYROSYL-DNA PHOSPHODIESTERASE	CAENORHABDITIS ELEGANS	X-RAY	2.07	MLI
4i5v	5',5'''-P-1,P-4-TETRAPHOSPHATE PHOSPHORYLASE 2	SACCHAROMYCES CEREVISIAE	X-RAY	2.7	B4P
2i7d	5'(3')-DEOXYRIBONUCLEOTIDASE, CYTOSOLIC TYPE	HOMO SAPIENS	X-RAY	1.2	DUR
6g2m	5'(3')-DEOXYRIBONUCLEOTIDASE, MITOCHONDRIAL	HOMO SAPIENS	X-RAY	1.37	O84
4ryu	5'/3'-NUCLEOTIDASE SURE	SALMONELLA ENTERICA SUBSP. ENTERICA SEROVAR	X-RAY	2.04	MPD
4xj7	5'/3'-NUCLEOTIDASE SURE	SALMONELLA TYPHIMURIUM (STRAIN LT2 / SGSC1412 /	X-RAY	1.6	ADN
4xj7a	5'/3'-NUCLEOTIDASE SURE	SALMONELLA TYPHIMURIUM (STRAIN LT2 / SGSC1412 /	X-RAY	1.6	ADE
1q92	5(3)-DEOXYRIBONUCLEOTIDASE	HOMO SAPIENS	X-RAY	1.4	DRM
4lq4	50S RIBOSOMAL PROTEIN L1	METHANOCALDOCOCCUS JANNASCHII	X-RAY	1.75	TLA
5col	50S RIBOSOMAL PROTEIN L11	METHANOCALDOCOCCUS JANNASCHII	X-RAY	2.25	PGE
4lit	50S RIBOSOMAL PROTEIN L16 ARGININE HYDROXYLASE	ESCHERICHIA COLI	X-RAY	2.4	AKG
5ady	50S RIBOSOMAL PROTEIN L32	ESCHERICHIA COLI K-12	ELECTRON	4.5	GNP
5v7q	50S RIBOSOMAL PROTEIN L32	MYCOBACTERIUM TUBERCULOSIS	ELECTRON	3.7	917
1xbi	50S RIBOSOMAL PROTEIN L7AE	METHANOCALDOCOCCUS JANNASCHII	X-RAY	1.45	EPE
5k9j	56.A.09 HEAVY CHAIN	HOMO SAPIENS	X-RAY	1.9	15P
5bk3	580 ANTIBODY, LIGHT CHAIN	HOMO SAPIENS	X-RAY	2.8	FUC
3nzh	5F6 LIGHT CHAIN	HOMO SAPIENS, MUS MUSCULUS	X-RAY	2	GOL
5iwl	5F9 DIABODY	HOMO SAPIENS	X-RAY	2.8	PGE
6dry	5HT2B RECEPTOR, BRIL CHIMERA	HOMO SAPIENS, ESCHERICHIA COLI	X-RAY	2.92	H8D
3fy4	6-4 PHOTOLYASE	ARABIDOPSIS THALIANA	X-RAY	2.7	FAD
3fy4a	6-4 PHOTOLYASE	ARABIDOPSIS THALIANA	X-RAY	2.7	MES
3a2q	6-AMINOHEXANOATE-CYCLIC-DIMER HYDROLASE	ARTHROBACTER SP.	X-RAY	1.8	ACA
3vwn	6-AMINOHEXANOATE-DIMER HYDROLASE	FLAVOBACTERIUM	X-RAY	1.2	GOL
3vwna	6-AMINOHEXANOATE-DIMER HYDROLASE	FLAVOBACTERIUM	X-RAY	1.2	MES
4ntk	6-CARBOXY-5,6,7,8-TETRAHYDROPTERIN SYNTHASE	ESCHERICHIA COLI	X-RAY	1.6	ZSP
5tva	6-CARBOXYHEXANOATE--COA LIGASE	AQUIFEX AEOLICUS	X-RAY	2.25	AMP
5tvaa	6-CARBOXYHEXANOATE--COA LIGASE	AQUIFEX AEOLICUS	X-RAY	2.25	COA
5g1f	6-CARBOXYHEXANOATE-COA LIGASE	BACILLUS SUBTILIS	X-RAY	2.25	COA
5g1fa	6-CARBOXYHEXANOATE-COA LIGASE	BACILLUS SUBTILIS	X-RAY	2.25	PML
1z8o	6-DEOXYERYTHRONOLIDE B HYDROXYLASE	SACCHAROPOLYSPORA ERYTHRAEA	X-RAY	1.7	HEM
1z8oa	6-DEOXYERYTHRONOLIDE B HYDROXYLASE	SACCHAROPOLYSPORA ERYTHRAEA	X-RAY	1.7	DEB
2bvf	6-HYDROXY-D-NICOTINE OXIDASE	ARTHROBACTER NICOTINOVORANS	X-RAY	1.92	FAD
1hq2	6-HYDROXYMETHYL-7,8-DIHYDROPTERIN	ESCHERICHIA COLI	X-RAY	1.25	PH2
1hq2a	6-HYDROXYMETHYL-7,8-DIHYDROPTERIN	ESCHERICHIA COLI	X-RAY	1.25	APC
1szo	6-OXOCAMPHOR HYDROLASE	RHODOCOCCUS SP. NCIMB 9784	X-RAY	1.9	CAX
3f5m	6-PHOSPHO-1-FRUCTOKINASE (ATP-DEPENDENT	TRYPANOSOMA BRUCEI	X-RAY	2.7	ATP
6dux	6-PHOSPHO-ALPHA-GLUCOSIDASE	KLEBSIELLA PNEUMONIAE	X-RAY	2.25	NAD
5foo	6-PHOSPHO-BETA-D GLYCOSIDASE	STREPTOCOCCUS PYOGENES	X-RAY	2.1	JAZ
4pbg	6-PHOSPHO-BETA-D-GALACTOSIDASE	LACTOCOCCUS LACTIS	X-RAY	2.5	BGP
4gpn	6-PHOSPHO-BETA-D-GLUCOSIDASE	STREPTOCOCCUS MUTANS	X-RAY	2.29	6GB
3qom	6-PHOSPHO-BETA-GLUCOSIDASE	LACTOBACILLUS PLANTARUM	X-RAY	1.5	BGC
3opy	6-PHOSPHOFRUCTO-1-KINASE ALPHA-SUBUNIT	PICHIA PASTORIS	X-RAY	3.05	ATP
1bif	6-PHOSPHOFRUCTO-2-KINASE/ FRUCTOSE-2,6-BISPHOSPHATASE	RATTUS NORVEGICUS	X-RAY	2	AGS
2axn	6-PHOSPHOFRUCTO-2-KINASE/FRUCTOSE-2,6-	HOMO SAPIENS	X-RAY	2.1	F6P
2axna	6-PHOSPHOFRUCTO-2-KINASE/FRUCTOSE-2,6-	HOMO SAPIENS	X-RAY	2.1	EDT
2axnb	6-PHOSPHOFRUCTO-2-KINASE/FRUCTOSE-2,6-	HOMO SAPIENS	X-RAY	2.1	ADP
1k6m	6-PHOSPHOFRUCTO-2-KINASE/FRUCTOSE-2,6-BIPHOSPHATASE 2-	HOMO SAPIENS	X-RAY	2.4	AGS
5hr5	6-PHOSPHOFRUCTO-2-KINASE/FRUCTOSE-2,6-BISPHOSPHATASE 2	BOS TAURUS	X-RAY	1.82	ADP
5hr5a	6-PHOSPHOFRUCTO-2-KINASE/FRUCTOSE-2,6-BISPHOSPHATASE 2	BOS TAURUS	X-RAY	1.82	FLC
5hr5b	6-PHOSPHOFRUCTO-2-KINASE/FRUCTOSE-2,6-BISPHOSPHATASE 2	BOS TAURUS	X-RAY	1.82	F6P
6hvi	6-PHOSPHOFRUCTO-2-KINASE/FRUCTOSE-2,6-BISPHOSPHATASE 3	HOMO SAPIENS	X-RAY	1.96	FLC
6hvia	6-PHOSPHOFRUCTO-2-KINASE/FRUCTOSE-2,6-BISPHOSPHATASE 3	HOMO SAPIENS	X-RAY	1.96	F6P
6hvib	6-PHOSPHOFRUCTO-2-KINASE/FRUCTOSE-2,6-BISPHOSPHATASE 3	HOMO SAPIENS	X-RAY	1.96	GV5
4i7e	6-PHOSPHOFRUCTOKINASE	BACILLUS STEAROTHERMOPHILUS	X-RAY	2	PEP
4i4i	6-PHOSPHOFRUCTOKINASE	GEOBACILLUS STEAROTHERMOPHILUS	X-RAY	2.49	PEP
3umo	6-PHOSPHOFRUCTOKINASE ISOZYME 2	ESCHERICHIA COLI	X-RAY	1.7	ATP
3o8o	6-PHOSPHOFRUCTOKINASE SUBUNIT ALPHA	SACCHAROMYCES CEREVISIAE	X-RAY	2.9	FDP
3o8oa	6-PHOSPHOFRUCTOKINASE SUBUNIT ALPHA	SACCHAROMYCES CEREVISIAE	X-RAY	2.9	F6P
3o8n	6-PHOSPHOFRUCTOKINASE, MUSCLE TYPE	ORYCTOLAGUS CUNICULUS	X-RAY	3.2	ADP
1pgn	6-PHOSPHOGLUCONATE DEHYDROGENASE	OVIS ARIES	X-RAY	2.3	NBP
5u5g	6-PHOSPHOGLUCONATE DEHYDROGENASE	PSEUDOMONAS SYRINGAE	X-RAY	2.05	NAP
4e+21	6-PHOSPHOGLUCONATE DEHYDROGENASE (DECARBOXYLATING)	GEOBACTER METALLIREDUCENS	X-RAY	2.3	MRD
2w8z	6-PHOSPHOGLUCONATE DEHYDROGENASE,	GEOBACILLUS STEAROTHERMOPHILUS	X-RAY	2.3	6PG
2w8za	6-PHOSPHOGLUCONATE DEHYDROGENASE,	GEOBACILLUS STEAROTHERMOPHILUS	X-RAY	2.3	TRS
2iyp	6-PHOSPHOGLUCONATE DEHYDROGENASE,	LACTOCOCCUS LACTIS	X-RAY	2.79	5RP
2iypa	6-PHOSPHOGLUCONATE DEHYDROGENASE,	LACTOCOCCUS LACTIS	X-RAY	2.79	NAP
2iypb	6-PHOSPHOGLUCONATE DEHYDROGENASE,	LACTOCOCCUS LACTIS	X-RAY	2.79	A2P
2zyd	6-PHOSPHOGLUCONATE DEHYDROGENASE, DECARBOXYLATING	ESCHERICHIA COLI	X-RAY	1.5	GLO
2w90	6-PHOSPHOGLUCONATE DEHYDROGENASE, DECARBOXYLATING	GEOBACILLUS STEAROTHERMOPHILUS	X-RAY	2.2	6PG
2w90a	6-PHOSPHOGLUCONATE DEHYDROGENASE, DECARBOXYLATING	GEOBACILLUS STEAROTHERMOPHILUS	X-RAY	2.2	SO4
4gwg	6-PHOSPHOGLUCONATE DEHYDROGENASE, DECARBOXYLATING	HOMO SAPIENS	X-RAY	1.39	MES
2iz1	6-PHOSPHOGLUCONATE DEHYDROGENASE, DECARBOXYLATING	LACTOCOCCUS LACTIS	X-RAY	2.3	ATR
2iz1a	6-PHOSPHOGLUCONATE DEHYDROGENASE, DECARBOXYLATING	LACTOCOCCUS LACTIS	X-RAY	2.3	RES
2iz1b	6-PHOSPHOGLUCONATE DEHYDROGENASE, DECARBOXYLATING	LACTOCOCCUS LACTIS	X-RAY	2.3	P33
6fqz	6-PHOSPHOGLUCONATE DEHYDROGENASE, DECARBOXYLATING	PLASMODIUM FALCIPARUM 3D7	X-RAY	1.9	6PG
2p4q	6-PHOSPHOGLUCONATE DEHYDROGENASE, DECARBOXYLATING 1	SACCHAROMYCES CEREVISIAE	X-RAY	2.37	FLC
3pef	6-PHOSPHOGLUCONATE DEHYDROGENASE, NAD-BINDING	GEOBACTER METALLIREDUCENS	X-RAY	2.07	NAP
3ws7	6-PHOSPHOGLUCONATE DEHYDROGENASE, NAD-BINDING PROTEIN	PYROBACULUM CALIDIFONTIS	X-RAY	1.18	NAP
6nau	6-PHOSPHOGLUCONOLACTONASE	KLEBSIELLA PNEUMONIAE SUBSP. PNEUMONIAE	X-RAY	1.55	B3P
3nwp	6-PHOSPHOGLUCONOLACTONASE	SHEWANELLA BALTICA	X-RAY	1.4	GOL
1vl1	6-PHOSPHOGLUCONOLACTONASE	THERMOTOGA MARITIMA	X-RAY	1.55	CIT
3eb9	6-PHOSPHOGLUCONOLACTONASE	TRYPANOSOMA BRUCEI	X-RAY	2	FLC
3i2b	6-PYRUVOYL TETRAHYDROBIOPTERIN SYNTHASE	HOMO SAPIENS	X-RAY	2.3	PEG
3lx3	6-PYRUVOYL TETRAHYDROBIOPTERIN SYNTHASE	PLASMODIUM VIVAX	X-RAY	1.55	XTN
1y13	6-PYRUVOYL TETRAHYDROPTERIN SYNTHASE	PLASMODIUM FALCIPARUM	X-RAY	2.2	BIO
2a0s	6-PYRUVOYL TETRAHYDROPTERIN SYNTHASE	PLASMODIUM VIVAX	X-RAY	2.2	BIO
1b66	6-PYRUVOYL TETRAHYDROPTERIN SYNTHASE	RATTUS RATTUS	X-RAY	1.9	BIO
1nqu	6,7-DIMETHYL-8-RIBITYLLUMAZINE SYNTHASE	AQUIFEX AEOLICUS	X-RAY	1.75	RDL
1zis	6,7-DIMETHYL-8-RIBITYLLUMAZINE SYNTHASE	BACILLUS SUBTILIS	X-RAY	2.9	INI
1t13	6,7-DIMETHYL-8-RIBITYLLUMAZINE SYNTHASE	BRUCELLA ABORTUS	X-RAY	2.9	INI
2jfb	6,7-DIMETHYL-8-RIBITYLLUMAZINE SYNTHASE	CANDIDA ALBICANS	X-RAY	2.5	MPD
4kq6	6,7-DIMETHYL-8-RIBITYLLUMAZINE SYNTHASE	CANDIDA GLABRATA	X-RAY	2.24	DLZ
2c92	6,7-DIMETHYL-8-RIBITYLLUMAZINE SYNTHASE	MYCOBACTERIUM TUBERCULOSIS	X-RAY	1.6	TP6
1kyv	6,7-DIMETHYL-8-RIBITYLLUMAZINE SYNTHASE	SCHIZOSACCHAROMYCES POMBE	X-RAY	2.4	RBF
2f59	6,7-DIMETHYL-8-RIBITYLLUMAZINE SYNTHASE 1	BRUCELLA ABORTUS	X-RAY	2.3	INI
2o6h	6,7-DIMETHYL-8-RIBITYLLUMAZINE SYNTHASE 1	BRUCELLA MELITENSIS	X-RAY	2.7	INI
2obx	6,7-DIMETHYL-8-RIBITYLLUMAZINE SYNTHASE 1	MESORHIZOBIUM LOTI	X-RAY	2.53	INI
1fya	60 KD CHAPERONIN	ESCHERICHIA COLI	X-RAY	2.2	GOL
6nqa	601 DNA STRAND 1	XENOPUS LAEVIS	ELECTRON	3.54	SAM
6dw2	6078 FAB LIGHT CHAIN	HOMO SAPIENS	X-RAY	1.7	HD4
6dw2a	6078 FAB LIGHT CHAIN	HOMO SAPIENS	X-RAY	1.7	MLA
2gwl	65 KDA VIRULENCE PROTEIN	SALMONELLA TYPHIMURIUM	X-RAY	1.9	NAI
3ley	6A7 ANTIBODY HEAVY CHAIN	HUMAN IMMUNODEFICIENCY VIRUS 1	X-RAY	1.99	P
2g5b	6A7 FAB LIGHT CHAIN	MUS MUSCULUS	X-RAY	2.3	I
4nja	6C8 LIGHT CHAIN	MUS MUSCULUS	X-RAY	2.2	2M9
1fmc	7 ALPHA-HYDROXYSTEROID DEHYDROGENASE	ESCHERICHIA COLI	X-RAY	1.8	CHO
1fmca	7 ALPHA-HYDROXYSTEROID DEHYDROGENASE	ESCHERICHIA COLI	X-RAY	1.8	NAI
5epo	7-ALPHA-HYDROXYSTEROID DEYDROGENASE	CLOSTRIDIUM SARDINIENSE	X-RAY	2	NAP
5epoa	7-ALPHA-HYDROXYSTEROID DEYDROGENASE	CLOSTRIDIUM SARDINIENSE	X-RAY	2	TUD
5th5	7-CARBOXY-7-DEAZAGUANINE SYNTHASE	BACILLUS SUBTILIS	X-RAY	2.41	7C5
4njh	7-CARBOXY-7-DEAZAGUANINE SYNTHASE	BURKHOLDERIA MULTIVORANS	X-RAY	1.9	SAM
4njha	7-CARBOXY-7-DEAZAGUANINE SYNTHASE	BURKHOLDERIA MULTIVORANS	X-RAY	1.9	2K8
6nhl	7-CARBOXY-7-DEAZAGUANINE SYNTHASE	ESCHERICHIA COLI 1303	X-RAY	2.1	SF4
1bd6	7-FE FERREDOXIN	BACILLUS SCHLEGELII	SOLUTION		SF4
6fd1	7-FE FERREDOXIN I (FD1)	AZOTOBACTER VINELANDII	X-RAY	1.35	SF4
5dqr	7-HYDROXYMETHYL CHLOROPHYLL A REDUCTASE, CHLOROPLASTIC	ARABIDOPSIS THALIANA	X-RAY	2.7	FAD
4nv0	7-METHYLGUANOSINE PHOSPHATE-SPECIFIC 5'-NUCLEOTIDASE	DROSOPHILA MELANOGASTER	X-RAY	1.65	MG7
1mly	7,8-DIAMINO-PELARGONIC ACID AMINOTRANSFERASE	ESCHERICHIA COLI	X-RAY	1.81	ACZ, PLP
1qj5	7,8-DIAMINOPELARGONIC ACID SYNTHASE	ESCHERICHIA COLI BL21(DE3)	X-RAY	1.8	PLP
2qx0	7,8-DIHYDRO-6-HYDROXYMETHYLPTERIN-	YERSINIA PESTIS	X-RAY	1.8	APC
2qx0a	7,8-DIHYDRO-6-HYDROXYMETHYLPTERIN-	YERSINIA PESTIS	X-RAY	1.8	PH2
4cwb	7,8-DIHYDRO-6-HYDROXYMETHYLPTERIN-PYROPHOSPHOKINASE	STAPHYLOCOCCUS AUREUS	X-RAY	1.56	X6L
4cwba	7,8-DIHYDRO-6-HYDROXYMETHYLPTERIN-PYROPHOSPHOKINASE	STAPHYLOCOCCUS AUREUS	X-RAY	1.56	APC
5ws7	7,8-DIHYDRO-8-OXOGUANINE TRIPHOSPHATASE	HOMO SAPIENS	X-RAY	1	6U4
5mzg	7,8-DIHYDRO-8-OXOGUANINE TRIPHOSPHATASE	MUS MUSCULUS	X-RAY	1.85	2GE
5f3m	7,8-DIHYDRONEOPTERIN ALDOLASE	BACILLUS ANTHRACIS STR. 'AMES ANCESTOR'	X-RAY	1.5	NEU
5far	7,8-DIHYDRONEOPTERIN ALDOLASE	BACILLUS CEREUS BAG3X2-1	X-RAY	2	9MG
2dhn	7,8-DIHYDRONEOPTERIN ALDOLASE	STAPHYLOCOCCUS AUREUS	X-RAY	2.2	PH2
3tyz	7,8-DIHYDROPTEROATE SYNTHASE	YERSINIA PESTIS	X-RAY	2.07	XHP
3tyza	7,8-DIHYDROPTEROATE SYNTHASE	YERSINIA PESTIS	X-RAY	2.07	PAB
2vn1	70 KDA PEPTIDYLPROLYL ISOMERASE	PLASMODIUM FALCIPARUM	X-RAY	2.35	FK5
3ihz	70 KDA PEPTIDYLPROLYL ISOMERASE, PUTATIVE	PLASMODIUM VIVAX	X-RAY	1.67	FK5
4b2n	70 KDA PROTEIN	XANTHOMONAS SP.	X-RAY	1.8	EPE
1sly	70-KDA SOLUBLE LYTIC TRANSGLYCOSYLASE	ESCHERICHIA COLI	X-RAY	2.8	BLG
1kaz	70KD HEAT SHOCK COGNATE PROTEIN	BOS TAURUS	X-RAY	1.7	ATP
6gcs	75-KDA PROTEIN (NUAM)	YARROWIA LIPOLYTICA	ELECTRON	4.32	FMN
6gcsa	75-KDA PROTEIN (NUAM)	YARROWIA LIPOLYTICA	ELECTRON	4.32	NDP
6gcsb	75-KDA PROTEIN (NUAM)	YARROWIA LIPOLYTICA	ELECTRON	4.32	ZMP
2cvi	75AA LONG HYPOTHETICAL REGULATORY PROTEIN ASNC	PYROCOCCUS HORIKOSHII	X-RAY	1.5	MPD
6eof	78 KDA GLUCOSE-REGULATED PROTEIN	CRICETULUS GRISEUS	X-RAY	1.59	ADP
5f0x	78 KDA GLUCOSE-REGULATED PROTEIN	HOMO SAPIENS	X-RAY	1.6	DTP
3qfu	78 KDA GLUCOSE-REGULATED PROTEIN HOMOLOG	SACCHAROMYCES CEREVISIAE	X-RAY	1.8	ADP
1ct8	7C8 FAB FRAGMENT SHORT CHAIN	MUS MUSCULUS	X-RAY	2.2	TAA
1g3o	7FE FERREDOXIN I	AZOTOBACTER VINELANDII	X-RAY	1.65	SF4
6dcc	7SK SNRNA METHYLPHOSPHATE CAPPING ENZYME	HOMO SAPIENS	X-RAY	2.1	SAH
5k8b	8-AMINO-3,8-DIDEOXY-ALPHA-D-MANNO-OCTULOSONATE	SHEWANELLA ONEIDENSIS (STRAIN MR-1)	X-RAY	2.15	PDG
5vnx	8-AMINO-7-OXONONANOATE SYNTHASE	BURKHOLDERIA MULTIVORANS (STRAIN ATCC 17616 /	X-RAY	1.65	BEN
1dj9	8-AMINO-7-OXONONANOATE SYNTHASE	ESCHERICHIA COLI	X-RAY	2	KAM
5mgz	8-DEMETHYLNOVOBIOCIC ACID C(8)-METHYLTRANSFERASE	STREPTOMYCES NIVEUS	X-RAY	1.9	SAH
1xqp	8-OXOGUANINE DNA GLYCOSYLASE	PYROBACULUM AEROPHILUM	X-RAY	1.69	8HG
3i0x	8-OXOGUANINE-DNA-GLYCOSYLASE	CLOSTRIDIUM ACETOBUTYLICUM	X-RAY	1.73	8OG
1h2t	80 KDA NUCLEAR CAP BINDING PROTEIN	HOMO SAPIENS	X-RAY	2.1	GDP
1h2ta	80 KDA NUCLEAR CAP BINDING PROTEIN	HOMO SAPIENS	X-RAY	2.1	7MG
3g5v	806 LIGHT CHAIN	MUS MUSCULUS	X-RAY	2	GOL
1yuh	88C6/12 FAB (LIGHT CHAIN)	MUS MUSCULUS	X-RAY	3	NP
4nj9	8B10 LIGHT CHAIN	MUS MUSCULUS	X-RAY	1.95	2M9
3eyf	8F9 FAB	HOMO SAPIENS	X-RAY	2.3	GOL
1gkd	92 KDA TYPE IV COLLAGENASE	HOMO SAPIENS	X-RAY	2.1	STN
4wk7	A DISINTEGRIN AND METALLOPROTEINASE WITH THROMBOSPONDIN	HOMO SAPIENS	X-RAY	1.24	3PQ
4zab	A NIGER FDC1	ASPERGILLUS NIGER (STRAIN CBS 513.88 / FGSC	X-RAY	1.16	4LU
4zaba	A NIGER FDC1	ASPERGILLUS NIGER (STRAIN CBS 513.88 / FGSC	X-RAY	1.16	4LW
2p05	A NON-BIOLOGICAL ATP BINDING PROTEIN 1819	UNIDENTIFIED	X-RAY	2.8	ADP
2hku	A PUTATIVE TRANSCRIPTIONAL REGULATOR	RHODOCOCCUS SP.	X-RAY	2	PG4
5jj2	A-KINASE ANCHOR PROTEIN 7 ISOFORM GAMMA	HOMO SAPIENS	X-RAY	1.25	MLI
3i73	A-TYPE ATP SYNTHASE CATALYTIC SUBUNIT A	PYROCOCCUS HORIKOSHII	X-RAY	2.4	ADP
2q9u	A-TYPE FLAVOPROTEIN	GIARDIA INTESTINALIS	X-RAY	1.9	FMN
3n5n	A/G-SPECIFIC ADENINE DNA GLYCOSYLASE	HOMO SAPIENS	X-RAY	2.3	SF4
4ilg	A1 CISTRON-SPLICING FACTOR AAR2	SACCHAROMYCES CEREVISIAE	X-RAY	2.1	EPE
3wct	A1 GLOBIN CHAIN OF GIANT V2 HEMOGLOBIN	LAMELLIBRACHIA SATSUMA	X-RAY	2.4	HEM
3rlk	A1 PROTEIN	ENTEROBACTERIA PHAGE QBETA	X-RAY	1.76	PG4
3zl4	A17 ANTIBODY FAB FRAGMENT HEAVY CHAIN	HOMO SAPIENS	X-RAY	1.95	MES
5yoj	A17 HIV-1 PROTEASE	HUMAN IMMUNODEFICIENCY VIRUS 1	X-RAY	1.5	8Z0
2ex1	A2,3-SIALYLTRANSFERASE, A2,A6-SIALYLTRANSFERASE	PASTEURELLA MULTOCIDA	X-RAY	2	C5P
2nv9	A207R PROTEIN, ARGININE DECARBOXYLASE	PARAMECIUM BURSARIA CHLORELLA VIRUS 1	X-RAY	1.95	PLP
4odv	A6 FAB (IGG2B KAPPA) LIGHT CHAIN	MUS MUSCULUS	X-RAY	2.15	Z9M
3kmt	A612L PROTEIN	HOMO SAPIENS	X-RAY	1.78	SAH
3qb8	A654L PROTEIN	PARAMECIUM BURSARIA CHLORELLA VIRUS 1	X-RAY	1.5	COA
3lpw	A77-A78 DOMAIN FROM TITIN	HOMO SAPIENS	X-RAY	1.65	MRD
5uiz	AA10A	THERMOBIFIDA FUSCA	X-RAY	2	GOL
2r9g	AAA ATPASE, CENTRAL REGION	ENTEROCOCCUS FAECIUM	X-RAY	2.09	GOL
2v6y	AAA FAMILY ATPASE, P60 KATANIN	SULFOLOBUS SOLFATARICUS	X-RAY	2.4	SRT
6bc3	AAC 3-VI PROTEIN	ENTEROBACTER CLOACAE	X-RAY	2.05	COA
6bc3a	AAC 3-VI PROTEIN	ENTEROBACTER CLOACAE	X-RAY	2.05	SIS
6mb5	AAC(3)-IIIB PROTEIN	PSEUDOMONAS AERUGINOSA	X-RAY	2.2	NMY
2bue	AAC(6')-IB	ESCHERICHIA COLI	X-RAY	1.7	COA
2buea	AAC(6')-IB	ESCHERICHIA COLI	X-RAY	1.7	RIO
1n71	AAC(6')-II	ENTEROCOCCUS FAECIUM	X-RAY	1.8	COA
5hmn	AAC3-I	UNCULTURED BACTERIUM	X-RAY	2.02	COA
5hmna	AAC3-I	UNCULTURED BACTERIUM	X-RAY	2.02	PG4
5cfs	AAD(2''),GENTAMICIN 2''-NUCLEOTIDYLTRANSFERASE,GENTAMICIN	PSEUDOMONAS AERUGINOSA	X-RAY	1.7	TOY
5cfsa	AAD(2''),GENTAMICIN 2''-NUCLEOTIDYLTRANSFERASE,GENTAMICIN	PSEUDOMONAS AERUGINOSA	X-RAY	1.7	APC
4xje	AADB	PSEUDOMONAS AERUGINOSA	X-RAY	1.88	AMP
4xjea	AADB	PSEUDOMONAS AERUGINOSA	X-RAY	1.88	TOY
6nbn	AAEL005772-PA	AEDES AEGYPTI	SOLUTION		ACD
5v13	AAEL008620-PA ODORANT-BINDING PROTEIN	AEDES AEGYPTI	X-RAY	1.84	JH3
3hdb	AAHIV	AGKISTRODON ACUTUS	X-RAY	2.31	L
3ujt	AB-52 HEAVY CHAIN	MUS MUSCULUS	X-RAY	2.1	TRS
3ujta	AB-52 HEAVY CHAIN	MUS MUSCULUS	X-RAY	2.1	GOL
4pb0	AB53 HEAVY CHAIN	MUS MUSCULUS	X-RAY	2.5	TRS
4zxh	ABBFA_003403	ACINETOBACTER BAUMANNII (STRAIN AB307-0294)	X-RAY	2.7	PNS
4zxha	ABBFA_003403	ACINETOBACTER BAUMANNII (STRAIN AB307-0294)	X-RAY	2.7	PX4
3l49	ABC SUGAR (RIBOSE) TRANSPORTER, PERIPLASMIC SUBSTRATE-	RHODOBACTER SPHAEROIDES	X-RAY	2.3	UNL
6m96	ABC TRANSPORTER	AQUIFEX AEOLICUS (STRAIN VF5)	X-RAY	2.05	ATP
6m96a	ABC TRANSPORTER	AQUIFEX AEOLICUS (STRAIN VF5)	X-RAY	2.05	PEE
4g68	ABC TRANSPORTER	CALDANAEROBIUS	X-RAY	1.8	XYP
4wwh	ABC TRANSPORTER	MYCOBACTERIUM SMEGMATIS	X-RAY	1.2	TRS
4wwha	ABC TRANSPORTER	MYCOBACTERIUM SMEGMATIS	X-RAY	1.2	GAL
3rpw	ABC TRANSPORTER	RHODOPSEUDOMONAS PALUSTRIS	X-RAY	1.65	GOL
1ji0	ABC TRANSPORTER	THERMOTOGA MARITIMA	X-RAY	2	ATP
3bk7	ABC TRANSPORTER ATP-BINDING PROTEIN	PYROCOCCUS ABYSSI	X-RAY	2.8	ADP
6mjp	ABC TRANSPORTER ATP-BINDING PROTEIN	VIBRIO CHOLERAE	X-RAY	2.85	JU7
6mjpa	ABC TRANSPORTER ATP-BINDING PROTEIN	VIBRIO CHOLERAE	X-RAY	2.85	LMT
3oo6	ABC TRANSPORTER BINDING PROTEIN ACBH	ACTINOPLANES	X-RAY	2.15	GAL
2hyd	ABC TRANSPORTER HOMOLOG	STAPHYLOCOCCUS AUREUS	X-RAY	3	ADP
2vk2	ABC TRANSPORTER PERIPLASMIC-BINDING PROTEIN YTFQ	ESCHERICHIA COLI	X-RAY	1.2	GZL
4qc2	ABC TRANSPORTER RELATED PROTEIN	ESCHERICHIA COLI	X-RAY	2.22	ATP
4mrs	ABC TRANSPORTER RELATED PROTEIN	NOVOSPHINGOBIUM AROMATICIVORANS	X-RAY	2.35	GDS
4ywh	ABC TRANSPORTER SOLUTE BINDING PROTEIN	ACTINOBACILLUS SUCCINOGENES (STRAIN ATCC 55618	X-RAY	2.35	XYP
4wut	ABC TRANSPORTER SUBSTRATE BINDING PROTEIN (RIBOSE)	AGROBACTERIUM VITIS	X-RAY	1.5	FCB
5dkv	ABC TRANSPORTER SUBSTRATE BINDING PROTEIN (RIBOSE)	AGROBACTERIUM VITIS (STRAIN S4 / ATCC BAA-846)	X-RAY	1.68	T6T
4rya	ABC TRANSPORTER SUBSTRATE BINDING PROTEIN (SORBITOL)	AGROBACTERIUM VITIS S4	X-RAY	1.5	MTL
4i1d	ABC TRANSPORTER SUBSTRATE-BINDING PROTEIN	BRADYRHIZOBIUM JAPONICUM	X-RAY	2.2	GOL
4pfy	ABC TRANSPORTER SUBSTRATE-BINDING PROTEIN	THERMOTOGA MARITIMA	X-RAY	1.5	BMA
4eq9	ABC TRANSPORTER SUBSTRATE-BINDING PROTEIN-AMINO ACID	STREPTOCOCCUS PNEUMONIAE	X-RAY	1.4	GSH
4gnr	ABC TRANSPORTER SUBSTRATE-BINDING PROTEIN-BRANCHED CHAIN	STREPTOCOCCUS PNEUMONIAE	X-RAY	1	ILE
5jj5	ABC TRANSPORTER SUBSTRATE-BINDING PROTEIN-IRON TRANSPORT	STREPTOCOCCUS PNEUMONIAE	X-RAY	2.3	6L0
1oxv	ABC TRANSPORTER, ATP BINDING PROTEIN	SULFOLOBUS SOLFATARICUS	X-RAY	1.95	ANP
4dn7	ABC TRANSPORTER, ATP-BINDING PROTEIN	METHANOSARCINA MAZE	X-RAY	1.6	1PE
3qf4	ABC TRANSPORTER, ATP-BINDING PROTEIN	THERMOTOGA MARITIMA	X-RAY	2.9	ANP
5br1	ABC TRANSPORTER, BINDING PROTEIN	AGROBACTERIUM VITIS	X-RAY	1.85	X6X
5hko	ABC TRANSPORTER, CARBOHYDRATE UPTAKE TRANSPORTER-2 (CUT2)	MYCOBACTERIUM SMEGMATIS (STRAIN ATCC 700084 /	X-RAY	1.2	62W
4wed	ABC TRANSPORTER, PERIPLASMIC SOLUTE-BINDING PROTEIN	RHIZOBIUM MELILOTI	X-RAY	2.35	GOL
5t1p	ABC TRANSPORTER, PERIPLASMIC SUBSTRATE-BINDING PROTEIN	CAMPYLOBACTER JEJUNI BJ-CJGB96299	X-RAY	2	GPE
5t1pa	ABC TRANSPORTER, PERIPLASMIC SUBSTRATE-BINDING PROTEIN	CAMPYLOBACTER JEJUNI BJ-CJGB96299	X-RAY	2	BTB
3lvu	ABC TRANSPORTER, PERIPLASMIC SUBSTRATE-BINDING PROTEIN	SILICIBACTER POMEROYI	X-RAY	1.79	GOL
4y9t	ABC TRANSPORTER, SOLUTE BINDING PROTEIN	AGROBACTERIUM VITIS	X-RAY	1.8	PA1
2zzv	ABC TRANSPORTER, SOLUTE-BINDING PROTEIN	THERMUS THERMOPHILUS	X-RAY	1.4	LAC
4ne4	ABC TRANSPORTER, SUBSTRATE BINDING PROTEIN	AGROBACTERIUM FABRUM	X-RAY	1.73	BTB
3c9h	ABC TRANSPORTER, SUBSTRATE BINDING PROTEIN	AGROBACTERIUM TUMEFACIENS STR.	X-RAY	1.9	CIT
6i7w	ABC TRANSPORTER, SUBSTRATE BINDING PROTEIN (AGROCINOPINES A	AGROBACTERIUM FABRUM STR. C58	X-RAY	1.8	H6Q
4ra1	ABC TRANSPORTER, SUBSTRATE BINDING PROTEIN (AGROCINOPINES A	AGROBACTERIUM TUMEFACIENS	X-RAY	1.75	ALX
4zed	ABC TRANSPORTER, SUBSTRATE BINDING PROTEIN (AGROCINOPINES A	AGROBACTERIUM TUMEFACIENS (STRAIN C58 / ATCC	X-RAY	1.75	AGW
3ip5	ABC TRANSPORTER, SUBSTRATE BINDING PROTEIN (AMINO ACID)	AGROBACTERIUM TUMEFACIENS	X-RAY	1.35	ALA
4euo	ABC TRANSPORTER, SUBSTRATE BINDING PROTEIN (POLYAMINE)	AGROBACTERIUM TUMEFACIENS	X-RAY	1.28	ABU
5g62	ABC TRANSPORTER, SUBSTRATE-BINDING PROTEIN	STREPTOCOCCUS PNEUMONIAE	X-RAY	1.99	FNY
2uvj	ABC TYPE PERIPLASMIC SUGAR-BINDING PROTEIN	YERSINIA ENTEROCOLITICA	X-RAY	1.8	ADA
4s0f	ABC-TYPE BACTERIOCIN TRANSPORTER	RUMINICLOSTRIDIUM THERMOCELLUM ATCC 27405	X-RAY	5.51	AGS
4n03	ABC-TYPE BRANCHED-CHAIN AMINO ACID TRANSPORT SYSTEMS	THERMOMONOSPORA CURVATA	X-RAY	1.15	PLM
4fwi	ABC-TYPE DIPEPTIDE/OLIGOPEPTIDE/NICKEL TRANSPORT SYSTEM,	THERMOANAEROBACTER TENGCONGENSIS	X-RAY	2.89	ATP
4r75	ABC-TYPE FE3+ TRANSPORT SYSTEM, PERIPLASMIC COMPONENT	ACTINOBACILLUS PLEUROPNEUMONIAE	X-RAY	1.28	S7P
4ymu	ABC-TYPE POLAR AMINO ACID TRANSPORT SYSTEM, ATPASE	CALDANAEROBACTER SUBTERRANEUS SUBSP.	X-RAY	2.5	ATP
3ksm	ABC-TYPE SUGAR TRANSPORT SYSTEM, PERIPLASMIC COMPONENT	HAHELLA CHEJUENSIS	X-RAY	1.9	BDR
4qsc	ABC-TYPE SUGAR TRANSPORTER	AGROBACTERIUM FABRUM	X-RAY	1.3	N9S
4nmy	ABC-TYPE TRANSPORT SYSTEM, EXTRACELLULAR SOLUTE-BINDING	CLOSTRIDIUM DIFFICILE	X-RAY	1.9	VIB
6qee	ABCB1HM-EQ	MUS MUSCULUS	ELECTRON	3.9	ZQU
5np5	ABELSON TYROSINE-PROTEIN KINASE 2	HOMO SAPIENS	X-RAY	1.4	PTR
4r0c	ABGT PUTATIVE TRANSPORTER FAMILY	ALCANIVORAX BORKUMENSIS SK2	X-RAY	2.96	BOG
2p0x	ABIOTIC ATP-BINDING, FOLDING OPTIMIZED PROTEIN	SYNTHETIC GENE	SOLUTION		ATP
2g2h	ABL TYROSINE	HOMO SAPIENS	X-RAY	2	P16
1ziz	ABO BLOOD GROUP (TRANSFERASE A, ALPHA 1-3-N-	HOMO SAPIENS	X-RAY	1.49	GAL
3i0g	ABO GLYCOSYLTRANSFERASE	HOMO SAPIENS	X-RAY	1.4	UDP
4nzf	ABP, A GH27 BETA-L-ARABINOPYRANOSIDASE	GEOBACILLUS STEAROTHERMOPHILUS	X-RAY	2.19	ARB
4nzfa	ABP, A GH27 BETA-L-ARABINOPYRANOSIDASE	GEOBACILLUS STEAROTHERMOPHILUS	X-RAY	2.19	CIT
5itj	ABRB FAMILY TRANSCRIPTIONAL REGULATOR	SULFOLOBUS SOLFATARICUS	X-RAY	1.63	PG4
1abr	ABRIN-A	ABRUS PRECATORIUS	X-RAY	2.14	NDG
3nmn	ABSCISIC ACID RECEPTOR PYL1	ARABIDOPSIS THALIANA	X-RAY	2.15	PYV
3r6p	ABSCISIC ACID RECEPTOR PYL10	ARABIDOPSIS THALIANA	X-RAY	2.7	A8S
3ns2	ABSCISIC ACID RECEPTOR PYL2	ARABIDOPSIS THALIANA	X-RAY	1.63	PYV
3oji	ABSCISIC ACID RECEPTOR PYL3	ARABIDOPSIS THALIANA	X-RAY	1.84	PYV
3w9r	ABSCISIC ACID RECEPTOR PYL9	ARABIDOPSIS THALIANA	X-RAY	1.9	A8S
3w9ra	ABSCISIC ACID RECEPTOR PYL9	ARABIDOPSIS THALIANA	X-RAY	1.9	P6G
5ur4	ABSCISIC ACID RECEPTOR PYR1	ARABIDOPSIS THALIANA	X-RAY	1.52	PYV
5df0	AC-CHIA	AUTOGRAPHA CALIFORNICA NUCLEAR POLYHEDROSIS	X-RAY	3.25	58Y
5lu8	AC-TYR-VAL-ALA-ASP-CHLOROMETHYLKETONE	HOMO SAPIENS	X-RAY	1.95	5KN
3jzj	ACARBOSE/MALTOSE BINDING PROTEIN GACH	STREPTOMYCES GLAUCESCENS	X-RAY	1.4	ACR
4g2r	ACCD6, CARBOXYLTRANSFERASE BETA-SUBUNIT OF ACYL-COA	MYCOBACTERIUM TUBERCULOSIS	X-RAY	2.28	H1L
4nto	ACCELERATED-CELL-DEATH 11	ARABIDOPSIS THALIANA	X-RAY	2.15	1PW
4jb7	ACCESSORY COLONIZATION FACTOR ACFC	VIBRIO CHOLERAE O1	X-RAY	1.42	MLT
4bxi	ACCESSORY GENE REGULATOR PROTEIN C	STAPHYLOCOCCUS AUREUS	X-RAY	2.2	GOL
4gpl	ACE-PTR-THR-PRO-GLU-PRO, PEPTIDE INHIBITOR	HOMO SAPIENS	X-RAY	3	A
3up3	ACEDAF-12	HOMO SAPIENS	X-RAY	1.25	XCA
5j78	ACETALDEHYDE DEHYDROGENASE (ACETYLATING)	GEOBACILLUS THERMOGLUCOSIDASIUS	X-RAY	2.1	GOL
1tuu	ACETATE KINASE	METHANOSARCINA THERMOPHILA	X-RAY	2.5	ADP
1tuua	ACETATE KINASE	METHANOSARCINA THERMOPHILA	X-RAY	2.5	AMP
4iz9	ACETATE KINASE	MYCOBACTERIUM AVIUM	X-RAY	1.98	APC
3sk3	ACETATE KINASE	SALMONELLA ENTERICA SUBSP. ENTERICA SEROVAR	X-RAY	1.9	CIT
5b5s	ACETIC ACID	TALAROMYCES CELLULOLYTICUS	X-RAY	1.5	BOG
3bh3	ACETOACETATE DECARBOXYLASE	CHROMOBACTERIUM VIOLACEUM ATCC 12472	X-RAY	2.1	PNH
3cmb	ACETOACETATE DECARBOXYLASE	METHANOCULLEUS MARISNIGRI JR1	X-RAY	1.6	P33
4zbo	ACETOACETATE DECARBOXYLASE	STREPTOMYCES BINGCHENGGENSIS (STRAIN BCW-1)	X-RAY	1.4	ETE
3c8w	ACETOACETATE DECARBOXYLASE ADC	LEGIONELLA PNEUMOPHILA SUBSP. PNEUMOPHILA STR.	X-RAY	1.6	CIT
5vt6	ACETOACETYL-COA REDUCTASE	BURKHOLDERIA PSEUDOMALLEI (STRAIN 1710B)	X-RAY	1.7	NAP
3vzp	ACETOACETYL-COA REDUCTASE	CUPRIAVIDUS NECATOR	X-RAY	1.79	DIO
4n5m	ACETOACETYL-COA REDUCTASE	RALSTONIA EUTROPHA	X-RAY	1.34	CAA
6esq	ACETOACETYL-COA THIOLASE	METHANOTHERMOCOCCUS THERMOLITHOTROPHICUS	X-RAY	2.95	COA
1qmg	ACETOHYDROXY-ACID ISOMEROREDUCTASE	SPINACIA OLERACEA	X-RAY	1.6	APX
1qmga	ACETOHYDROXY-ACID ISOMEROREDUCTASE	SPINACIA OLERACEA	X-RAY	1.6	DMV
1jsc	ACETOHYDROXY-ACID SYNTHASE	SACCHAROMYCES CEREVISIAE	X-RAY	2.6	TPP
1jsca	ACETOHYDROXY-ACID SYNTHASE	SACCHAROMYCES CEREVISIAE	X-RAY	2.6	FAD
1geg	ACETOIN REDUCTASE	KLEBSIELLA PNEUMONIAE	X-RAY	1.7	NAD
5li3	ACETOIN UTILIZATION PROTEIN	PSEUDOMONAS AERUGINOSA	X-RAY	2.4	9RB
1yi0	ACETOLACTATE SYNTHASE	ARABIDOPSIS THALIANA	X-RAY	2.7	1SM
1yi0a	ACETOLACTATE SYNTHASE	ARABIDOPSIS THALIANA	X-RAY	2.7	FAD
4rjj	ACETOLACTATE SYNTHASE	BACILLUS SUBTILIS	X-RAY	2.34	TPP
6den	ACETOLACTATE SYNTHASE	CANDIDA ALBICANS (STRAIN SC5314 / ATCC MYA-	X-RAY	1.81	G8A
6dena	ACETOLACTATE SYNTHASE	CANDIDA ALBICANS (STRAIN SC5314 / ATCC MYA-	X-RAY	1.81	FAD
6denb	ACETOLACTATE SYNTHASE	CANDIDA ALBICANS (STRAIN SC5314 / ATCC MYA-	X-RAY	1.81	TP9
1n0h	ACETOLACTATE SYNTHASE	SACCHAROMYCES CEREVISIAE	X-RAY	2.8	CIE
1n0ha	ACETOLACTATE SYNTHASE	SACCHAROMYCES CEREVISIAE	X-RAY	2.8	AYD
1n0hb	ACETOLACTATE SYNTHASE	SACCHAROMYCES CEREVISIAE	X-RAY	2.8	FAD
1n0hc	ACETOLACTATE SYNTHASE	SACCHAROMYCES CEREVISIAE	X-RAY	2.8	TPP
6bd9	ACETOLACTATE SYNTHASE CATALYTIC SUBUNIT, MITOCHONDRIAL	SACCHAROMYCES CEREVISIAE	X-RAY	1.98	FAD
6bd9a	ACETOLACTATE SYNTHASE CATALYTIC SUBUNIT, MITOCHONDRIAL	SACCHAROMYCES CEREVISIAE	X-RAY	1.98	TPP
5ims	ACETOLACTATE SYNTHASE CATALYTIC SUBUNIT, MITOCHONDRIAL	SACCHAROMYCES CEREVISIAE (STRAIN ATCC 204508 /	X-RAY	1.98	FAD
5imsa	ACETOLACTATE SYNTHASE CATALYTIC SUBUNIT, MITOCHONDRIAL	SACCHAROMYCES CEREVISIAE (STRAIN ATCC 204508 /	X-RAY	1.98	TPP
5ahk	ACETOLACTATE SYNTHASE II, LARGE SUBUNIT	PSEUDOMONAS PROTEGENS	X-RAY	1.55	FAD
5ahka	ACETOLACTATE SYNTHASE II, LARGE SUBUNIT	PSEUDOMONAS PROTEGENS	X-RAY	1.55	TPP
5yum	ACETOLACTATE SYNTHASE ISOZYME 1 SMALL SUBUNIT	ESCHERICHIA COLI (STRAIN K12)	X-RAY	2.43	ILE
2f1f	ACETOLACTATE SYNTHASE ISOZYME III SMALL SUBUNIT	ESCHERICHIA COLI	X-RAY	1.75	1PE
5dx6	ACETOLACTATE SYNTHASE, CATABOLIC	KLEBSIELLA PNEUMONIAE	X-RAY	1.75	5GY
5dx6a	ACETOLACTATE SYNTHASE, CATABOLIC	KLEBSIELLA PNEUMONIAE	X-RAY	1.75	TPP
1ybh	ACETOLACTATE SYNTHASE, CHLOROPLAST	ARABIDOPSIS THALIANA	X-RAY	2.5	CIE
1ybha	ACETOLACTATE SYNTHASE, CHLOROPLAST	ARABIDOPSIS THALIANA	X-RAY	2.5	FAD
1ybhb	ACETOLACTATE SYNTHASE, CHLOROPLAST	ARABIDOPSIS THALIANA	X-RAY	2.5	P22
1t9b	ACETOLACTATE SYNTHASE, MITOCHONDRIAL	SACCHAROMYCES CEREVISIAE	X-RAY	2.2	1CS
1t9ba	ACETOLACTATE SYNTHASE, MITOCHONDRIAL	SACCHAROMYCES CEREVISIAE	X-RAY	2.2	FAD
1t9bb	ACETOLACTATE SYNTHASE, MITOCHONDRIAL	SACCHAROMYCES CEREVISIAE	X-RAY	2.2	P22
1t9bc	ACETOLACTATE SYNTHASE, MITOCHONDRIAL	SACCHAROMYCES CEREVISIAE	X-RAY	2.2	YF3
5svb	ACETONE CARBOXYLASE ALPHA SUBUNIT	XANTHOBACTER AUTOTROPHICUS (STRAIN ATCC BAA-	X-RAY	2.65	AMP
5m45	ACETONE CARBOXYLASE ALPHA SUBUNIT	XANTHOBACTER AUTOTROPHICUS PY2	X-RAY	1.87	AMP
5l9w	ACETOPHENONE CARBOXYLASE DELTA SUBUNIT	AROMATOLEUM AROMATICUM (STRAIN EBN1)	X-RAY	2.9	ADP
5l9wa	ACETOPHENONE CARBOXYLASE DELTA SUBUNIT	AROMATOLEUM AROMATICUM (STRAIN EBN1)	X-RAY	2.9	EPE
4krx	ACETYL ESTERASE	ESCHERICHIA COLI	X-RAY	1.8	PG4
1s7f	ACETYL TRANSFERASE	SALMONELLA TYPHIMURIUM	X-RAY	2	MLA
3fvr	ACETYL XYLAN ESTERASE	BACILLUS PUMILUS	X-RAY	2.5	PG4
1vlq	ACETYL XYLAN ESTERASE	THERMOTOGA MARITIMA	X-RAY	2.1	GOL
1qoz	ACETYL XYLAN ESTERASE	TRICHODERMA REESEI	X-RAY	1.9	NAG
6arl	ACETYL-COA ACETYLTRANSFERASE	ASPERGILLUS FUMIGATUS AF293	X-RAY	1.9	GOL
4xl4	ACETYL-COA ACETYLTRANSFERASE	CLOSTRIDIUM ACETOBUTYLICUM (STRAIN EA 2018)	X-RAY	1.9	COA
6bn2	ACETYL-COA ACETYLTRANSFERASE	ELIZABETHKINGIA ANOPHELIS NUHP1	X-RAY	1.65	GOL
5f38	ACETYL-COA ACETYLTRANSFERASE	ESCHERICHIA COLI K-12	X-RAY	1.9	COZ
5f38a	ACETYL-COA ACETYLTRANSFERASE	ESCHERICHIA COLI K-12	X-RAY	1.9	5UG
2iby	ACETYL-COA ACETYLTRANSFERASE	HOMO SAPIENS	X-RAY	1.85	COA
6aqp	ACETYL-COA ACETYLTRANSFERASE	NEOSARTORYA FUMIGATA (STRAIN ATCC MYA-4609 /	X-RAY	1.8	COA
6aqpa	ACETYL-COA ACETYLTRANSFERASE	NEOSARTORYA FUMIGATA (STRAIN ATCC MYA-4609 /	X-RAY	1.8	ACO
6arr	ACETYL-COA ACETYLTRANSFERASE	NEOSARTORYA FUMIGATA (STRAIN ATCC MYA-4609 /	X-RAY	1.82	GOL
4o9c	ACETYL-COA ACETYLTRANSFERASE	RALSTONIA EUTROPHA	X-RAY	2	COA
2vu1	ACETYL-COA ACETYLTRANSFERASE	ZOOGLOEA RAMIGERA	X-RAY	1.51	OPI
6bjb	ACETYL-COA ACETYLTRANSFERASE A	ASCARIS SUUM	X-RAY	1.5	1VU
4ubt	ACETYL-COA ACETYLTRANSFERASE FADA5	MYCOBACTERIUM TUBERCULOSIS	X-RAY	1.7	COA
4ubta	ACETYL-COA ACETYLTRANSFERASE FADA5	MYCOBACTERIUM TUBERCULOSIS	X-RAY	1.7	3G6
6are	ACETYL-COA ACETYLTRANSFERASE, ACETYLATED ENZYME	ASPERGILLUS FUMIGATUS AF293	X-RAY	1.75	COA
6area	ACETYL-COA ACETYLTRANSFERASE, ACETYLATED ENZYME	ASPERGILLUS FUMIGATUS AF293	X-RAY	1.75	ACO
2f2s	ACETYL-COA ACETYLTRANSFERASE, MITOCHONDRIAL	HOMO SAPIENS	X-RAY	2	COA
2x24	ACETYL-COA CARBOXYLASE	BOS TAURUS	X-RAY	2.4	X24
1bdo	ACETYL-COA CARBOXYLASE	ESCHERICHIA COLI	X-RAY	1.8	BTN
4wz8	ACETYL-COA CARBOXYLASE	SACCHAROMYCES CEREVISIAE	X-RAY	2.23	3W7
5csl	ACETYL-COA CARBOXYLASE	SACCHAROMYCES CEREVISIAE (STRAIN ATCC 204508 /	X-RAY	3.2	BTI
5csla	ACETYL-COA CARBOXYLASE	SACCHAROMYCES CEREVISIAE (STRAIN ATCC 204508 /	X-RAY	3.2	COA
3tvu	ACETYL-COA CARBOXYLASE	SACCHAROMYCES CEREVISIAE S288C	X-RAY	2.4	B37
2vpq	ACETYL-COA CARBOXYLASE	STAPHYLOCOCCUS AUREUS	X-RAY	2.1	ANP
3gid	ACETYL-COA CARBOXYLASE 2	HOMO SAPIENS	X-RAY	2.3	S1A
3cf4	ACETYL-COA DECARBOXYLASE/SYNTHASE ALPHA SUBUNIT	METHANOSARCINA BARKERI	X-RAY	2	GOL
3cf4a	ACETYL-COA DECARBOXYLASE/SYNTHASE ALPHA SUBUNIT	METHANOSARCINA BARKERI	X-RAY	2	PEG
5ddk	ACETYL-COA HYDROLASE	ACETOBACTER ACETI 1023	X-RAY	2.13	COA
1ru3	ACETYL-COA SYNTHASE	CARBOXYDOTHERMUS HYDROGENOFORMANS	X-RAY	2.2	SF4
1pg4	ACETYL-COA SYNTHETASE	SALMONELLA ENTERICA	X-RAY	1.75	COA
1pg4a	ACETYL-COA SYNTHETASE	SALMONELLA ENTERICA	X-RAY	1.75	PRX
2vat	ACETYL-COA--DEACETYLCEPHALOSPORIN C ACETYLTRANSFERASE	ACREMONIUM CHRYSOGENUM	X-RAY	2.2	COA
1wl4	ACETYL-COENZYME A ACETYLTRANSFERASE 2	HOMO SAPIENS	X-RAY	1.55	COA
1w96	ACETYL-COENZYME A CARBOXYLASE	SACCHAROMYCES CEREVISIAE	X-RAY	1.8	S1A
5kdr	ACETYL-COENZYME A CARBOXYLASE CARBOXYL TRANSFERASE SUBUNIT	STAPHYLOCOCCUS AUREUS (STRAIN BOVINE RF122 /	X-RAY	2.6	YT5
5ifi	ACETYL-COENZYME A SYNTHETASE	CRYPTOCOCCUS NEOFORMANS VAR. GRUBII SEROTYPE A	X-RAY	1.95	PRX
6eqo	ACETYL-COENZYME A SYNTHETASE	ERYTHROBACTER SP. NAP1	X-RAY	2.7	ACP
6eqoa	ACETYL-COENZYME A SYNTHETASE	ERYTHROBACTER SP. NAP1	X-RAY	2.7	NAP
2p2m	ACETYL-COENZYME A SYNTHETASE	SALMONELLA TYPHIMURIUM	X-RAY	2.11	PRX
5jrh	ACETYL-COENZYME A SYNTHETASE	SALMONELLA TYPHIMURIUM (STRAIN LT2 / SGSC1412 /	X-RAY	1.64	COA
5jrha	ACETYL-COENZYME A SYNTHETASE	SALMONELLA TYPHIMURIUM (STRAIN LT2 / SGSC1412 /	X-RAY	1.64	CMP
1ry2	ACETYL-COENZYME A SYNTHETASE 1	SACCHAROMYCES CEREVISIAE	X-RAY	2.3	AMP
1hcs	ACETYL-PYEEIE-OH	HOMO SAPIENS	SOLUTION		A
4dev	ACETYL-XYLAN ESTERASE EST2A	BUTYRIVIBRIO PROTEOCLASTICUS	X-RAY	2	ACY
5oui	ACETYLCHOLINE BINDING PROTEIN	HOMO SAPIENS, LYMNAEA STAGNALIS	X-RAY	3.1	AVB
1ux2	ACETYLCHOLINE BINDING PROTEIN	LYMNAEA STAGNALIS	X-RAY	2.2	EPE
4zjs	ACETYLCHOLINE RECEPTOR SUBUNIT ALPHA,SOLUBLE ACETYLCHOLINE	HOMO SAPIENS, APLYSIA CALIFORNICA	X-RAY	2.23	4P0
2bys	ACETYLCHOLINE-BINDING PROTEIN	APLYSIA CALIFORNICA	X-RAY	2.05	LOB
2bj0	ACETYLCHOLINE-BINDING PROTEIN	BULINUS TRUNCATUS	X-RAY	2	CXS
4zk1	ACETYLCHOLINE-BINDING PROTEIN	LYMNAEA STAGNALIS	X-RAY	1.75	4P7
5afn	ACETYLCHOLINE-BINDING PROTEIN, NEURONAL ACETYLCHOLINE	HOMO SAPIENS, LYMNAEA STAGNALIS	X-RAY	2.15	L0B
5afna	ACETYLCHOLINE-BINDING PROTEIN, NEURONAL ACETYLCHOLINE	HOMO SAPIENS, LYMNAEA STAGNALIS	X-RAY	2.15	OJD
6ary	ACETYLCHOLINESTERASE	ANOPHELES GAMBIAE	X-RAY	2.26	BT7
4bdt	ACETYLCHOLINESTERASE	DENDROASPIS ANGUSTICEPS	X-RAY	3.1	HUW
1dx4	ACETYLCHOLINESTERASE	DROSOPHILA MELANOGASTER	X-RAY	2.7	760
4m0e	ACETYLCHOLINESTERASE	HOMO SAPIENS	X-RAY	2	1YL
2ha2	ACETYLCHOLINESTERASE	MUS MUSCULUS	X-RAY	2.05	SCK, SCU
2ha2a	ACETYLCHOLINESTERASE	MUS MUSCULUS	X-RAY	2.05	P6G
6g1u	ACETYLCHOLINESTERASE	TETRONARCE CALIFORNICA	X-RAY	1.79	E1K
2c5g	ACETYLCHOLINESTERASE	TORPEDO CALIFORNICA	X-RAY	1.95	ETM
2e7z	ACETYLENE HYDRATASE AHY	PELOBACTER ACETYLENICUS	X-RAY	1.26	MGD
2e7za	ACETYLENE HYDRATASE AHY	PELOBACTER ACETYLENICUS	X-RAY	1.26	MPD
1gs5	ACETYLGLUTAMATE KINASE	ESCHERICHIA COLI	X-RAY	1.5	ANP
1gs5a	ACETYLGLUTAMATE KINASE	ESCHERICHIA COLI	X-RAY	1.5	NLG
2buf	ACETYLGLUTAMATE KINASE	PSEUDOMONAS AERUGINOSA	X-RAY	2.95	NLG
2bufa	ACETYLGLUTAMATE KINASE	PSEUDOMONAS AERUGINOSA	X-RAY	2.95	ADP
3zzh	ACETYLGLUTAMATE KINASE	SACCHAROMYCES CEREVISIAE	X-RAY	2.1	MLI
3zzha	ACETYLGLUTAMATE KINASE	SACCHAROMYCES CEREVISIAE	X-RAY	2.1	NLG
3l86	ACETYLGLUTAMATE KINASE	STREPTOCOCCUS MUTANS	X-RAY	2.06	ADP
3l86a	ACETYLGLUTAMATE KINASE	STREPTOCOCCUS MUTANS	X-RAY	2.06	NLG
2v5h	ACETYLGLUTAMATE KINASE	SYNECHOCOCCUS ELONGATUS	X-RAY	2.75	NLG
2bty	ACETYLGLUTAMATE KINASE	THERMOTOGA MARITIMA	X-RAY	2.75	ARG
2btya	ACETYLGLUTAMATE KINASE	THERMOTOGA MARITIMA	X-RAY	2.75	NLG
4nf1	ACETYLGLUTAMATE KINASE	XYLELLA FASTIDIOSA TEMECULA1	X-RAY	1.4	NLG
3t7b	ACETYLGLUTAMATE KINASE	YERSINIA PESTIS	X-RAY	2.5	GLU
2rd5	ACETYLGLUTAMATE KINASE-LIKE PROTEIN	ARABIDOPSIS THALIANA	X-RAY	2.51	ADP
2rd5a	ACETYLGLUTAMATE KINASE-LIKE PROTEIN	ARABIDOPSIS THALIANA	X-RAY	2.51	NLG
2rd5b	ACETYLGLUTAMATE KINASE-LIKE PROTEIN	ARABIDOPSIS THALIANA	X-RAY	2.51	ATP
4usj	ACETYLGLUTAMATE KINASE, CHLOROPLASTIC	CHLAMYDOMONAS REINHARDTII	X-RAY	2.85	ADP
4usja	ACETYLGLUTAMATE KINASE, CHLOROPLASTIC	CHLAMYDOMONAS REINHARDTII	X-RAY	2.85	NLG
4usjb	ACETYLGLUTAMATE KINASE, CHLOROPLASTIC	CHLAMYDOMONAS REINHARDTII	X-RAY	2.85	X2W
4usjc	ACETYLGLUTAMATE KINASE, CHLOROPLASTIC	CHLAMYDOMONAS REINHARDTII	X-RAY	2.85	ATP
2eh6	ACETYLORNITHINE AMINOTRANSFERASE	AQUIFEX AEOLICUS	X-RAY	1.9	PLP
5viu	ACETYLORNITHINE AMINOTRANSFERASE	ELIZABETHKINGIA ANOPHELIS	X-RAY	1.65	CIT
2ord	ACETYLORNITHINE AMINOTRANSFERASE	THERMOTOGA MARITIMA MSB8	X-RAY	1.4	PLP
1vef	ACETYLORNITHINE/ACETYL-LYSINE AMINOTRANSFERASE	THERMUS THERMOPHILUS	X-RAY	1.35	PLP
4jf1	ACETYLORNITHINE/SUCCINYLDIAMINOPIMELATE AMINOTRANSFERASE	SALMONELLA TYPHIMURIUM	X-RAY	1.28	PLP
4zur	ACETYLPOLYAMINE AMINOHYDROLASE	MYCOPLANA RAMOSA	X-RAY	1.13	7XA
2fsr	ACETYLTRANSFERASE	AGROBACTERIUM TUMEFACIENS STR.	X-RAY	1.52	PEG
4zbg	ACETYLTRANSFERASE	BRUCELLA ABORTUS STR. 2308 A	X-RAY	1.25	ACO
3bsy	ACETYLTRANSFERASE	CAMPYLOBACTER JEJUNI	X-RAY	1.8	ACO
6ao7	ACETYLTRANSFERASE	ELIZABETHKINGIA ANOPHELIS	X-RAY	1.85	ACO
5xun	ACETYLTRANSFERASE	KLEBSIELLA PNEUMONIAE	X-RAY	2	ACO
3zj0	ACETYLTRANSFERASE	OCEANICOLA GRANULOSUS	X-RAY	1.8	ACO
1ghe	ACETYLTRANSFERASE	PSEUDOMONAS SYRINGAE PV. TABACI	X-RAY	1.55	ACO
6g96	ACETYLTRANSFERASE	SALMONELLA TYPHIMURIUM	X-RAY	1.48	ACO
4jxr	ACETYLTRANSFERASE	SINORHIZOBIUM MELILOTI	X-RAY	1.15	ACO
4jxra	ACETYLTRANSFERASE	SINORHIZOBIUM MELILOTI	X-RAY	1.15	FLC
3ne7	ACETYLTRANSFERASE	THERMOPLASMA ACIDOPHILUM	X-RAY	2.3	COA
2vi7	ACETYLTRANSFERASE PA1377	PSEUDOMONAS AERUGINOSA	X-RAY	2.25	GOL
6edv	ACETYLTRANSFERASE PA3944	PSEUDOMONAS AERUGINOSA (STRAIN ATCC 15692 / DSM	X-RAY	1.35	`COA
5vd6	ACETYLTRANSFERASE PA4794	PSEUDOMONAS AERUGINOSA (STRAIN ATCC 15692 / DSM	X-RAY	1.2	93P
2j8m	ACETYLTRANSFERASE PA4866 FROM P. AERUGINOSA	PSEUDOMONAS AERUGINOSA	X-RAY	1.44	GOL
5jph	ACETYLTRANSFERASE SACOL1063	STAPHYLOCOCCUS AUREUS	X-RAY	1.46	COA
4qvt	ACETYLTRANSFERASE YPEA	ESCHERICHIA COLI K-12	X-RAY	1.95	ACO
3fbu	ACETYLTRANSFERASE, GNAT FAMILY	BACILLUS ANTHRACIS STR. STERNE	X-RAY	1.8	COA
2ae6	ACETYLTRANSFERASE, GNAT FAMILY	ENTEROCOCCUS FAECALIS	X-RAY	2.19	GOL
2h5m	ACETYLTRANSFERASE, GNAT FAMILY	STAPHYLOCOCCUS AUREUS SUBSP. AUREUS	SOLUTION		ACO
2q7b	ACETYLTRANSFERASE, GNAT FAMILY	STREPTOCOCCUS AGALACTIAE 2603V/R	X-RAY	2	FLC
2i79	ACETYLTRANSFERASE, GNAT FAMILY	STREPTOCOCCUS PNEUMONIAE	X-RAY	2.1	ACO
6c37	ACETYLTRANSFERASE, GNAT FAMILY PROTEIN	MYCOBACTERIUM SMEGMATIS	X-RAY	1.7	5NG
2ymv	ACG NITROREDUCTASE	MYCOBACTERIUM SMEGMATIS	X-RAY	1.6	FNR
4afh	ACHBP	CAPITELLA TELETA	X-RAY	1.88	L0B
1arc	ACHROMOBACTER PROTEASE I	ACHROMOBACTER LYTICUS	X-RAY	2	TCK
5u84	ACID CERAMIDASE	BALAENOPTERA ACUTOROSTRATA	X-RAY	2.34	I3C
5u81	ACID CERAMIDASE ISOFORM B	HETEROCEPHALUS GLABER	X-RAY	1.4	GOL
6mhm	ACID CERAMIDASE SUBUNIT ALPHA	HOMO SAPIENS	X-RAY	2.74	JRY
3ntl	ACID GLUCOSE-1-PHOSPHATE PHOSPHATASE	ENTEROBACTER CLOACAE	X-RAY	1.88	IHP
3it3	ACID PHOSPHATASE	FRANCISELLA TULARENSIS SUBSP. HOLARCTICA	X-RAY	1.5	3AM
5ebb	ACID SPHINGOMYELINASE-LIKE PHOSPHODIESTERASE 3A	HOMO SAPIENS	X-RAY	2.6	MLI
5fcb	ACID SPHINGOMYELINASE-LIKE PHOSPHODIESTERASE 3A	MUS MUSCULUS	X-RAY	1.55	AMP
5kar	ACID SPHINGOMYELINASE-LIKE PHOSPHODIESTERASE 3B	MUS MUSCULUS	X-RAY	1.14	GOL
6nsj	ACID-ACTIVATED UREA CHANNEL	HELICOBACTER PYLORI (STRAIN J99 / ATCC 700824)	ELECTRON	2.7	XP4
2qts	ACID-SENSING ION CHANNEL	GALLUS GALLUS	X-RAY	1.9	MAL
4ntw	ACID-SENSING ION CHANNEL 1	MICRURUS TENER TENER	X-RAY	2.07	P6G
6enz	ACIDIC AMINO ACID DECARBOXYLASE GADL1	MUS MUSCULUS	X-RAY	3	PLP
1afc	ACIDIC FIBROBLAST GROWTH FACTOR	BOS TAURUS	X-RAY	2.7	SCR
1rml	ACIDIC FIBROBLAST GROWTH FACTOR	HOMO SAPIENS	SOLUTION		NTS
1f9k	ACIDIC LECTIN	PSOPHOCARPUS TETRAGONOLOBUS	X-RAY	3	AMG
3fy1	ACIDIC MAMMALIAN CHITINASE	HOMO SAPIENS	X-RAY	1.7	AMI
5c5v	ACIDOCALCISOMAL PYROPHOSPHATASE	TRYPANOSOMA BRUCEI BRUCEI (STRAIN 927/4	X-RAY	2.35	2PN
5cuv	ACIDOCALCISOMAL PYROPHOSPHATASE	TRYPANOSOMA CRUZI	X-RAY	2.62	MLT
1vr3	ACIREDUCTONE DIOXYGENASE	MUS MUSCULUS	X-RAY	2.06	UNL
3r9p	ACKA	MYCOBACTERIUM AVIUM SUBSP. PARATUBERCULOSIS	X-RAY	1.9	PGE
1q0r	ACLACINOMYCIN METHYLESTERASE	STREPTOMYCES PURPURASCENS	X-RAY	1.45	AKT
1q0ra	ACLACINOMYCIN METHYLESTERASE	STREPTOMYCES PURPURASCENS	X-RAY	1.45	1PE
2ipi	ACLACINOMYCIN OXIDOREDUCTASE (AKNOX)	STREPTOMYCES GALILAEUS	X-RAY	1.65	AKY
2ipia	ACLACINOMYCIN OXIDOREDUCTASE (AKNOX)	STREPTOMYCES GALILAEUS	X-RAY	1.65	FAD
1qzz	ACLACINOMYCIN-10-HYDROXYLASE	STREPTOMYCES PURPURASCENS	X-RAY	2.1	SAM
2gey	ACLR PROTEIN	STREPTOMYCES GALILAEUS	X-RAY	1.8	PG4, GOL
8acn	ACONITASE	BOS TAURUS	X-RAY	2	NIC
7acn	ACONITASE	SUS SCROFA	X-RAY	2	ICT
1l5j	ACONITATE HYDRATASE 2	ESCHERICHIA COLI	X-RAY	2.4	TRA
4i4j	ACP-POLYENE THIOESTERASE	STREPTOMYCES GLOBISPORUS	X-RAY	2.78	TAR
2k33	ACRA	CAMPYLOBACTER JEJUNI	SOLUTION		B6D
3lhq	ACRAB OPERON REPRESSOR (TETR/ACRR FAMILY)	SALMONELLA ENTERICA SUBSP. ENTERICA SEROVAR	X-RAY	1.56	PEG
2drd	ACRB	ESCHERICHIA COLI	X-RAY	3.1	MIY
5gxe	ACRYLYL-COA REDUCTASE ACUI	RUEGERIA POMEROYI (STRAIN ATCC 700808 / DSM	X-RAY	1.7	NAP
2x3j	ACSD	ERWINIA CHRYSANTHEMI	X-RAY	2	ATP
1n5q	ACTAVA-ORF6 MONOOXYGENASE	STREPTOMYCES COELICOLOR	X-RAY	1.74	TNC
1n5qa	ACTAVA-ORF6 MONOOXYGENASE	STREPTOMYCES COELICOLOR	X-RAY	1.74	P6G
3d3z	ACTIBIND	ASPERGILLUS NIGER	X-RAY	1.7	D3Z
3b6c	ACTII PROTEIN	STREPTOMYCES COELICOLOR	X-RAY	2.3	SDN
1atn	ACTIN	BOS TAURUS	X-RAY	2.8	ATP
1nlv	ACTIN	HOMO SAPIENS	X-RAY	1.8	ATP
2q0u	ACTIN	ORYCTOLAGUS CUNICULUS	X-RAY	1.45	ATP
2q0ua	ACTIN	ORYCTOLAGUS CUNICULUS	X-RAY	1.45	LAB
5ce3	ACTIN	YERSINIA ENTEROCOLITICA	X-RAY	2.93	ATP
5ce3a	ACTIN	YERSINIA ENTEROCOLITICA	X-RAY	2.93	ADP
1j6z	ACTIN ALPHA 1	ORYCTOLAGUS CUNICULUS	X-RAY	1.54	ADP
1j6za	ACTIN ALPHA 1	ORYCTOLAGUS CUNICULUS	X-RAY	1.54	RHO
1f7s	ACTIN DEPOLYMERIZING FACTOR (ADF)	ARABIDOPSIS THALIANA	X-RAY	2	LDA
6mbk	ACTIN PEPTIDE	HOMO SAPIENS	X-RAY	1.69	SAH
4cbu	ACTIN-1	MUS MUSCULUS	X-RAY	1.3	ATP
5ogw	ACTIN-1	PLASMODIUM FALCIPARUM (ISOLATE HB3)	ELECTRON	3.8	ADP
5ogwa	ACTIN-1	PLASMODIUM FALCIPARUM (ISOLATE HB3)	ELECTRON	3.8	9UE
4cbx	ACTIN-2	MUS MUSCULUS	X-RAY	2.2	ATP
3eks	ACTIN-5C	DROSOPHILA MELANOGASTER	X-RAY	1.8	ATP
3eksa	ACTIN-5C	DROSOPHILA MELANOGASTER	X-RAY	1.8	CY9
4rwt	ACTIN-5C	HOMO SAPIENS	X-RAY	2.98	ANP
4jhd	ACTIN-5C	MUS MUSCULUS	X-RAY	2.91	ANP
4liz	ACTIN-BINDING PROTEIN, COFILIN/TROPOMYOSIN FAMILY PROTEIN,	ENTAMOEBA HISTOLYTICA	X-RAY	1.5	EPE
5ljw	ACTIN-LIKE ATPASE	MAGNETOSPIRILLUM MAGNETICUM AMB-1	X-RAY	1.8	ANP
2p9i	ACTIN-LIKE PROTEIN 3	BOS TAURUS	X-RAY	2.46	ADP
3wee	ACTIN-LIKE PROTEIN ARP9	SACCHAROMYCES CEREVISIAE	X-RAY	3.1	CXS
3ukr	ACTIN-RELATED PROTEIN 3	BOS TAURUS	X-RAY	2.48	CKH
2020-12-06	ACTIN-RELATED PROTEIN 3	HOMO SAPIENS	X-RAY	4.6	ATP
4jd2	ACTIN-RELATED PROTEIN 3	MUS MUSCULUS	X-RAY	3.08	ATP
3dwl	ACTIN-RELATED PROTEIN 3	SCHIZOSACCHAROMYCES POMBE	X-RAY	3.78	ATP
3qb0	ACTIN-RELATED PROTEIN 4	SACCHAROMYCES CEREVISIAE	X-RAY	3.4	ATP
5nbl	ACTIN-RELATED PROTEIN 4	TRICHOPLUSIA NI	X-RAY	2.8	ATP
4fo0	ACTIN-RELATED PROTEIN 8	HOMO SAPIENS	X-RAY	2.6	ATP
6c1d	ACTIN, ALPHA SKELETAL MUSCLE	AMANITA PHALLOIDES	ELECTRON	3.2	ADP
2a40	ACTIN, ALPHA SKELETAL MUSCLE	BOS TAURUS	X-RAY	1.8	ATP
4a7f	ACTIN, ALPHA SKELETAL MUSCLE	DICTYOSTELIUM DISCOIDEUM	ELECTRON	7.7	ADP
3sjh	ACTIN, ALPHA SKELETAL MUSCLE	DROSOPHILA MELANOGASTER, BOS TAURUS	X-RAY	1.75	ATP
3sjha	ACTIN, ALPHA SKELETAL MUSCLE	DROSOPHILA MELANOGASTER, BOS TAURUS	X-RAY	1.75	LAR
6djm	ACTIN, ALPHA SKELETAL MUSCLE	GALLUS GALLUS	ELECTRON	3.1	ANP
2pbd	ACTIN, ALPHA SKELETAL MUSCLE	HOMO SAPIENS	X-RAY	1.5	ATP
3tu5	ACTIN, ALPHA SKELETAL MUSCLE	HOMO SAPIENS, MUS MUSCULUS	X-RAY	3	ATP
3tu5a	ACTIN, ALPHA SKELETAL MUSCLE	HOMO SAPIENS, MUS MUSCULUS	X-RAY	3	MPD
5yee	ACTIN, ALPHA SKELETAL MUSCLE	LOKIARCHAEUM SP. GC14_75	X-RAY	1.81	ATP
5yeea	ACTIN, ALPHA SKELETAL MUSCLE	LOKIARCHAEUM SP. GC14_75	X-RAY	1.81	LAB
4b1y	ACTIN, ALPHA SKELETAL MUSCLE	MUS MUSCULUS	X-RAY	1.29	LAB
4b1ya	ACTIN, ALPHA SKELETAL MUSCLE	MUS MUSCULUS	X-RAY	1.29	ATP
4b1yb	ACTIN, ALPHA SKELETAL MUSCLE	MUS MUSCULUS	X-RAY	1.29	1PE
4b1yc	ACTIN, ALPHA SKELETAL MUSCLE	MUS MUSCULUS	X-RAY	1.29	P6G
2fxu	ACTIN, ALPHA SKELETAL MUSCLE	ORYCTOLAGUS CUNICULUS	X-RAY	1.35	ATP
2fxua	ACTIN, ALPHA SKELETAL MUSCLE	ORYCTOLAGUS CUNICULUS	X-RAY	1.35	BID
1y64	ACTIN, ALPHA SKELETAL MUSCLE	SACCHAROMYCES CEREVISIAE	X-RAY	3.05	ATP
5noj	ACTIN, ALPHA SKELETAL MUSCLE	SUS SCROFA	ELECTRON	11	ADP
2q97	ACTIN, ALPHA SKELETAL MUSCLE	TOXOPLASMA GONDII	X-RAY	2.5	ATP
3m1f	ACTIN, ALPHA SKELETAL MUSCLE	VIBRIO PARAHAEMOLYTICUS	X-RAY	2.89	ATP
4cbw	ACTIN, ALPHA SKELETAL MUSCLE, ACTIN	MUS MUSCULUS	X-RAY	2.5	ATP
4a7l	ACTIN, ALPHA SKELETON MUSCLE	DICTYOSTELIUM DISCOIDEUM	ELECTRON	8.1	ADP
3ub5	ACTIN, CYTOPLASMIC 1	BOS TAURUS	X-RAY	2.2	ATP
5jlh	ACTIN, CYTOPLASMIC 2	HOMO SAPIENS	ELECTRON	3.9	ADP
3w3d	ACTIN, GAMMA-ENTERIC SMOOTH MUSCLE	BOS TAURUS	X-RAY	1.8	ATP
1kxp	ACTIN,ALPHA SKELETAL MUSCLE	HOMO SAPIENS	X-RAY	2.1	ATP
4pl7	ACTIN,THYMOSIN BETA-4	KOMAGATAELLA PASTORIS, HOMO SAPIENS	X-RAY	2.3	ATP
1aec	ACTINIDIN	ACTINIDIA CHINENSIS	X-RAY	1.86	E64
4end	ACTINOHIVIN	ACTINOMYCETE SP.	X-RAY	1.9	2M4
2rhc	ACTINORHODIN POLYKETIDE KETOREDUCTASE	STREPTOMYCES COELICOLOR	X-RAY	2.1	NAP
2rhca	ACTINORHODIN POLYKETIDE KETOREDUCTASE	STREPTOMYCES COELICOLOR	X-RAY	2.1	EMO
2kg6	ACTINORHODIN POLYKETIDE SYNTHASE ACYL CARRIER	STREPTOMYCES COELICOLOR	SOLUTION		SXA
3eqr	ACTIVATED CDC42 KINASE 1	HOMO SAPIENS	X-RAY	2	T74
2jkh	ACTIVATED FACTOR XA HEAVY CHAIN	HOMO SAPIENS	X-RAY	1.25	BI7
2q1j	ACTIVATED FACTOR XA HEAVY CHAIN (EC 3.4.21.6)	HOMO SAPIENS	X-RAY	1.9	FXI
1aut	ACTIVATED PROTEIN C	HOMO SAPIENS	X-RAY	2.8	0G6
1sxj	ACTIVATOR 1 95 KDA SUBUNIT	SACCHAROMYCES CEREVISIAE	X-RAY	2.85	AGS
1sxja	ACTIVATOR 1 95 KDA SUBUNIT	SACCHAROMYCES CEREVISIAE	X-RAY	2.85	ADP
1hux	ACTIVATOR OF (R)-2-HYDROXYGLUTARYL-COA	ACIDAMINOCOCCUS FERMENTANS	X-RAY	3	ADP
4ehu	ACTIVATOR OF 2-HYDROXYISOCAPROYL-COA DEHYDRATASE	CLOSTRIDIUM DIFFICILE	X-RAY	1.6	ANP
2hfo	ACTIVATOR OF PHOTOPIGMENT AND PUC EXPRESSION	SYNECHOCYSTIS SP.	X-RAY	2.1	FMN
3mzi	ACTIVATOR OF PHOTOPIGMENT AND PUC EXPRESSION	SYNECHOCYSTIS SP. PCC 6803	X-RAY	2.3	FMN
5dgk	ACTIVE HELICASE	STAPHYLOCOCCUS AUREUS	X-RAY	2.9	ANP
2qlu	ACTIVIN RECEPTOR TYPE IIB	HOMO SAPIENS	X-RAY	2	ADE
3q4u	ACTIVIN RECEPTOR TYPE-1	HOMO SAPIENS	X-RAY	1.82	LDN
3q4ua	ACTIVIN RECEPTOR TYPE-1	HOMO SAPIENS	X-RAY	1.82	FLC
3soc	ACTIVIN RECEPTOR TYPE-2A	HOMO SAPIENS	X-RAY	1.95	GVD
5ngv	ACTIVIN RECEPTOR TYPE-2B	HOMO SAPIENS	X-RAY	2	PG4
3b6a	ACTR PROTEIN	STREPTOMYCES COELICOLOR	X-RAY	3.05	ZCT
1lq9	ACTVA-ORF6 MONOOXYGENASE	STREPTOMYCES COELICOLOR	X-RAY	1.3	PG4
5zfj	ACYCLASE	MASTIGOCLADUS LAMINOSUS UTEX LB 1931	X-RAY	1.86	9BF
3ejb	ACYL CARRIER PROTEIN	BACILLUS SUBTILIS	X-RAY	2	ZMP
3ejba	ACYL CARRIER PROTEIN	BACILLUS SUBTILIS	X-RAY	2	HTG
3ejbb	ACYL CARRIER PROTEIN	BACILLUS SUBTILIS	X-RAY	2	HEM
1l0i	ACYL CARRIER PROTEIN	ESCHERICHIA COLI	X-RAY	1.2	PSR
1t5b	ACYL CARRIER PROTEIN PHOSPHODIESTERASE	SALMONELLA TYPHIMURIUM	X-RAY	1.4	FMN
1fth	ACYL CARRIER PROTEIN SYNTHASE	STREPTOCOCCUS PNEUMONIAE	X-RAY	1.9	A3P
2qg8	ACYL CARRIER PROTEIN SYNTHASE PY06285	PLASMODIUM YOELII YOELII	X-RAY	2	A3P
5egl	ACYL COA HYDROLASE	STAPHYLOCOCCUS AUREUS (STRAIN MU50 / ATCC	X-RAY	2.1	BCO
5egla	ACYL COA HYDROLASE	STAPHYLOCOCCUS AUREUS (STRAIN MU50 / ATCC	X-RAY	2.1	COA
5eglb	ACYL COA HYDROLASE	STAPHYLOCOCCUS AUREUS (STRAIN MU50 / ATCC	X-RAY	2.1	5NG
2e1t	ACYL TRANSFERASE	CHRYSANTHEMUM X MORIFOLIUM	X-RAY	2.1	MLC
4xvx	ACYL-[ACYL-CARRIER-PROTEIN] DEHYDROGENASE MBTN	MYCOBACTERIUM TUBERCULOSIS	X-RAY	2.3	FDA
4xvxa	ACYL-[ACYL-CARRIER-PROTEIN] DEHYDROGENASE MBTN	MYCOBACTERIUM TUBERCULOSIS	X-RAY	2.3	P33
4v0j	ACYL-[ACYL-CARRIER-PROTEIN] DESATURASE, CHLOROPLASTIC	RICINUS COMMUNIS	X-RAY	2.8	GOL
2jf2	ACYL-[ACYL-CARRIER-PROTEIN]--UDP-N-	ESCHERICHIA COLI	X-RAY	1.8	PEG
3i3x	ACYL-[ACYL-CARRIER-PROTEIN]--UDP-N-	LEPTOSPIRA INTERROGANS	X-RAY	2.1	U22
4e6t	ACYL-[ACYL-CARRIER-PROTEIN]--UDP-N-ACETYLGLUCOSAMINE O-	ACINETOBACTER BAUMANNII	X-RAY	1.8	FLC
1j2z	ACYL-[ACYL-CARRIER-PROTEIN]--UDP-N-ACETYLGLUCOSAMINE O-	HELICOBACTER PYLORI	X-RAY	2.1	SOG
1j2za	ACYL-[ACYL-CARRIER-PROTEIN]--UDP-N-ACETYLGLUCOSAMINE O-	HELICOBACTER PYLORI	X-RAY	2.1	TLA
5jxx	ACYL-[ACYL-CARRIER-PROTEIN]--UDP-N-ACETYLGLUCOSAMINE O-	MORAXELLA CATARRHALIS (STRAIN BBH18)	X-RAY	3	FLC
5dep	ACYL-[ACYL-CARRIER-PROTEIN]--UDP-N-ACETYLGLUCOSAMINE O-	PSEUDOMONAS AERUGINOSA (STRAIN PA7)	X-RAY	2.16	UD1
2ess	ACYL-ACP THIOESTERASE	BACTEROIDES THETAIOTAOMICRON	X-RAY	1.9	MPD
4dxe	ACYL-CARRIER-PROTEIN SYNTHASE	STAPHYLOCOCCUS AUREUS	X-RAY	2.51	MLI
3fp5	ACYL-COA BINDING PROTEIN	MONILIOPHTHORA PERNICIOSA	X-RAY	1.61	MES
5ahs	ACYL-COA DEHYDROGENASE	ADVENELLA MIMIGARDEFORDENSIS DPN7	X-RAY	2.3	FAD
5ahsa	ACYL-COA DEHYDROGENASE	ADVENELLA MIMIGARDEFORDENSIS DPN7	X-RAY	2.3	COA
3owa	ACYL-COA DEHYDROGENASE	BACILLUS ANTHRACIS	X-RAY	1.97	FAD
3owaa	ACYL-COA DEHYDROGENASE	BACILLUS ANTHRACIS	X-RAY	1.97	1PE
5ez3	ACYL-COA DEHYDROGENASE	BRUCELLA MELITENSIS BIOTYPE 1	X-RAY	2.15	FAD
5ez3a	ACYL-COA DEHYDROGENASE	BRUCELLA MELITENSIS BIOTYPE 1	X-RAY	2.15	MRD
4m9a	ACYL-COA DEHYDROGENASE	BURKHOLDERIA THAILANDENSIS	X-RAY	2.2	FDA
2pg0	ACYL-COA DEHYDROGENASE	GEOBACILLUS KAUSTOPHILUS	X-RAY	1.8	FAD
3oib	ACYL-COA DEHYDROGENASE	MYCOBACTERIUM SMEGMATIS	X-RAY	2.1	FDA
3pfd	ACYL-COA DEHYDROGENASE	MYCOBACTERIUM THERMORESISTIBILE	X-RAY	2.1	FDA
4x28	ACYL-COA DEHYDROGENASE	MYCOBACTERIUM TUBERCULOSIS (STRAIN ATCC 25618 /	X-RAY	1.99	FDA
6es9	ACYL-COA DEHYDROGENASE	PARACOCCUS DENITRIFICANS (STRAIN PD 1222)	X-RAY	1.37	COA
6es9a	ACYL-COA DEHYDROGENASE	PARACOCCUS DENITRIFICANS (STRAIN PD 1222)	X-RAY	1.37	FAD
2d29	ACYL-COA DEHYDROGENASE	THERMUS THERMOPHILUS	X-RAY	1.65	FAD
4l1f	ACYL-COA DEHYDROGENASE DOMAIN PROTEIN	ACIDAMINOCOCCUS FERMENTANS	X-RAY	1.79	FAD
4l1fa	ACYL-COA DEHYDROGENASE DOMAIN PROTEIN	ACIDAMINOCOCCUS FERMENTANS	X-RAY	1.79	COS
4iv6	ACYL-COA DEHYDROGENASE FADE3	MYCOBACTERIUM SMEGMATIS	X-RAY	2	FDA
2wbi	ACYL-COA DEHYDROGENASE FAMILY MEMBER 11	HOMO SAPIENS	X-RAY	2.8	FAD
1rx0	ACYL-COA DEHYDROGENASE FAMILY MEMBER 8, MITOCHONDRIAL	HOMO SAPIENS	X-RAY	1.77	FAD
1rx0a	ACYL-COA DEHYDROGENASE FAMILY MEMBER 8, MITOCHONDRIAL	HOMO SAPIENS	X-RAY	1.77	2MC
1udy	ACYL-COA DEHYDROGENASE, MEDIUM-CHAIN SPECIFIC	SUS SCROFA	X-RAY	2.4	FAD
1udya	ACYL-COA DEHYDROGENASE, MEDIUM-CHAIN SPECIFIC	SUS SCROFA	X-RAY	2.4	CS8
2a1t	ACYL-COA DEHYDROGENASE, MEDIUM-CHAIN SPECIFIC,	HOMO SAPIENS	X-RAY	2.8	FAD
2a1ta	ACYL-COA DEHYDROGENASE, MEDIUM-CHAIN SPECIFIC,	HOMO SAPIENS	X-RAY	2.8	AMP
4zyo	ACYL-COA DESATURASE	HOMO SAPIENS	X-RAY	3.25	ST9
4zyoa	ACYL-COA DESATURASE	HOMO SAPIENS	X-RAY	3.25	LMT
4ymk	ACYL-COA DESATURASE 1	MUS MUSCULUS	X-RAY	2.61	ST9
4ymka	ACYL-COA DESATURASE 1	MUS MUSCULUS	X-RAY	2.61	MPG
1y7u	ACYL-COA HYDROLASE	BACILLUS CEREUS	X-RAY	2.8	COA
1vpm	ACYL-COA HYDROLASE	BACILLUS HALODURANS	X-RAY	1.66	COA
5szv	ACYL-COA HYDROLASE	NEISSERIA MENINGITIDIS	X-RAY	2	COA
1w07	ACYL-COA OXIDASE	ARABIDOPSIS THALIANA	X-RAY	2	FAD
2ddh	ACYL-COA OXIDASE	RATTUS NORVEGICUS	X-RAY	2.07	FAD
2ddha	ACYL-COA OXIDASE	RATTUS NORVEGICUS	X-RAY	2.07	HXD
5icr	ACYL-COA SYNTHASE	MYCOBACTERIUM SMEGMATIS (STRAIN ATCC 700084 /	X-RAY	2.25	649
5d6j	ACYL-COA SYNTHASE	SACCHAROMYCES CEREVISIAE (STRAIN ATCC 204508 /	X-RAY	2.25	ATP
4nxy	ACYL-COA SYNTHETASE	STREPTOMYCES LIVIDANS	X-RAY	1.45	ETF
4nxya	ACYL-COA SYNTHETASE	STREPTOMYCES LIVIDANS	X-RAY	1.45	GOL
4xz3	ACYL-COA SYNTHETASE (NDP FORMING)	CANDIDATUS KORARCHAEUM CRYPTOFILUM OPF8	X-RAY	2.4	COA
4xz3a	ACYL-COA SYNTHETASE (NDP FORMING)	CANDIDATUS KORARCHAEUM CRYPTOFILUM OPF8	X-RAY	2.4	ACP
5upt	ACYL-COA SYNTHETASE PTMA2	STREPTOMYCES PLATENSIS SUBSP. ROSACEUS	X-RAY	1.92	8JG
3bjk	ACYL-COA THIOESTER HYDROLASE HI0827	HAEMOPHILUS INFLUENZAE RD KW20	X-RAY	1.9	CIT
5t07	ACYL-COA THIOESTER HYDROLASE YBGC	ESCHERICHIA COLI O157:H7	X-RAY	1.72	MFK
5tif	ACYL-COA THIOESTERASE I	ESCHERICHIA COLI	X-RAY	0.97	OCA
5tifa	ACYL-COA THIOESTERASE I	ESCHERICHIA COLI	X-RAY	0.97	PEG
1c8u	ACYL-COA THIOESTERASE II	ESCHERICHIA COLI	X-RAY	1.9	LDA
4r4u	ACYL-COA THIOESTERASE II	YERSINIA PESTIS	X-RAY	2.2	COA
2wh5	ACYL-COA-BINDING DOMAIN-CONTAINING PROTEIN 4	HOMO SAPIENS	X-RAY	2.6	STE
2wh5a	ACYL-COA-BINDING DOMAIN-CONTAINING PROTEIN 4	HOMO SAPIENS	X-RAY	2.6	ST9
2wh5b	ACYL-COA-BINDING DOMAIN-CONTAINING PROTEIN 4	HOMO SAPIENS	X-RAY	2.6	COA
3flv	ACYL-COA-BINDING DOMAIN-CONTAINING PROTEIN 5	HOMO SAPIENS	X-RAY	1.7	COA
3epy	ACYL-COA-BINDING DOMAIN-CONTAINING PROTEIN 7	HOMO SAPIENS	X-RAY	2.01	COA
3epya	ACYL-COA-BINDING DOMAIN-CONTAINING PROTEIN 7	HOMO SAPIENS	X-RAY	2.01	PLM
1nvl	ACYL-COA-BINDING PROTEIN	BOS TAURUS	SOLUTION		COA, PLM
2x1d	ACYL-COENZYME	PENICILLIUM CHRYSOGENUM	X-RAY	1.64	GOL
1aca	ACYL-COENZYME A BINDING PROTEIN	BOS TAURUS	SOLUTION		COA, PLM
5k3j	ACYL-COENZYME A OXIDASE	CAENORHABDITIS ELEGANS	X-RAY	2.68	FAD
5k3ja	ACYL-COENZYME A OXIDASE	CAENORHABDITIS ELEGANS	X-RAY	2.68	ATP
5k3jb	ACYL-COENZYME A OXIDASE	CAENORHABDITIS ELEGANS	X-RAY	2.68	6QA
2ix5	ACYL-COENZYME A OXIDASE 4, PEROXISOMAL	ARABIDOPSIS THALIANA	X-RAY	2.7	CAA
2ix5a	ACYL-COENZYME A OXIDASE 4, PEROXISOMAL	ARABIDOPSIS THALIANA	X-RAY	2.7	FAD
3c5e	ACYL-COENZYME A SYNTHETASE ACSM2A, MITOCHONDRIAL PRECURSOR	HOMO SAPIENS	X-RAY	1.6	ATP
3c5ea	ACYL-COENZYME A SYNTHETASE ACSM2A, MITOCHONDRIAL PRECURSOR	HOMO SAPIENS	X-RAY	1.6	GOL
4mob	ACYL-COENZYME A THIOESTERASE 12	HOMO SAPIENS	X-RAY	2.4	COA
4moba	ACYL-COENZYME A THIOESTERASE 12	HOMO SAPIENS	X-RAY	2.4	ADP
2wyc	ACYL-HOMOSERINE LACTONE ACYLASE PVDQ SUBUNIT	PSEUDOMONAS AERUGINOSA	X-RAY	1.9	3LA
3l91	ACYL-HOMOSERINE LACTONE ACYLASE PVDQ SUBUNIT ALPHA	PSEUDOMONAS AERUGINOSA	X-RAY	1.66	OCA
4m1j	ACYL-HOMOSERINE LACTONE ACYLASE PVDQ SUBUNIT BETA	PSEUDOMONAS AERUGINOSA	X-RAY	1.8	B0S
1k4j	ACYL-HOMOSERINELACTONE SYNTHASE ESAI	PANTOEA STEWARTII SUBSP. STEWARTII	X-RAY	2.5	REO
5sym	ACYL-PROTEIN THIOESTERASE 1	HOMO SAPIENS	X-RAY	1.55	71Q
5syn	ACYL-PROTEIN THIOESTERASE 2	HOMO SAPIENS	X-RAY	1.64	71T
4re5	ACYLAMINO-ACID-RELEASING ENZYME	AEROPYRUM PERNIX	X-RAY	1.9	Y3A
4re5a	ACYLAMINO-ACID-RELEASING ENZYME	AEROPYRUM PERNIX	X-RAY	1.9	MPD
3fnb	ACYLAMINOACYL PEPTIDASE SMU_737	STREPTOCOCCUS MUTANS	X-RAY	2.12	PGE
4zo3	ACYLHOMOSERINE LACTONASE	CHRYSEOBACTERIUM SP. STRB126	X-RAY	1.67	C6L
3e8m	ACYLNEURAMINATE CYTIDYLYLTRANSFERASE	BACTEROIDES THETAIOTAOMICRON	X-RAY	1.1	PG4
5w7c	ACYLOXYACYL HYDROLASE	HOMO SAPIENS	X-RAY	2.23	FTT
5w7ca	ACYLOXYACYL HYDROLASE	HOMO SAPIENS	X-RAY	2.23	DAO
5w7d	ACYLOXYACYL HYDROLASE	MUS MUSCULUS	X-RAY	1.75	PX8
5w7b	ACYLOXYACYL HYDROLASE SMALL SUBUNIT	ORYCTOLAGUS CUNICULUS	X-RAY	1.9	FTT
5w7ba	ACYLOXYACYL HYDROLASE SMALL SUBUNIT	ORYCTOLAGUS CUNICULUS	X-RAY	1.9	1PE
6fog	ACYLPYRUVASE FAHD1, MITOCHONDRIAL	HOMO SAPIENS	X-RAY	1.94	OXL
4yhi	ADABI-FAB2A HEAVY CHAIN	HOMO SAPIENS	X-RAY	1.9	4CC
4yhm	ADABI-FAB2B HEAVY CHAIN	HOMO SAPIENS	X-RAY	2.16	4CC
4yho	ADABI-FAB3 HEAVY CHAIN	HOMO SAPIENS	X-RAY	1.82	4CC
5svv	ADAGIO PROTEIN 1	ARABIDOPSIS THALIANA	X-RAY	2.1	FMN
2ddf	ADAM 17	HOMO SAPIENS	X-RAY	1.7	INN
1r55	ADAM 33	HOMO SAPIENS	X-RAY	1.58	97
4aig	ADAMALYSIN II	CROTALUS ADAMANTEUS	X-RAY	2	FLX
2jih	ADAMTS-1	HOMO SAPIENS	X-RAY	2.1	97
2rjp	ADAMTS-4	HOMO SAPIENS	X-RAY	2.8	886
2rjq	ADAMTS-5	HOMO SAPIENS	X-RAY	2.6	BAT
5ih2	ADAPTER MOLECULE CRK	ENDOTHIA GYROSA	X-RAY	1.8	PEG
5l23	ADAPTER MOLECULE CRK	MUS MUSCULUS	X-RAY	1.77	PEG
1w80	ADAPTER-RELATED PROTEIN COMPLEX 2 ALPHA 2	HOMO SAPIENS	X-RAY	1.9	DTD
2vgl	ADAPTOR PROTEIN COMPLEX AP-2, ALPHA 2 SUBUNIT	MUS MUSCULUS	X-RAY	2.59	IHP
4u0x	ADC-7 BETA-LACTAMASE	ACINETOBACTER BAUMANNII	X-RAY	2.03	ZXM
5ceg	ADDICTION MODULE ANTIDOTE PROTEIN, COPG/ARC/METJ FAMILY	MESORHIZOBIUM OPPORTUNISTUM (STRAIN LMG 24607 /	X-RAY	1.59	GOL
2ics	ADENINE DEAMINASE	ENTEROCOCCUS FAECALIS	X-RAY	2.3	ADE
1mud	ADENINE DNA GLYCOSYLASE	ESCHERICHIA COLI	X-RAY	1.8	ADE
5yw5	ADENINE PHOSPHORIBOSYLTRANSFERASE	FRANCISELLA TULARENSIS	X-RAY	1.9	ADE
1l1r	ADENINE PHOSPHORIBOSYLTRANSFERASE	GIARDIA INTESTINALIS	X-RAY	1.95	9DA
1l1ra	ADENINE PHOSPHORIBOSYLTRANSFERASE	GIARDIA INTESTINALIS	X-RAY	1.95	PRP
6fch	ADENINE PHOSPHORIBOSYLTRANSFERASE	HOMO SAPIENS	X-RAY	1.45	PRP
1qb7	ADENINE PHOSPHORIBOSYLTRANSFERASE	LEISHMANIA DONOVANI	X-RAY	1.5	ADE
1qb7a	ADENINE PHOSPHORIBOSYLTRANSFERASE	LEISHMANIA DONOVANI	X-RAY	1.5	CIT
1mzv	ADENINE PHOSPHORIBOSYLTRANSFERASE	LEISHMANIA TARENTOLAE	X-RAY	2.2	AMP
4m0k	ADENINE PHOSPHORIBOSYLTRANSFERASE	RHODOTHERMUS MARINUS	X-RAY	1.4	AMP
5znq	ADENINE PHOSPHORIBOSYLTRANSFERASE	YERSINIA PSEUDOTUBERCULOSIS IP 32953	X-RAY	1.75	ADE
5vjn	ADENINE PHOSPHORIBOSYLTRANSFERASE 1	SACCHAROMYCES CEREVISIAE	X-RAY	1.78	IR8
5vjna	ADENINE PHOSPHORIBOSYLTRANSFERASE 1	SACCHAROMYCES CEREVISIAE	X-RAY	1.78	ADE
5vn4	ADENINE PHOSPHORIBOSYLTRANSFERASE, PUTATIVE	TRYPANOSOMA BRUCEI BRUCEI (STRAIN 927/4	X-RAY	1.35	ADE
5vn4a	ADENINE PHOSPHORIBOSYLTRANSFERASE, PUTATIVE	TRYPANOSOMA BRUCEI BRUCEI (STRAIN 927/4	X-RAY	1.35	HSX
5vn4a	ADENINE PHOSPHORIBOSYLTRANSFERASE, PUTATIVE	TRYPANOSOMA BRUCEI BRUCEI (STRAIN 927/4	X-RAY	1.35	PPV
5hfj	ADENINE SPECIFIC DNA METHYLTRANSFERASE (DPNA)	HELICOBACTER PYLORI (STRAIN ATCC 700392 /	X-RAY	3.1	SAM
2adm	ADENINE-N6-DNA-METHYLTRANSFERASE TAQI	THERMUS AQUATICUS	X-RAY	2.6	SAM
1g60	ADENINE-SPECIFIC METHYLTRANSFERASE MBOIIA	MORAXELLA BOVIS	X-RAY	1.74	SAM
5iza	ADENOMATOUS POLYPOSIS COLI PROTEIN	HOMO SAPIENS	X-RAY	1.5	B
3uzc	ADENOSINE A2A RECEPTOR	HOMO SAPIENS	X-RAY	3.34	T4E
1ndy	ADENOSINE DEAMINASE	BOS TAURUS	X-RAY	2	FR3
3iar	ADENOSINE DEAMINASE	HOMO SAPIENS	X-RAY	1.52	3D1
1a4m	ADENOSINE DEAMINASE	MUS MUSCULUS	X-RAY	1.95	PRH
2pgf	ADENOSINE DEAMINASE	PLASMODIUM VIVAX	X-RAY	1.89	ADN
2qvn	ADENOSINE DEAMINASE	PLASMODIUM VIVAX SAI-1	X-RAY	2.19	GMP
2qvna	ADENOSINE DEAMINASE	PLASMODIUM VIVAX SAI-1	X-RAY	2.19	NHE
3pao	ADENOSINE DEAMINASE	PSEUDOMONAS AERUGINOSA	X-RAY	2.49	ADE
6n9m	ADENOSINE DEAMINASE	SALMONELLA TYPHIMURIUM (STRAIN LT2 / SGSC1412 /	X-RAY	1.45	DCF
6n91	ADENOSINE DEAMINASE	VIBRIO CHOLERAE O1 BIOVAR EL TOR STR. N16961	X-RAY	2.05	DCF
6n91a	ADENOSINE DEAMINASE	VIBRIO CHOLERAE O1 BIOVAR EL TOR STR. N16961	X-RAY	2.05	CXS
3rys	ADENOSINE DEAMINASE 1	ARTHROBACTER AURESCENS	X-RAY	2.6	ADE
3lgg	ADENOSINE DEAMINASE CECR1	HOMO SAPIENS	X-RAY	2.5	CFE
2i6a	ADENOSINE KINASE	HOMO SAPIENS	X-RAY	2.2	5I5
5kb6	ADENOSINE KINASE	MUS MUSCULUS	X-RAY	1.2	ADN
4ube	ADENOSINE KINASE	MYCOBACTERIUM BOVIS	X-RAY	1.93	2FA
4dc3	ADENOSINE KINASE	SCHISTOSOMA MANSONI	X-RAY	2.4	ADN
4dc3a	ADENOSINE KINASE	SCHISTOSOMA MANSONI	X-RAY	2.4	2FA
4o1g	ADENOSINE KINASE	MYCOBACTERIUM TUBERCULOSIS	X-RAY	1.5	AGS
3ubo	ADENOSINE KINASE	SINORHIZOBIUM MELILOTI	X-RAY	2.6	ADN
3uboa	ADENOSINE KINASE	SINORHIZOBIUM MELILOTI	X-RAY	2.6	ADP
2abs	ADENOSINE KINASE	TOXOPLASMA GONDII	X-RAY	1.1	ACP
4n09	ADENOSINE KINASE	TRYPANOSOMA BRUCEI BRUCEI	X-RAY	2.6	ADN
4n09a	ADENOSINE KINASE	TRYPANOSOMA BRUCEI BRUCEI	X-RAY	2.6	ADP
2xtb	ADENOSINE KINASE	TRYPANOSOMA BRUCEI RHODESIENSE	X-RAY	2.8	KRM
3uq6	ADENOSINE KINASE, PUTATIVE	SCHISTOSOMA MANSONI	X-RAY	2.3	ADN
3uq6a	ADENOSINE KINASE, PUTATIVE	SCHISTOSOMA MANSONI	X-RAY	2.3	AMP
3otx	ADENOSINE KINASE, PUTATIVE	TRYPANOSOMA BRUCEI	X-RAY	1.55	AP5
4itr	ADENOSINE MONOPHOSPHATE-PROTEIN TRANSFERASE AND CYSTEINE	HOMO SAPIENS	X-RAY	2.3	AMP
4itra	ADENOSINE MONOPHOSPHATE-PROTEIN TRANSFERASE AND CYSTEINE	HOMO SAPIENS	X-RAY	2.3	GDP
4u04	ADENOSINE MONOPHOSPHATE-PROTEIN TRANSFERASE FICD	HOMO SAPIENS	X-RAY	2.48	TAR
3zlm	ADENOSINE MONOPHOSPHATE-PROTEIN TRANSFERASE NMFIC	NEISSERIA MENINGITIDIS	X-RAY	2	ANP
3zcn	ADENOSINE MONOPHOSPHATE-PROTEIN TRANSFERASE SOFIC	SHEWANELLA ONEIDENSIS	X-RAY	1.7	ATP
3zcb	ADENOSINE MONOPHOSPHATE-PROTEIN TRANSFERASE VBHT	BARTONELLA SCHOENBUCHENSIS	X-RAY	1.94	ATP
2goy	ADENOSINE PHOSPHOSULFATE REDUCTASE	PSEUDOMONAS AERUGINOSA	X-RAY	2.7	ADX
5uen	ADENOSINE RECEPTOR A1,SOLUBLE CYTOCHROME B562,ADENOSINE	HOMO SAPIENS, ESCHERICHIA COLI	X-RAY	3.2	DU1
2ydv	ADENOSINE RECEPTOR A2A	HOMO SAPIENS	X-RAY	2.6	NEC
3vg9	ADENOSINE RECEPTOR A2A	MUS MUSCULUS	X-RAY	2.7	ZMA
3qak	ADENOSINE RECEPTOR A2A,LYSOZYME CHIMERA	HOMO SAPIEN, ENTEROBACTERIA PHAGE T4	X-RAY	2.71	UKA
5nm4	ADENOSINE RECEPTOR A2A,SOLUBLE CYTOCHROME B562,ADENOSINE	HOMO SAPIENS, ESCHERICHIA COLI	X-RAY	1.7	ZMA
4eiy	ADENOSINE RECEPTOR A2A/SOLUBLE CYTOCHROME B562 CHIMERA	HOMO SAPIENS, ESCHERICHIA COLI	X-RAY	1.8	ZMA
1d6j	ADENOSINE-5'PHOSPHOSULFATE KINASE	PENICILLIUM CHRYSOGENUM	X-RAY	2	TLA
6ijn	ADENOSINE/AMP DEAMINASE FAMILY PROTEIN	ARABIDOPSIS THALIANA	X-RAY	1.66	6MZ
6e4b	ADENOSYLCOBALAMIN/ALPHA-RIBAZOLE PHOSPHATASE	ESCHERICHIA COLI (STRAIN K12)	X-RAY	2.55	GOL
1c9k	ADENOSYLCOBINAMIDE KINASE	SALMONELLA TYPHIMURIUM	X-RAY	2.2	5GP
3rsb	ADENOSYLCOBINAMIDE-PHOSPHATE GUANYLYLTRANSFERASE	METHANOCALDOCOCCUS JANNASCHII	X-RAY	2.8	GTP
5m67	ADENOSYLHOMOCYSTEINASE	BRADYRHIZOBIUM ELKANII	X-RAY	1.54	NAD
5m67a	ADENOSYLHOMOCYSTEINASE	BRADYRHIZOBIUM ELKANII	X-RAY	1.54	ADE
5m67b	ADENOSYLHOMOCYSTEINASE	BRADYRHIZOBIUM ELKANII	X-RAY	1.54	3D1
3n58	ADENOSYLHOMOCYSTEINASE	BRUCELLA MELITENSIS BIOVAR ABORTUS	X-RAY	2.39	ADN
3n58a	ADENOSYLHOMOCYSTEINASE	BRUCELLA MELITENSIS BIOVAR ABORTUS	X-RAY	2.39	NAD
3glq	ADENOSYLHOMOCYSTEINASE	BURKHOLDERIA PSEUDOMALLEI 1710B	X-RAY	2.3	NAD
3glqa	ADENOSYLHOMOCYSTEINASE	BURKHOLDERIA PSEUDOMALLEI 1710B	X-RAY	2.3	RAB
5t8k	ADENOSYLHOMOCYSTEINASE	CRYPTOSPORIDIUM PARVUM (STRAIN IOWA II)	X-RAY	1.95	NAD
5t8ka	ADENOSYLHOMOCYSTEINASE	CRYPTOSPORIDIUM PARVUM (STRAIN IOWA II)	X-RAY	1.95	ADE
6gbn	ADENOSYLHOMOCYSTEINASE	CYTOPHAGA HUTCHINSONII (STRAIN ATCC 33406 /	X-RAY	2.09	ADN
6gbna	ADENOSYLHOMOCYSTEINASE	CYTOPHAGA HUTCHINSONII (STRAIN ATCC 33406 /	X-RAY	2.09	NAD
6aph	ADENOSYLHOMOCYSTEINASE	ELIZABETHKINGIA ANOPHELIS NUHP1	X-RAY	1.65	NAD
6apha	ADENOSYLHOMOCYSTEINASE	ELIZABETHKINGIA ANOPHELIS NUHP1	X-RAY	1.65	ADN
3ond	ADENOSYLHOMOCYSTEINASE	LUPINUS LUTEUS	X-RAY	1.17	NAD
3onda	ADENOSYLHOMOCYSTEINASE	LUPINUS LUTEUS	X-RAY	1.17	ADN
5axc	ADENOSYLHOMOCYSTEINASE	MUS MUSCULUS	X-RAY	1.55	NAD
5axca	ADENOSYLHOMOCYSTEINASE	MUS MUSCULUS	X-RAY	1.55	ARJ
3ce6	ADENOSYLHOMOCYSTEINASE	MYCOBACTERIUM TUBERCULOSIS	X-RAY	1.6	ADN
3ce6a	ADENOSYLHOMOCYSTEINASE	MYCOBACTERIUM TUBERCULOSIS	X-RAY	1.6	NAD
1v8b	ADENOSYLHOMOCYSTEINASE	PLASMODIUM FALCIPARUM	X-RAY	2.4	NAD
1v8ba	ADENOSYLHOMOCYSTEINASE	PLASMODIUM FALCIPARUM	X-RAY	2.4	ADN
6f3p	ADENOSYLHOMOCYSTEINASE	PSEUDOMONAS AERUGINOSA (STRAIN ATCC 15692 / DSM	X-RAY	1.35	NAD
6f3pa	ADENOSYLHOMOCYSTEINASE	PSEUDOMONAS AERUGINOSA (STRAIN ATCC 15692 / DSM	X-RAY	1.35	3AD
1xwf	ADENOSYLHOMOCYSTEINASE	RATTUS NORVEGICUS	X-RAY	2.8	NAD
1xwfa	ADENOSYLHOMOCYSTEINASE	RATTUS NORVEGICUS	X-RAY	2.8	ADN
5tow	ADENOSYLHOMOCYSTEINASE	THERMOTOGA MARITIMA (STRAIN ATCC 43589 / MSB8 /	X-RAY	1.75	MPD
5towa	ADENOSYLHOMOCYSTEINASE	THERMOTOGA MARITIMA (STRAIN ATCC 43589 / MSB8 /	X-RAY	1.75	NAI
3x2f	ADENOSYLHOMOCYSTEINASE	THERMOTOGA MARITIMA MSB8	X-RAY	2.04	NAI
3h9u	ADENOSYLHOMOCYSTEINASE	TRYPANOSOMA BRUCEI	X-RAY	1.9	NAD
3h9ua	ADENOSYLHOMOCYSTEINASE	TRYPANOSOMA BRUCEI	X-RAY	1.9	ADN
3gvp	ADENOSYLHOMOCYSTEINASE 3	HOMO SAPIENS	X-RAY	2.25	NAD
4jos	ADENOSYLHOMOCYSTEINE NUCLEOSIDASE	FRANCISELLA PHILOMIRAGIA SUBSP. PHILOMIRAGIA	X-RAY	1.45	ADE
4a0g	ADENOSYLMETHIONINE-8-AMINO-7-OXONONANOATE	ARABIDOPSIS THALIANA	X-RAY	2.5	PLP
3dod	ADENOSYLMETHIONINE-8-AMINO-7-OXONONANOATE AMINOTRANSFERASE	BACILLUS SUBTILIS	X-RAY	1.9	PLP
1dty	ADENOSYLMETHIONINE-8-AMINO-7-OXONONANOATE AMINOTRANSFERASE	ESCHERICHIA COLI	X-RAY	2.14	PLP
5te2	ADENOSYLMETHIONINE-8-AMINO-7-OXONONANOATE AMINOTRANSFERASE	MYCOBACTERIUM BOVIS (STRAIN ATCC BAA-935 /	X-RAY	1.8	7B9
4wyg	ADENOSYLMETHIONINE-8-AMINO-7-OXONONANOATE AMINOTRANSFERASE	MYCOBACTERIUM TUBERCULOSIS	X-RAY	1.62	PLP
4wyga	ADENOSYLMETHIONINE-8-AMINO-7-OXONONANOATE AMINOTRANSFERASE	MYCOBACTERIUM TUBERCULOSIS	X-RAY	1.62	EPE
4wygb	ADENOSYLMETHIONINE-8-AMINO-7-OXONONANOATE AMINOTRANSFERASE	MYCOBACTERIUM TUBERCULOSIS	X-RAY	1.62	3W1
4wyd	ADENOSYLMETHIONINE-8-AMINO-7-OXONONANOATE AMINOTRANSFERASE	MYCOBACTERIUM TUBERCULOSIS (STRAIN ATCC 25618 /	X-RAY	1.35	PLP
4wyda	ADENOSYLMETHIONINE-8-AMINO-7-OXONONANOATE AMINOTRANSFERASE	MYCOBACTERIUM TUBERCULOSIS (STRAIN ATCC 25618 /	X-RAY	1.35	3VR
4wydb	ADENOSYLMETHIONINE-8-AMINO-7-OXONONANOATE AMINOTRANSFERASE	MYCOBACTERIUM TUBERCULOSIS (STRAIN ATCC 25618 /	X-RAY	1.35	EPE
1ykd	ADENYLATE CYCLASE	ANABAENA SP.	X-RAY	1.9	CMP
5o5l	ADENYLATE CYCLASE	MYCOBACTERIUM INTRACELLULARE 1956	X-RAY	2.7	ONM
1wc3	ADENYLATE CYCLASE	SPIRULINA PLATENSIS	X-RAY	1.9	APC
3n10	ADENYLATE CYCLASE 2	YERSINIA PESTIS	X-RAY	1.6	CMP
4oz3	ADENYLATE CYCLASE TYPE 10	HOMO SAPIENS	X-RAY	1.7	1Z8
3c14	ADENYLATE CYCLASE TYPE 5	BOS TAURUS	X-RAY	2.68	FOK
3c14a	ADENYLATE CYCLASE TYPE 5	BOS TAURUS	X-RAY	2.68	GSP
4qo6	ADENYLATE CYCLASE-LIKE PROTEIN	CHLAMYDIA TRACHOMATIS	X-RAY	2.26	PEG
1cjt	ADENYLATE CYCLASE, TYPE V	BOS TAURUS	X-RAY	2.8	GSP
1cjta	ADENYLATE CYCLASE, TYPE V	BOS TAURUS	X-RAY	2.8	FOK
1cjtb	ADENYLATE CYCLASE, TYPE V	BOS TAURUS	X-RAY	2.8	DAD
3a8t	ADENYLATE ISOPENTENYLTRANSFERASE	HUMULUS LUPULUS	X-RAY	2.37	ATP
4ike	ADENYLATE KINASE	AQUIFEX AEOLICUS	X-RAY	1.48	AMP
4ikea	ADENYLATE KINASE	AQUIFEX AEOLICUS	X-RAY	1.48	ADP
4qbg	ADENYLATE KINASE	BACILLUS SUBTILIS	X-RAY	1.37	AP5
3be4	ADENYLATE KINASE	CRYPTOSPORIDIUM PARVUM IOWA II	X-RAY	1.6	AP5
2xb4	ADENYLATE KINASE	DESULFOVIBRIO GIGAS	X-RAY	1.8	SRT
1e4v	ADENYLATE KINASE	ESCHERICHIA COLI	X-RAY	1.85	AP5
6f7u	ADENYLATE KINASE	ESCHERICHIA COLI K-12	X-RAY	1.4	GCP
1zin	ADENYLATE KINASE	GEOBACILLUS STEAROTHERMOPHILUS	X-RAY	1.6	AP5
3fb4	ADENYLATE KINASE	MARINIBACILLUS MARINUS	X-RAY	2	AP5
3h86	ADENYLATE KINASE	METHANOCOCCUS MARIPALUDIS	X-RAY	2.5	AP5
1kht	ADENYLATE KINASE	METHANOCOCCUS VOLTAE	X-RAY	2.5	AMP
2cdn	ADENYLATE KINASE	MYCOBACTERIUM TUBERCULOSIS	X-RAY	1.9	ADP
5x6l	ADENYLATE KINASE	NOTOTHENIA CORIICEPS	X-RAY	1.86	AP5
4k46	ADENYLATE KINASE	PHOTOBACTERIUM PROFUNDUM	X-RAY	2.01	ADP
4k46a	ADENYLATE KINASE	PHOTOBACTERIUM PROFUNDUM	X-RAY	2.01	AMP
1aky	ADENYLATE KINASE	SACCHAROMYCES CEREVISIAE	X-RAY	1.63	AP5
5x6j	ADENYLATE KINASE	SPOROSARCINA GLOBISPORA	X-RAY	2.1	AP5
4nu0	ADENYLATE KINASE	STREPTOCOCCUS PNEUMONIAE	X-RAY	1.49	AP5
1nks	ADENYLATE KINASE	SULFOLOBUS ACIDOCALDARIUS	X-RAY	2.57	AMP
1nksa	ADENYLATE KINASE	SULFOLOBUS ACIDOCALDARIUS	X-RAY	2.57	ADP
3adk	ADENYLATE KINASE	SUS SCROFA	X-RAY	2.1	SO4
1zak	ADENYLATE KINASE	ZEA MAYS	X-RAY	3.5	AP5
2c95	ADENYLATE KINASE 1	HOMO SAPIENS	X-RAY	1.71	B4P
2c95a	ADENYLATE KINASE 1	HOMO SAPIENS	X-RAY	1.71	MLI
3tlx	ADENYLATE KINASE 2	PLASMODIUM FALCIPARUM	X-RAY	2.75	AMP
3tlxa	ADENYLATE KINASE 2	PLASMODIUM FALCIPARUM	X-RAY	2.75	ADP
3tlxb	ADENYLATE KINASE 2	PLASMODIUM FALCIPARUM	X-RAY	2.75	ATP
2bbw	ADENYLATE KINASE 4, AK4	HOMO SAPIENS	X-RAY	2.05	GP5
2bwj	ADENYLATE KINASE 5	HOMO SAPIENS	X-RAY	2.3	AMP
5xz2	ADENYLATE KINASE ISOENZYME 1	DANIO RERIO	X-RAY	1.75	AP5
5ycf	ADENYLATE KINASE ISOENZYME 1	XIPHOPHORUS MACULATUS	X-RAY	1.94	AP5
2c9y	ADENYLATE KINASE ISOENZYME 2, MITOCHONDRIAL	HOMO SAPIENS	X-RAY	2.1	B4P
2ak3	ADENYLATE KINASE ISOENZYME-3	BOS TAURUS	X-RAY	1.85	AMP
3lw7	ADENYLATE KINASE RELATED PROTEIN (ADKA-LIKE)	SULFOLOBUS SOLFATARICUS	X-RAY	2.3	AMP
5g41	ADENYLATE KINSE	SYNTHETIC CONSTRUCT	X-RAY	1.54	AP5
5n9x	ADENYLATION DOMAIN	STREPTOMYCES SP.	X-RAY	2.4	ATP
5n9xa	ADENYLATION DOMAIN	STREPTOMYCES SP.	X-RAY	2.4	8QN
5ycd	ADENYLAYTE KINASE	POECILIA RETICULATA	X-RAY	1.8	AP5
2pfm	ADENYLOSUCCINATE LYASE	BACILLUS ANTHRACIS	X-RAY	2	MLI
2ptr	ADENYLOSUCCINATE LYASE	ESCHERICHIA COLI	X-RAY	1.85	2SA
4eei	ADENYLOSUCCINATE LYASE	FRANCISELLA TULARENSIS SUBSP. TULARENSIS SCHU	X-RAY	1.92	AMP
2j91	ADENYLOSUCCINATE LYASE	HOMO SAPIENS	X-RAY	1.8	AMP
5nx9	ADENYLOSUCCINATE LYASE	HOMO SAPIENS NEANDERTHALENSIS	X-RAY	2.3	AMP
5nx9a	ADENYLOSUCCINATE LYASE	HOMO SAPIENS NEANDERTHALENSIS	X-RAY	2.3	2SA
4mx2	ADENYLOSUCCINATE LYASE	LEISHMANIA DONOVANI	X-RAY	1.9	AMP
2qga	ADENYLOSUCCINATE LYASE	PLASMODIUM VIVAX	X-RAY	2.01	AMP
4nsl	ADENYLOSUCCINATE LYASE	SALMONELLA ENTERICA SUBSP. ENTERICA SEROVAR	X-RAY	3	N2P
5eyt	ADENYLOSUCCINATE LYASE	SCHISTOSOMA MANSONI	X-RAY	2.36	AMP
2x75	ADENYLOSUCCINATE LYASE	STAPHYLOCOCCUS AUREUS	X-RAY	2.5	AMP
4efc	ADENYLOSUCCINATE LYASE	TRYPANOSOMA BRUCEI BRUCEI	X-RAY	2	AMP
1dj2	ADENYLOSUCCINATE SYNTHETASE	ARABIDOPSIS THALIANA	X-RAY	2.9	GDP
4m9d	ADENYLOSUCCINATE SYNTHETASE	BACILLUS ANTHRACIS	X-RAY	1.82	AMP
4m9da	ADENYLOSUCCINATE SYNTHETASE	BACILLUS ANTHRACIS	X-RAY	1.82	MLI
3r7t	ADENYLOSUCCINATE SYNTHETASE	CAMPYLOBACTER JEJUNI	X-RAY	2.3	CIT
5i34	ADENYLOSUCCINATE SYNTHETASE	CRYPTOCOCCUS NEOFORMANS VAR. GRUBII SEROTYPE A	X-RAY	1.53	GDP
5i34a	ADENYLOSUCCINATE SYNTHETASE	CRYPTOCOCCUS NEOFORMANS VAR. GRUBII SEROTYPE A	X-RAY	1.53	IMP
2gcq	ADENYLOSUCCINATE SYNTHETASE	ESCHERICHIA COLI	X-RAY	2	DOI
2gcqa	ADENYLOSUCCINATE SYNTHETASE	ESCHERICHIA COLI	X-RAY	2	GDP
1kkf	ADENYLOSUCCINATE SYNTHETASE	ESCHERICHIA COLI K12	X-RAY	2.6	DPO
1kkfa	ADENYLOSUCCINATE SYNTHETASE	ESCHERICHIA COLI K12	X-RAY	2.6	IMP
1iwe	ADENYLOSUCCINATE SYNTHETASE	MUS MUSCULUS	X-RAY	2.1	IMP
1p9b	ADENYLOSUCCINATE SYNTHETASE	PLASMODIUM FALCIPARUM	X-RAY	2	IMO
1p9ba	ADENYLOSUCCINATE SYNTHETASE	PLASMODIUM FALCIPARUM	X-RAY	2	GDP
5k7x	ADENYLOSUCCINATE SYNTHETASE	PYROCOCCUS HORIKOSHII OT3	X-RAY	2.8	GTP
5k7xa	ADENYLOSUCCINATE SYNTHETASE	PYROCOCCUS HORIKOSHII OT3	X-RAY	2.8	IMP
1dj3	ADENYLOSUCCINATE SYNTHETASE	TRITICUM AESTIVUM	X-RAY	3	GDP
2dgn	ADENYLOSUCCINATE SYNTHETASE ISOZYME 1	MUS MUSCULUS	X-RAY	2.4	DOI
2dgna	ADENYLOSUCCINATE SYNTHETASE ISOZYME 1	MUS MUSCULUS	X-RAY	2.4	GDP
2v40	ADENYLOSUCCINATE SYNTHETASE ISOZYME 2	HOMO SAPIENS	X-RAY	1.9	GDP
1ab8	ADENYLYL CYCLASE	RATTUS NORVEGICUS	X-RAY	2.2	FOK
3cr7	ADENYLYL-SULFATE KINASE	PENICILLIUM CHRYSOGENUM	X-RAY	2.5	ADP
3cr7a	ADENYLYL-SULFATE KINASE	PENICILLIUM CHRYSOGENUM	X-RAY	2.5	PPS
3uie	ADENYLYL-SULFATE KINASE 1, CHLOROPLASTIC	ARABIDOPSIS THALIANA	X-RAY	1.79	ADX
3uiea	ADENYLYL-SULFATE KINASE 1, CHLOROPLASTIC	ARABIDOPSIS THALIANA	X-RAY	1.79	ANP
1m7g	ADENYLYLSULFATE KINASE	PENICILLIUM CHRYSOGENUM	X-RAY	1.43	AV2
1m7ga	ADENYLYLSULFATE KINASE	PENICILLIUM CHRYSOGENUM	X-RAY	1.43	ADX
1m7gb	ADENYLYLSULFATE KINASE	PENICILLIUM CHRYSOGENUM	X-RAY	1.43	ADP
1jnr	ADENYLYLSULFATE REDUCTASE	ARCHAEOGLOBUS FULGIDUS DSM 4304	X-RAY	1.6	FAD
2fjb	ADENYLYLSULFATE REDUCTASE, SUBUNIT A	ARCHAEOGLOBUS FULGIDUS	X-RAY	1.7	SFD
2fjba	ADENYLYLSULFATE REDUCTASE, SUBUNIT A	ARCHAEOGLOBUS FULGIDUS	X-RAY	1.7	AMP
1zfn	ADENYLYLTRANSFERASE THIF	ESCHERICHIA COLI	X-RAY	2.75	ATP
3jv7	ADH-A	RHODOCOCCUS RUBER	X-RAY	2	NAD
3jv7a	ADH-A	RHODOCOCCUS RUBER	X-RAY	2	MPD
3ffo	ADHESIN	ESCHERICHIA COLI	X-RAY	2.1	NAG
2gr7	ADHESIN	HAEMOPHILUS INFLUENZAE	X-RAY	2.3	C8E
6eun	ADHESIN	NEISSERIA MENINGITIDIS	X-RAY	2.45	2PE
6euna	ADHESIN	NEISSERIA MENINGITIDIS	X-RAY	2.45	P4G
6eup	ADHESIN A	NEISSERIA MENINGITIDIS	X-RAY	2.65	MPD
6eupa	ADHESIN A	NEISSERIA MENINGITIDIS	X-RAY	2.65	P6G
5f7y	ADHESIN BINDING FUCOSYLATED HISTO-BLOOD GROUP ANTIGEN	LAMA GLAMA	X-RAY	2.44	GLC, GAL, NAG, A2G, FUC
5f7n	ADHESIN BINDING FUCOSYLATED HISTO-BLOOD GROUP ANTIGEN	VICUGNA PACOS	X-RAY	2.28	NAG, GAL, A2G, FUC
1adl	ADIPOCYTE LIPID-BINDING PROTEIN	MUS MUSCULUS	X-RAY	1.6	ACD
5lwy	ADIPONECTIN RECEPTOR PROTEIN 2	MUS MUSCULUS	X-RAY	2.4	OLA
3unv	ADMH	PANTOEA AGGLOMERANS	X-RAY	1.54	SFE
1vhz	ADP COMPOUNDS HYDROLASE NUDE	ESCHERICHIA COLI	X-RAY	2.32	APR
5ck7	ADP-DEPENDENT GLUCOKINASE	MUS MUSCULUS	X-RAY	2.99	AMP
1ua4	ADP-DEPENDENT GLUCOKINASE	PYROCOCCUS FURIOSUS	X-RAY	1.9	BGC
1ua4a	ADP-DEPENDENT GLUCOKINASE	PYROCOCCUS FURIOSUS	X-RAY	1.9	AMP
5o0j	ADP-DEPENDENT GLUCOKINASE	PYROCOCCUS HORIKOSHII (STRAIN ATCC 700860 / DSM	X-RAY	1.81	8BR
5o0ja	ADP-DEPENDENT GLUCOKINASE	PYROCOCCUS HORIKOSHII (STRAIN ATCC 700860 / DSM	X-RAY	1.81	GLC
4b8r	ADP-DEPENDENT GLUCOKINASE	THERMOCOCCUS LITORALIS	X-RAY	2.05	DTT
5o5y	ADP-DEPENDENT GLUCOKINASE,ADP-DEPENDENT GLUCOKINASE,ADP-	THERMOCOCCUS LITORALIS (STRAIN ATCC 51850 / DSM	X-RAY	1.92	GLC
6dfe	ADP-HEPTOSE--LPS HEPTOSYLTRANSFERASE	ESCHERICHIA COLI	X-RAY	2.31	KDO
6dfea	ADP-HEPTOSE--LPS HEPTOSYLTRANSFERASE	ESCHERICHIA COLI	X-RAY	2.31	GA7
4ej0	ADP-L-GLYCERO-D-MANNO-HEPTOSE-6-EPIMERASE	BURKHOLDERIA THAILANDENSIS	X-RAY	2.61	NAP
2x6t	ADP-L-GLYCERO-D-MANNO-HEPTOSE-6-EPIMERASE	ESCHERICHIA COLI	X-RAY	2.36	NAP
2x6ta	ADP-L-GLYCERO-D-MANNO-HEPTOSE-6-EPIMERASE	ESCHERICHIA COLI	X-RAY	2.36	ADP
3sxp	ADP-L-GLYCERO-D-MANNOHEPTOSE-6-EPIMERASE	HELICOBACTER PYLORI	X-RAY	2.55	NAD
[truncated: 5,015 more rows]

## Sheet: Similar protein
	Crystal Strucures Which Shown Similarity With SARS-CoV-2 Main Protease Ligand Binding Site
PDB ID	Protein/Enzyme	Organism scientific	Exp Method	Resolution	Lig_ID
2cgx	SERINE/THREONINE-PROTEIN KINASE CHK1	HOMO SAPIENS	X-RAY	2.2	3D3
2hch	ENDOPLASMIN	CANIS LUPUS FAMILIARIS	X-RAY	2.3	N5A
1g4k	STROMELYSIN-1 (MM3)	HOMO SAPIENS	X-RAY	2	HQQ
2bdz	MEXICAIN	JACARATIA MEXICANA	X-RAY	2.1	E64
1i1n	PROTEIN-L-ISOASPARTATE O-METHYLTRANSFERASE	HOMO SAPIENS	X-RAY	1.5	SAH
2dcc	CATHEPSIN B	BOS TAURUS	X-RAY	1.93	77B
2ftd	CATHEPSIN K	MACACA MULATTA	X-RAY	2.55	ILI
1xh8	CAMP-DEPENDENT PROTEIN KINASE, ALPHA-CATALYTIC	BOS TAURUS	X-RAY	1.6	R55
2ovz	MATRIX METALLOPROTEINASE-9 (EC 3.4.24.35) (MMP-9) (92 KDA	HOMO SAPIENS	X-RAY	2	5MR
2qio	ENOYL-(ACYL-CARRIER-PROTEIN) REDUCTASE	BACILLUS ANTHRACIS	X-RAY	2.44	NAD
1vbn	TYROSYL-TRNA SYNTHETASE	ESCHERICHIA COLI	X-RAY	2.7	YSA
2amd	3C-LIKE PROTEINASE	SARS CORONAVIRUS	X-RAY	1.85	9IN
3ens	FACTOR X LIGHT CHAIN	HOMO SAPIENS	X-RAY	2.3	ENS
1h8i	THROMBIN	HOMO SAPIENS	X-RAY	1.75	PHV
1gh0	C-PHYCOCYANIN ALPHA SUBUNIT	ARTHROSPIRA PLATENSIS	X-RAY	2.2	CYC
1hv5	STROMELYSIN 3	MUS MUSCULUS	X-RAY	2.6	RXP
3ig6	UROKINASE-TYPE PLASMINOGEN ACTIVATOR	HOMO SAPIENS	X-RAY	1.83	438
3ela	COAGULATION FACTOR VIIA LIGHT CHAIN	HOMO SAPIENS	X-RAY	2.2	0Z6
3ts1	TYROSYL-TRNA SYNTHETASE	GEOBACILLUS STEAROTHERMOPHILUS	X-RAY	2.7	TYA
3d4b	NAD-DEPENDENT DEACETYLASE	THERMOTOGA MARITIMA	X-RAY	1.9	DZD
2bok	COAGULATION FACTOR X	HOMO SAPIENS	X-RAY	1.64	784
1lpg	BLOOD COAGULATION FACTOR XA	HOMO SAPIENS	X-RAY	2	IMA
2cfd	PHENYLETHYLAMINE OXIDASE	ARTHROBACTER GLOBIFORMIS	X-RAY	1.6	R4A
2r9z	GLUTATHIONE AMIDE REDUCTASE	MARICHROMATIUM GRACILE	X-RAY	2.1	FAD
2i2a	PROBABLE INORGANIC POLYPHOSPHATE/ATP-NAD KINASE 1	LISTERIA MONOCYTOGENES	X-RAY	2.1	NAP
1tps	TRYPSIN	CYANOBACTERIA	X-RAY	1.9	B
2zzu	FACTOR VII LIGHT CHAIN	HOMO SAPIENS	X-RAY	2.5	359
2r9f	CALPAIN-1 CATALYTIC SUBUNIT	RATTUS NORVEGICUS	X-RAY	1.6	K2Z
1y3u	TRYPSIN, CATIONIC	BOS TAURUS	X-RAY	1.8	UIQ
3e0p	PROSTASIN	HOMO SAPIENS	X-RAY	1.7	B3C
2c4f	COAGULATION FACTOR VII PRECURSOR	HOMO SAPIENS	X-RAY	1.72	GIL
2wat	3-OXOACYL-[ACYL-CARRIER-PROTEIN] SYNTHASE	SACCHAROMYCES CEREVISIAE	X-RAY	2.2	COA
2z92	ANTI-CIGUATOXIN ANTIBODY 10C9 FAB HEAVY CHAIN	MUS MUSCULUS	X-RAY	2.3	ENE
1n5w	CARBON MONOXIDE DEHYDROGENASE SMALL CHAIN	OLIGOTROPHA CARBOXIDOVORANS	X-RAY	1.5	MCN
4aig	ADAMALYSIN II	CROTALUS ADAMANTEUS	X-RAY	2	FLX
1loj	SMALL NUCLEAR RIBONUCLEOPROTEIN HOMOLOG (SM-	METHANOTHERMOBACTER	X-RAY	1.9	URI
1r55	ADAM 33	HOMO SAPIENS	X-RAY	1.58	97
1s4p	GLYCOLIPID 2-ALPHA-MANNOSYLTRANSFERASE	SACCHAROMYCES CEREVISIAE	X-RAY	2.01	GDP
2b99	RIBOFLAVIN SYNTHASE	METHANOCALDOCOCCUS JANNASCHII	X-RAY	2.22	RDL
1x3w	PEPTIDE:N-GLYCANASE	SACCHAROMYCES CEREVISIAE	X-RAY	3	SUC
2zj5	PEPTIDE:N-GLYCANASE	SACCHAROMYCES CEREVISIAE	X-RAY	3	SUC
2o1x	1-DEOXY-D-XYLULOSE-5-PHOSPHATE SYNTHASE	DEINOCOCCUS RADIODURANS	X-RAY	2.9	TDP
2egv	UPF0088 PROTEIN AQ_165	AQUIFEX AEOLICUS	X-RAY	1.45	SAM
3a21	PUTATIVE SECRETED ALPHA-GALACTOSIDASE	STREPTOMYCES AVERMITILIS	X-RAY	1.51	GOL
3cw9	4-CHLOROBENZOYL COA LIGASE	ALCALIGENES SP.	X-RAY	2	AMP
3dhv	D-ALANINE-POLY(PHOSPHORIBITOL) LIGASE	BACILLUS CEREUS	X-RAY	2	AMP
1mmp	GELATINASE A	HOMO SAPIENS	X-RAY	2.3	RSS
1m0e	5'-D(P*CP*CP*AP*TP*GP*CP*GP*CP*TP*GP*AP*C)-3'	HAEMOPHILUS HAEMOLYTICUS	X-RAY	2.5	SAH
2c7q	MODIFICATION METHYLASE HHAI	SYNTHETIC CONSTRUCT	X-RAY	1.85	SAH
2i2c	PROBABLE INORGANIC POLYPHOSPHATE/ATP-NAD KINASE 1	LISTERIA MONOCYTOGENES EGD-E	X-RAY	1.85	DTA
1a3b	ALPHA-THROMBIN (SMALL SUBUNIT)	HIRUDO MEDICINALIS	X-RAY	1.8	T29
1z1n	SIXTEEN HEME CYTOCHROME	DESULFOVIBRIO GIGAS	X-RAY	2.1	HEC
1m21	PEPTIDE AMIDASE	STENOTROPHOMONAS MALTOPHILIA	X-RAY	1.8	C
2z3c	REPLICASE POLYPROTEIN 1AB (PP1AB)	SARS CORONAVIRUS	X-RAY	1.79	B
1xg0	PHYCOERYTHRIN ALPHA-3 CHAIN	RHODOMONAS SP. CS24	X-RAY	0.97	DBV
1xg0a	PHYCOERYTHRIN ALPHA-3 CHAIN	RHODOMONAS SP. CS24	X-RAY	0.97	PEB
2zu5	3C-LIKE PROTEINASE	SARS CORONAVIRUS	X-RAY	1.65	ZU5
3d23	3C-LIKE PROTEINASE	SYNTHETIC CONSTRUCT	X-RAY	2.5	F
2alv	REPLICASE POLYPROTEIN 1AB	SARS CORONAVIRUS	X-RAY	1.9	CY6
2uun	C-PHYCOCYANIN	LEPTOLYNGBYA SP.	X-RAY	3	CYC
2uul	C-PHYCOCYANIN ALPHA CHAIN	PHORMIDIUM SP.	X-RAY	3.1	CYC
2uum	C-PHYCOCYANIN ALPHA CHAIN	SPIRULINA SP.	X-RAY	3	CYC
1cpc	C-PHYCOCYANIN (ALPHA SUBUNIT)	FREMYELLA DIPLOSIPHON	X-RAY	1.66	CYC
2a5i	3C-LIKE PEPTIDASE	SARS CORONAVIRUS	X-RAY	1.88	AZP
2amp	3C-LIKE PROTEINASE	TRANSMISSIBLE GASTROENTERITIS VIRUS	X-RAY	2.7	I12
2qmp	POL POLYPROTEIN	HUMAN IMMUNODEFICIENCY VIRUS 1	X-RAY	1.8	A00
3ev1	RIBONUCLEASE PANCREATIC	BOS TAURUS	X-RAY	2	HEZ
2jih	ADAMTS-1	HOMO SAPIENS	X-RAY	2.1	97
1k4h	TRNA-GUANINE-TRANSGLYCOSYLASE	ZYMOMONAS MOBILIS	X-RAY	1.8	APQ
2qt6	LACCASE	LENTINUS TIGRINUS	X-RAY	1.5	CBS
1b8d	PROTEIN (RHODOPHYTAN PHYCOERYTHRIN (ALPHA CHAIN)	GRIFFITHSIA MONILIS	X-RAY	1.9	PEB
1xf6	PHYCOERYTHRIN ALPHA-3 CHAIN	RHODOMONAS SP. CS24	X-RAY	1.1	PEB
1qgw	PROTEIN (CRYPTOPHYTAN PHYCOERYTHRIN (ALPHA-1 CHAIN))	RHODOMONAS SP. CS24	X-RAY	1.63	DBV
1qgwa	PROTEIN (CRYPTOPHYTAN PHYCOERYTHRIN (ALPHA-1 CHAIN))	RHODOMONAS SP. CS24	X-RAY	1.63	PEB
2bm9	CEPHALOSPORIN HYDROXYLASE CMCI	STREPTOMYCES CLAVULIGERUS	X-RAY	2.94	SAM
1f2a	CRUZAIN	TRYPANOSOMA CRUZI	X-RAY	1.6	VS2
2ai7	PEPTIDE DEFORMYLASE	STREPTOCOCCUS PNEUMONIAE	X-RAY	2	SB7
3e9i	LYSYL-TRNA SYNTHETASE	BACILLUS STEAROTHERMOPHILUS	X-RAY	2.2	XAH
6gch	GAMMA-CHYMOTRYPSIN A	BOS TAURUS	X-RAY	2.1	APF
3cx4	GLYCOGEN SYNTHASE	ESCHERICHIA COLI	X-RAY	2.29	ADP
1rtk	COMPLEMENT FACTOR B	HOMO SAPIENS	X-RAY	2.3	GBS
1jhy	NICOTINATE MONONUCLEOTIDE:5,6-DIMETHYLBENZIMIDAZOLE	SALMONELLA ENTERICA	X-RAY	2	NIO
2wre	HEMAGGLUTININ	INFLUENZA A VIRUS	X-RAY	3	SIA
1jg2	PROTEIN-L-ISOASPARTATE O-METHYLTRANSFERASE	PYROCOCCUS FURIOSUS	X-RAY	1.5	ADN
3bjq	PHAGE-RELATED PROTEIN	BORDETELLA BRONCHISEPTICA RB50	X-RAY	2.05	PG4
2z94	REPLICASE POLYPROTEIN 1AB	SARS CORONAVIRUS	X-RAY	1.78	TLD
1ynr	CYTOCHROME C-552	HYDROGENOBACTER THERMOPHILUS	X-RAY	2	HEC
2a4o	PROBABLE PROTEIN P3C	HUMAN HEPATITIS A VIRUS HU/NORTHERN	X-RAY	1.55	BBL
1qa7	HAV 3C PROTEINASE	HEPATITIS A VIRUS	X-RAY	1.9	IVF
2e3x	COAGULATION FACTOR X-ACTIVATING ENZYME HEAVY CHAIN	DABOIA RUSSELLII SIAMENSIS	X-RAY	2.91	GM6
2qfl	INOSITOL-1-MONOPHOSPHATASE	ESCHERICHIA COLI	X-RAY	1.9	EEE
1tc6	ENDOPLASMIN	CANIS LUPUS FAMILIARIS	X-RAY	1.87	ADP
2op3	CATHEPSIN S	HOMO SAPIENS	X-RAY	1.6	TF5
1mxi	HYPOTHETICAL TRNA/RRNA METHYLTRANSFERASE HI0766	HAEMOPHILUS INFLUENZAE	X-RAY	1.7	SAH
1ya4	CES1 PROTEIN	HOMO SAPIENS	X-RAY	3.2	CTX
3cx5	CYTOCHROME B-C1 COMPLEX SUBUNIT 1, MITOCHONDRIAL	SACCHAROMYCES CEREVISIAE	X-RAY	1.9	SUC
1jr1	INOSINE-5'-MONOPHOSPHATE DEHYDROGENASE 2	CRICETULUS GRISEUS	X-RAY	2.6	MOA
3h4k	THIOREDOXIN GLUTATHIONE REDUCTASE	SCHISTOSOMA MANSONI	X-RAY	2.55	PG4
2pgn	CYCLOHEXANE-1,2-DIONE HYDROLASE (CDH)	AZOARCUS SP.	X-RAY	1.2	FAD
2pv7	T-PROTEIN [INCLUDES: CHORISMATE MUTASE (EC 5.4.99.5) (CM)	HAEMOPHILUS INFLUENZAE	X-RAY	2	NAD
3dcj	PROBABLE 5'-PHOSPHORIBOSYLGLYCINAMIDE	MYCOBACTERIUM TUBERCULOSIS	X-RAY	2.2	THH
1ual	TRNA (GUANINE-N(1)-)-METHYLTRANSFERASE	HAEMOPHILUS INFLUENZAE	X-RAY	1.8	SAH
3ci6	PHOSPHOENOLPYRUVATE-PROTEIN PHOSPHOTRANSFERASE	ACINETOBACTER SP.	X-RAY	1.55	P4G
2jkj	DR HEMAGGLUTININ STRUCTURAL SUBUNIT	ESCHERICHIA COLI	X-RAY	2.3	TH8
2z0y	PUTATIVE UNCHARACTERIZED PROTEIN TTHA0657	THERMUS THERMOPHILUS	X-RAY	2.8	SAM
2eva	TAK1 KINASE - TAB1 CHIMERA FUSION PROTEIN	HOMO SAPIENS	X-RAY	2	ADN
1bx4	PROTEIN (ADENOSINE KINASE)	HOMO SAPIENS	X-RAY	1.5	ADN
1fuj	PR3	HOMO SAPIENS	X-RAY	2.2	NAG, FUC
2cx8	METHYL TRANSFERASE	THERMUS THERMOPHILUS	X-RAY	2.53	SAH
2v3k	ESSENTIAL FOR MITOTIC GROWTH 1	SACCHAROMYCES CEREVISIAE	X-RAY	2	SAM
2bt0	HEAT SHOCK PROTEIN HSP90-ALPHA	HOMO SAPIENS	X-RAY	1.9	CT5
2iwx	ATP-DEPENDENT MOLECULAR CHAPERONE HSP82	SACCHAROMYCES CEREVISIAE	X-RAY	1.5	M1S
3bxs	PROTEASE	HIV Protease	X-RAY	1.6	DRS
1k4g	TRNA-GUANINE TRANSGLYCOSYLASE	ZYMOMONAS MOBILIS	X-RAY	1.7	AIQ
1jst	CYCLIN-DEPENDENT KINASE-2	HOMO SAPIENS	X-RAY	2.6	ATP
2cbf	COBALT-PRECORRIN-4 TRANSMETHYLASE	BACILLUS MEGATERIUM	X-RAY	3.1	SAH
2dqy	LIVER CARBOXYLESTERASE 1	HOMO SAPIENS	X-RAY	3	CHD
1jm6	PYRUVATE DEHYDROGENASE KINASE, ISOZYME 2	RATTUS NORVEGICUS	X-RAY	2.5	ADP
3e7x	D-ALANINE--POLY(PHOSPHORIBITOL) LIGASE SUBUNIT 1	BACILLUS SUBTILIS	X-RAY	2.6	AMP
1obo	FLAVODOXIN	ANABAENA SP.	X-RAY	1.2	FMN
1zh0	TYROSYL-TRNA SYNTHETASE	METHANOCALDOCOCCUS JANNASCHII	X-RAY	1.9	NAL
1yia	TRYPTOPHANYL-TRNA SYNTHETASE	DEINOCOCCUS RADIODURANS	X-RAY	3.7	HRP
1k2i	CHYMOTRYPSINOGEN A	BOS TAURUS	X-RAY	1.8	SN1
2v6n	REPLICASE POLYPROTEIN 1AB	HUMAN SARS CORONAVIRUS	X-RAY	1.98	XP1
1pvj	PYROGENIC EXOTOXIN B	STREPTOCOCCUS PYOGENES	X-RAY	3	ZFB
2uv4	5'-AMP-ACTIVATED PROTEIN KINASE SUBUNIT GAMMA-1	HOMO SAPIENS	X-RAY	1.33	AMP
12as	ASPARAGINE SYNTHETASE	ESCHERICHIA COLI K12	X-RAY	2.2	AMP
2zp1	TYROSYL-TRNA SYNTHETASE	METHANOCALDOCOCCUS JANNASCHII	X-RAY	1.7	IYR
1fq5	SACCHAROPEPSIN	SACCHAROMYCES CEREVISIAE	X-RAY	2.4	0GM
2vh9	CELLULASE	TROPAEOLUM MAJUS	X-RAY	2.1	BGC, XYS, GAL
2ow0	MATRIX METALLOPROTEINASE-9 (MMP-9) (92 KDA TYPE IV	HOMO SAPIENS	X-RAY	2	6MR
1jik	TYROSYL-TRNA SYNTHETASE	STAPHYLOCOCCUS AUREUS	X-RAY	2.8	545
11bg	PROTEIN (BOVINE SEMINAL RIBONUCLEASE)	BOS TAURUS	X-RAY	1.9	U2G
1szz	PEPTIDE DEFORMYLASE	LEPTOSPIRA INTERROGANS	X-RAY	3.3	BB2
2op9	REPLICASE POLYPROTEIN 1AB (PP1AB, ORF1AB) 3C-LIKE	SARS CORONAVIRUS	X-RAY	1.8	WR1
2euf	CDK6	HOMO SAPIENS	X-RAY	3	LQQ
2rjp	ADAMTS-4	HOMO SAPIENS	X-RAY	2.8	886
1me3	CRUZIPAIN	TRYPANOSOMA CRUZI	X-RAY	1.2	P10
1m6d	CATHEPSIN F	HOMO SAPIENS	X-RAY	1.7	MYP
2qyv	XAA-HIS DIPEPTIDASE	HAEMOPHILUS SOMNUS 129PT	X-RAY	2.11	GOL
2uvw	DNA POLYMERASE IV	SULFOLOBUS SOLFATARICUS	X-RAY	2.09	DGT
2a7x	PANTOATE-BETA-ALANINE LIGASE	MYCOBACTERIUM TUBERCULOSIS	X-RAY	1.7	AMP
2ddf	ADAM 17	HOMO SAPIENS	X-RAY	1.7	INN
2dw0	CATROCOLLASTATIN	CROTALUS ATROX	X-RAY	2.15	GM6
3d5j	GLUTAREDOXIN-2, MITOCHONDRIAL	SACCHAROMYCES CEREVISIAE	X-RAY	1.91	GSH
1hfs	STROMELYSIN-1	HOMO SAPIENS	X-RAY	1.7	L04
1xtp	LMAJ004091AAA	LEISHMANIA MAJOR	X-RAY	1.94	SAI
1oa2	ENDO-BETA-1,4-GLUCANASE	TRICHODERMA REESEI	X-RAY	1.5	NAG
1mjq	MUTATED MET CONSENSUS OPERATOR DUPLEX	ESCHERICHIA COLI	X-RAY	2.4	SAM
3h06	GLUTAMATE RECEPTOR 2	RATTUS NORVEGICUS	X-RAY	2.8	VBP
3cz0	PHEROMONE-BINDING PROTEIN ASP1	APIS MELLIFERA	X-RAY	1.7	9OD
2a3l	AMP DEAMINASE	ARABIDOPSIS THALIANA	X-RAY	3.34	CF5
2ess	ACYL-ACP THIOESTERASE	BACTEROIDES THETAIOTAOMICRON	X-RAY	1.9	MPD

## Sheet: Ligand dataset
	Dadatset of Compounds Used for Virtual Vcreening
Sr. No.	SIMILES Notation	Ligand Name	PUBCHEM ID
1	COCCOCCOC	Diglyme	8150
2	O[C@@H]1[C@@H](O)[C@H](C)O[C@H]([C@@H]1O)OC[C@H]2O[C@H]([C@H](O)[C@@H](O)[C@@H]2O)Oc(c3)cc(OCCO)c(c34)c(=O)cc(o4)-c5cc(O)c(OC)cc5	Hidrosmin	3087722
3	O[C@H]1[C@H](O)[C@@H](CO)O[C@H]([C@@H]1O)Oc(c2CC=C(C)C)cc(O)c(c23)c(=O)c(O[C@@H]([C@@H]4O)O[C@@H](C)[C@H](O)[C@H]4O)c(o3)-c5ccc(OC)cc5	Icariin	5318997
4	O[C@@H]1[C@@H](O)[C@H](C)O[C@H]([C@@H]1O)OC[C@H]2O[C@H]([C@H](O)[C@@H](O)[C@@H]2O)Oc(c3=O)c(-c4cc(O)c(O)cc4)oc(c35)cc(cc5O)OCCO	Monoxerutin	9852585
5	O[C@@H]1[C@@H](O)[C@H](C)O[C@H]([C@@H]1O)OC[C@H]2O[C@H]([C@H](O)[C@@H](O)[C@@H]2O)Oc(c3=O)c(oc(c34)cc(cc4O)OCCO)-c5cc(OCCO)c(cc5)OCCO	Troxerutin	5486699
6	O[C@@H]1[C@@H](O)[C@H](C)O[C@H]([C@@H]1O)OC[C@H]2O[C@H]([C@H](O)[C@@H](O)[C@@H]2O)Oc(c3)cc(O)c(c34)c(=O)cc(o4)-c5cc(O)c(OC)cc5	Diosmin	5281613
7	O[C@@H]1[C@@H](O)[C@H](C)O[C@H]([C@@H]1O)OC[C@H]2O[C@H]([C@H](O)[C@@H](O)[C@@H]2O)Oc(c3=O)c(-c4cc(O)c(O)cc4)oc(c35)cc(O)cc5O	Rutin	5280805
8	OC[C@H](O)[C@H]1OC(=O)C(O)=C1O	Ascorbic acid	54670067
9	NCCCNCCCCN	Spermidine	1102
10	ClCCN(N=O)C(=O)N[C@@H](C)P(=O)(OCC)OCC	Fotemustine	104799
11	CC[C@H](C)SSc1[nH]ccn1	PX-12	219104
12	CC(C)c1cc(C(C)C)cc(C(C)C)c1S(=O)(=O)N[C@@H](Cc2cc(C(\N)=N\[H])ccc2)C(=O)N3CCN(CC3)C(=O)OCC	WX-UK1	9895194
13	CN(C)CCSCc1cc(N)cc(c12)c(=O)[nH]c(n2)N	DB04004	135445363
14	O=c1[nH][nH]c(=O)c(c12)nc([nH]2)CCCC	DB02441	3465283
15	c1ccccc1SCc2cc(CN)cc(c23)c(=O)[nH]c(n3)N	DB04239	135509113
16	n1cc[nH]c1SCc2cc(N)cc(c23)c(=O)[nH]c(n3)N	DB04543	135460962
17	O=c1[nH]c(N)nc(c12)cc3c(c2)[nH]cn3	DB07012	135483591
18	n1c(N)[nH]c(=O)c(c2)c1cc(c23)nc([nH]3)N	DB07452	135566394
19	CC(C)(C)OC(=O)NCc1c[nH]c(c12)nc(N)[nH]c2=O	DB07481	135566413
20	C1COCCN1CCNc([nH]2)nc(c23)cc4c(c3)c(=O)[nH]c(n4)N	DB07564	135566918
21	n1c[nH]c(c12)cc3c(nc(N)[nH]c3=O)c2CCc4ccc(OC)cc4	DB07704	135476766
22	n1c[nH]c(c12)cc3c(nc(N)[nH]c3=O)c2CCc4ccccc4	DB08267	135438475
23	n1c[nH]c(c12)cc3c(nc(N)[nH]c3=O)c2CCc4ccc(C)cc4	DB08268	135414394
24	n1c(N)[nH]c(=O)c(c2)c1cc(c23)nc([nH]3)C	DB08511	135566422
25	n1c(N)[nH]c(=O)c(c2)c1cc(c23)nc([nH]3)NCc4cccc(c45)cccc5	DB08512	135566329
26	c1ccsc1CNc([nH]2)nc(c23)cc4c(c3)c(=O)[nH]c(n4)N	DB08514	135800218
27	C1=C[C@H](O)[C@H](O)[C@H]1NCc2c[nH]c(c23)nc(N)[nH]c3=O	Queuine	135398670
28	[O-][N+](=O)c(cn1)sc1Sc2sc(nn2)N	Halicin	11837140
29	O=[S@](C)c(cc1)ccc1\C=C(\C(C)=C2CC(=O)O)c(c23)ccc(F)c3	Sulindac	1548887
30	c1cc(F)cc(F)c1Oc(c(=O)n2C)cc(c23)cnc(n3)NC4CCOCC4	R-1487	11406590
31	c1cncnc1-c2c(-c3ccc(Cl)cc3)n[nH]c2C(CC4)CCN4C(=O)CO	SD-0006	9865587
32	c1cc(F)cc(F)c1COc(c(Br)c2=O)cc(C)n2-c3c(C)ccc(c3)C(=O)NC	PH-797804	22049997
33	Clc1cccc(Cl)c1-c(c(=O)nc2)c(n23)ccc(n3)Sc4c(F)cc(F)cc4	Neflamapimod	3038525
34	CN(C)C(=O)C(=O)c1cn(C)c(c12)cc(Cl)c(c2)C(=O)N([C@@H](C3)C)C[C@H](C)N3Cc4ccc(F)cc4	Talmapimod	9871074
35	c1cc(F)cc(F)c1-c2nc(ccc2C(=O)N)N(C(=O)N)c3c(F)cccc3F	VX-702	10341154
36	CCSCc(c1)ccc2c1c3c(CNC4=O)c4c5c(cc(cc6)CSCC)c6n(c5c3n2[C@@]78C)[C@H](O7)C[C@]8(O)C(=O)OC	CEP-1347	9917013
37	Clc1cnc(NC(C)C)cc1-c2cc([nH]c2)C(=O)N[C@H](CO)c3cc(Cl)ccc3	Ulixertinib	11719003
38	c1cc(F)ccc1-c(nc2)c(-c3nc(N)ncc3)n2C4CCNCC4	SB220025	5164
39	N[C@H](C)[C@H]1CC[C@@H](CC1)C(=O)Nc2ccncc2	Y-27632	448042
40	c1ccccc1C[C@H](N)COc(cnc2)cc2-c(c3)ccc(c34)n[nH]c4C	A-674563	11314340
41	C1CNCCCN1S(=O)(=O)c2cccc(c23)cncc3	Fasudil	3547
42	[O-][N+](=O)c(nc1)c(n1C)Sc2ncnc(c23)nc[nH]3	Azathioprine	2265
43	C1OC(=O)c(c12)c(O)c(c(OC)c2C)C/C=C(C)/CCC(=O)O	Mycophenolic acid	446541
44	c1cc(OC)ccc1S(=O)(=O)N(Cc2cccnc2)c3c(C)cccc3C(=O)NO	WAY-151693	4368
45	c1cc(Cl)ccc1C(=O)c(cc2)ccc2OC(C)(C)C(=O)O	Fenofibric acid	64929
46	SC[C@@H](C)C(=O)N1[C@H](C(=O)O)CCC1	Captopril	44093
47	O=NN(C)CC(=O)c1ccccc1	Endostatin	187888
48	N[C@H]1C(O)O[C@H](CO)[C@@H](O)[C@@H]1O	Glucosamine	439213
49	NC(N)=Nc(cc1)ccc1C(=O)Oc(cc2)cc(c23)ccc(c3)C(\N)=N\[H]	Nafamostat	4413
50	c1cc(Cl)sc1\C=C\S(=O)(=O)N[C@H](C2=O)CCN2[C@@H](C)C(=O)N3CCOCC3	GW-813893	9911502
51	CN1CCC(CC1)N2CCN(CC2)C(=O)[C@@H](c3ccccc3)NC(=O)c(c4)ccc(c45)cc[nH]5	LY-517717	9939865
52	c1cccc(c12)n(C)cc2C(C(=O)NC3=O)=C3c(c(c45)cccc5)cn4C(CC6)CCN6Cc7ncccc7	Enzastaurin	176167
53	c1ccc(C(=O)N)c(c12)nn(c2)-c(cc3)ccc3[C@@H]4CCCNC4	Niraparib	24958200
54	O=C(C)O[C@@H](C=C1)[C@@H]2Oc(c(cc3)OC(=O)C)c4c3C[C@H]([C@H]1[C@]245)N(C)CC5	Diamorphine	5462328
55	CCN(CC)CCOC(=O)c1c(OCCC)cc(N)cc1	Propoxycaine	6843
56	[C@@H]12N(C)[C@@H](CC1)C[C@@H](C2)OC(=O)[C@H](O)c3ccccc3	Homatropine	5282593
57	c1ccccc1O[P@](=O)(N[C@@H](C)C(=O)OC(C)C)CO[C@H](C)Cn2cnc(c23)c(N)ncn3	Tenofovir alafenamide	9574768
58	c1cccc(c12)CN([C@@H](C2)C(=O)O)C(=O)[C@H](C)N[C@H](C(=O)OCC)CCc3ccccc3	Quinapril	54892
59	C1CC(=O)[C@@H]2Oc(c(O)cc3)c4c3C[C@H]([C@]1([C@]245)O)N(CC5)CC=C	Naloxone	5284596
60	c1ccccc1[C@@](OC(=O)CC)([C@H](C)CN(C)C)Cc2ccccc2	Dextropropoxyphene	10100
61	O=S(=O)(C)NC(=O)COCCCCN(C(C)C)c1nc(-c2ccccc2)c(nc1)-c3ccccc3	Selexipag	9913767
62	C1COCCN1CCOC(=O)CC\C(C)=C\Cc(c(OC)c2C)c(O)c(c23)C(=O)OC3	Mycophenolate mofetil	5281078
63	Fc1cccc(F)c1Cn2nnc(c2)C(=O)N	Rufinamide	129228
64	CCOC(=O)c1ccc(N)cc1	Benzocaine	2337
65	CC(C)(C)c1c(O)c(C(C)(C)C)cc(c1)SC(C)(C)Sc(c2)cc(C(C)(C)C)c(O)c2C(C)(C)C	Probucol	4912
66	CC1(C)C[C@@H](C)C[C@H](C1)OC(=O)[C@H](O)c2ccccc2	Cyclandelate	2893
67	C[N+](C)(C)C[C@H](O)CC([O-])=O	Levocarnitine	10917
68	C1CCCCC1[C@H](O2)O[C@]3(C(=O)COC(=O)C(C)C)[C@H]2C[C@H]([C@@]34C)[C@H]5[C@H]([C@@H](O)C4)[C@]6(C)C(CC5)=CC(=O)C=C6	Ciclesonide	6918155
69	C1C[C@@H](O)C[C@@H](C[C@H]2O)[C@@]1(C)[C@@H](C[C@@H]3O)[C@@H]2[C@@H]([C@]34C)CC[C@@H]4[C@H](C)CCC(=O)O	Cholic Acid	221493
70	CC[C@H](C)C(=O)O[C@H]1CCC=C([C@H]12)C=C[C@H](C)[C@@H]2CC[C@H]3OC(=O)C[C@H](O)C3	Mevastatin	64715
71	c1cc(Cl)ccc1C(=O)n(c(C)c2CC(=O)O)c(c23)ccc(c3)OC	Indomethacin	3715
72	O[C@@H]1[C@H](O)[C@@H](C)O[C@H]1n2cc(F)c(nc2=O)NC(=O)OCCCCC	Capecitabine	60953
73	c1ccc(C(C)C)c(c1C(C)C)OS(=O)(=O)NC(=O)Cc2c(C(C)C)cc(C(C)C)cc2C(C)C	Avasimibe	166558
74	c1ccc(Br)cc1-c(nc([n+]23)nc[nH]2)cc3NCc4ccncc4	DB04669	5327131
75	Clc(c1)cc(N)cc1Nc(nc(n2)N[C@@H](C(C)C)CO)c(c23)ncn3C(C)C	DB07379	6914609
76	c1cccnc1S(=O)(=O)N2[C@H](C)CC[C@@H](C(=O)C2)NC(=O)[C@H](CC(C)C)NC(=O)c(c3)oc(c34)cccc4	Relacatib	6918602
77	c1ccccc1NC(=S)N[C@@H](CC(C)C)C(=O)N[C@H]2C[C@@H](O)OC2	DB07627	6857711
78	c1cc(O)ccc1C[C@@H](C(=O)CF)NC(=O)[C@H](CC(C)C)NC(=O)[C@H](CC(C)C)NC(=O)OCc2ccccc2	DB04653	11505008
79	O=c1cc(C(=O)O)oc(c2CCC)c1cc(c23)c(=O)cc(C(=O)O)n3CC	Nedocromil	50294
80	Clc(c1)c(O)cc(O)c1-c2[nH]ncc2C(=O)Nc3ccc(cc3)C(=O)C	DB06956	5287469
81	Cc1c(O)c(c2O)c3c(C4=O)c1O[C@]4(C)O\C=C\[C@H](OC)[C@@H](C)[C@@H](OC(=O)C)[C@H](C)[C@H](O)[C@H](C)[C@@H](O)[C@@H](C)/C=C/C=C(C)\C(=O)/N=c2/c(=N5)c3NC56CCN(CC6)CC(C)C	Rifabutin	135398743
82	n1cnc(N)c(c12)c(I)cn2[C@@H]3O[C@H](C)[C@@H](O)[C@H]3O	5-iodo,5'-deoxytubercidin	9842606
83	OC[C@H]1O[C@H]([C@H](O)[C@@H]1O)n2nc(nc2)C(=O)N	Ribavirin	37542
84	OC(=O)[C@@H]1N[C@H]1C(=O)N[C@@H](CC(C)C)C(=O)N[C@@H](CC(C)C)[C@@H](O)CC(=O)N[C@@H](CC)C(=O)N[C@H](/C=C/C(=O)O)CCCN=C(N)N	Miraziridine A	10770715
85	O=C(N)CC[C@@H](CO)NC(=O)[C@H](CO)NC(=O)[C@H](Cc1ccccc1)NC(=O)[C@H](CO)NC(=O)[C@@H](NC(=O)C)CC(=O)N	Ac-NSFSQ-H	72200567
86	O[C@H]1[C@H](O)[C@@H](CO)O[C@H]([C@@H]1O)Oc(c2=O)c(-c3cc(O)c(O)cc3)oc(c24)cc(O)cc4O	Isoquercitrin	5280804
87	O[C@H]1[C@@H](O)[C@@H](CO)O[C@H]([C@@H]1O)Oc(c2=O)c(-c3cc(O)c(O)cc3)oc(c24)cc(O)cc4O	Hyperoside	5281643
88	OC(=O)[C@@H](C1)[C@]12C[C@H](NC2=O)c3ccc(cc3)OCc4cc(nc(c45)cccc5)-c6ccccc6	642	25049750
89	ONC(=O)[C@@H](C1)[C@]1(C(=O)OC)Cc2ccc(cc2)OCc3cc(C)nc(c34)cccc4	550	24800833
90	ONC(=O)[C@@H](C1)[C@]1(C(=O)N)Cc2ccc(cc2)OCc3cc(nc(c34)cccc4)-c5ccccc5	615	24978491
91	SCCCS(=O)(=O)c1ccc(cc1)OCC#CC	440	23627203
92	CC#CCOc(cc1)ccc1S(=O)(=O)N[C@@H](C(=O)O)Cc2c[nH]c(c23)ccc(c3)C	792	42627769
93	ONC(=O)[C@@H](C)N(C1=O)CC[C@@]1(C)c2ccc(cc2)OCc3cc(C)nc(c34)cccc4	IK682	6914621
94	O=S(=O)(C)NCc(cc1)ccc1C(N(O)C=O)CS(=O)(=O)c2ccc(cc2)OCC#CC	KP475
95	CC(C)C[C@@H](C(=O)O)NC(=O)[C@H]([C@@H](C)CC)NC(=O)[C@@H](CC(=O)NO)Cc1ccccc1	JMV 390-1	5487524
96	CC#CCOc(cc1)ccc1S(=O)(=O)CC2(C(=O)NO)CCN(CC2)S(=O)(=O)c3c(C)onc3C	KGY	11963536
97	CC1(C)SCCN([C@H]1C(=O)NO)S(=O)(=O)c2ccc(cc2)OCC#CCN	4NH	6102708
98	CC1(C)SCCN([C@H]1C(=O)NO)S(=O)(=O)c2ccc(cc2)OCC#CC	IH6	5288615
99	ONC(=O)C[C@@H](CC(C)C)C(=O)N[C@@H](C(C)(C)C)C(=O)N[C@@H](C)C(=O)NCCN	INN	444587
100	c1ccccc1C[C@H](C(=O)N2[C@@H](CCC2)C(=O)OC)N(C)C(=O)CNC(=O)[C@H]([C@@H](C)CC)NC(=O)C[C@H](O)[C@H](Cc3ccccc3)NC(=O)[C@H](CCC(=O)N)N(C)C(=O)[C@H]([C@@H](C)CC)NC(=O)[C@@H](O)C	Tasiamide F	127050883
101	c1ccccc1S(=O)(=O)/C=C\[C@H](CCC)NC(=O)[C@H](Cc2ccccc2)NC(=O)N3CCC(CC3)N4CCOCC4	MYP	6323426
102	c1cccc(c12)[nH]c(O)c2C(C3=O)=Nc(c34)cccc4	Indirubin	10177
103	c1cccc(c12)cncc2-c(ncc3)cc3C(=O)c(n4)[nH]c(c45)ccc(n5)N6CCC(N(C)C)CC6	0RS	49785477
104	c1cc[nH]c1C(=O)c([nH]2)nc(c23)cccc3	4AU	70689160
105	C1CCCC1n2c(c3c(c24)ccnc4)nc(nc3)Nc(nc5)ccc5N6CCNCC6	24V	44132585
106	c1ccc(Cl)cc1Nc(nc(n2)N[C@H](C(C)C)CO)c(c23)ncn3C(C)C	Purvalanol A	456214
107	OC[C@@H](CC)Nc(n1)nc(c(c12)ncn2C(C)C)NCc3c(O)cccc3	Olomoucine II	5494414
108	C1CCCCC12n3c(C(=O)NC2)cc4c3nc(nc4)Nc(nc5)ccc5N6CCN(C)CC6	Trilaciclib	68029831
109	FC(F)(F)c(cc1)cc(Cl)c1-c(o2)cc(=O)c(c23)c(O)cc(O)c3[C@H](CC4)[C@@H](N4C)CO	Voruciclib	67409219
110	Clc(c1)cc(N)cc1Nc(nc(n2)N[C@H](C(C)C)CO)c(c23)ncn3C(C)C	Aminopurvalanol	6604931
111	c1cc(O)cc(c12)oc(c(O)c2=O)-c3cc(O)c(O)cc3	Fisetin	5281614
112	CN1CCC(CC1)Nc2nc(ccn2)-c3cn[nH]c3C(C)C	3NU	49800099
113	CC(C)c1[nH]nc(Cl)c1-c2nc(ncc2)Nc(nc3)ccc3N4CCNCC4	3NV	49800100
114	C1CCCCC1C[C@@H](C(O)(O)C(F)(F)C(=O)NC)NC(=O)[C@H](CCCC)NC(=O)[C@H](Cc2ccccc2)NC(=O)N3CCOCC3	2Z3	445400
115	CC(C)C[C@@H](C(=O)NC1)NC(=O)C[C@H](O)[C@H](CC(C)C)NC(=O)[C@H](CCC(=O)NCc(cc12)ccc2)NC(=O)C(Cc3cccc(c34)cccc4)Cc5cccc(c56)cccc6	0GM	5289412
116	C1CCCCC1C[C@@H]([C@@H](O)C(F)(F)C(=O)NC)NC(=O)[C@H](CCCC)NC(=O)[C@H](Cc2ccccc2)NC(=O)N3CCOCC3	2Y4	10077847
117	C1CCCCC1C[C@@H]([C@@H](O)C[C@H](CC(C)C)C(=O)NC)NC(=O)[C@H](Cc2[nH]cnc2)NC(=O)[C@@H](NC(=O)OC(C)(C)C)Cc3ccccc3	2Y3	6323453
118	c1cccnc1CC(=O)Nc(nn2)sc2CCCCc3nnc(cc3)NC(=O)Cc4cc(OC(F)(F)F)ccc4	Telaglenastat	71577426
119	c1ccccc1CC(=O)Nc(nn2)sc2CCSCCc3sc(nn3)NC(=O)Cc4ccccc4	BPTES	3372016
120	O=S(=O)(N)OC[C@]12[C@@H](OC(O2)(C)C)[C@H]3[C@@H](CO1)OC(O3)(C)C	Topiramate	5284627
121	OC(=O)[C@@H](N)CNC(=O)N	Albizziin	92891
122	c1ccccc1COC(=O)N[C@H](C(=O)C[N+]#N)Cc2ccccc2	ZFB	17754225
123	c1ccccc1CNC(=O)[C@@H](O)[C@H](C[C@@H]2CCNC2=O)NC(=O)[C@H](Cc3ccccc3)NC(=O)/C=C/c4ccccc4	D03	137349146
124	c1ccccc1CNC(=O)[C@](S)(O)[C@H](C[C@H]2C(=O)NCC2)NC(=O)[C@H](CC(C)C)NC(=O)CCc3ccccc3	E8E	137551979
125	c1ccccc1CNC(=O)[C@](S)(O)[C@H](C[C@H]2C(=O)NCC2)NC(=O)[C@H](CC3CC3)NC(=O)/C=C/c4ccccc4	8O5	132451771
126	C1COCCN1c(cc2=O)nc(n23)c(cc(c3)C)[C@@H](C)Nc4c(C(=O)O)cccc4	AZD6482	44137675
127	c1ccccc1CNC(=O)[C@](S)(O)[C@H](C[C@@H]2CCNC2=O)NC(=O)[C@H](CC3CC3)n4c(=O)c(ccc4)NC(=O)OC(C)(C)C	O6K	146018277
128	O=C1NCC[C@H]1C[C@@H](CCC(=O)OCC)NC(=O)[C@H](CC=C(C)C)CC(=O)[C@H](C(C)C)NC(=O)[C@H](CO)NC(=O)OC(C)(C)C	CYV	23727976
129	C1CNC(=O)[C@@H]1C[C@H](NC(=O)OC(C)(C)C)[C@@](S)(O)C(=O)NCc2ccccc2	8X8	133084062
130	Clc1cc(Cl)c(C)cc1S(=O)(=O)c2c([N+]([O-])=O)cc(C(F)(F)F)cc2[N+]([O-])=O	BDBM11292	2799606
131	FC(F)(F)c1[nH]nc(n1)SC(=O)c2oc(cc2)C#Cc3ccccc3	CHEBI:42403	2822496
132	Nc(c1)ccc(C)c1C(=O)N[C@H](C)c2cccc(c23)cccc3	GRL0617	24941262
133	OCCC(=O)[C@@H](C)NC(=O)[C@H](Cc1ccccc1)NC(=O)OCc2ccccc2	DB08732	16220131
134	CCC(CC)COC(=O)[C@H](C)N[P@@](=O)(Oc1ccccc1)OC[C@H]([C@@H](O)[C@H]2O)O[C@@]2(C#N)c3ccc(n34)c(N)ncn4	Remdesivir	121304016
135	O[C@@H]1[C@H](O)[C@@H](CO)O[C@@]1(C#N)c2ccc(n23)c(N)ncn3	GS-441524	44468216
136	O=C(C)CNC(=O)OCc1ccccc1	benzyl (2-oxopropyl)carbamate	22747857
137	c1c(C)cc(C)cc1Nc(n2)nc(N3CCOCC3)nc2NC4CCCCC4	F2704-0451	18580381
138	c1cccc(c12)sc(c2)[C@@](O)(C)CNC(=O)CN3C(=O)CCC3=O	F6414-3612	86263948
139	c1ccccc1S(=O)(=O)CCC(=O)N[C@H](C)Cc2occc2	F5831-1969	49676477
140	c1ccc(Cl)cc1N(CC2)CCN2c(n3CC(=O)O)nc(c34)n(C)c(=O)n(c4=O)C	F5038-0132	42109343
141	c1cc(O)cc(O)c1S(=O)(=O)n(c2)cc(c23)ccc(c3)NC(CC4)CCN4C(=O)[C@@H](N)CC(=O)N	P46	124037106
142	c1cc(O)cc(O)c1S(=O)(=O)N(C2)Cc(c23)ccc(c3)NC4CCNCC4	P35	118155906
143	Cc1cnc(Cl)nc1-c(cc2)ccc2N(C(=O)c3c(O)cc(O)cc3)Cc4ccc(cc4)CN5CCCC5	7FE	117972658
144	c1cc(O)cc(O)c1C(=O)N([C@@H](C)CC2)c(c23)ccc(c3)-c(n4)c(C)cc(c45)cccc5	7FV	124201644
145	c1cc(O)cc(O)c1C(=O)N(Cc2ccccc2)c3ccc(cc3)C(=O)N(C)Cc(c4)ccc(c45)nccn5	7FW	117972517
146	Cc1cnc(Cl)nc1-c(cc2)ccc2N(C(=O)c3c(O)cc(O)cc3)Cc4ccc(cc4)CNC(=O)C(F)F	VER-246608	86280454
147	FC(F)(F)[C@@](O)(C)C(=O)Nc(cc1)c(Cl)cc1S(=O)(=O)c2ccc(cc2)C(=O)N(C)C	AZD7545	16741245
148	c1cc(OC)c(OC)cc1[C@](C#N)(C(C)C)CCCN(C)CCc2cc(OC)c(OC)cc2	Verapamil	2520
149	c1cccc(c12)S[C@@H](c3ccc(OC)cc3)[C@@H](OC(=O)C)C(=O)N2CCN(C)C	Diltiazem	39186
150	O=C1NC(=O)S[C@H]1Cc(cc2)ccc2OC[C@@](C)(CC3)Oc(c34)c(C)c(C)c(O)c4C	Troglitazone	5591
151	BrC(Br)=C[C@H](C1(C)C)[C@H]1C(=O)O[C@H](C#N)c2cc(ccc2)Oc3ccccc3	Deltamethrin	40585
152	CC(C)=CCc1c(O)c(ccc1O)C(=O)/C=C/c2ccc(O)cc2	Corylifolinin	5281255
153	CC(C)=CCC[C@](O)(C)[C@@H](CC1)[C@H]([C@]1(C)[C@@]23C)[C@H](O)C[C@@H]2[C@]4(C)[C@@H]([C@@H](O)C3)C(C)(C)[C@@H](O)CC4	Protopanaxatriol	9847853
154	CC(C)=CCC[C@](O)(C)[C@@H](CC1)[C@H]([C@]1(C)[C@@]23C)[C@H](O)C[C@@H]2[C@]4(C)[C@@H](CC3)C(C)(C)[C@@H](O)CC4	Protopanaxadiol	9920281
155	[O-][N+](=O)c(cc1)c(C(F)(F)F)cc1NC(=O)C(C)C	Flutamide	3397
156	[C@H]12N(C)[C@@H](CC2)C[C@@H]([C@@H]1C(=O)OC)OC(=O)c3ccccc3	Cocaine	446220
157	C1CN(C)CCC1(C(=O)OCC)c2ccccc2	Meperidine	4058
158	C1CC[C@@H](C(=O)O)N1C(=O)[C@H](C)N[C@H](C(=O)OCC)CCc2ccccc2	Enalapril	5388962
159	OC(C)(C)CCC[C@@H](C)[C@H]1CC[C@H]([C@@]12C)/C(CCC2)=C/C=C3/C[C@@H](O)C[C@H](O)C3=C	Calcitriol	5280453
160	n1csc2c1ccc(c23)[nH]c(O)c3\C=N\c(cc4)ccc4S(=O)(=O)Nc5ncccc5	GW8510	3536
161	CNC(=O)c1nn(C)c(c12)c3c(CC2(C)C)cnc(n3)Nc(cc4)ccc4N5CCN(C)CC5	Milciclib	16718576
162	C1N(C)C/C=C/CCOc(ccc2)cc2c(ccn3)nc3Nc(cc14)ccc4	TG02	16739650
163	O[C@H](C)[C@H](CC)Nc(n1)nc(c(c12)ncn2C(C)C)NCc3c(C)cc(C)nc3	Cyc065	24983461
164	O=S(=O)(N)c(cc1)ccc1Nc(nc(c23)nc[nH]2)nc3OCC4CCCCC4	NU6102	4566
165	C1CCCCC1COc2nc(N)nc(c23)nc[nH]3	NU2058	4564
166	Fc(c1)cc(F)c(c12)nc([nH]2)-c3n[nH]c(c34)ccc(c4)-c5c(C)c(cnc5)CNCC	AG-024322	135413565
167	O=S(=O)(C)N1CCC(CC1)Nc2nc(N)c(cn2)C(=O)c3c(OC)ccc(F)c3F	R547	6918852
168	Clc1cccc(Cl)c1C(=O)Nc2cn[nH]c2C(=O)NC3CCNCC3	AT7519	11338033
169	Cc1nc(NC)sc1-c(c(cn2)C#N)nc2Nc(ccc3)cc3C(=O)N4CCOCC4	TJF	44253188
170	Cc1nc(NC)sc1-c2nc(ncc2C#N)Nc3cc(O)ccc3	T9N	44253187
171	C1COCCN1S(=O)(=O)c2c(C)ccc(c2)Nc3nc(c(cn3)C#N)-c4sc(NC)nc4C	T7Z	44224280
172	C1CCCCC1COc2nc(N)nc(c23)nc([nH]3)-c4c(C)c(C(=O)O)ccc4	2WC	76324891
173	O=S(=O)(N)c(cc1)ccc1Nc(nc(c23)nc[nH]2)nc3OCC4CCCCC4	4SP	4566
174	c1ccsc1C/N=C(NC2=O)\S\C2=C\c(c3)ccc(c34)nccc4	1RO	135398497
175	CN(C)C(=O)CNC(=O)c1c(O)cccc1	Salicylamide	199587
176	O=S(=O)(N)c(cc1)ccc1Nc(nc(c23)nc[nH]2)nc3-c4cc(ccc4)-c5ccccc5	CDK2-IN-4	123132899
177	c1cc(O)ccc1\N=N\c2c(N)[nH]nc2N	CAN508	135398514
178	c1ccc(S(=O)(=O)N)cc1-c([nH]2)nc(c23)nc(N)nc3OCC4CCCCC4	G6T	76324893
179	c1ccc(S(=O)(=O)N)c(C)c1-c([nH]2)nc(c23)nc(N)nc3OCC4CCCCC4	SQ9	72201003
180	FC(F)(F)c([nH]1)nc(c12)nc(N)nc2OCC3CCCCC3	JYM	72201002
181	C1CCCCC1COc2nc(N)nc(c23)nc([nH]3)-c4c(C)cccc4	4QE	75593439
182	C1CCCCC1COc2nc(N)nc(c23)nc([nH]3)-c4c(C)c(O)ccc4	75X	76310335
183	C=CS(=O)(=O)c(cc1)ccc1Nc(nc(c23)nc[nH]2)nc3OCC4CCCCC4	NU6300	118704754
184	OC[C@@H](CC)Nc(n1)nc(c(c12)ncn2C(C)C)NCc3ccccc3	Seliciclib	160355
185	c1cccnc1NS(=O)(=O)c(cc2)ccc2NCC3C(=O)N=c(c=34)ccc5c4scn5	107	1712
186	NCCSc(n1)nc(c(c12)n[nH]c2C(C)C)NCc3ccc(cc3)-c4ncccc4	LGR4455	138105941
187	COc(c1)ccc(c12)NC(=O)C\2=C/c3[nH]cnc3	SU9516	5289419
188	OC(=O)Cc(ccc1)cc1-c2nc(N)nc(c23)nc[nH]3	HJK	137552068
189	OC(=O)Cc1cc(ccc1)Oc2nc(N)nc(c23)nc[nH]3	HGH	137552069
190	Ic1nc(N)nc(c12)nc[nH]2	HH5	6101575
191	c1cc(Br)cc(OC)c1CC(=O)O	HHT	53403621
192	c1cc(Cl)ccc1NC(=O)c2cc(ccc2)/C=C/C(=O)O	HHW	61528883
193	c1c[nH]c(=O)cc1Oc2ccc(cc2)CC(=O)O	HGK	137552070
194	c1cc(O)cc(O)c1C(=O)c2ccccc2	HHB	8572
195	C1CN(C)CCN1Cc2c(C(F)(F)F)cc(cc2)NC(=O)Nc3ccc(cc3)Oc4nc(N)ncc4	LQ5	11260561
196	c1cc(Cl)c(F)cc1[C@@H](CO)n2c(=O)cc(cc2)-c3nc(ncc3)Nc4ccnn4C	Ravoxertinib	71727581
197	C1CNC[C@@H](O)[C@@H]1CNc(nc([n+]23)c(C(C)C)c[nH]2)cc3NCc4ccccc4	ICEC0943	124081173
198	C1CNC[C@H](O)[C@H]1CNc(nc(n23)c(cn2)C(C)C)cc3NCc4ccccc4	ICEC0942	91844733
199	c1cccc(c12)c(=O)cc([nH]2)CCCCCCC	HHQ	164974
200	OC(=O)c(cc1)ccc1C(=O)Nc(c2)n[nH]c2C3CC3	4CK	5330976
201	N=C(N)NS(=O)(=O)c1ccc(cc1)N\C=C\2C(=O)Nc(c23)cccc3	LS5	4477132
202	CN(C)c1c(Cl)cc(cc1)Nc(ncc2)nc2-c3sc(C)nc3C	20K	6539303
203	Cc1nc(C)sc1-c2nc(N)ncc2	CK2	447956
204	C1CCCN1CCOc2ccc(cc2)CC(=O)Nc(c3)n[nH]c3C4CC4	11K	5331001
205	FC(F)(F)Oc(cc1)ccc1CC(=O)Nc(c2)n[nH]c2C3CC3	09K	5331002
206	O=S(=O)(N)c1ccc(cc1)\N=N\c2c(O)[nH]c(c23)ccc(c3)C(=O)OCC(C)C	62K	136259518
207	O=S(=O)(N)c(cc1)ccc1\N=N\c2c(O)[nH]c(c23)ccc(c3)C(=O)NCCc4[nH]cnc4	61K	135434987
208	O=S(=O)(N)c1ccc(cc1)\N=N\c2c(O)[nH]c(c23)ccc(c3)C(=O)O	60K	135465639
209	CN(C)CCNS(=O)(=O)c1ccc(cc1)/N=C/c2c(O)[nH]c(c23)cccc3	48K	135421157
210	n1csc2c1ccc(c23)[nH]c(O)c3\C=N\c(cc4)ccc4S(=O)(=O)NC(=O)C	46K	135421156
211	s1cnc(c1c=23)ccc3=NC(=O)C2CNc(c4)ccc(c45)CS(=O)(=O)C5	45K	71306447
212	O=S(=O)(N)c(cc1)ccc1\N=N\C2C(=O)N=c3ccc(c4c=23)[nH]nn4	42K	162169633
213	O=S(=O)(N)c1ccc(cc1)/N=N/c2c(O)[nH]c(=O)cc2	NSC 134199	281416
215	Cc1nc(C)sc1-c2nc(ncc2)Nc3cc([N+]([O-])=O)ccc3	16K	136259518
216	c1ccsc1-c(cc2)ccc2CC(=O)Nc(c3)n[nH]c3C4CC4	10K	5331007
217	O=C(N)c(cc1)ccc1C(=O)Nc(c2)n[nH]c2C3CC3	03K	5330977
218	c1cc(Br)ccc1C(=O)Nc2n[nH]c(c2)C	1CK	5330990
219	c1cc(=O)[nH]nc1S(=O)(=O)c(c2)oc(c23)ccc(c3)OC	19K	11551271
220	c1cc(Cl)ccc1S(=O)(=O)C[C@@H](NS(=O)(=O)C)C(=O)N[C@@H](Cc2ccccc2)[C@H](O)Cc3c(C(=O)NC(C)(C)C)cccc3	18K	462311
221	O=S(=O)(N)c(cc1)ccc1Nc(nc2N)sc2C(=O)c3c(C)cccc3	RC-3-96	66553076
222	O=C(N)c(c(n1)N)sc1Nc2ccccc2	RC-2-23	13349420
223	O=S(=O)(N)c(cc1)ccc1Nc(nc2N)sc2C(=O)c3cc(N)ccc3	RC-2-88	66553071
224	c1ccccc1Nc(nc2N)sc2[C@H](O)c3cc(C(F)(F)F)ccc3	RC-2-49	66553070
225	O=S(=O)(N)c1ccc(cc1)Nc2sc(c(n2)N)C(=O)N	RC-2-40	66553072
226	O[C@@H](C1)[C@@H](O)CN1c2cc(c(O)cc2)-c3nc(N)nc(c3)C(C)C	PMU	135566570
227	c1ncccc1CNc(c(C(=O)N)cc2[N+]([O-])=O)cc2NCCCCCC	KVR-1-154	57519681
228	c1cc(OC)ccc1[C@@H](O)c2sc(nc2N)Nc3ccc(S(=O)(=O)N)cc3	RC-2-39	66553075
229	c1ncccc1CNc(c(C(=O)N)cc2[N+]([O-])=O)cc2NCCCC(=O)O	KVR-1-156	57519682
230	c1cc(Cl)sc1C(=O)c(c(n2)N)sc2NCCC	Z60	66553073
231	CCCNc(nc1N)sc1[C@H](O)c2ncccc2	RC-1-138	66553074
232	c1ccc(S(=O)(=O)N)cc1Nc2sc(c(n2)N)C(=O)c3ccccc3	RC-3-86	66553069
233	c1cc(O)ccc1CNc2c(C(=O)N)cc([N+]([O-])=O)cc2	KVR-1-91	25163869
234	C1CNCCN1CCNc2c([N+]([O-])=O)cc(C(=O)N)c(c2)NCc3cnc(N)nc3	KVR-2-80	57519680
235	O=S(=O)(N)c(cc1)ccc1Nc(nc2N)sc2C(=O)c(c3)ccc(c34)cccc4	RC-2-33	66553068
236	Nc1nc(NC(C)C)sc1[C@H](O)c2cccnc2	RC-2-74	66553066
237	c1ncccc1[C@@H](O)c2sc(nc2N)Nc3ccc(cc3)C(=O)N	RC-2-71	66553065
238	c1ncccc1[C@@H](O)c2sc(nc2N)Nc3ccc(cc3)C(=O)O	RC-2-72	66553064
239	c1ncccc1C(=O)c(c(n2)N)sc2NC3CCCCC3	RC-2-73	66553067
240	c1ccc(F)cc1Nc(nc2N)sc2C(=O)c3ccccc3	06Z	1504410
241	C1COCCN1CCCNc2cc(c(C(=O)N)cc2[N+]([O-])=O)NCc3cccnc3	KVR-1-160	57519679
242	C1CCCCC1Nc2sc(c(n2)N)[C@@H](O)c(c3)ccc(c34)cccc4	RC-2-22	66553061
243	c1ccc(OC)cc1[C@@H](O)c2sc(nc2N)Nc3ccc(S(=O)(=O)N)cc3	RC-2-34	66553063
244	c1ccccc1[C@@H](O)c2sc(nc2N)Nc3ccc(S(=O)(=O)N)cc3	RC-2-32	66553062
245	Clc(c1)c([N+]([O-])=O)cc(C(=O)N)c1NCc2cncnc2	KVR-1-126	57519666
246	COc(c1)c([N+]([O-])=O)cc(C(=O)N)c1NCc2cccnc2	KVR-1-124	57519665
247	Fc(c1)ccc(O)c1-c2nc(N)nc(n2)N	JWS-6-76	135566557
248	Oc(c1)ccc(O)c1-c2nc(N)nc(n2)N	JWS-6-52	135566556
249	CCCNc(nc1N)sc1[C@H](O)c2ccncc2	RC-1-136	66553056
250	O=S(=O)(N)c(cc1)ccc1Nc2sc(c(n2)N)C(=O)Nc3c(F)cccc3F	RC-2-142	66553058
251	O=S(=O)(N)c(cc1)ccc1Nc2sc(c(n2)N)C(=O)Nc3cc(F)ccc3	RC-2-135	66553057
252	O=S(=O)(N)c(cc1)ccc1Nc2sc(c(n2)N)C(=O)Nc3cc(F)cc(F)c3	RC-2-143	66553060
253	O=S(=O)(N)c(cc1)ccc1CNc2c(C(=O)N)cc([N+]([O-])=O)cc2	KVR-1-84	57519664
254	c1ccc([N+]([O-])=O)cc1[C@@H](O)c(c(n2)N)sc2NC3CCCCC3	RC-2-21	66553059
255	C1COCCN1c2c([N+]([O-])=O)cc(C(=O)N)c(c2)NCc3cnc(N)nc3	KVR-2-88	57519675
256	OC[C@@H](C)Nc1nc(ncc1Br)Nc2ccc(S(=O)(=O)N)cc2	3I6	58890996
257	c1cc(F)ccc1C(=O)O	1Y6	9973
258	Clc1ccc(Cl)c(c12)[nH]cc2C#CCO	MFZ	102006364
259	c1csc(n12)nc(Cl)c2S(=O)(=O)N3C[C@H](CCC(=O)O)Oc(c34)ccc(c4)NC(=O)OC(C(F)(F)F)(C)C	6AF	118191641
260	C1CC1[S@@](=O)(=N)c2ccc(cc2)Nc3nc(c(cn3)C(F)(F)F)O[C@H](C)[C@H](O)C	Roniciclib	45380979
261	O=S(=O)(N)c(cc1)ccc1Nc(ncc2)nc2N[C@H](C)[C@H](O)C	6AE	118987243
262	CN(C)CCNS(=O)(=O)c1ccc(cc1)-c2nc(c(N)nc2)C(=O)Nc3cccnc3	7YG	56962315
263	C1CCC[C@@H](CCO)N1c(nc(n23)c(cn2)CC)cc3NCc(c[n+]4[O-])ccc4	Dinaciclib	46926350
264	O[C@H](C)[C@H](CC)Nc(n1)nc(c(c12)ncn2C(C)C)NCc3cccnc3	CCT068127	9842276
265	C1CC(OC)CCN1c2nc(ccn2)Nc(c3)ncc(c34)ccn4C5CCCC5	3QS	86278565
266	Clc1ncnc(c12)nc[nH]2	ES4	5359277
267	C1COCCN1Cc2cc(=O)oc(c23)cc(O)cc3	Oxazorone	5490061
268	c1nccn1-c([nH]2)nc(c23)cccc3	5JE	17993508
269	COc1ncnc(c12)nc[nH]2	SZL	70632
270	c1ccsc1C(=O)Nc2ncnc(c23)nc[nH]3	ZXC	182483
271	O=C1NC(=O)[C@H](C(=O)N)C(=O)N1c2ccccc2	RJI	118987003
272	O=S(=O)(N)c(cc1)ccc1Nc(nc2N)sc2C(=O)c3c([N+]([O-])=O)cccc3	RC-3-89	66553053
273	c1cccc(Cl)c1Nc2nc(ncc2)Nc3ccc(cc3)C(=O)O	YL5-083	56587959
274	OC(=O)c(cc1)ccc1Nc(ncc2)nc2Nc3ccccc3	YL1-038-31	56587958
275	NCC1(CC1)C(=O)NCCCNc2c(Br)cnc(c23)nc([nH]3)-c4ccc(OC)cc4	1N3	70689447
276	c1cccc(c12)ccc(O)c2\C=N\c3ccc(O)cc3	NSC 111848	269970
277	O=c([nH]1)c(Cl)nc(c12)cccc2	NSC 35676	302705
278	NNC(=O)c1n[nH]c(c12)CC[C@H](C2)CCC	NSK-MC1-6	57519678
279	NNC(=O)c1n[nH]c(c12)cccc2	Z19	2727853
280	NNC(=O)c1n[nH]c(c12)CC[C@H](C2)C(C)(C)C	Z30	57519677
281	Clc(c1)c([N+]([O-])=O)cc(C(=O)N)c1NCc2cnc(Cl)nc2	KVR-1-150	57519662
282	Clc(c1)c([N+]([O-])=O)cc(C(=O)N)c1NCc2cnc(N)nc2	KVR-1-142	57519661
283	C=CCNc(nc1N)sc1C(=O)c2cc([N+]([O-])=O)ccc2	RC-1-135	4343210
284	C=CCNc(nc1N)sc1C(=O)c(c2)ccc(c23)cccc3	RC-1-132	71662060
285	Clc(c1)c([N+]([O-])=O)cc(C(=O)N)c1NCc2cccnc2	KVR-1-78	25161461
286	OCCNc(c1)c([N+]([O-])=O)cc(C(=O)N)c1NCc2cnc(N)nc2	KVR-1-190	57519663
287	OCCCNc1cc(c(C(=O)N)cc1[N+]([O-])=O)NCc2cccnc2	KVR-1-158	57519671
288	[O-][N+](=O)c(cc1)cc(C(=O)N)c1NCc2nccnc2	KVR-1-67	25161453
289	[O-][N+](=O)c(cc1)cc(C(=O)N)c1NCc2ccc(cc2)C(=O)O	KVR-1-74	25161448
290	[O-][N+](=O)c(cc1)cc(C(=O)N)c1NCc2ncccc2	KVR-1-9	25161454
291	[O-][N+](=O)c(cc1)cc(C(=O)N)c1NCc2ccc(cc2)CN	KVR-1-75	57519674
292	C1CC(N)CCN1c2c([N+]([O-])=O)cc(C(=O)N)c(c2)NCc3cnc(N)nc3	KVR-2-92	57519676
293	O=S(=O)(N)c(cc1)ccc1Nc2sc(c(n2)N)C(=O)c3cc(F)ccc3	RC-2-36	66553051
294	O=S(=O)(N)c(cc1)ccc1Nc(nc2N)sc2C(=O)c3cc([N+]([O-])=O)ccc3	RC-2-35	73347325
295	c1ncccc1C(=O)c2sc(nc2N)Nc3ccccc3	RC-2-13	59974568
296	NCCCNc1cc(c(C(=O)N)cc1[N+]([O-])=O)NCc2cccnc2	KVR-1-164	57519673
297	COCCCNc1cc(c(C(=O)N)cc1[N+]([O-])=O)NCc2cccnc2	KVR-1-162	57519672
298	O=S(=O)(N)c(cc1)ccc1C(=O)c2sc(nc2N)Nc3ccc(S(=O)(=O)N)cc3	RC-2-132	66553048
299	c1ccccc1Nc(nc2N)sc2C(=O)c3cc(OC)ccc3	RC-2-12	44250180
300	c1ccccc1Nc(nc2N)sc2C(=O)c3ccccc3	RC-1-148	936046
301	O=S(=O)(N)c(cc1)ccc1Nc2sc(c(n2)N)C(=O)c3cccnc3	RC-1-137	66553052
302	CNC(=O)c1n[nH]c(c12)CC[C@@H](C2)C(C)(C)CC	NSK-MC1-12	57519660
303	O=S(=O)(N)c(cc1)ccc1CNC(=O)c2n[nH]c(c23)CC[C@H](C3)C(C)(C)CC	NSK-MC2-55	57519659
304	c1cccc(C(=O)N)c1NCc2cccnc2	KVR-1-134	57519669
305	Clc(c1)c([N+]([O-])=O)cc(C(=O)N)c1NCc2cc(F)c(F)c(F)c2	KVR-1-140	57519670
306	c1nc(Cl)ccc1CNc2c(C(=O)N)cc([N+]([O-])=O)cc2	KVR-1-127	57519668
307	c1cccc(O)c1-c2nc(N)nc(n2)N	X11	97600
308	Clc(c1)ccc(O)c1-c2nc(nc(n2)N)Nc3ccccc3	X0A	3445006
309	Clc(c1)ccc(O)c1-c2nc(N)nc(n2)N	X06	3290859
310	[O-][N+](=O)c(cc1)cc(C(=O)N)c1NCc2cccnc2	X07	2906793
311	NNC(=O)c1n[nH]c(c12)CC[C@H](C2)C(C)(C)CC	X03	853380
312	C=CCNc(nc1N)sc1C(=O)c2ccccc2	X02	1598420
313	Clc(c1)c([N+]([O-])=O)cc(C(=O)N)c1NCc2ccc(Cl)nc2	KVR-1-102	57519667
314	N#Cc(c1)ccc(O)c1-c2nc(N)ncn2	JWS-6-260	135566553
315	c1ccc(Cl)cc1-c(c2)ccc(c23)nc(cc3C(=O)O)C(=O)N[C@H](C(=O)OC)Cc4ccc(O)cc4	2KD	16050817
316	CC(C)(C)c1oc(nc1)CSc(cn2)sc2NC(=O)[C@@H](C)c3ccccc3	1YG	5329689
317	CCOc(cc1)ccc1Nc2c(C)c(nc(n23)ccn3)N[C@H]4CCCNC4	PDY	49867482
318	OC(=O)[C@@H]1N=C(SC1)c(s2)nc(c23)ccc(O)c3	Luciferin	92934
319	OC(=O)[C@@H]1N=C(SC1)c(cc2)nc(c23)c(O)ccc3	WG8	136078457
320	CN(C)CCCOc1ccc(nc1)Nc(c2)ncnc2-n3cnc(c34)cccc4	D6I	76871873
321	Brc(c1)[nH]c(c12)C(=O)NCC/C2=C3/N=C(N)NC3=O	HYMENIALDISINE	135413546
322	COc(c1)c(OC)cc(c12)ncnc2Nc3cc(O)ccc3	JANEX 3	5687
323	n1cn(C)c(c12)nc(NCCO)nc2NCc3ccccc3	Olomoucine	4592
324	C1CCCCC1COc2nc(nc(c23)nc[nH]3)Nc4ccc(cc4)C(=O)N(CC)CC	NU-6140	10202471
325	OCCN(CCO)c(n1)nc(c(c12)ncn2C(C)C)NCc3ccc(OC)cc3	CVT-313	6918386
326	CC(C)(C)c1oc(nc1)CSc(cn2)sc2NC(=O)C3CCNCC3	BMS-387032	3025986
327	Clc(c1)ccc(Cl)c1Nc(ccn2)nc2Nc(cc3)ccc3OC[C@@H](O)CN(C)C	FBL	445953
328	Clc(c1)ccc(Cl)c1Nc(ccn2)nc2Nc(cc3)ccc3OC[C@H](O)CN(C)C	FAL	445952
329	c1ccc(Cl)cc1Nc(c(c23)ncn3CC)nc(n2)N[C@H]4[C@@H](N)CCCC4	CGP74514A	2794188
330	SCCC(=O)N1CCCc(c12)cc(cc2)C(=O)OC	AEQ	355051027
331	CC(C)(C)OC(=O)N1CCN(C(=O)CC)c(c12)cccc2	AAK	135388272
332	CCN1CCN(C(=O)CC)c(c12)cccc2	9ZB	137348879
333	CC(C)(C)c1ccc(cc1)CCC(=O)Nc2ccc(cc2)-c3ncccn3	9Z2	11851958
334	c1cccc(c12)N(C(=O)OC)CCN2C(=O)CC	9YZ	137348876
335	O=C(N)c1ccc(cc1)-c2ccc(cc2)-c(n3)cc(n(c34)ncc4Br)NCc5cccnc5	6ZK	381324330
336	O=S(=O)(C)c1ccc(cc1)Nc(ncc2)nc2-c(n3C(C)C)cnc3C	AZD5438	16747683
337	C1C(C)CC(OC)C(O)C(C)/C=C(C)/C(OC(=O)N)C(OC)/C=C\C=C(C)\C(=O)NC(C2=O)=C(C(=O)C(=C12)OC)c3ccccc3	814	139033401
338	c1ccoc1-c(c23)c(O)c(OC)c(c3O)C[C@@H](C)C[C@H](OC)[C@H](O)/C(C)=C/[C@H](C)[C@@H](OC(=O)N)[C@@H](OC)/C=C\C=C(C)\C(=O)N2	62U	162023711
339	C1C(C)CC(OC)C(O)C(C)/C=C(C)/C(OC(=O)N)C(OC)/C=C/C=C(C)\C(=O)NC(C2=O)=C(C)C(=O)C(=C12)OC	4QS	139033263
340	CN(C)CCNc(c12)c(O)c(C)c(c1O)NC(=O)/C(C)=C/C=C/[C@H](OC)[C@H](OC(=O)N)/C(C)=C/[C@@H](C)[C@@H](O)[C@@H](OC)C[C@@H](C2)C	8TO	162023710
341	C1C(C)CC(OC)C(O)C(C)/C=C(C)/C(OC(=O)N)C(OC)/C=C/C=C(C)\C(=O)NC(C2=O)=C(C)C(=O)C(=C12)NCC=C	59C	139033325
342	Clc1c(O)cc(O)c(c12)C(=O)NCC\C=C\CCC[C@H](C(=O)C2)C(=O)NCc3ccccc3	13N	53488397
343	Clc1c(O)cc(O)c(c12)C(=O)NCC\C=C\CCC[C@@H](C(=O)C2)[C@H](O)OCC	13I	139033266
344	Clc1c(O)cc(O)c(c12)C(=O)NCC\C=C\CCCCC(=O)C2	13C	53488395
345	Clc1c(O)cc(O)c(c12)C(=O)OCC\C=C(C=O)\CCCCC(=O)C2	XD6	49867852
346	Clc1c(O)cc(O)c(c12)C(=O)N(C)CCC/C=C\CCCC(=O)C2	L4V	117071767
347	Clc1c(O)cc(O)c(c12)C(=O)N(C)CC\C=C\CCCCCC(=O)C2	BO5	74538847
348	Clc1c(O)cc(O)c(c12)C(=O)N(C)CC\C=C\CCCCCCC(=O)C2	7FK	72710569
349	Clc1c(O)cc(O)c(C(=O)OC)c1CCC(=O)Nc2c(O)cc(OC)c(O)c2	RDA	11373270
350	Clc1c(O)cc(O)c(c12)C(=O)OCC\C=C\CCCCCC(=O)C2	M1S	11987878
351	Clc1c(O)cc(O)c(c12)C(=O)OCC/C=C\CCCC(=O)C2	NP4	11963551
352	Clc1c(O)cc(O)c(c12)C(=O)OCC\C=C\CCCC(=O)C2	NP5	11963552
353	Clc1c(O)cc(O)c(c12)C(=O)OCC\C=C\CCCCC(=O)C2	P2N	24916788
354	Clc(c1)c(O)cc(O)c1-c([nH]nc2)c2-c3ccc(cc3)OCCCN	KJ2	5288672
355	Clc(c1)c(O)cc(O)c1C(=O)OCCc2c(OC)c(N)cc(OC)c2OC	RDE	11840979
356	C1C(C)(C)CC(=O)c(c12)c(C(F)(F)F)nn2-c(ccc3C(=O)N)cc3N[C@H]4CC[C@@H](CC4)OC(=O)CN	SNX-5422	44195571
357	O1COc(c12)cc(N(C)C)c(c2)Sc(nc(c34)c(N)ncc4)n3CCNCC(C)(C)C	Debio 0932	44156921
358	O1COc(c12)cc(Br)c(c2)Sc(nc(c34)c(N)ncn4)n3CCC(CC5)CCN5C(=O)[C@H](C)OC(=O)[C@@H](N)C	MPC-0767	70674083
359	O1COc(c12)cc(Br)c(c2)Sc(nc(c34)c(N)ncn4)n3CCC(CC5)CCN5C(=O)[C@@H](O)C	MPC-­3100	57336747
360	OC(C)(C)CC#Cc(c(c12)c(Cl)nc(n2)N)cn1Cc3ncc(C)c(OC)c3C	EC144	11517212
361	C1COCCN1CCOc(cc2)c(OC)cc2C(=O)c3c(O)cc(O)c(CC)c3CC(=O)N(CCOC)CCOC	KW-2478	23116322
362	CO[C@@H]1[C@@H](C)C[C@H](OC)[C@H](OC)[C@@H](C)/C=C(C)/[C@H](OC(=O)N)[C@@H](C)/C=C/C=C(C)\C(=O)NC(C2=O)=CC(=O)C=C12	Macbecin	10886216
363	CC[C@@]1(O)C(=O)OCc(c2=O)c1cc(n23)c4c(C3)c(CC)c5c(n4)ccc(c5)OC(=O)N6CCC(CC6)CCn7ccc(c78)cc(cc8)-n9c(n[nH]c9=O)-c1cc(C(C)C)c(O)cc1O	PEN-866	135564925
364	O=C(N)c(cc1)cc(CC)c1-n(nc2C(C)C)c(c23)nccc3-n4cc(nc4)-c(c5)cnn5C	TAS-116	67501411
365	CC[C@@H](C)Nc(c1)c(C(=O)N)cc(C)c1C(=O)N[C@@H](C2)C[C@@H](CC3)N([C@H]23)c4ncc(cc4)C(=O)C5CC5	XL888	57748689
366	C1[C@@H](C)C[C@H](OC)[C@H](O)[C@@H](C)/C=C(C)\[C@H](OC(=O)N)[C@@H](OC)/C=C\C=C(C)/C(=O)Nc(c2O)cc(O)c(c12)NCC=C	Retaspimycin	11534420
367	C1[C@@H](C)C[C@H](OC)[C@H](O)[C@@H](C)/C=C(C)\[C@H](OC(=O)N)[C@@H](OC)/C=C/C=C(C)\C(=O)NC(C2=O)=CC(=O)C(=C12)NCCN(C)C	Alvespimycin	5288674
368	C1[C@@H](C)C[C@H](OC)[C@H](O)[C@@H](C)/C=C(C)\[C@H](OC(=O)N)[C@@H](OC)/C=C/C=C(C)\C(=O)NC(C2=O)=CC(=O)C(=C12)NCC=C	Tanespimycin	6505803
369	O1COc(c12)cc(I)c(c2)Cc(nc(c34)c(N)nc(F)n4)n3CCCNC(C)C	DZ8	11562562
370	COc(c1)c(OC)c(OC)cc1Cc(n2CCCC)nc(c23)c(N)ncn3	PU3	448965
371	c1cc(OC)ccc1Cc(n2CCCC)nc(c23)c(N)ncn3	PU4	5289227
372	c1ccc(OC)cc1Cc(n2C/C=C\C)nc(c23)c(N)ncn3	PU5	5289228
373	O1COc(c12)ccc(c2)Cc(n3CCCC)nc(c34)c(N)ncn4	PU6	448968
374	COc(c1)c(OC)c(OC)c(Cl)c1Cc(nc(c23)c(N)ncn3)n2CCCC#C	PU9	448971
375	Nc1nc(F)nc(c12)nc([nH]2)Cc3c(OC)ccc(c3)OC	PU2	448973
376	Fc(n1)nc(N)c(c12)nc(n2CCCC)Cc3c(OC)ccc(c3)OC	PU0	448974
377	Fc(n1)nc(N)c(c12)nc(n2CCCC#C)Cc3c(OC)ccc(c3)OC	PUZ	5289232
378	Fc(n1)nc(N)c(c12)nc(n2CCCC)Cc(c3)ccc(c34)OCO4	PUX	448976
379	Oc1cc(O)c(CC)cc1-c2[nH]ncc2-c3[nH]cnc3	43P	656975
380	O1COc(c12)ccc(c2)-c3c(n[nH]c3C(=O)O)-c4cc(CC)c(O)cc4O	4BC	656974
381	Clc(c1)c(O)cc(O)c1C(=O)N([C@H]2C(=O)NCC)Cc(c23)cccc3	1RC	44608014
382	Clc(c1)c(O)cc(O)c1C(=O)N2[C@H](CCC2)c3c(C)cccc3	4CD	44608013
383	O1COc(c12)cc(I)c(c2)Sc(nc(c34)c(N)ncn4)n3C[C@@H](CCC5)CN5Cc6cc(S(F)(=O)=O)ccc6	Q2A	145925617
384	O1COc(c12)cc(I)c(c2)Sc(nc(c34)c(N)ncn4)n3C[C@H](CCC5)CN5Cc6cc(S(F)(=O)=O)ccc6	Q2D	145925615
385	Clc(c1)c(O)cc(O)c1-c2noc(NC(=O)C(C)(C)C)c2-c3ccc(OC)cc3	8CR	135567372
386	Brc(c1)c(O)cc(O)c1-c(noc2NC(=O)C)c2-c3ccc(OC)cc3	8CU	135567373
387	c1cc(OC)ccc1-c2c(NC(=O)C)onc2-c(c(O)cc3O)cc3-c4ccc(C)c(c45)nccc5	JX1	135567375
388	Oc1cc(O)c(cc1C(C)C)-c2[nH]nc(NC(=O)C)c2-c3ccc(OC)cc3	9ZC	138376562
389	c1cc(OC)ccc1-c2c(-c3c(O)cc(O)c(Cl)c3)noc2NC(=O)C4CC4	8DU	135567374
390	CCC(=O)Nc1onc(-c2c(O)cc(O)c(Cl)c2)c1-c3ccc(OC)cc3	8CF	135567370
391	c1cc(OC)ccc1-c2c(-c3c(O)cc(O)c(Cl)c3)noc2NC(=O)C(C)C	8CO	135567371
392	O=C(N)c(cc1)cc(C)c1-n(nc2C(C)C)c(c23)nccc3-n4cc(nc4)-c(c5)cnn5C	9J0	67501021
393	FC(F)(F)[C@@H]1CCN(c(n12)ccn2)C(=O)c3c(O)cc(O)cc3	7FX	124201643
394	c1cc(O)cc(O)c1C(=O)N(CC(=O)NCC)c2ccc(OC)cc2	7F9	329727761
395	C1C(C)(C)CC(=O)c(c12)c(C)cn2-c3cc(c(cc3)C(=O)N)NC4CCC(=O)CC4	73Z	11853914
396	Clc1cnc(N)nc1C(=O)N[C@@H]2c(cccc3)c3c(c24)c(ccc4)-c([nH]5)nc(c56)ccnc6	73S	91003323
397	[nH]1cnc(c12)ncc(Br)c2C(=O)N[C@@H]3c(cccc4)c4c(c35)c(ccc5)-c(c6)cnc(c67)cccc7	73Y	129900094
398	Cc1c(Cl)c(C)cnc1Cn2ccc(c23)c(Cl)nc(n3)N	72Y	11324720
399	Fc(c1)ccc(c12)[nH]c(n2)-c3cccc(c34)[C@@H](c5c4cccc5)NC(=O)c6ccnc(c67)[nH]cc7	73J	341098212
400	C1C[C@H](O)CC[C@@H]1Nc2cc(ccc2C(=O)N)-n3nc(C)c(c34)c(ccc4)-c(c5)cnc(c56)cccc6	72K	162169633
401	C1COCCN1c2ccc(cc2)N(C)C(=O)c(c3)c(O)cc(c34)[nH]nc4C(=O)N5CCCCC5	70K	135567214
402	CCCCN(C)C(=O)c1n[nH]c(c12)cc(O)c(c2)C(=O)N(C)c3ccc(cc3)N4CCOCC4	70Z	348355504
403	CC(C)(C)CCc1n[nH]c(c12)cc(O)c(c2)C(=O)N(C)c3ccc(cc3)C(CC4)CCN4C	70O	348355508
404	N#Cc(c1)c(O)cc(c12)[nH]cc2CCCCN3CCN(CC3)c4ccc(C#N)cc4	70M	131801398
405	C1CN(C)CCN1S(=O)(=O)c2c(cc(F)c(F)c2)-c(c3)ccc(c34)nc(N)nc4C(=O)N(C5)Cc(c56)cccc6	70N	58457238
406	CCNC(=O)C1(CCC1)c(c2)ccc(c23)nc(N)nc3C(=O)N(C4)Cc(c45)cccc5	70L	52938818
407	c1ccc(OC)nc1-c(cc(F)cc2)c2[C@@H](C3)NC(=O)c(c34)c(C)nc(n4)N	NVP-HSP990	46216556
408	n1c(N)nc(C)c(c12)C(=O)C[C@H](C2)c3ccccc3	3JC	792933
409	O=C(N)c(c1)c(Cl)cc2c1N(Cc3occc3)CCc4c(C)c(c5n24)C(=O)CC(C5)(C)C	40Z	90657119
410	O=C(N)c(c1)c(Cl)cc2c1O[C@@H](CCC)Cc3c(C)c(c4n23)C(=O)CC(C4)(C)C	40X	90657118
411	O=C(N)c(c1)ccc2c1OCCc3c(C)c(c4n23)C(=O)CC(C4)(C)C	40Y	90657117
412	C1C(C)(C)CC(=O)c(c12)c(C)cn2-c3ccc(cc3)C(=O)N	40W	11855206
413	C1C[C@H](O)CC[C@H]1Nc2c(C(=O)N)ccc(c2)-c3nccc(c34)c(ccc4)-n5cc(nc5)-c6ccccc6	YUK	90642930
414	C1OCc2cccc3c(c(Cl)cc1c23)-c4nc(nc(n4)N)SCCCC(=O)N	WHA	25066238
415	c1ncccc1-c(cc(F)cc2)c2[C@@H](C3)C/C(=N\O)c(c34)c(C)nc(n4)N	MOJ	46937132
416	C1SCCc(c12)nc(N)nc2C	MO8	2726820
417	c12c(C)cc(C)c(c1)c3nc(N)nc(c3)SCCC(=O)NCCCNC2=O	VHE	49784851
418	c12c(C)cc(C)c(c1)c3nc(N)nc(c3)Sc4cc(ccc4)OCCCNC2=O	VHC	25177719
419	c12c3nc(N)nc(c3)Sc4cc(ccc4)OCCCCOc(c2)ccc1C	VHA	57383471
420	Cc1nc(SC)nc(n1)N	ZZ3	214051
421	COCCOc1nc(N)nc(c1)C	ZZ2	3777900
422	C1CCCN1CCOc2cc(c(Cl)cc2Cl)-c3nc(N)nc(c34)sc(c4)C(=O)NCC	2KL	25210273
423	O=C(N)c(c1N)sc(c12)nc(N)c(C#N)c2-c3ccc(cc3)OCC	ZZ5	1916699
424	c1cc(Cl)cc(Cl)c1-c2nc(N)ncc2/N=N/c3ccccc3	ZZ4	3695754
425	CN(C)c1ncnc(c12)nc[nH]2	42C	3134
426	c1ccoc1-c(n[nH]c2C)c2C(=O)OC	37D	2743394
427	c1ccoc1-c2n[nH]c(C)c2CCCCN(C)c3ncnc(c34)nc[nH]4	Z64	46238526
428	Oc1cc(O)c(cc1C(C)C)-c(n[nH]c2=S)n2-c3ccc(cc3)CNC(=O)OCC	819	135566474
429	C1C(C)(C)CC(=O)c(c12)c(C)cn2-c(c3)cc(CC(C)C)c(c34)C(=O)NCC4	2R6	73437615
430	C1C(C)(C)CC(=O)c(c12)c3c(CN(C)CC3)n2-c(c4)cc(CC(C)C)c(c45)C(=O)NCC5	FGH	90654657
431	C1C(C)(C)CC(=O)c(c12)c3c(CN(C)CC3)n2-c(c4)cc(NC(C)C)c(c45)C(=O)NCC5	2Q9	90654652
432	C1C(C)(C)CC(=O)c(c12)c(C)cn2-c(cc(c34)CCNC4=O)cc3C5CCCC5	2QA	73437616
433	C1C(C)(C)CC(=O)c(c12)c3c(CN(C)CC3)n2-c4ccc(cc4)C(=O)N	2Q8	90654665
434	C1OCC[C@@H]1Nc(c(c(F)c2)C(=O)N)cc2-n3cc(C)c(c34)C(=O)CC(C4)(C)C	2LC	67495834
435	C1CCCN1C(=O)c2n[nH]c(c23)cc(O)c(c3)C(=O)N(C)c4ccc(cc4)N5CCOCC5	9EK	363591557
436	C1CC[C@H](OC)CN1C(=O)c2n[nH]c(c23)cc(O)c(c3)C(=O)N(C)c(cc4)ccc4N5CCOCC5	9RZ	135567255
437	C1COCCN1c2ccc(cc2)N(C)C(=O)c(c3)c(O)cc(c34)n[nH]c4Cc5cc(C)ccc5	9R8	135567254
438	C1CN(C)CCN1S(=O)(=O)c2c(cccc2)-c(c3)ccc(c34)nc(N)nc4C(=O)N(C5)Cc(c56)cccc6	H0T	59483528
439	c1cccc(Cl)c1-c2nc(N)nc(n2)N	4ER	97399
440	Clc(c1)c(O)cc(O)c1-n2c(=O)[nH]c(c23)cc(cc3)CNS(=O)(=O)c4cccnc4	4EQ	312523832
441	Oc1cc(O)c(CCC)cc1-n2c(=O)[nH]c(c23)cccc3	4EP	69440884
442	Oc1cc(O)c(CC)cc1-n2c(=O)[nH]c(c23)cccc3	4EO	118796334
443	c1cc(O)cc(O)c1C(=O)c2cc(O)ccc2	4EV	22466004
444	c1cc(O)cc(O)c1C(=O)c2ccc(O)cc2	4EU	73852
445	Clc(c1)ccc(O)c1C(=O)c2ccc(O)cc2	4ET	14568206
446	[O-][N+](=O)c(cc1)cc(Cl)c1-c2nc(N)nc(c2)C	4ES	118796336
447	C1C[C@@H](O)CC[C@H]1Nc(c(cc2)C(=O)N)cc2-n3cc(C)c(c34)C(=O)CC(C4)(C)C	74E	11853909
448	c1cc(O)cc(O)c1C(=O)N(C2)Cc(c23)cccc3	PFT	11955507
449	C1CCCCN1C(=O)CO/N=C(/C2)\C=C\CC/C=C/CCOC(=O)c(c23)c(O)cc(O)c3	JZC	24898235
450	Clc1c(O)cc(O)c(c12)C(=O)OCC\C=C\CC/C=C/C(/C2)=N\OCC(=O)N3CCCCC3	JZB	24823146
451	Clc(c1)c(O)cc(O)c1C(=O)N2[C@H](CCC2)c3ccc(cc3)CN(CC4(F)F)CC4	BD0	44216743
452	Oc1cc(O)c(cc1C(C)C)-c(n[nH]c2=O)n2-c(cc3)cc(c34)ccn4C	Ganetespib	135564985
453	c1cnc(N)cc1C(=O)N[C@@H]2c(cccc3)c3c(c24)c(ccc4)-c([nH]5)nc(c56)ccnc6	YKJ	53389266
454	c1c[nH]c(c12)nccc2C(=O)N[C@@H]3c(cccc4)c4c(c35)c(ccc5)-c([nH]6)nc(c67)ccnc7	YKI	53389265
455	c1ccnc(c12)cccc2C(=O)NC(=c(c3=C45)cccc3)C5=CC=C[C@@H]4c([nH]6)nc(c67)ccnc7	YKE	137350193
456	c1cccc(c1c23)C(=O)c2cccc3-c([nH]4)nc(c45)ccnc5	YK9	53393801
457	c1cccc(c2O)c1c(n23)/C(CCC3)=C(\N=4)N=c(c45)cncc5	YJX	136360144
458	c1cc(O)cc(O)c1-c(noc2C)c2-c3ccccc3	YJW	135566391
459	c1cnccc1C(=O)N[C@@H]2c(cccc3)c3c(c24)c(ccc4)-c([nH]5)nc(c56)ccnc6	YKC	53389264
460	O=C(N)CCC(=O)N[C@@H]1c(cccc2)c2c(c13)c(ccc3)-c([nH]4)nc(c45)ccnc5	YKB	53389263
461	Clc(c1)c(O)cc(O)c1-c2nnsc2-c3ccc(OC)cc3	YI0	44468395
462	Clc(c1)c(O)cc(O)c1-c2nnsc2-c3ccc(cc3)OCC	BZ8	44590680
463	CCOc(cc1)ccc1-c2snnc2-c3cc(CC)c(O)cc3O	6QM	44590709
464	Clc(c1)c(O)cc(O)c1-c2nnsc2-c3cc(OC)c(OC)cc3	YI5	44468397
465	CCn1cnc(c12)c(N)ncn2	2EC	7
466	c1cc(O)cc(c12)n[nH]c2C	XQ0	135566389
467	Oc(c1)ccc(c12)cn[nH]2	2K4	135483987
468	COCCCNc1ncnc(c12)nc[nH]2	2KU	2155044
469	CSc1ncnc(c12)nc[nH]2	XQG	5778
470	COc1cc(O)cc(O)c1	2A7	71648
471	CCC(=O)c1c(O)cc(O)cc1	2FY	79856
472	c1cc(O)c(OC)cc1C(=O)OC	VXX	19844
473	COC(=O)Cc1cc(O)cc(O)c1	XQI	579787
474	c1ccsc1S(=O)(=O)Nc(ccc2O)cc2-c3c(O)ccc(c34)cccc4	2D4	1079383
475	c1cnoc1-c2n[nH]c(C)c2C(=O)OC	2D3	2744660
476	n1nc(SC)sc1Sc2c(C)[nH]nc2C	2GA	2746066
477	Clc1cc(Cl)c(OC)cc1-c2nc(C)nc(c23)[nH]c(C)c3C#N	3RR	52940060
478	Clc1cc(Cl)c(OC)cc1-c2nc(C)nc(c23)[nH]cc3C#N	3RQ	52940059
479	Clc1cc(Cl)c(OC)cc1-c2nc(N)nc(c2)C	3RP	52940058
480	C1C(C)(C)CC(=O)c(c1n23)c(C)c2CCN(C(=O)[C@@H](N)C)C[C@@H](C)[C@H](C)Nc4cc3ccc4C(=O)N	06T	53245660
481	C1C(C)(C)CC(=O)c(c1n23)c(C)c2CCCN(C)C(=O)[C@H](C)Nc4cc3ccc4C(=O)N	06H	53318895
482	C1CCc2c(C)c(C(=O)CC(C3)(C)C)c3n2c(ccc4C(=O)N)cc4NC[C@H](N15)CCC5	06J	53326941
483	n1c(N)nc(Cl)c(c12)ncn2Cc3ncc(C)c(OC)c3C	BIIB021	16736529
484	C1C(C)(C)CC(=O)c(c1n23)c(C)c2CCCNC[C@H](C)Nc4cc3ccc4C(=O)N	05S	53259029
485	c1ccnn1CCOc(cc(Cl)cc2Cl)c2-c3nc(N)nc(c34)CN(C4)C(=O)NCC(F)(F)C	FU7	25003030
486	FC(F)(F)CCCOc(cc(Cl)cc1Cl)c1-c2nc(N)nc(c23)CN(C3)C(=O)NC4CCC4	FU3	53239502
487	c1c(C)nc(N)nc1-c(c(Cl)ccc2)c2OCCCC(F)(F)F	FU5	51049656
488	CSc(n1)nc(N)nc1-c(c(Cl)cc2c34)c4cccc3COC2	B2X	49784944
489	C1OCc2cccc3c(ccc1c23)-c4nc(N)nc(c4)C	B2L	21846414
490	c1c(C)nc(N)nc1S(=O)(=O)c2ccc(C)cc2	B2K	2766290
491	CC1(C)CNc(c12)cc(O)c(c2)C(=O)N(C3)Cc(c34)cccc4	L81	46840160
492	c1cccc(c12)CN(C2)C(=O)c3cc(C(C)C)c(OC)cc3O	XJG	11955555
493	Oc1ccc(cc1C(C)(C)C)C(=O)N(C2)Cc(c23)cccc3	T5M	11955465
494	C1COCCN1C(=O)c(cc2C(C)(C)C)ccc2O	C0Y	46861554
495	Clc(c1)nc(N)nc1-c(c(Cl)cc2Cl)cc2OCCN3CCOCC3	C0P	46861553
496	CCN(CC)C(=O)c1cc(OC)c(O)cc1	Ethamivan	9363
497	c1cnc(N)nc1-c2cccnc2	XDK	12450582
498	Cc1nnc(Cl)c(c12)cccc2	MT0	269733
499	Clc(c1)nc(N)nc1-c2c(OC)cccc2	WOE	46861552
500	c1cccc(c12)CN(C2)C(=O)c3cc(C(C)C)c(O)cc3O	VHD	11849171
501	c1ccc(OC)c(C)c1C(=O)N[C@@H](C2)C[C@@H](CC3)N([C@H]23)c4ncc(cc4)C(=O)NCc5ccccc5	592	57748552
502	O=C(N)c(c(c1)C)cc(C)c1C(=O)N[C@@H](C2)C[C@@H](CC3)N([C@H]23)c4ncc(cc4)C(=O)NCc5ccccc5	99A	60147024
503	CC[C@@H](C)Nc(c1)c(C(=O)N)cc(C)c1C(=O)N[C@H](C2)C[C@H](CC3)N([C@@H]23)c4ncc(cc4)C(=O)C5CC5	Xl-888	60147023
504	CN1CCC(CC1)NC(=O)c2noc(c2)-c3c(cc(O)cc3O)Oc4ccc([N+]([O-])=O)cc4	NMS-E973	135566652
505	Oc(c1)cc(O)cc1Cc2nc(cccc3)c3c(n24)nc(n4)N	T62	69927927
506	COc(c1)cc(OC)cc1Cc2nc(cccc3)c3c(n24)nc(n4)N	6LV	67042932
507	OCCNc1cc(F)cc(c1c(n23)nc(n2)N)nc3Cc(c4)ccc(c45)OCO5	IK9	51035661
508	O1COc(c12)ccc(c2)Cc3nc(c4c(n35)nc(n5)N)cc(cc4)NCCO	G3R	50938552
509	Fc1cccc(c1c(n23)nc(n2)N)nc3Cc(c4)ccc(c45)OCO5	HAJ	51037112
510	n1c(N)nc(n12)c3c(cc(S(=O)(=O)N)cc3)nc2Cc(c4)ccc(c45)OCO5	W2D	51036678
511	O1COc(c12)ccc(c2)Cc3nc(cccc4)c4c(n35)nc(n5)N	TV2	68106001
512	n1c(N)nc(n12)c3c(cccc3)nc2CCC	H05	893376
513	[O-][N+](=O)c(cc1)ccc1Oc(cc(O)cc2O)c2-c3onc(c3)C(=O)NCC	XKL	135566656
514	Clc1cc(OC)c(OC)cc1-c2nc(SCC(=O)N(C)C)nc(c23)[nH]cc3C#N	0TM	25216602
515	N#Cc1c[nH]c(c12)nc(SC)nc2-c3c(C)cc(C)cc3	2N6	16738716
516	C1C(C)(C)CC(=O)c(c12)cc(C)n2-c3cc(c(cc3)C(=O)N)Nc4cc(OC)c(OC)c(c4)OC	SNX-1321	11856298
517	Oc1cc(O)c(cc1C(C)C)-c2noc(N)c2	FJ3	135566859
518	Clc(c1)c(O)cc(O)c1-c(noc2NC(=O)C)c2-c3ccc(OC)cc3	FJ2	135566858
519	C1CC1C(=O)Nc2onc(c2-c3ccc(OC)cc3)-c4cc(C(C)C)c(O)cc4O	FJ6	135566861
520	C1CC1C(=O)Nc2onc(-c3cc(C(C)C)c(O)cc3O)c2-c4ccc(cc4)CN5CCOCC5	FJ5	135566860
521	Clc(c1)c(O)cc(O)c1C(=O)Cc2ccc(OC)cc2	FJ4	11277788
522	Brc(c1)ccc(n12)nnc2-c(c(O)cc3O)cc3C(=O)N4CCN(C)CC4	RL3	136498886
523	c1cc(O)ccc1C(=O)N2CCN(C)CC2	S46	4740811
524	c1cccc(c12)CN(CC2)C(=O)c3cc(C(C)C)c(O)cc3O	S36	59263117
525	Brc(c1)ccc(n12)nnc2-c3c(O)cc(O)c(Cl)c3	X29	137350152
526	Brc(c1)ccc(n12)nnc2-c(c(O)cc3O)cc3C(=O)N(CC4)Cc(c45)cccc5	RL1	136498887
527	Oc1cc(O)cc(O)c1C(=O)n2cccc2	PYU	11160307
528	c1cc(O)cc(O)c1C(=O)N2[C@H](CCC2)c3c(C)cccc3	PY9	25058141
529	C1CCC(=O)c(c12)c3c(cccc3)n2-c4cc(c(cc4)C(=O)N)NCCOC	SNX	24812721
530	Clc(c1)c(O)cc(O)c1-c2noc(c23)ccc(c3)NCCN4CCOCC4	CXZ	135566415
531	Brc(c1)c(O)cc(O)c1-c2noc(c23)cc(O)cc3	BXZ	135433906
532	FC(F)(F)c(n[nH]1)c(c12)C(=O)CC(C2)(C)C	FJ1	44190463
533	c1ccccc1CN(C)C(=O)c(c2)c(O)cc(c23)n[nH]c3Cc4cc(C)ccc4	EFU	135566719
534	C1COCCN1C(=O)c2ccc(O)cc2	0OY	7586556
535	c1cc(O)cc(c12)n[nH]c2[C@H](C#N)CC3CCCCC3	EFT	135566718
536	c1cc(O)cc(c12)[nH]nc2-c3ccc(O)cc3	HH6	135566717
537	c1c(C)nc(N)nc1CNS(=O)(=O)c2cc(ccc2)N/C=C3\CCOC3=O	A94	17755582
538	O=C1OCC/C1=C\Nc2ccccc2	A51	44585557
539	O=c1occn1NCc2c(cccc2)C#Cc3nc(N)nc(c3)C	A91	24832022
540	c1cccc(c12)cc(Br)c(c2)-c3nc(N)nc(n3)N	A56	13373715
541	Clc(c1)c(O)cc(O)c1-c([nH]nc2)c2N3CCNCC3	4BH	135422922
542	CCNC(=O)c1[nH]nc(-c2c(O)cc(O)c(Cl)c2)c1N3CCNCC3	20	135431463
543	Clc(c1)c(O)cc(O)c1-c([nH]nc2)c2N(CC3)CCN3Cc4ccc(S(=O)(=O)C)cc4	2D9	135431462
544	O1COc(c12)cc(Br)c(c2)Sc(nc(c34)c(N)ncn4)n3CCCNC(C)C	PU-H64	6914564
545	O1COc(c12)cc(I)c(c2)Sc(nc(c34)c(N)ncn4)n3CCCNC(C)C	PU-H71	9549213
546	CCNC(=O)c1noc(-c2c(O)cc(O)c(Cl)c2)c1-c(cc3)ccc3CN4CCOCC4	2EQ	135525416
547	C1COCCN1Cc2ccc(cc2)-c3c(-c(cc4C(C)C)c(O)cc4O)onc3C(=O)NCC	Luminespib	135539077
548	CCNC(=O)c1noc(-c2c(O)cc(O)c(Cl)c2)c1-c3ccc(OC)cc3	VER-50589	135446210
549	CCNC(=O)c1[nH]nc(-c2c(O)cc(O)c(Cl)c2)c1-c3ccc(OC)cc3	VER-49009	4369536
550	Clc(c1)c(O)cc(O)c1-n2c(=O)[nH]c(c23)cc(cc3)CNS(=O)(=O)c4cccc(c45)cccc5	MEY	50925477
551	c1cccc(c12)[nH]c(=O)n2-c3c(O)cc(O)cc3	MEX	16727212
552	C1CC1C(=O)Nc2onc(c2-c3ccc(OC)cc3)-c4cc(c(O)cc4O)-c5cncc(c56)cccc6	FJS	135567062
553	O1COc(c12)cc(Br)c(c2)Cc(nc(n34)c(N)ncc4)c3NCc5ccccc5	JR9	137349606
554	Oc1cc(O)c(C(C)C)cc1C(=O)N(C2)CCc(c23)nc(nc3)OCC	6TN	124220253
555	c1cccc(Cl)c1-n2nccc2-c3c(O)cc(O)cc3	D4W	136382722
556	c1cc(Cl)ccc1CN(C)C(=O)c(c2)c(O)cc(c23)[nH]nc3Cc4ccccc4	C4T	374145051
557	c1cc(Cl)ccc1CN(C)C(=O)c(c2)c(O)cc(c23)[nH]nc3Cc4cc(C)ccc4	C4N	374145054
558	O1COc(c12)ccc(c2)N(C)C(=O)c(c3)c(O)cc(c34)[nH]nc4Cc5cc(C)ccc5	C4K	374145055
559	c1ccccc1-n2nccc2-c(c3)c(O)cc(c34)n[nH]c4Cc5ccccc5	C3Z	135567434
560	CC(C)N(C)S(=O)(=O)c1cc(c(O)cc1O)-c(n[nH]c2=O)n2-c3c(F)cccc3	6GV	135567175
561	c1cccc(F)c1-n2c(n[nH]c2=O)-c(c(O)cc3O)cc3C(=O)N(C)CCCC	6GC	135567174
562	c1cccc(F)c1-n2c(n[nH]c2=O)-c3c(O)cc(O)cc3	6G7	135509930
563	Brc(c1)c(O)cc(O)c1-c(n[nH]c2=O)n2-c3c(F)cccc3	6DL	135461028
564	c1cccc(F)c1-n2c(n[nH]c2=O)-c3cc(c(O)cc3O)C(=O)N(C)Cc4occc4	6FJ	135567164
565	CCCN(C)S(=O)(=O)c1cc(c(O)cc1O)-c(n[nH]c2=O)n2-c3c(F)cccc3	6FF	135567165
566	c1cccc(Cl)c1-n2nccc2-c(c(O)cc3O)cc3CCc4ncccc4	BA8	135567428
567	c1cc(O)cc(O)c1-c(n[nH]c2C)c2-c3ccc(OC)cc3	P4A	764764
568	COc(c1)c(OC)c(OC)c(Cl)c1Cc(nc(c23)c(N)nc(F)n3)n2CCCC#C	PU1	448972
569	c1cccc(c12)CN(C2)C(=O)c3nc(N)nc(c34)ccc(c4)-c5c(CNC)cccc5	B5Q	56943444
570	c1cc(O)cc(O)c1-c(n[nH]c2=S)n2-c3c(F)cccc3	G5E	135508238
571	COc(c1)c(OC)c(OC)cc1Cc(n2CCCC)nc(c23)c(N)ncn3	KFY	384641821
572	C1OC[C@H](OC)[C@H](OC)[C@@H](C)/C=C(C)/[C@H](OC(=O)N)[C@@H](OC(=O)N)CC/C=C(C)/C(=O)Nc(cc12)cc(c2)OC	Valerjesomycin	71299349
573	O1CCOc(c12)ccc(c2)-c3c(n[nH]c3C)-c4cc(CC)c(O)cc4O	CT5	984170
574	O[C@@H]1[C@@H](CO)O[C@H]([C@@H]1OC)n2cnc(c23)c(=O)[nH][nH]c3=O	HMC-HO4	492555
575	n1cnc(N)c(c12)c(Br)cn2[C@H]3[C@H](O)[C@H](O)[C@@H](N)C3	A-286501	9862222
576	c1ccccc1Nc2ncnc(c23)n(C4OC(CO)C(O)C4O)cc3-c5ccccc5	GP947
577	c1cc(F)ccc1Nc(ncn2)c(c23)c(-c4ccccc4)cn3[C@@H]5O[C@H](C)[C@@H](O)[C@H]5O	GP3269	9802216
578	n1cnc(N)c(c12)c(I)cn2[C@H]3[C@H](O)[C@H](O)[C@@H](N)C3	A-134974	9885936
579	O[C@@H]1[C@H](O)[C@@H](CO)C[C@H]1n2cnc(c23)c(N)ncn3	Aristeromycin	65269
580	O[C@@H]1[C@H](O)[C@@H](CO)O[C@H]1n2ccc(c23)c(N)ncn3	Tubercidin	6245
581	OC[C@H]1O[C@H](C[C@@H]1N)n2cnc(c23)c(N)ncn3	7403-25-0	165600
582	c1ccc(Br)cc1-c2cc(nc(c23)ncnc3N)-c(cc4)cnc4N5CCOCC5	ABT 702	1973
583	O[C@@H]1[C@H](O)[C@@H](C)O[C@H]1n2cc(-c3ccccc3)c(c24)c(ncn4)Nc5ccccc5	GP683	5311109
584	n1cnc(N)c(c12)c(Br)nn2[C@@H]3O[C@H](CN)[C@@H](O)[C@H]3O	GP515	132663
585	c1cc(Cl)c(C(F)(F)F)cc1NC(=O)Nc2ccc(cc2)Oc3cc(ncc3)C(=O)NC	Sorafenib	216239
586	C1COCCN1CCOc2ccc(c(c23)cccc3)NC(=O)Nc4cc(C(C)(C)C)nn4-c5ccc(C)cc5	Doramapimod	156422
587	C1[SH+][C@H]1C(=O)Oc(cccc2)c2Nc3nc(ncc3Cl)Nc4ccc(cc4)N5CCN(C)CC5	TL10-92	329588752
588	Cn1ncc(c1)Nc(ncc2Cl)nc2Oc3c(cccc3)NC(=O)CCS	6L4	329588775
589	SCC(=O)Nc(cccc1)c1Oc2nc(ncc2Cl)Nc3ccc(cc3)N4CCN(C)CC4	5KW	317231065
590	c1ccccc1NC(=O)Nc(ccc2)cc2-c(sc3)nc3C(=O)Nc(cc4)c(OC(C)C)cc4C(=O)N5CCN(C)CC5	6V4	122235219
591	c1ccccc1NC(=O)c(ccc2)cc2-c(sc3)nc3C(=O)Nc(cc4)c(OC(C)C)cc4C(=O)N5CCN(C)CC5	6V5	122235220
592	c1c[nH]c(c12)nccc2Oc(cc3)ccc3NC(=O)Nc(cc4)cc(c45)cccc5N6CCN(C)CC6	6V3	122235218
593	n1c[nH]c(=O)c(c12)scc2C(=O)Nc(cc3)c(-c4ccccc4)cc3C(=O)N5CCN(C)CC5	6KC	135567179
594	n1c[nH]c(=O)c(c12)scc2C(=O)Nc(ccc3)c(OC(C)C)c3C(=O)N4CCN(C)CC4	GTPL9453	135567181
595	n1c[nH]c(=O)c(c12)scc2C(=O)Nc(cc3)c(OC)cc3C(=O)NCCCN4CCN(C)CC4	6JV	135567180
596	C1CN(CC)CCN1Cc2c(C(F)(F)F)cc(cc2)NC(=O)c3cc(c(C)cc3)Oc4ccnc(c45)[nH]cc5	NG25	53340664
597	c1cnccc1Oc2ccc(cc2C)NC(=O)Nc3cc(C(C)(C)C)nn3-c4cc(C#N)ccc4	PF-04358168
598	c1ncccc1Oc2ccc(cc2)NC(=O)Nc3cc(C(C)(C)C)nn3-c4cc(F)ccc4	PF-05381941
599	c1ccc(F)cc1-n2nc(C(C)(C)C)cc2NC(=O)Nc3ccc(cc3)Oc4cccnc4	YIY	56965920
600	O=C(N)Nc(c1)c(C(=O)N)sc1-c(cc2)ccc2CN3CCOCC3	AZ-TAK1	9968854
601	O=C1[C@H](O2)[C@H]2[C@@H](O)C([C@@H]3O[C@H]4C)=C1[C@@H]4[C@H]([C@]356)[C@@H](C)OC=C5[C@H](O)[C@@H]7[C@@H](O7)C6=O	Epoxyquinol B	101203483
602	COc(c1)cc(O)c(c1[C@@H](O2)[C@H]23)C(=O)O[C@@H](C)C/C=C\C(=O)[C@@H](O)[C@@H](O)C3	Hypothemycin	9929643
603	COc(c1)cc(O)c(c12)C(=O)O[C@@H](C)C/C=C\C(=O)[C@@H](O)[C@@H](O)C/C=C/2	5Z-7-Oxozeaenol	9863776
604	c1ccc(C(=O)N)cc1C(=O)Nc(n2CCC)nc(c23)cccc3	Takinib	37750349
605	ClC(Cl)C(=O)N[C@H](CO)[C@H](O)c1ccc([N+]([O-])=O)cc1	CHLORAMPHENICOL	5959
606	O=[N+]([O-])c1ccc(C)c(c1)N(S(=O)(=O)C)CC(=O)Nc2cc(C)cc(c2)C	MBX2546
607	c1cccc(CC)c1OCCN2CCCCCC2	MBX2329	894607
608	C1CCCCC1C(=O)N(CC2=O)C[C@H](N23)c4c(CC3)cccc4	Praziquantel	4891
609	N#CC[C@@H](CC)OC(=O)N[C@@H](C)c1cc(ccc1)NC(=O)Nc2cc(OC)c(cc2)-c3ocnc3	AVN-944	9918559
610	O[C@@H]1[C@H](O)[C@@H](CO)O[C@H]1n2c(O)c(nc2)C(=O)N	Mizoribine	104762
611	C1COCCN1CC(=O)N(C)c2c(cccc2)-c3oc(nc3)Nc4cc(OC)c(cc4)-c5ocnc5	BMS-337197	497792
612	O=C(N)c(n1)csc1[C@@H]([C@H](O)[C@@H]2O)O[C@@H]2CO	Tiazofurin	457954
613	N#CC[C@H](CC)OC(=O)N[C@@H](C)c1cc(ccc1)NC(=O)Nc2cc(OC)c(C#N)cc2	VX-148	56603796
614	N#CC[C@H](CC)OC(=O)N[C@@H](C)c1cc(ccc1)NC(=O)Nc2cc(OC)c(cc2)-c3ocnc3	VX-944	16049814
615	C1OCC[C@@H]1OC(=O)NCc2cc(ccc2)NC(=O)Nc3cc(OC)c(cc3)-c4ocnc4	Merimepodib	153241
617	C1C[C@H](O)CC(=CC2)[C@@]1(C)[C@@H](CC3)[C@@H]2[C@@H]([C@]34C)CC[C@@H]4[C@H](C)CCC[C@@H](C)CO	27-Hydroxy cholesterol	99470
618	C1C[C@H](O)C(C)(C)[C@H](CC2)[C@@]1(C)[C@H]([C@@]23C)C(=O)C=C4[C@@]3(C)CC[C@]5(C)[C@H]4C[C@](C)(CC5)C(=O)O	Glycyrrhetinic acid	10114
619	[O-]S(=O)(=O)c(o1)c(C)c(C(=O)C2=O)c1c(cc3)c2c(c34)CCCC4(C)C	Tanshinone IIA sulfonate	40580588
620	O1C[C@H](C)C(C(=O)C2=O)=C1c(cc3)c2c(c34)CCCC4(C)C	Cryptotanshinone	160254
621	C[C@@H]1COC(=C12)c3c(C(=O)C2=O)c4c(cc3)c(C)ccc4	Dihydrotanshinone	5316743
622	c1cc(O)cc(c12)occ(c2=O)-c3cc(c(O)cc3)CC=C(C)C	Neobavaisoflavone	5320053
623	O=C(C)Oc(c1)sc(c12)CCN(C2)[C@@H](C(=O)C3CC3)c4c(F)cccc4	Prasugrel	6918456
624	CCN(CC)CC(=O)Nc1c(C)cccc1C	Lidocaine	3676
625	OC(=O)CCC(=O)N[C@@H](C[C@@H](C)C(=O)OCC)Cc1ccc(cc1)-c2ccccc2	Sacubitril	9811834
626	C1CCC[C@@H]([C@H]12)N([C@@H](C2)C(=O)O)C(=O)[C@H](C)N[C@H](C(=O)OCC)CCc3ccccc3	Trandolapril	5484727
627	c1cc(C(C)C)ccc1NC(=O)Oc(cc2)cc3c2N(C)[C@H]([C@]34C)N(CC4)CCc5ccccc5	Phenethylcymserine	9804733
628	o1cc(C)c(C(=O)C2=O)c1c(c23)ccc4c3cccc4C	Tanshinone	114917
629	c1cc(O)ccc1\C=C\[C@](C)(C=C)CCC=C(C)C	Bakuchiol	5468522
630	OC(=O)CCC/C=C\C/C=C\C/C=C\C/C=C\CCCCC	Arachidonic acid	444899
631	c1cc(O)cc(O)c1-c(o2)c(CC=C(C)C)c(=O)c(c23)c(O)cc(O)c3[C@H]4C=C(C)C[C@@H](c5c(O)cc(O)cc5)[C@@H]4C(=O)c6c(O)cc(O)cc6	Kuwanon G	5281667
632	Oc1cc(O)cc(c12)O[C@@H]([C@@H](O)C2=O)c3c(O)c(c(O)c(c3)CC=C(C)C)C/C=C(C)/CCC=C(C)C	Sanggenol D	15233695
633	CC(C)=CCC\C(C)=C\Cc(c(O)cc1)cc1[C@@H](O2)[C@@H](O)C(=O)c(c23)c(O)cc(O)c3CC=C(C)C	Sanggenol C	6475725
634	c1cc(O)cc(c12)occ(c2=O)-c(ccc3O)cc3C\C=C(C)\CCC=C(C)C	Corylifol A	25056407
635	c1cc(O)ccc1[C@H](CC2=O)Oc(c23)cc(OC)c(c3)CC=C(C)C	Bavachinin	10337211
636	C1=CC(C)(C)Oc(c12)ccc(c2)-c(c3=O)coc(c34)cc(O)cc4	Corylin	5316097
637	O1COc(c12)ccc(c2)C(O)(c(c3)ccc(c34)OCO4)C(CC5)CCN5C(=O)Oc6ccc([N+]([O-])=O)cc6	JZL184	25021165
638	C1C[C@H](O)C(C)(C)[C@H](CC2)[C@@]1(C)[C@H]([C@@]23C)CC=C4[C@@]3(C)CC[C@]5(C(=O)O)[C@H]4CC(C)(C)CC5	Oleanolic acid	10494
639	c1cc(Cl)ccc1C2(O)CCN(CC2)CCC(C(=O)N(C)C)(c3ccccc3)c4ccccc4	Loperamide	3955
640	CNC(=O)Oc(cc1)cc2c1N(C)[C@H]([C@]23C)N(C)CC3	Physostigmine	5983
642	c1cccc(c1c23)[nH]c2cccc3OC[C@H](O)CNCCOc4c(OC)cccc4	Carvedilol	2585
643	COC(=O)C1=C(C)NC(C)=C(C(=O)OCC)[C@@H]1c2cc([N+]([O-])=O)ccc2	Nitrendipine	4507
644	c1cccc(C(=O)O)c1-c(cc2)ccc2Cn3c(CCC)nc(c34)c(C)cc(c4)-c(n5C)nc(c56)cccc6	Telmisartan	65999
645	c1cc(Cl)ccc1C(=O)c(cc2)ccc2OC(C)(C)C(=O)OC(C)C	Fenofibrate	3339
646	C1CCCCN1C(CC2)CCN2C(=O)Oc(c3)ccc(n4)c3c(CC)c(C5)c4c(n56)cc7c(c6=O)COC(=O)[C@]7(O)CC	Irinotecan	60838
647	O=C(C)Oc1c(C(=O)O)cccc1	Aspirin	2244
648	O=C1N(C)C[C@@H](C(=O)O)N1C(=O)[C@H](C)N[C@H](C(=O)OCC)CCc2ccccc2	Imidapril	5464343
649	CCC(CC)O[C@@H]1C=C(C(=O)OCC)C[C@H](N)[C@H]1NC(=O)C	Oseltamivir	65028
650	c1cccc(Cl)c1[C@@H](C(=O)OC)N(C2)CCc(c23)scc3	Clopidogrel	60606
651	c1ccccc1[C@@H](C(=O)OC)[C@H]2NCCCC2	Methylphenidate	4158
652	O[C@H]1CCC=C([C@H]12)C=C[C@H](C)[C@@H]2CC[C@@H]3OC(=O)C[C@H](O)C3	MVB	4369567
653	CN(C)CCOc(cc1)ccc1/C(c2ccccc2)=C(/CC)c3ccccc3	Tamoxifen	2733526
654	OC(=O)CN(CC(=O)O)c1c(cccc1)OCCOc(cccc2)c2N(CC(=O)O)CC(=O)O	BAPTA	104751
655	C[C@@H]1C[C@H](OC)[C@H](O[C@@]12O)[C@@H](OC)C[C@@H](C)C/C(C)=C/[C@@H](CC=C)C(=O)C[C@H](O)[C@@H](C)[C@H](OC(=O)[C@H]3N(C(=O)C2=O)CCCC3)\C(C)=C\[C@H]4C[C@@H](OC)[C@H](O)CC4	FK506	445643
656	Clc1cc(Cl)c(OC)cc1-n(c2=O)c(=S)[nH]c(c23)cccc3	Mdivi-1	3825829
657	C1C(C)(C)CC(=O)c(c12)c(C(F)(F)F)nn2-c(ccc3C(=O)N)cc3N[C@@H]4CC[C@@H](O)CC4	SNX2112	24772860
658	Oc1cc(O)c(C(C)C)cc1C(=O)N(C2)Cc(c23)ccc(c3)CN4CCN(C)CC4	Onalespib	11955716
659	Clc(c1)cc(Cl)cc1Sc(nc(c23)c(N)ncn3)n2CCCNC(C)C	PU-WS13	71660551
660	C1[C@@H](C)C[C@H](OC)[C@H](O)[C@@H](C)/C=C(C)\[C@H](OC(=O)N)[C@@H](OC)/C=C\C=C(C)/C(=O)NC(C2=O)=CC(=O)C(=C12)OC	GELDANAMYCIN	5288382
661	Clc1c(O)cc(O)c(C(=O)OC)c1CCc(ncc2)n2Cc3oc(Cl)cc3	KUNG38	118988437
662	Clc1c(O)cc(O)c(C(=O)OC)c1CCc(ncc2)n2Cc3c(OCC)cccc3	KUNG29	127052285
663	Clc1c(O)cc(O)c(C(=O)OC)c1CCC(=O)NC2=CC(=O)C(OC)=CC2=O	Radamide	11429758
664	OP(=O)(O)C(C)(P(=O)(O)O)Oc1ccc(O)cc1	L-690,330	132449
665	c1ccccc1[C@@H](NC(=O)OC)C(=O)N2[C@@H](C[C@@H](C2)COC)c3[nH]c(cn3)-c(c4)ccc5c4COc(c6)c5cc(cc7)c6c(c78)nc([nH]8)[C@H](CC[C@@H]9C)N9C(=O)[C@H](C(C)C)NC(=O)OC	Velpatasvir	67683363
666	O=S(=O)(C)Nc(cc1)cc(c12)ccc(c2)-c(c(OC)c3C(C)(C)C)cc(c3)-n4c(=O)[nH]c(=O)cc4	Dasabuvir	56640146
667	COC(=O)N[C@@H](C(C)C)C(=O)N1[C@@H](CCC1)C(=O)Nc(cc2)ccc2[C@@H](N3c4ccc(C(C)(C)C)cc4)CC[C@H]3c5ccc(cc5)NC(=O)[C@H](CCC6)N6C(=O)[C@H](C(C)C)NC(=O)OC	Ombitasvir	54767916
668	c1ccccc1O[P@](=O)(N[C@@H](C)C(=O)OC(C)C)OC[C@H]([C@@H](O)[C@]2(F)C)O[C@H]2n3c(=O)[nH]c(=O)cc3	Sofosbuvir	45375808
669	COC(=O)N[C@@H](C(C)C)C(=O)N([C@@H](C[C@@H]12)CC2)[C@@H]1c([nH]3)nc(c34)ccc(c4)-c(cc5)cc(C6(F)F)c5c(c67)ccc(c7)-c(cn8)[nH]c8[C@H](CC19CC9)N(C1)C(=O)[C@H](C(C)C)NC(=O)OC	Ledipasvir	67505836
670	C1COCCN1CCOc(cc2)c(Cl)c(c23)nc(-c4nc(sc4)NC(C)C)cc3O[C@@H](C5)C[C@@H](C(=O)N[C@@]6(C(=O)O)[C@@H](C6)CC)N5C(=O)[C@H](C(C)(C)C)NC(=O)OC(C7)C[C@@H]([C@@H]78)C8	Vedroprevir	25167947
671	FC(F)(F)c(cc1)cc(C(F)(F)F)c1-c(cc2)nnc2Cn(c3)ccc(c34)nc(n4)-c5c(F)cccc5	Tegobuvir	23649154
672	O=S(=O)(C)Nc(cc1)cc(c12)S(=O)(=O)N=C(N2)C(=C(O)[C@@H]([C@@H]3[C@@H]45)[C@H](C4)CC5)C(=O)N3Cc6ccc(F)cc6	Setrobuvir	135565932
673	C1CC1S(=O)(=O)NC(=O)[C@@]23[C@@H](C3)/C=C\CCCCC[C@H](NC(=O)OC(C)(C)C)C(=O)N4[C@H](C(=O)N2)C[C@H](C4)OC(=O)N(C5)Cc(c56)cccc6F	Danoprevir	11285588
674	CC(C)C(=O)O[C@@H]([C@]1(F)C)[C@@H](COC(=O)C(C)C)O[C@H]1n2ccc(N)nc2=O	Mericitabine	16122663
675	n1cc(Br)cnc1-c(c2C3CCCC3)n(C)c(c24)cc(cc4)C(=O)NC5(CCC5)c(n6C)nc(c67)ccc(c7)/C=C/C(=O)O	Deleobuvir	56948249
676	CC(C)C(=O)Nc(sc1)nc1-c(nc(c23)c(Br)c(OC)cc3)cc2O[C@@H](C4)C[C@@H](C(=O)N[C@@]5(C(=O)O)[C@@H](C5)C=C)N4C(=O)[C@H](C(C)(C)C)NC(=O)OC6CCCC6	Faldaprevir	42601552
677	COC(=O)N[C@@H](C(C)C)C(=O)N1[C@@H](CCC1)c2[nH]c(cn2)-c3ccc(cc3)-c(cc4)ccc4-c(cn5)[nH]c5[C@H](CCC6)N6C(=O)[C@H](C(C)C)NC(=O)OC	Daclatasvir	25154714
678	CC(C)(C)C#Cc(c1)sc(C(=O)O)c1N([C@H]2CC[C@H](O)CC2)C(=O)[C@@H]3CC[C@@H](C)CC3	Lomibuvir	24798764
679	COC(=O)N[C@@H](C(C)C)C(=O)N1[C@@H](CCC1)c2[nH]c(cn2)-c(c3)ccc4c3cc(n45)c6c(O[C@H]5c7ccccc7)cc(cc6)-c(cn8)[nH]c8[C@H](CCC9)N9C(=O)[C@H](C(C)C)NC(=O)OC	Elbasvir	71661251
680	ICC(=O)N[C@@H](C(C)C)C(=O)N[C@H](C(=O)N)Cc1ccccc1	IVF	53908297
681	c1cc(F)ccc1CNC(=O)c(c(O)c2=O)nc(n2C)C(C)(C)NC(=O)c3oc(nn3)C	Raltegravir	54671008
682	FC1(F)CCC(CC1)C(=O)N[C@H](c2ccccc2)CCN([C@@H]34)[C@@H](CC4)C[C@@H](C3)n5c(C(C)C)nnc5C	Maraviroc	3002977
683	c1ccc(Cl)c(F)c1Cc(c(c2)OC)cc(c23)c(=O)c(C(=O)O)cn3[C@@H](C(C)C)CO	Elvitegravir	5277135
684	c1cc(F)cc(F)c1CNC(=O)c(c2)c(=O)c(O)c(C3=O)n2C[C@@H](N34)OCC[C@H]4C	Dolutegravir	54726191
685	N#C\C=C\c(cc1C)cc(C)c1Nc2nc(ncc2)Nc3ccc(C#N)cc3	Rilpivirine	6451164
686	C1CC1N2c(nccc3)c3C(=O)Nc(c24)c(C)ccn4	Nevirapine	4463
687	N#Cc(cc1)ccc1Nc(nc(N)c2Br)nc2Oc3c(C)cc(C#N)cc3C	Etravirine	193962
688	Clc(c1)ccc(c12)NC(=O)O[C@@]2(C(F)(F)F)C#CC3CC3	Efavirenz	64139
689	OP(=O)(O)CO[C@H](C)Cn1cnc(c12)c(N)ncn2	Tenofovir	464205
690	OC[C@@H](SC1)O[C@@H]1n2ccc(N)nc2=O	Lamivudine	60825
691	OC[C@@H](SC1)O[C@@H]1n2cc(F)c(N)nc2=O	Emtricitabine	60877
692	OC[C@H](C=C1)C[C@H]1n2cnc(c23)c(nc(n3)N)NC4CC4	Abacavir	441300
693	C1CC1(C)S(=O)(=O)NC(=O)[C@@]2([C@@H](C2)C(F)F)NC(=O)[C@@H](N34)[C@H](CC)[C@@H](C3)Oc5c(nc6c(n5)cc(OC)cc6)C(F)(F)CCCC[C@H]7[C@@H](C7)OC(=O)N[C@H](C4=O)C(C)(C)C	Voxilaprevir	89921642
694	OC(C1)CC(C)(C)C(C1(C)C)/C=C/C(C=O)=C/C(=O)\C=C(/C)\C=C\C=C\C(C)=C\C=C\C(\C)=C\C=C\2[C@@](O)(C)C[C@H](OC(=O)C)CC2(C)C	Ifx-1	137254326
695	C1C[C@H](OC)C[C@@H](CO)N1Cc2c(C)cc(C)c(c23)[nH]cc3	JGN	138753276
696	N1CCN=C1Nc2c(Br)cc(C)c(c23)cccc3	JGT	384992740
697	OC(=O)c(cc1)ccc1[C@H](CCCC2)N2Cc3c(C)cc(C)c(c34)[nH]cc4	MVK	124673684
698	c1ccccc1[C@H](CCCC2)N2Cc3c(C)cc(C)c(c34)[nH]cc4	MVW	124673805
699	n1cc[nH]c1Nc2c(Br)cc(C)c(c23)[nH]cc3Cl	MVZ	146018702
700	OC(=O)c(cc1)ccc1[C@H](C[C@H](CC2)OCC)N2Cc3c(OC)cc(C)c(c34)[nH]cc4	LNP023	90467622
701	c1ccc(Br)nc1NC(=O)[C@H](C[C@@H](F)C2)N2C(=O)Cn3nc(C(=O)C)c(c34)cc(cc4)-c5cnc(C)nc5	ACH 4471	118323590
702	Fc1cccc(C)c1C(=O)N2[C@H]([C@H](CCC2)C(=O)Nc3cc(C(F)(F)F)c(C)cc3)c4ccc(cc4)NC5CCCC5	CCX168	49841217
703	C1COCCC1CNC(=O)c2[nH]cc([n+]23)ccc(c3)-c4cc(OC(C)C)cnc4	OHK	146672946
704	O=C1CN(C)CCN1c2c(-c3c(Cl)cc(Cl)cc3)nc(cc2)NCCNc4nc(N)c([N+]([O-])=O)cc4	QQA	11548266
705	CCN(CC)c1cc(O)c(cc1)/C=C(\C)C(=O)O	DMC	5288082
706	O=C(C)N[C@@H](CC(C)C)C(=O)N[C@H](C(=O)C(F)(F)F)Cc1ccccc1	LPF	3082654
707	FC(F)(F)C(=O)[C@@H](NC(=O)C)Cc1ccccc1	APF	124969
708	Cc1n[nH]c(=O)nc1Nc2c(O)ccc(c2)C	BAS 11084479	3928466
709	C1CC[C@@H](C(=O)O)[C@@H]1[C@H]2OC(=O)C[C@H](O)[C@@H](C)C[C@@H](C)C[C@@H](C)C[C@H](C)[C@@H](O)/C(C#N)=C\C=C\C2	Borrelidin	6436801
710	Clc(c1)c(Br)cc(c12)ncn(c2=O)CC(=O)C[C@@H]3NCCC[C@H]3O	Halofuginone	400772
711	N[C@@H]1[C@@H](O)[C@H](O)[C@@H](CN)O[C@@H]1O[C@H]([C@@H](N)C[C@@H](N)[C@@H]2O)[C@@H]2O[C@@H]3O[C@H](CO)[C@H]([C@H]3O)O[C@H]4O[C@@H](CN)[C@@H](O)[C@H](O)[C@H]4N	Neomycin	8378
712	O[C@@H]1[C@@H](N)[C@H](O)[C@@H](CO)O[C@@H]1O[C@@H]2[C@@H](O)[C@@H]([C@@H](N)C[C@H]2N)O[C@H]3O[C@H](CN)[C@@H](O)C[C@H]3N	Tobramycin	36294
713	O=C1C=C(OC)C(=O)c(c2O)c1c(O)c(C3)c2O[C@]34Oc5c([C@@H](O)C4)cc6c(c5O)c(=O)oc(c6)C(=O)OC	Purpuromycin	5377963
714	OC(=O)[C@@H]([C@H]1C)Sc(c2c13)cccc2[nH]c3	Chuangxinmycin	3037261
715	O=C1NC(=N\C)/O[C@H]1[C@H](C)c2c[nH]c(c23)cccc3	Indolmycin	135417159
716	[Fe+3].c1cc(=O)n(C)c(=O)n1[C@@H]([C@H](O)[C@@H]2O)S[C@@H]2C(O)C(C(=O)O)NC(=O)C(CO)NC(=O)C(CCCN(O)C(=O)C)NC(=O)C(CCCN(O)C(=O)C)NC(=O)C(N)CCCN(O)C(=O)C	Albomycin	3083716
717	C1CCN[C@@H]1C(=O)N[P@@](=O)(OC)OC[C@H]([C@@H](O)[C@H]2O)O[C@H]2n3c(=O)[nH]c(c34)c(N)ncn4	Phosmidosine	456511
718	OC(=O)[C@H]1[C@@H](N)CCC1	Cispentacin	73305
719	N1CCC[C@@H]([C@@H]12)O[C@](O)(C2)Cn(c3=O)cnc(c34)cccc4	Isofebrifugine	9851693
720	O[C@@H]1CCCN[C@@H]1CC(=O)Cn(c2=O)cnc(c23)cccc3	Febrifugine	115723
721	Clc(n1)nc(N)c(c12)ncn2[C@@H]3O[C@@H]([C@@H](O)[C@H]3O)COS(=O)(=O)NC(=O)[C@@H](N)C	Ascamycin	13994715
722	C1[C@@H](C)OC(=O)c(c12)c(O)c(cc2Cl)C(=O)N[C@H](C(=O)O)Cc3ccccc3	Ochratoxin A	442530
723	O[C@@H]1C[C@@H](O[C@@H]2C)C(=C3[C@]12O)C(=O)c4c(C3=O)c(O)c5c(c4O)[C@H]6[C@H](CC(O6)=O)O[C@@H]5C	Granaticin	441183
724	OC(=O)CCC(=O)O[C@@](CC1)(CCCC)[C@H](/C=C/C(C)=C/C(=O)O)O[C@]12O[C@@H]([C@@H](C)CC2)C/C=C(\C)/C=C/[C@H](O)[C@@H](C)/C=C/C(=O)O	Reveromycin A	9939559
725	O=C(N)OC(C)C(C)C(=O)NCC(O)CC(=O)CC(C)C/C=C/C=C/CCC(=C)CC(C)C/C(C)=C/C(=O)O	Batumin	197707
726	O[C@@H](C)[C@H](C)[C@@H]1O[C@H]1C[C@@H]2[C@@H](O)[C@@H](O)[C@@H](OC2)C/C(C)=C/C(=O)OCCCCCCCCC(=O)O	Mupirocin	446596
727	CSCC[C@H](NC=O)C(=O)N[C@@H](CCCN=C(N)N)C(=O)N[C@@H]([C@H](O)C)C(=O)NCC(=O)N[C@@H](CC(=O)N)C(=O)N[C@@H](C)C(=O)N[C@@H](CC(=O)O)C(=O)NP(=O)(OCCCN)OC[C@H]1O[C@H]([C@H](O)[C@@H]1O)n2cnc(c23)c(N)ncn3	Microcin C	53476539
728	CC(C)CC[C@]1(O)[C@@](O)(C(=O)OC)[C@@H](C)C(=O)c(c12)cc3c(c2)c(O)ccc3	Rishirilide	12068756
729	c1cnc(N)nc1-c(c(c2n34)c(=O)cc[nH]2)c3ccnc4N	Variolin B	9817550
730	Oc(c1)cc(O)cc1CCCCCCCCCCCCCCC	Adipostatin	76617
731	c1cc(O)ccc1\C=C(\N2C)C(=O)N[C@@H](CC(C)C)C(=O)N[C@H](Cc3ccccc3)C(=O)N[C@@H]([C@@H](O)C)C(=O)N[C@@H](CC(=O)N)C(=O)N[C@@H](CO)C(=O)O[C@H](C)[C@@H](C2=O)NC(=O)/C=C/c4c(cccc4)/C=C\CCC	WS9326A	6918144
732	C[C@@]12[C@@H](O1)C(=O)[C@@H]3O[C@@]2(C)O[C@@H]([C@H]3C)[C@H](C)/C=C(\C)/C=C/C(/O)=C4/C(=O)CNC4=O	Tirandamycin	54706137
733	CC[C@H](C)[C@H](N)C(=O)O[C@H]1[C@@H](O)[C@@H](O[C@@H]1COP(=O)(O)O)n2cnc(c23)c(N)ncn3	Isoleucyl-AMP	118797931
735	C1CC[C@H](C)O[C@H]1C[C@@H](C2)OC(=O)c(c23)c(O)cc(O)c3	Cladosporin	13990016
736	CC(C)CC[C@@H](CC(=O)O)C(=O)N1NCCC[C@@H]1C(=O)N[C@H](C(C)C)C(=O)CC	Sch 382583	139584811
737	C[C@H]1OC(=O)/C=C\C=C\C[C@H](O)/C=C/C=C\CCCC(=O)CC\C=C\CCC1	Macrolactin N	16046174
738	C\C=C\c1c(O)c(O)cc(c12)OC(=O)[C@]2(C)NC(=O)/C=C/C(=O)O	Fumimycin	50907655
739	C1CCCC1C[C@H](CN(O)C=O)C(=O)NNc(c2F)nc(C)nc2N(CC3)C[C@H](N34)COCC4	Lanopepden	52918384
740	O=CN(O)C[C@@H](CCCC)C(=O)N1[C@@H](CCC1)C(=O)Nc2ncccc2	PDF-611	16077372
741	ONC(=O)C[C@@H](CCCC)C(=O)N1[C@@H](CCC1)C(=O)Nc2ncccc2	LBK-611	49771302
742	Fc(c1)ccc(/n1O)=N\C(=O)[C@H](CCC2)N2C(=O)[C@@H](CN(O)C=O)CCCC	LBM-415	9690139
743	ONC(=O)C[C@H](CCCC)C(=O)N[C@@H](CC(C)C)C(=O)Nc(c1)ccc(c12)cccc2	VRC 3324	20979065
744	CN(C)C(=O)[C@H](C(C)(C)C)NC(=O)[C@@H](CN(O)C=O)CCCC	BB-3497	159596
745	C1CCCC1C[C@H](CN(O)C=O)C(=O)N[C@@H](C(C)(C)C)C(=O)N2CCN(CC2)Cc(c3)ccc(c34)OCO4	BB-83698	9849925
746	c1ccccc1CCOC(=O)\C=C\c2cc(O)c(O)cc2	QAP	5281787
747	O=C(C)Oc(cc1)c(OC(=O)C)cc1/C=C/C(=O)NCCc2ccccc2	Y12	11957394
748	c1cc(O)ccc1CCNC(=O)/C=C/c2cc(O)c(O)cc2	Y13	9994897
749	c1ccoc1CCN	56T	1132863
750	FC(F)c([nH]1)nc(c12)cccc2	56U	597703
751	O[C@@H]1CSc2nc(c3n12)cccc3	56V	786290
752	O=C1NC(=S)NC(=O)C1C(C)C	56L	1540621
753	c1sc(C)nc1-c2cc(N)ccc2	56K	736535
754	c1csc(c12)cc([nH]2)C(=O)O	4WL	4961254
755	c1sc(C)cc1C(=O)NCC(=O)OCC	56E	2971321
756	c1cc(Cl)ccc1CS(=O)(=O)NC	56F	1248124
757	Fc(c1)cc(F)cc1NC(=O)N[C@@H](C(C)(C)C)C(=O)N(CC(=O)NO)CC2CCCC2	UDB	11339657
758	C1CCCC1CN(CC(=O)NO)C(=O)[C@H](C(C)(C)C)NC(=O)Nc2c(OC)cccc2	MDB	9954612
759	O=CN(O)C[C@@H](CCCC)C(=O)[C@H](C(C)C)NC(=O)Nc1ncc(C)cc1	UHF	16043336
760	c1cccc(F)c1NC(=O)N[C@@H](C(C)C)C(=O)[C@@H](CN(O)C=O)CCCC	FHF	53320567
761	C1CCCC1C[C@H](CN(O)C=O)C(=O)N2[C@@H](CCC2)C(=O)NC(=O)c3ccccc3	0S5	16035825
762	O=CN(O)CCCc1nc(C)ccc1	SB-505684	5289331
763	O=CN(O)CCOc(ccc1)cc1C(=O)c2ccccc2	SB-543668	5289330
764	c1cc(Br)cc(c12)ccn2CC(=O)NO	SMP289	319530557
765	CC(C)(C)OC(=O)N[C@H](CN(O)C=O)Cc1ccccc1	RAS358	9835766
766	n1cnoc1[C@@H](CC(=O)NO)C=C2CCCC2	AT020	319530550
767	Brc(c1)ccc(c12)[nH]cc2CC(=O)NO	BB4	11572551
768	ONC(=O)C[C@@H](CCCC)c1onc(n1)Cc2ccc(cc2)C(=O)OC	SF5	137349996
769	n1cnoc1[C@@H](CC(=O)NO)C=C2CCCC2	6JT	319530546
770	c1cc(F)ccc1Cc(n2)noc2[C@H](CCCC)CC(=O)NO	SF7	60143273
771	c1ccccc1CSC(=O)[C@@H](CC(=O)O)Cc2ccccc2	K2U	404418199
772	c1ccccc1C(=O)CSC(=O)[C@@H](CC(F)(F)F)Cc2ccccc2	K3U	139267725
773	c1ccccc1C(=O)CSC(=O)[C@@H](CC(=O)O)Cc2ccccc2	K1U	139267723
774	ONC(=O)N[C@H](C(=O)O)Cc1ccccc1	LHY	446056
775	ONC(=O)C[C@@H](S1)C(=O)Nc(c12)cccc2	GNR	448475
776	C1CC[C@@H](CO)N1C(=O)[C@H](C(C)C)NC(=O)[C@@H](CC(=O)NO)CCCCC	ACTINONIN	443600
777	C1CCCC1C[C@H](CN(O)C=O)C(=O)NNc(c2F)nc(C)nc2N(CC3)C[C@H](N34)COCC4	NB4	384642012
778	C1CCCC1C[C@H](CN(O)C=O)C(=O)N2NCCC[C@H]2C(=O)Nc3ncccc3	N9Y	138454269
779	OCN(O)CCCc1ccccc1	SB-485345	5289329
780	n1c(N)sc(c12)cc(F)cc2F	3H7	737406
781	c1cc(F)ccc1-c2[nH]ncc2C(=O)Nc([nH]3)nc(c34)cccc4	3H6	17452964
782	Cn1nc(C)c(c1)C(=O)Nc([nH]2)nc(c23)cccc3	3H5	42285820
783	c1ccccc1S(=O)(=O)\C=C\C(CCc2ccccc2)NC(=O)C(CCCON=C(N)N)NC(=O)N3CCN(C)CC3	WRR-483	139033386
784	CCOc1ccc(S(=O)(=O)NC(=O)OC(C)C)cc1-c(n2)[nH]c(=O)c(c23)n(C)nc3CCC	WYQ	135566614
785	c1ccccc1C[C@@H](C(=O)NC[C@@H](S)N)NC(=O)c2ccccc2	33L	381319919
786	ClCCN(CCCl)CCC[C@@H](C)Nc1c(ccc(Cl)c2)c2nc(c13)ccc(c3)OC	QUINACRINE MUSTARD	20194
787	OC(=O)[C@@H](N)CCC(=O)N[C@@H](CS)C(=O)NCC(=O)NCCCCNCCCNC(=O)CNC(=O)[C@H](CS)NC(=O)CC[C@H](N)C(=O)O	Trypanothion	449517
788	O=C(O)[C@H](S)[C@H](O)C(=O)N[C@@H](C(=O)NCCC(C)C)CCc1ccccc1	WRR-99	381340113
789	O=C(O)[C@H](S)[C@H](O)C(=O)N[C@H](C(=O)NCCC(C)C)CCc1ccccc1	WRR-112	381340319
790	c1ccccc1OS(=O)(=O)CC[C@H](CCc2ccccc2)NC(=O)[C@H](Cc3ccccc3)NC(=O)OCc4ccccc4	WRR-204	17754216
791	c1ccccc1C[C@@H](C(=O)CO)NC(=O)[C@H](Cc2ccccc2)NC(=O)OCc3ccccc3	VS2	5289424
792	[O-][N+](=O)c(cc1)ccc1OS(=O)(=O)CC[C@H](CCc2ccccc2)NC(=O)[C@H](Cc3ccccc3)NC(=O)OCc4ccccc4	VS3	5289561
793	c1ccccc1CONS(=O)(=O)CC[C@H](CCc2ccccc2)NC(=O)[C@H](Cc3ccccc3)NC(=O)N4CCN(C)CC4	VS4	5289562
794	c1ccccc1CC[C@@H](C(=O)CF)NC(=O)[C@H](CC(C)C)NC(=O)N2CCOCC2	0I5	25108695
795	SCC(=O)C(C)NC(=O)[C@H](CCCNC(=[NH2+])N)NC(=O)OCc1ccccc1	ZRA	381343885
796	O=C(N)c1ccsc1NC(=O)CSc2[nH]ncn2	Nequimed176	40701156
797	c1ccccc1S(=O)(=O)\C=C\[C@H](CCc2ccccc2)NC(=O)[C@H](CCCN=C(N)N)NC(=O)N3CCN(C)CC3	WRR483	25028695
798	CCCC[C@@H](C(=O)C)n1nnc(c1)[C@](C)(C(C)C)NCc(c2)ccc(c23)nccc3	KB2	49867189
799	Fc(c1)cc(F)cc1Nc(nc(n2)C#N)c(c23)ncn3CC	QL2	44143088
800	c1cc(Cl)ccc1C(=O)[C@H](CCCC2)[C@@H]2C(=O)N[C@@H](CCCC)CCS(=O)(=O)c3ccccc3	25B	49866437
801	c1ccccc1S(=O)(=O)C[C@@H](S)[C@H](CCc2ccccc2)NC(=O)[C@H](Cc3ccccc3)NC(=O)N4CCN(C)CC4	K11777	48426105
802	O=CC(=O)\C=C\[C@H](C)NC(=O)[C@@H](Cc1ccccc1)NC(=O)OCc2ccccc2	186	5287438
803	c1ccccc1CC[C@@H](C(=O)CO)NC(=O)[C@H](Cc2ccccc2)NC(=O)OCc3cccnc3	P10	5289091
804	c1ccccc1S(=O)(=O)CC[C@H](CCc2ccccc2)NC(=O)[C@H](Cc3ccccc3)NC(=O)N4CCOCC4	VS1	5289559
805	c1cc(O)ccc1C[C@@H](C(=O)N[C@@H](C)C(=O)CF)NC(=O)OCc2ccccc2	ZYA	15118984
806	C1CNCCN1c(cc2)ccc2-c3ccc(cc3)C(C(F)(F)F)NC(CC(C)(C)C(F)(F)F)C(=O)NCC#N	Cz008
807	O=S(=O)(C)c1ccc(cc1)-c2ccc(cc2)C(C(F)(F)F)NC(CC(C)(C)C(F)(F)F)C(=O)NC(C#N)Cc3ccc(C#N)cc3F	CZ007
808	c1cccc(Br)c1OCC(=O)NCCc([nH]2)nc(c23)cccc3	B95	1183113
809	N#CCNC(=O)C1(CCCCC1)NC(=O)c(cc2)ccc2N(CC3)CCN3CCC	AAE581	10201696
810	c1cccnc1S(=O)(=O)N2CCC[C@@H](C(=O)C2)NC(=O)[C@H](CC(C)C)NC(=O)c(c3)oc(c34)cccc4	SB-357114	5287468
811	CC1=C(C=C)C(=O)N[C@H]1Cc2[nH]c(c(c2C)CCC(=O)O)\C=c3\[nH]/c(c(C)c3CCC(=O)O)=C/C4=NC(=O)[C@H](C)C\4=C\C	Phycoerythrobilin	5460417
812	O=c1[nH]c(N)nc(c12)cc3c(c2)[nH]cn3	344	135483591
813	O=c1[nH][nH]c(=O)c(c12)ccc(N)c2	APZ	95014
814	O=c1[nH]c(N)nc(c12)[nH]cc2CN	PRF	135398563
815	n1c(N)[nH]c(=O)c(c12)cccc2C	MAQ	135460982
816	O=c1[nH]c(N)nc(c12)ccc(N)c2	DQU	135413405
817	n1cc[nH]c1SCc2cc(N)cc(c23)c(=O)[nH]c(n3)N	AIQ	135460962
818	CCCSCc1cc(N)cc(c12)c(=O)[nH]c(n2)N	APQ	135461936
819	COc1ccccc1Cc2ccc(cc2)CP(=O)(O)CC(C(=O)NC(C(C)(C)C)C(=O)NC)CCc3ccc(C)cc3	582311-81-7
820	c1ccccc1-c2ccc(cc2)-c3ccc(cc3)CNC(=O)c4oc(C)cc(=O)c4O	868368-30-3
821	c1cc(F)c(C)cc1CNC(=O)c2ncnc(c2)C(=O)NCc3cc(C)c(F)cc3	544678-85	5289110
822	c1ccccc1-c(cc2)ccc2C3(C(=O)NC(=O)NC3=O)N4CCN(CC4)c5ccc([N+]([O-])=O)cc5	Ro 28-2653	9832179
823	Clc1ccc(cc1)Oc2ccc(cc2)S(=O)(=O)C3(C(=O)NO)CCN(CC3)Cc4ccccc4	239796-97-5
824	FC(F)(F)Oc(cc1)ccc1-c(cc2)ccc2OC[C@@H](N(O)C=O)CN(C3=O)C(=O)NC3(C)C	ABT-770	9869811
825	c1cccc(c12)[nH]cc2C[C@H](C(=O)O)NS(=O)(=O)c3ccc(cc3)-c(nn4)nn4-c5ccccc5	MMI-166	9870100
826	C1CC1NC(=O)C(=O)[C@H](CCC)NC(=O)[C@H]2N(C[C@@H]([C@@H]23)CCC3)C(=O)[C@H](C(C)(C)C)NC(=O)[C@H](C4CCCCC4)NC(=O)c5nccnc5	Telaprevir	3010818
827	C1CC1S(=O)(=O)NC(=O)[C@@]23[C@@H](C3)/C=C\CCCCN(C)C(=O)[C@H]4[C@H](C(=O)N2)C[C@H](C4)Oc5cc(nc(c56)c(C)c(OC)cc6)-c7scc(n7)C(C)C	Simeprevir	24873435
828	C1CC1S(=O)(=O)NC(=O)[C@@]23[C@@H](C3)/C=C\CCCCC[C@H](NC(=O)c4ncc(C)nc4)C(=O)N5[C@H](C(=O)N2)C[C@H](C5)Oc6nc(cccc7)c7c(c68)cccc8	Paritaprevir	45110509
829	C1CC1(C)S(=O)(=O)NC(=O)[C@@]2([C@@H](C2)C(F)F)NC(=O)[C@@H](N34)C[C@H](C3)Oc5c(nc6c(n5)cccc6)C(F)(F)/C=C\CO[C@H]7[C@@H](CCC7)OC(=O)N[C@H](C4=O)C(C)(C)C	Glecaprevir	66828839
830	C1CCCC1N2CCC(CC2)Nc(s3)nc(c34)ccc(c4)S(=O)(=O)N(CC(C)C)C[C@@H](O)[C@H](Cc5ccccc5)NC(=O)O[C@H]6CO[C@H]([C@H]67)OCC7	TMC-310911	53361968
831	c1cccc(c12)C[C@@H](O)[C@H]2NC(=O)[C@H](Cc3ccccc3)C[C@H](O)CN4[C@H](C(=O)NC(C)(C)C)CN(CC4)Cc(c5)oc(c56)cccc6	L-756423	5481481
832	c1cccc(C)c1CNC(=O)[C@H]2N(CSC2(C)C)C(=O)[C@@H](O)[C@H](Cc3ccccc3)NC(=O)c4c(C)c(O)ccc4	JE-2147	446837
833	Clc(c1)ccc(c12)c(OC)cnc2O[C@@H](C3)C[C@H](N3C(=O)[C@H](C(C)(C)C)NC(=O)OC(C)(C)C)C(=O)N[C@]4([C@@H](C4)C=C)C(=O)NS(=O)(=O)C5CC5	Asunaprevir	16076883
834	c1cc(N)ccc1S(=O)(=O)N(CC(C)C)C[C@@H](OP(=O)(O)O)[C@H](Cc2ccccc2)NC(=O)O[C@H]3CCOC3	Fosamprenavir	131536
835	CCOC(=O)NCc(co1)c(c12)cc(cc2)S(=O)(=O)N(CC(C)C)CC(O)[C@@H](Cc3ccccc3)NC(=O)OC4CO[C@H]([C@H]45)OCC5	SPI-256
836	C1CO[C@@H]([C@@H]12)OC[C@@H]2OC(=O)N[C@H]([C@H](O)CN(CC(C)C)S(=O)(=O)c3ccc(OC)cc3)Cc4ccc(cc4)OCP(=O)(OCC)OCC	GS 8374	12004117
837	c1ccc(O)c(C)c1C(=O)N[C@@H](CSc2ccccc2)[C@H](O)CN([C@@H](C3)C(=O)NC(C)(C)C)C[C@H]([C@H]34)CCCC4	Nelfinavir	64143
838	c1ncccc1CN(CC2)C[C@@H](C(=O)NC(C)(C)C)N2C[C@@H](O)C[C@@H](Cc3ccccc3)C(=O)N[C@@H]4[C@H](O)Cc(c45)cccc5	Indinavir	5362440
839	C1CCC[C@@H]([C@@H]12)CN([C@@H](C2)C(=O)NC(C)(C)C)C[C@@H](O)[C@H](Cc3ccccc3)NC(=O)[C@H](CC(=O)N)NC(=O)c(n4)ccc(c45)cccc5	Saquinavir	441243
840	c1ccccc1C[C@H](NC(=O)[C@H](C(C)(C)C)NC(=O)OC)[C@@H](O)CN(NC(=O)[C@H](C(C)(C)C)NC(=O)OC)Cc2ccc(cc2)-c3ncccc3	Atazanavir	148192
841	c1cc(N)ccc1S(=O)(=O)N(CC(C)C)C[C@@H](O)[C@H](Cc2ccccc2)NC(=O)O[C@H]3CCOC3	Amprenavir	65016
842	FC(F)(F)c(cc1)cnc1S(=O)(=O)Nc(ccc2)cc2[C@@H](CC)C(=C(O)C3)C(=O)O[C@]3(CCC)CCc4ccccc4	Tipranavir	54682461
843	c1cc(N)ccc1S(=O)(=O)N(CC(C)C)C[C@@H](O)[C@H](Cc2ccccc2)NC(=O)O[C@H]3CO[C@H]([C@H]34)OCC4	Darunavir	213039
844	c1cc(N)ccc1S(=O)(=O)N(CC(C)C)[C@@H](CO)CCCCNC(=O)[C@@H](NC(=O)OC)C(c2ccccc2)c3ccccc3	PL-100	513956
845	O=C1NCC[C@H]1C[C@@H](/C=C\C(=O)OCC)NC(=O)[C@H](CC(C)C)NC(=O)[C@H](C(C)C)NC(=O)[C@H](C)NC(=O)c2noc(c2)C	I12	6323379
846	c1ccccc1COC(=O)N[C@@H](CC(C)C)C(=O)N[C@@H](Cc2ccccc2)C(=O)NN(CCC(=O)N)C(=O)C[C@H](O)C(=O)OCC	AZP	5287723
847	O=C1NCC[C@H]1C[C@@H](/C=C/C(=O)OCC)NC(=O)[C@H](CC=C(C)C)CC(=O)[C@H](C(C)C)NC(=O)c2noc(c2)C	CY6	10062715
848	c1ccccc1COC(=O)/C=C\[C@H](C[C@@H]2CCNC2=O)NC(=O)[C@H](CC(C)C)NC(=O)[C@H](C(C)C)NC(=O)[C@H](C)NC(=O)c3noc(c3)C	GTPL10716	146025593
849	c1ccccc1COC(=O)N[C@@H](C(C)OC(C)(C)C)C(=O)N[C@@H](CC(C)C)C(=O)N[C@@H](CC2C(=O)NCC2)/C=C/C(=O)C3CC3	TG-0205486	49771528
850	CC1=C(C=C)C(=O)N[C@@H]1Cc2[nH]c(c(c2C)CCC(=O)O)/C=c3\[nH]/c(c(C)c3CCC(=O)O)=C/C4=NC(=O)C(C)=C4C=C	DBV	443316
851	OS(=O)(=O)CCN1CCN(CC1)CCO	HEPES	23831
852	c1ccccc1C[C@@H](C(=O)O)NC(=O)N[C@@H](C2NC(N)=NCC2)C(=O)N[C@@H](CC(C)C)C(=O)N[C@H](C=O)Cc3ccccc3	Chymostatin	443119
853	[H]/N=C(N)/SCCC[C@@H](B(O)O)NC(=O)[C@H](CCC1)N1C(=O)[C@H](NC(=O)CC)Cc2ccccc2	TRI166	49867709
854	OC1=C(C(=O)N)C(=O)C[C@@H]([C@@]12O)C[C@H]3C(C2=O)=C(O)c4c([C@]3(O)C)cccc4O	CMT-1	54679182
855	c1cc(O)ccc1/C=C/C(=O)O	p-Coumaric acid	322
856	c1cc(O)c(OC)cc1/C=C/C(=O)O	Ferulic acid	445858
857	c1cc(O)c(O)cc1/C=C/C(=O)O	Caffeic acid	689043
858	OC(=O)\C=C\c1ccccc1	Cinnamicacid	8784
859	CC(C)=CCc1c(O)c(CC=C(C)C)cc(c1)/C=C/C(=O)O	Artepillin C	5472440
860	c1cc(N)ccc1Oc2ccc(cc2)S(=O)(=O)CC3CS3	ND-322
861	CC1(C)N(C)C(=O)N(C1=O)CC[C@H](S)C(=O)N[C@@H](CC(C)C)C(=O)NC(=O)[C@@H](NC)C(C)(C)C	BMS 275291	148203
862	c1cc(OC)ccc1C(=O)Nc(cc2)ccc2S(=O)(=O)N[C@@H](C(=O)O)CC#CCN3CCOCC3	PG-530742	9848869
863	c1cc(Cl)ccc1Oc(cc2)ccc2S(=O)(=O)CC3(C(=O)NO)CCOCC3	RS-130830	3342298
864	C1CCCC1(C(=O)NO)N(CCC(=O)O)S(=O)(=O)c2ccc(cc2)Oc3ccc(F)cc3	CP-471358	9869142
865	C1COCCN1CCN([C@H](C(C)C)C(=O)NO)S(=O)(=O)c2ccc(cc2)NC(=O)c(cc3)ccc3CCCCC	SC-74020	5288596
866	c1cccc(c1n23)c(c3)C[C@H](NC(=O)[C@H](CC(C)C)CC(=O)O)C(=O)NCCCCCC2	1mmp	5289314
867	OC[C@H]1O[C@H](C[C@@H]1O)n2c(=O)nc(N)nc2	Decitabine	451668
868	O[C@@H]1[C@H](O)[C@@H](CO)O[C@H]1n2c(=O)nc(N)nc2	Azacitidine	9444
869	c1[nH]c(=O)cc(C(F)(F)F)c1C(=O)Nc(c2N3CCN(C)CC3)cc(cc2)-c(ccc4)cc4CN5CCOCC5	OICR-9429	91623360
870	FC(F)(F)Cc(c1)sc(c12)ncnc2NC(CC3)CCN3Cc(c4C)ccc(c45)n(c(c5)C#N)Cc6c[nH]nc6	MI-503	91667931
871	C1CCCN1C(=O)CNC(=O)Nc(c2)ccc(c23)cncc3	SGC707	90642938
872	COCCN(C)[C@@H](CC1)CC[C@@H]1N(CC)c2c(C)c(C(=O)NCc3c(C)cc(C)[nH]c3=O)cc(c2)C#CCN4CCOCC4	EPZ011989	73670548
873	O=c1[nH]c(C)cc(CCC)c1CNC(=O)c(c(c23)cnn2C(C)C)cc(c3)-c(cc4)cnc4N(CC5)CCN5C(C)C	UNC1999	72551585
874	O=c1[nH]c(C)cc(CCC)c1CNC(=O)c(c(c23)cnn2C(C)C)cc(c3)-c(c4)ccnc4N5CCN(C)CC5	GSK343	71268957
875	O=c1[nH]c(C)cc(C)c1CNC(=O)c(c(C)c2N(CC)C3CCOCC3)cc(c2)-c4ccc(cc4)CN5CCOCC5	Tazemetostat	66558664
876	O=c1[nH]c(C)cc(C)c1CNC(=O)c(c(c23)c(C)cn2[C@@H](C)CC)cc(c3)-c4ccc(nc4)N5CCNCC5	GSK126	68210102
877	n1cnc(N)c(c12)c(Br)cn2[C@@H]([C@H](O)[C@@H]3O)O[C@@H]3CN(C(C)C)CCCNC(=O)Nc(cc4)ccc4C(C)(C)C	SGC0946	56962337
878	n1cnc(N)c(c12)ccn2[C@@H]([C@H](O)[C@@H]3O)O[C@@H]3CN(C(C)C)CCCNC(=O)Nc(cc4)ccc4C(C)(C)C	EPZ004777	56962336
879	n1cnc(N)c(c12)ncn2[C@@H]([C@H](O)[C@@H]3O)O[C@@H]3CN(C(C)C)[C@@H]4C[C@H](C4)CCc([nH]5)nc(c56)ccc(c6)C(C)(C)C	Pinometostat	57345410
880	CC(C)Oc(cc1)ccc1-c(c[nH]c2)c2CN(C)CCN	MS023	92136227
881	C1COCCC1CCO[C@@H]2C[C@@H](C2)Oc3ccc(cc3)-c4[nH]ncc4CN(C)CCNC	EPZ020411	91668547
882	c1cccc(c12)CCN(C2)C[C@@H](O)CNC(=O)c(c3)ccnc3NC4CCC4	GSK591	117072552
883	C1OCC1Nc2ncnc(c2)C(=O)NC[C@H](O)CN(C3)CCc(c34)cccc4	EPZ015666	90241673
884	O=C(C1)Nc(c12)cc(Cl)c(c2)C(=O)N[C@@H](C3)C[C@@H](CC4)N([C@H]34)S(=O)(=O)CC(CC5)CCN5CCCC(F)(F)F	EPZ031686	118946372
885	c1cc(Cl)c(Cl)cc1CCNCCC(=O)N(C2CCCCC2)CCNC[C@H](O)c3cccc(c34)NC(=O)CO4	A-893	91757965
886	C1CCCN1CCCNC(=O)c(cc(c2)C#N)cc2-c(cccc3)c3N(CC4)CCN4CCn5cc(C)c(c56)cccc6	LLY-507	91623361
887	c1cc(Cl)c(Cl)cc1CCNCCC(=O)N(C2CCCCC2)CCNCCc3ccc(O)c(c34)NC(=O)CO4	AZ-505	24961094
888	C1CNCc(c12)c(F)cc(c2)S(=O)(=O)N[C@@H](C(=O)N3CCCC3)Cc4cc(C(F)(F)F)ccc4	PFI-2	71300326
889	C1CCCN1CCCOc(c(c2)OC)cc(N=C3N)c2C34CCC4	A-366	76285486
890	C1CCCN1CCCOc(c(c2)OC)cc(c23)nc(C4CCCCC4)nc3NC(CC5)CCN5C(C)C	UNC0638	46224516
891	C1CN(C)CCCN1c(nc(c23)cc(OC)c(c3)OC)nc2NC(CC4)CCN4Cc5ccccc5	BIX01294	25150857
892	OP(=O)(O)OC[C@@H](O)[C@H](O)C(=O)C	1-deoxy-D-xylulose 5-phosphate	443201
893	c1cc(Cl)c(Cl)cc1[C@@H](P(=O)(O)O)CCN(O)C=O	34F	53245675
894	OP(=O)(O)CCCN(O)C(=O)C	FR-900098	162204
895	ON(C)C(=O)CS[C@H](P(=O)(O)O)c1ccccc1	1UQ	71737836
896	c1cc(Cl)c(Cl)cc1[C@@H](P(=O)(O)O)CCN(O)C(=O)c2ccccc2	FM6	71737809
897	ON(C)C(=O)C[C@H](CP(=O)(O)O)CCCc1ccc(C)cc1	LC50	121493980
898	ON(C)C(=O)C[C@H](CP(=O)(O)O)CCCc1cc(C)ccc1	LC56	121493983
899	ON(C)C(=O)C[C@H](CP(=O)(O)O)CCCc1ccc(C(F)(F)F)cc1	LC54	121493981
900	C1COCCN1CC	4-Ethylmorpholine	7525
901	ON(C)C(=O)C[C@H](CP(=O)(O)O)CCCc1cc(OC)ccc1	LC55	121493977
902	ON(C)C(=O)C[C@H](CP(=O)(O)O)CCCc1ccc(OC)cc1	LC52	121493976
903	ON(C)C(=O)C[C@H](CP(=O)(O)O)CCCc1cccc(c12)cccc2	LC51	121493975
904	ON(C)C(=O)C[C@@H](CP(=O)(O)O)c1ccc(C)cc1	RC134	91666472
905	ON(C)C(=O)C[C@H](CP(=O)(O)O)CCCc1ccccc1	RC176	91666469
906	c1cc(Cl)c(Cl)cc1[C@H](P(=O)(O)O)CCN(O)C(=O)C	DCV	52914871
907	OP(=O)(O)Cc1ncc(cc1)-c2ccccc2	BDBM50335493	50897581
908	OP(=O)(O)CCCN(O)C=O	Fosmidomycine	572
909	c1cc(Cl)cnc1NC(P(=O)(O)O)P(=O)(O)O	70010-82-1	405389
910	OC[C@@H](O)[C@@H](O)[C@@H](O)CNc1[nH]c(=O)[nH]c(=O)c1[N+]([O-])=O	RNO2P	446835
911	OC[C@@H](O)[C@@H](O)[C@@H](O)Cn1c(nc(=O)[nH]c2=O)c2nc(c13)cc(C)c(c3)N(C)C	Roseoflavin	49867612
912	OC[C@@H](O)[C@@H](O)[C@@H](O)Cn1c(=O)c(CCC(=O)O)nc(c12)c(=O)[nH]c(=O)[nH]2	Putidolumazine	185679
913	OC[C@@H](O)[C@@H](O)[C@@H](O)Cn1c(=O)c(=O)[nH]c(c12)c(=O)[nH]c(=O)[nH]2	DB02214	447426
914	O=C1NC(=S)NC(=O)C1=Cc(c(c23)cccc3)c(C)n2CCOc4c(C)cc(C)cc4	ZLDI-8	989566
915	Clc(c1)ccc(c12)oc(c2)C(=O)NC[C@]3(NC(=O)NC3=O)c(n4C)ncc4	Q27454018	86287516
916	c1cc(Cl)ccc1OCC(=O)NC[C@@]2(C)NC(=O)NC2=O	Q27454023	86287514
917	Clc(c1)ccc(c12)oc(c2)C(=O)NC[C@]3(NC(=O)NC3=O)c4sccn4	Q27454019	86287515
918	c1cccc(c12)C[C@@H](O)[C@H]2NC(=O)[C@@H]([C@@H](C(=O)NO)NCC3CC3)Cc4cc(O)ccc4	Q27449921	9954867
919	OC(=O)[C@@H](C(C)C)NS(=O)(=O)c1ccc(cc1)-c2ccc(cc2)COc(cc3)ccc3C(=O)C(C)C	Q27456853	11691964
920	c1cc(Cl)cc(Cl)c1COC(CC2)CCN2S(=O)(=O)C[C@@](C)(N(O)C=O)C[C@H](C)c3ncc(F)cn3	BDBM50337729	50990920
921	C1COCCC1(C(=O)NO)S(=O)(=O)c2ccc(cc2)Oc3ccc(C(F)(F)F)cc3	SC-77774	9933197
922	n1cc(F)cnc1[C@@H](C)C[C@](C)(N(O)C=O)CS(=O)(=O)N2CCC(CC2)CCc3c(C)onc3C	Q27464726	50990921
923	c1cccc(c12)C[C@@H](O)[C@H]2NC(=O)[C@@H](CC(=O)NO)Cc3cc(O)ccc3	BDBM50104965	11143173
924	c1cccc(c12)C[C@@H](O)[C@H]2NC(=O)[C@@H](CC(=O)NO)Cc3ccc(cc3)-c(c4)ccc(c45)OCO5	LA3	10005114
925	ONC(=O)CN(OC(C)C)S(=O)(=O)c1ccc(cc1)-c2ccccc2	ARP 100	10044321
926	ONC(=O)[C@@H](CSC1)N1S(=O)(=O)N2CCN(CC2)c3c(C)cc(C#N)cc3	Q27462716	117094707
927	c1ccccc1NC(=O)CCCCCCC(=O)NO	Vorinostat	5311
928	C1CC1S(=O)(=O)NC(=O)[C@@]2([C@@H](C2)C=C)NC(=O)[C@@H](N34)C[C@@H](C3)Oc5c(nc6c(n5)cc(OC)cc6)CCCCC[C@H]7[C@@H](C7)OC(=O)N[C@H](C4=O)C(C)(C)C	Grazoprevir	44603531
929	c1cc(C)c(Cl)cc1NC(=O)C(=O)NNC(=O)c2cc(OC)ccc2	SR-01000358442	3117694
930	CNC(=O)[C@H](C(C)(C)C)NC(=O)[C@@H]([C@H](C)N(O)C=O)CCCc1ccccc1	GI254023X	9952396
931	C1CC12C[C@H](C(=O)NO)[C@H](N(C2)C(=O)OC)C(=O)N3CCN(CC3)c4ccccc4	Aderbasib	16070111
932	C1CC12C[C@H](C(=O)NO)[C@H](N(C2)C(=O)OC)C(=O)N3CCC(=CC3)c4ccccc4	INCB-3619	11625778
933	c1ccoc1C(=O)N[C@@H](CC(C)C)C(=O)N([C@@H](C2)C(=O)O)CC(=C23)N=C4C3=CC=CC4	POL656	23586183
934	c1ccoc1C(=O)N[C@@H](CC(C)C)C(=O)N[C@H](C(=O)O)CC=2CN=c(c23)cccc3	POL647	23586131
935	n1c(N)[nH]c(=O)c(n2)c1nc(c23)O[C@@H](C(S)=C3S)COP(=O)(O)OP(=O)(O)OC[C@H]4O[C@H]([C@H](O)[C@@H]4O)n5ccc(N)nc5=O	Pterin Cytosine Dinucleotide	135509118
936	c1cccc(c12)nc(o2)[C@@H](O)[C@H](CCCCN)NC(=O)[C@H](CCc3ccccc3)NC(=O)[C@H](CCCCN)NC(=O)OCc4ccccc4	Q27458218	44629721
937	OC(=O)c(cc1)ccc1N=C(N)N	4-GUANIDINOBENZOIC ACID	159772
938	CN(C)C(=O)COC(=O)Cc1ccc(cc1)OC(=O)c2ccc(cc2)N=C(N)N	Camostat	2536
939	[H]/N=C(\N)c1ccccc1	Benzamidine	2332
940	c1cccc(c12)nc(o2)[C@@H](O)[C@H](CCCCN)NC(=O)[C@@H]3C[C@@H](OCc4ccc(C)cc4)CN3C(=O)[C@@H](CCc5ccccc5)NC(=O)OCc6ccccc6	B3C
941	c1ccccc1COC(=O)NC(CC(C)C)C(=O)NC(CC)C(=O)C(=O)NCCCN2CCOCC2	Vasolex	349974984
942	C1COCCN1CCCNC(=O)C(=O)C(CC)NC(=O)[C@H](CC(C)C)NC(=O)OCc2ccccc2	AK-295	183798
943	c1cc(F)ccc1S(=O)(=O)N[C@@H](C(C)C)C(=O)N[C@H](C=O)CC(C)C	SJA6017	9885817
944	OC(=O)CC(CN)C(C(C)C)NC(=O)CCC(=O)NC(CC(C)C)C(=O)NC(C=O)CCCNC(N)=N	Gabadur
945	c1ccccc1CC(C(=O)C(=O)N)NC(=O)c2cccnc2-n3ccc(n3)-c4ccc(F)cc4	A-953227
946	C1CC1c2cc(Cl)c(cc2)S(=O)(=O)Nc3cc(C(=O)NC(C)(C)C)ccc3Oc4c(Cl)cc(c(F)c4)CC(=O)O	Vidupiprant	42641863
947	c1ccccc1C[C@H](C(=O)C(=O)N)NC(=O)c2c(cccc2)\C=C\c(cc3)ccc3CN(CC)CC	A-705253	9848148
948	c1ccccc1C[C@@H](C=O)NC(=O)[C@H](C(C)C)NC(=O)OCc2ccccc2	MDL-28170	72430
949	c1ccccc1CN2[C@H](CCC2=O)C(=O)N[C@H](C(=O)C(=O)NC3CC3)Cc4ccccc4	Alicapistat	67095330
950	OC(=O)C[C@H](NC(=O)C)C(=O)N1[C@@H](CCC1)C(=O)N[C@@H](CCSC)C(=O)N[C@@H](CO)C(=O)N[C@@H](CO)C(=O)N[C@@H]([C@H](O)C)C(=O)N[C@@H](Cc2ccc(O)cc2)C(=O)N[C@@H]([C@@H](C)CC)C(=O)N[C@@H](CCC(=O)O)C(=O)N[C@@H](CCC(=O)O)C(=O)N[C@@H](CC(C)C)C(=O)NCC(=O)N[C@@H](CCCCN)C(=O)N[C@@H](CCCN\C(N)=N\[H])C(=O)N[C@@H](CCC(=O)O)C(=O)N[C@@H](C(C)C)C(=O)N[C@@H]([C@H](O)C)C(=O)N[C@@H]([C@@H](C)CC)C(=O)N3[C@@H](CCC3)C(=O)N4[…	Calpastatin	90488788
951	OC(=O)C(\S)=C\c1c[nH]c(c12)ccc(F)c2	PD151746	5353866
952	c1cc(I)ccc1/C=C(\S)C(=O)O	PD150606	9839500
953	c1ccccc1S(=O)(=O)N[C@@H](CC(C)C)C(=O)N[C@@H](C(C)C)[C@@H](O)c2c(c2=O)-c3ccccc3	BDA-410	24815760
954	c1ccccc1C[C@H](NC(=O)CCC)C(=O)N[C@@H](CCC(=O)O)C(=O)N[C@H](C(=O)N[C@@H](CCC(=O)O)C(=O)N[C@H](C2=O)CC[C@H]3O)[C@@H](C)OC(=O)[C@H]([C@@H](C)CC)NC(=O)[C@@H](N(C)C(=O)[C@@H](N23)C(C)C)Cc4ccccc4	Micropeptin 88B	44448260
955	O[C@@H]1CC[C@@H](C2=O)NC(=O)[C@H](CCCCN)NC(=O)[C@@H](NC(=O)[C@H](CC(=O)O)NC(=O)CCCCC)[C@@H](C)OC(=O)[C@H](C(C)C)NC(=O)[C@@H](N(C)C(=O)[C@@H](N12)[C@@H](C)CC)Cc3ccc(O)cc3	Micropeptin SD944	10581711
956	O[C@@H](N12)CC[C@@H](C2=O)NC(=O)[C@H](CCCN=C(N)N)NC(=O)[C@@H](NC(=O)[C@@H](NC(=O)C)CC(=O)O)[C@@H](C)OC(=O)[C@H]([C@@H](C)CC)NC(=O)[C@H](Cc3ccc(O)cc3)N(C)C(=O)[C@@H]1Cc4ccccc4	Micropeptin EI964	11136804
957	O[C@@H](N12)CC[C@@H](C2=O)NC(=O)[C@H](CCCN=C(N)N)NC(=O)[C@@H](NC(=O)[C@H](CC(=O)O)NC(=O)CCC)[C@@H](C)OC(=O)[C@H]([C@@H](C)CC)NC(=O)[C@H](Cc3ccc(O)cc3)N(C)C(=O)[C@@H]1Cc4ccccc4	Micropeptin EI992	10996701
958	OC(N12)CCC(C2=O)NC(=O)C(CCCN=C(N)N)NC(=O)[C@@H](NC(=O)C(O)COS(=O)(=O)O)[C@@H](C)OC(=O)C(C(C)C)NC(=O)C(Cc3ccc(O)cc3)N(C)C(=O)[C@@H]1Cc4ccccc4	Micropeptin 90	15237049
959	OC1CCC(C2=O)NC(=O)C(CCCN=C(N)N)NC(=O)C(NC(=O)C(O)COS(=O)(=O)O)C(C)OC(=O)C(C(C)CC)NC(=O)C(N(C)C(=O)C(N12)C(C)CC)Cc3ccccc3	Cyanopeptolin S	23724558
960	O[C@@H]1CC[C@@H](C2=O)NC(=O)[C@H](CCCN=C(N)N)NC(=O)[C@@H](NC(=O)[C@H](CC(=O)O)NC(=O)CCCCC)[C@@H](C)OC(=O)[C@H](C(C)C)NC(=O)[C@@H](N(C)C(=O)[C@@H](N12)[C@@H](C)CC)Cc3c[nH]c(c34)cccc4	Micropeptin SF995	10606009
961	O[C@@H](N12)CC[C@@H](C2=O)NC(=O)[C@H](CCCCN)NC(=O)[C@@H](NC(=O)[C@H](CCC(=O)O)NC(=O)CCCCC)[C@@H](C)OC(=O)[C@H](C(C)C)NC(=O)[C@H](Cc3c[nH]c(c34)cccc4)N(C)C(=O)[C@@H]1Cc5ccccc5	Micropeptin T2	44448155
962	CCCCCCCC(=O)N[C@@H](CCC(=O)O)C(=O)N[C@H](C(=O)N[C@@H](CCCCN)C(=O)N[C@H](C1=O)CC[C@H]2O)[C@@H](C)OC(=O)[C@H](C(C)C)NC(=O)[C@@H](N(C)C(=O)[C@@H](N12)CC(C)C)Cc3ccc(O)cc3	Micropeptin A	45268664
963	c1cc(O)ccc1C[C@H](N(C)C(=O)[C@@H](N23)[C@@H](C)CC)C(=O)N[C@@H]([C@@H](C)CC)C(=O)O[C@@H]4[C@H](N(CC4C)C(=O)[C@@H](NC(=O)CC)CCC(=O)N)C(=O)N[C@@H](CC(C)C)C(=O)N[C@H](C3=O)CC[C@H]2O	Nostopeptin D	44448172
964	c1cc(O)c(Br)cc1C[C@H](N(C)C(=O)[C@@H]2[C@@H](O)C)C(=O)N[C@@H](C(C)C)C(=O)O[C@H](C)[C@@H](C(=O)N[C@H](C(=O)N[C@H](C3=O)CC[C@H](N23)O)CCc4ccc(O)cc4)NC(=O)[C@H](C(C)C)NC(=O)[C@H](C)NC(=O)[C@@H](NC(=O)[C@H](O)CO)CCCc5ccc(O)cc5	Largamide G	70678755
965	CCCC(=O)N[C@@H](CC(C)C)C(=O)N[C@@H](CCC(=O)O)C(=O)N[C@H](C(=O)N[C@H](C(=O)N[C@H](C1=O)CC[C@H]2O)Cc3ccc(O)cc3)[C@@H](C)OC(=O)[C@H]([C@@H](C)CC)NC(=O)[C@@H](N(C)C(=O)[C@@H](N12)C(C)C)Cc4ccccc4	Micropeptin 88N	44448214
966	N12[C@H](O)CC[C@@H](C1=O)NC(=O)[C@H](CC(C)C)NC(=O)[C@@H](NC(=O)[C@H](CCC(=O)N)NC(=O)[C@H]3NC(=O)CC3)[C@@H](C)OC(=O)[C@H]([C@@H](C)CC)NC(=O)[C@@H](N(C)C(=O)[C@@H]2[C@H](O)C)Cc4ccc(cc4)OC	Planktopeptin BL843	103562568
967	c1cc(O)c(Cl)cc1C[C@H](N(C)C(=O)[C@@H]2[C@@H](O)C)C(=O)N[C@@H](C(C)C)C(=O)O[C@H](C)[C@@H](C(=O)N[C@@H](CC(C)C)C(=O)N[C@H](C3=O)CC[C@H](N23)O)NC(=O)[C@H](C(C)C)NC(=O)[C@H](C)NC(=O)[C@@H](NC(=O)[C@H](O)CO)CCCc4ccc(O)cc4	Largamide E	70678759
968	c1cc(O)c(Br)cc1C[C@H](N(C)C(=O)[C@@H]2[C@@H](O)C)C(=O)N[C@@H](C(C)C)C(=O)O[C@H](C)[C@@H](C(=O)N[C@@H](CC(C)C)C(=O)N[C@H](C3=O)CC[C@H](N23)O)NC(=O)[C@H](C(C)C)NC(=O)[C@H](C)NC(=O)[C@@H](NC(=O)[C@H](O)CO)CCCc4ccc(O)cc4	Largamide D	70678743
969	c1ccccc1C[C@H](NC(=O)CCC)C(=O)N[C@@H](CCC(=O)O)C(=O)N[C@H](C(=O)N[C@@H](CC2CCC(O)C=C2)C(=O)N[C@H](C3=O)CC[C@H]4O)[C@@H](C)OC(=O)[C@H]([C@@H](C)CC)NC(=O)[C@@H](N(C)C(=O)[C@@H](N34)C(C)C)Cc5ccccc5	Micropeptin 88D	44448247
970	c1ccccc1C[C@H](NC(=O)CCC)C(=O)N[C@@H](CCC(=O)O)C(=O)N[C@H](C(=O)N[C@@H](CC(C)C)C(=O)N[C@H](C2=O)CC[C@H]3O)[C@@H](C)OC(=O)[C@H]([C@@H](C)CC)NC(=O)[C@@H](N(C)C(=O)[C@@H](N23)C(C)C)Cc4ccccc4	Micropeptin 88E	44448246
971	c1ccccc1C[C@H](NC(=O)CCC)C(=O)N[C@@H](CCC(=O)O)C(=O)N[C@H](C(=O)N[C@H](C(=O)N[C@H](C2=O)CC[C@H]3O)Cc4ccc(O)cc4)[C@@H](C)OC(=O)[C@H]([C@@H](C)CC)NC(=O)[C@@H](N(C)C(=O)[C@@H](N23)C(C)C)Cc5ccccc5	Micropeptin 88C	44448259
972	O[C@@H]1CC[C@@H](C2=O)NC(=O)[C@H](CCC(=O)N)NC(=O)[C@@H](NC(=O)[C@@H](O)Cc3ccc(O)cc3)[C@@H](C)OC(=O)[C@H]([C@@H](C)CC)NC(=O)[C@@H](N(C)C(=O)[C@@H](N12)CC(C)C)Cc4ccc(O)cc4	Micropeptin SF909	10724444
973	c1cc(O)ccc1C[C@H](N(C)C(=O)[C@@H](N23)CC(C)C)C(=O)N[C@@H]([C@@H](C)CC)C(=O)O[C@@H]4[C@H](N(CC4C)C(=O)[C@@H](NC(=O)C)CCC(=O)N)C(=O)N[C@@H](CC(C)C)C(=O)N[C@H](C3=O)CC[C@H]2OC	Nostopeptin F	44448285
974	c1cc(O)ccc1C[C@H](N(C)C(=O)[C@@H](N23)CC(C)C)C(=O)N[C@@H]([C@@H](C)CC)C(=O)O[C@@H]4[C@H](N(CC4C)C(=O)[C@@H](NC(=O)C)CCC(=O)N)C(=O)N[C@@H](CC(C)C)C(=O)N[C@H](C3=O)CC[C@H]2O	Nostopeptin E	44448099
975	c1cc(OC)ccc1C[C@H](N(C)C(=O)[C@@H](N23)CC(C)C)C(=O)N[C@@H]([C@@H](C)CC)C(=O)O[C@@H]4[C@H](N(CC4C)C(=O)[C@@H](NC(=O)C)CCC(=O)N)C(=O)N[C@@H](CC(C)C)C(=O)N[C@H](C3=O)CC[C@H]2O	Nostopeptin I	44448102
976	c1cc(OC)ccc1C[C@H](N(C)C(=O)[C@@H](N23)CC(C)C)C(=O)N[C@@H]([C@@H](C)CC)C(=O)O[C@@H]4[C@H](N(CC4C)C(=O)[C@@H](NC(=O)C)CCC(=O)N)C(=O)N[C@@H](CC(C)C)C(=O)N[C@H](C3=O)CC[C@H]2OC	Nostopeptin J	44448114
977	O[C@@H]1CC[C@@H](C2=O)NC(=O)[C@H](Cc3ccc(O)cc3)NC(=O)[C@@H](NC(=O)[C@H](CC(=O)O)NC(=O)CCCCC)[C@@H](C)OC(=O)[C@H](C(C)C)NC(=O)[C@@H](N(C)C(=O)[C@@H](N12)[C@@H](C)CC)Cc4c[nH]c(c45)cccc5	Micropeptin SD1002	10581850
978	c1ccccc1C[C@H](NC(=O)CCC)C(=O)N[C@@H](CCC(=O)OC)C(=O)N[C@H](C(=O)N[C@H](C(=O)N[C@H](C2=O)CC[C@H]3O)Cc4ccc(O)cc4)[C@@H](C)OC(=O)[C@H]([C@@H](C)CC)NC(=O)[C@@H](N(C)C(=O)[C@@H](N23)C(C)C)Cc5ccccc5	Micropeptin 88F	44448127
979	N12[C@H](O)CC[C@@H](C1=O)NC(=O)[C@H](Cc3ccc(O)cc3)NC(=O)[C@@H](NC(=O)[C@H](CCC(=O)N)NC(=O)CCCCC)[C@@H](C)OC(=O)[C@H](C(C)C)NC(=O)[C@H](Cc4ccc(O)cc4)N(C)C(=O)[C@@H]2Cc5ccccc5	Micropeptin T1	103562359
980	CO[C@@H]1CC[C@@H](C2=O)NC(=O)[C@H](CC3CC[C@@H](O)C=C3)NC(=O)[C@@H](NC(=O)[C@H](NC(=O)[C@H](OC)CO)CCc4ccc(O)cc4)[C@@H](C)OC(=O)[C@H](C(C)CC)NC(=O)[C@@H](N(C)C(=O)[C@@H](N12)C(C)CC)Cc5ccccc5	Oscillapeptin C	100964533
981	c1cc(O)ccc1CC[C@@H](C(=O)N[C@H](C2=O)CC[C@H]3O)NC(=O)[C@@H](NC(=O)[C@H](NC(=O)[C@H](OC)COS(=O)(=O)O)CCc4ccc(O)cc4)[C@@H](C)OC(=O)[C@H]([C@H](C)CC)NC(=O)[C@@H](N(C)C(=O)[C@@H](N23)[C@@H](C)CC)Cc5ccccc5	Oscillapeptin E	44448153
982	O[C@@H]1CC[C@@H](C2=O)NC(=O)[C@H](Cc3ccc(O)cc3)NC(=O)[C@@H](NC(=O)[C@H](CC(=O)O)NC(=O)CCCCC)[C@@H](C)OC(=O)[C@H](C(C)C)NC(=O)[C@@H](N(C)C(=O)[C@@H](N12)[C@@H](C)CC)Cc4ccc(O)cc4	Micropeptin SD979	10748485
983	OC[C@H](O)C(=O)N[C@@H](C(C)C)C(=O)N[C@@H](CCC(=O)N)C(=O)N[C@H](C(=O)N[C@@H](CC(C)C)C(=O)N[C@H](C1=O)CC[C@H](N12)O)[C@@H](C)OC(=O)[C@H]([C@@H](C)CC)NC(=O)[C@@H](N(C)C(=O)[C@@H]2[C@H](O)C)Cc3ccc(cc3)OC	Planktopeptin BL1061	386979252
984	c1cc(O)ccc1CC[C@@H](C(=O)N[C@H](C2=O)CC[C@H]3O)NC(=O)[C@@H](NC(=O)[C@@H](NC(=O)[C@H](OC)COS(=O)(=O)O)CCc4ccc(O)cc4)[C@@H](C)OC(=O)[C@H]([C@H](C)CC)NC(=O)[C@@H](N(C)C(=O)[C@@H](N23)[C@@H](C)CC)Cc5ccc(OC)cc5	Oscillapeptin A	44448170
985	c1cc(O)ccc1CC[C@H](NC(=O)[C@H](OC)COS(=O)(=O)O)C(=O)N[C@H](C(=O)N[C@@H](C[C@@H]2CC[C@@H](O)C=C2)C(=O)N[C@H](C3=O)CC[C@H]4O)[C@@H](C)OC(=O)[C@H]([C@@H](C)CC)NC(=O)[C@@H](N(C)C(=O)[C@@H](N34)[C@@H](C)CC)Cc5ccccc5	Oscillapeptin D	45271172
986	c1cc(O)c(C)cc1CC[C@@H](C(=O)N[C@H](C2=O)CC[C@H]3O)NC(=O)[C@@H](NC(=O)[C@@H](NC(=O)[C@H](OC)COS(=O)(=O)O)CCc4ccc(O)cc4)[C@@H](C)OC(=O)[C@H]([C@@H](C)CC)NC(=O)[C@@H](N(C)C(=O)[C@@H](N23)[C@@H](C)CC)Cc5ccc(OC)cc5	Oscillapeptin B	10843931
987	c1cc(O)ccc1C[C@H](N(C)C(=O)[C@@H](N23)[C@@H](C)CC)C(=O)N[C@@H]([C@@H](C)CC)C(=O)OC4C(N(CC4C)C(=O)[C@@H](NC(=O)C)CCC(=O)N)C(=O)N[C@@H](CC(C)C)C(=O)NC(C3=O)CCC2O	Nostopeptin B	10653394
988	c1cc(O)ccc1C[C@H](N(C)C(=O)[C@@H](N23)[C@@H](C)CC)C(=O)N[C@@H]([C@@H](C)CC)C(=O)OC4C(N(CC4C)C(=O)[C@H](CCC(=O)N)NC(=O)CCC)C(=O)N[C@@H](CC(C)C)C(=O)NC(C3=O)CCC2O	Nostopeptin A	10581739
989	c1cc(O)ccc1C[C@H](NC(=O)C)C(=O)N[C@@H](CCC(=O)O)C(=O)N[C@H](C(=O)N[C@H](C(=O)N[C@H](C2=O)CC[C@H]3O)Cc4ccc(O)cc4)[C@@H](C)OC(=O)[C@H]([C@@H](C)CC)NC(=O)[C@@H](N(C)C(=O)[C@@H](N23)C(C)C)Cc5ccccc5	Micropeptin 88Y	44448284
990	CCCCCC(=O)NCC(=O)N[C@@H]([C@H](O)C)C(=O)N[C@H](C(=O)N[C@@H](CCC(=O)N)C(=O)N[C@H](C1=O)CC[C@H](N12)O)[C@@H](C)OC(=O)[C@H](C(C)C)NC(=O)[C@H](Cc3c[nH]c(c34)cccc4)N(C)C(=O)[C@@H]2Cc5ccccc5	Micropeptin 103	10441103
991	O[C@@H]1CC[C@@H](C2=O)NC(=O)[C@H](Cc3ccc(O)cc3)NC(=O)[C@@H](NC(=O)[C@H](CC(=O)O)NC(=O)CCCCC)[C@@H](C)OC(=O)[C@H](C(C)C)NC(=O)[C@@H](N(C)C(=O)[C@@H](N12)CC(C)C)Cc4ccccc4	Cyanopeptolin 963A	11193939
992	c1cc(O)ccc1CC[C@H](NC(=O)[C@@H](O)CO)C(=O)N[C@@H](CCC(=O)N)C(=O)N[C@H](C(=O)N[C@@H](CC(C)C)C(=O)N[C@H](C2=O)CC[C@H](N23)O)[C@@H](C)OC(=O)[C@H]([C@@H](C)CC)NC(=O)[C@@H](N(C)C(=O)[C@@H]3[C@H](O)C)Cc4ccc(OC)cc4	Planktopeptin BL1125	44448116
993	O[C@@H]1CC[C@@H](C2=O)/N=C(\[O-])[C@H](Cc3ccccc3)NC(=O)[C@@H](NC(=O)[C@@H](O)COP(=O)(O)O)[C@@H](C)OC(=O)[C@H]([C@@H](C)CC)NC(=O)[C@H](Cc4ccc([O-])cc4)N(C)C(=O)[C@@H](N12)Cc5ccccc5.[Na+].[Na+]	Micropeptin T-20	100960361
994	O[C@@H]1CC[C@@H](C2=O)NC(=O)[C@H](CC3CCC(O)C=C3)NC(=O)[C@@H](NC(=O)[C@@H](N)CCC(=O)O)[C@@H](C)OC(=O)[C@H]([C@@H](C)CC)NC(=O)[C@@H](N(C)C(=O)[C@@H](N12)C(C)C)Cc4ccccc4	Micropeptin	10996701
995	OS(=O)(=O)OC[C@@H](O)C(=O)N[C@@H](C)C(=O)N[C@@H](CCc1ccc(O)cc1)C(=O)N[C@H](C(=O)N/C(=C\C)C(=O)N[C@H](C2=O)CC[C@H](N23)O)[C@@H](C)OC(=O)[C@H](C(C)C)NC(=O)[C@H](Cc4ccc(O)cc4)N(C)C(=O)[C@@H]3Cc5ccccc5	Lyngbyastatin 4	16104920
996	O[C@@H](N12)CC[C@@H](C2=O)NC(=O)[C@H](CC(C)C)NC(=O)[C@@H](NC(=O)[C@@H](NC(=O)C)CCC(=O)N)[C@@H](C)OC(=O)[C@H](C(C)C)NC(=O)[C@H](Cc3ccc(O)cc3)N(C)C(=O)[C@@H]1Cc4ccccc4	Nostopeptin	177999
997	O[C@@H]1CC[C@@H](C2=O)NC(=O)[C@H](Cc3ccc(O)cc3)NC(=O)[C@@H](NC(=O)[C@H](CC(=O)O)NC(=O)CCCCC)[C@@H](C)OC(=O)[C@H](C(C)C)NC(=O)[C@@H](N(C)C(=O)[C@@H](N12)CC(C)C)Cc4ccccc4	Cyanopeptolin	11193939
998	c1cc(OC)c(Br)cc1C[C@H](N(C)C(=O)[C@@H](N23)[C@@H](C)CC)C(=O)N[C@@H](C(C)C)C(=O)O[C@H](C)[C@H](NC(=O)[C@H](CCC(=O)N)NC(=O)CCC)C(=O)N[C@@H](CCCNC(=O)N)C(=O)N[C@H](C3=O)CC[C@H]2O	Symplocamide A	44448139
999	O[C@@H]1CC[C@@H](C2=O)NC(=O)[C@H](CCCNC(=N)N)NC(=O)[C@@H](NC(=O)[C@@H](CC(C)C)NC(=O)[C@H](O)COS(=O)(=O)O)[C@@H](C)OC(=O)[C@H](C(C)C)NC(=O)[C@@H](N(C)C(=O)[C@@H](N12)CC(C)C)Cc3ccc(O)cc3	A90720A	7885608
1000	c1ccccc1OCCNS(=O)(=O)c(cc2)ccc2-n3n(C)c(C)c(c3=O)C(C)C	BC-LI-0186	4917788
1001	c1cccnc1-c2nc(sc2)NC(=C)c3sc(Cl)cc3	IMB-T130
1002	O=c1[nH]c(=O)n(C)c(c12)nc(n2CCC)SCCOc3ccc(cc3)C(=O)O	BAS 00844032	3977752
1003	c1cc(C)ccc1CSc(nc(c23)n(C)c(=O)[nH]c3=O)n2CC(O)COc4c(C)cccc4	BAS 02073022	4030443
1004	c1cc(Cl)ccc1OCC(O)Cn2c(SC(C)CC)nc(c23)n(C)c(=O)[nH]c3=O	BAS 00458066	3938318
1005	Brc(c1)ccc(O)c1\C=N\Nc(n2CCO)nc(c23)n(C)c(=O)[nH]c3=O	BAS 00390309	3928466
1006	c1cc(Cl)ccc1OC[C@H](O)Cn2c(SCC)nc(c23)n(C)c(=O)[nH]c3=O	BAS 00458062	3107957
1007	OCCn1c(C)ncc1[N+]([O-])=O	Metronidazole	4173
1008	c1cc(O)ccc1C[C@H](N)CO[P@](=O)(O)OC[C@H]([C@@H](O)[C@H]2O)O[C@H]2n3cnc(c34)c(N)ncn4	Tyrosinyl adenylate	169008
1009	O[C@@H]1[C@@H](N(C)C)C[C@@H](C)O[C@H]1O[C@@H]([C@]2(C)OC)[C@@H](C)[C@H](OC(=O)Cc3ccc([N+]([O-])=O)cc3)[C@@H](C)C(=O)O[C@H](CC)[C@](O)(C)[C@H](O)[C@@H](C)C(=O)[C@@H](C2)C	TEA-0777	12015777
1010	c1cc(O)c(OC)cc1CNC(=O)CCCC/C=C/C(C)C	Capsaicin	1548943
1011	O[C@H]1[C@H](OC2)N(O)[C@H]([C@H](O)[C@@]12O)[C@@H](C(=O)O)NC(=O)[C@@H](N)Cc3ccc(O)cc3	SB-219383	446497
1012	N=C(N)c1ccc(cc1)NC(=O)c2c(ccc(c2)OC)NCc3cc(CO)cc(OC(C)C)c3OCC(=O)O	AS1924269-00
1013	CCOC(=O)\N=C(N)\c1ccc(cc1)NC(=O)c2c(ccc(c2)OC)NCc3cc(CO)cc(OC(C)C)c3OCC(=O)O	AS1937090-FO
1014	CCOC(=O)\N=C(N)\c1ccc(cc1)NC(=O)c2c(ccc(c2)OC)NCc3cc(CO)cc(OC(C)C)c3OCC(=O)OCC	AS1932804-00
1015	c1cnc(N)c(c12)ccc(c2)N[C@@H](C(=O)N(C3)C)c(cc4)cc(C)c4[C@@H](C)COC(=O)Nc(c5)ccc(c35)C6(CC6)c7n[nH]nn7	70A	118098670
1016	c1cc(C(N)=N)ccc1NC(c2c(F)c(cc(c2)OC)OCCO)c3[nH]c(=O)n(n3)-c4ncccn4	ER-410660
1017	CC(C)CNC(=O)c(cc1)cc(C(=O)O)c1-c2c(cc(cc2)C=C)CNc3ncc(cc3)C(\N)=N\[H]	BCX-3607	9912630
1018	OC(=O)C[C@@H](C(=O)O)NC(=O)Cc(c1)cc(-c2cc(S(=O)(=O)N)ccc2O)c(O)c1-c([nH]3)nc(c34)ccc(c4)C(\N)=N\[H]	PCI-27483	135425273
1019	OC(=O)c(cc1)ccc1-c(cc(O)c(c2)OC)c2[C@@H]3Nc(ccc(c4)C(\N)=N\[H])c4[C@H]([C@H]35)c6c(C5)cccc6	BMS-593214	69249482
1020	Nc1ncc(F)c(c12)cc([N+]([O-])=O)cc2	SCHEMBL16306980	69249482
1021	F[C@H]1[C@@H](OC)NC(=O)c(c12)ccc([N+]([O-])=O)c2	SCHEMBL16294897	117740417
1022	Fc1c[nH]c(=O)c(c12)ccc([N+]([O-])=O)c2	SCHEMBL16293438	117739242
1023	Fc1cnc(Cl)c(c12)ccc([N+]([O-])=O)c2	SCHEMBL16293290	117739138
1024	c1cnc(N)c(c12)ccc(c2)N[C@@H](C(=O)N(C3)C)c(cc4)cc(C)c4[C@@H](C)COC(=O)Nc(c5)ccc(c35)C6(CC6)c7n[nH]nn7	SCHEMBL16744585	118098670
1025	CC(C)S(=O)(=O)c(c12)ccc(c2)NC(=O)OCCc3c(CC)cc(cc3)[C@H](C(=O)N(C1)C)Nc4cc(C(=O)N)ccc4	82J	57842830
1026	c1cc(Br)cc(C)c1CC(=O)O	SCHEMBL5985	19026052
1027	c1cc(Br)cc(C)c1CC=C	SCHEMBL8165898	53403156
1028	CC(C)(C)OC(=O)N(C(=O)OC(C)(C)C)c1cccc(c12)cc(cc2)NC(C(=O)O)c3cc(C)c(cc3)CCOC(=O)Nc4cc(CN)ccc4	SCHEMBL4707977	57842592
1029	c1cc(Br)cc(C)c1CCOC(=O)Nc2cc(C#N)ccc2	SCHEMBL3867049	57842847
1030	NC(=N)c1ccc(cc1)/C=C2/N=C(OC2=O)c3ccccc3	UK122
1031	Clc1ccc(cc1Cl)NC(=O)c2ccc(cc2)CNc3c(C(=O)O)cccc3	AR-H029953XX
1032	FC(F)(F)Oc(cc1)ccc1-c(cc2)cc(c23)c(C(=O)C(=O)O)cn3Cc4ccccc4	PAI-039	6450819
1033	c1cc(Cl)cc(C(=O)O)c1NC(=O)COCC(=O)N(CC2)CCN2C(c3ccccc3)c4ccccc4	TM5275	25174437
1034	CN(C)CCSc(cc1)sc1/C=c2\[nH]c(=O)c(\[nH]c2=O)=C\c3ccccc3	XR5118	9932718
1035	c1ccccc1/C=c(\[nH]c2=O)c(=O)[nH]/c2=C\c3ccc(OC)cc3	XR-334	9797139
1036	CN(C)CCOc(cc1)ccc1/C=c2\[nH]c(=O)c(\[nH]c2=O)=C/c3ccccc3	XR-1853	6439506
1037	c1ccccc1/C=c(c2=O)\[nH]c(=O)c(\n2C)=C\c3ccc(OC)cc3	XR-330	9819057
1038	c1cccc(c2on3)c1C(=O)c(c2c34)c(Nc5cc(C(=O)O)ccc5)cc4N6CCCCCC6	IPR-803	3675673
1039	c1ccc(O)c(c12)nc(cc2)Nc3ncccc3	TCMDC-125567	1380879
1040	OC(C)(C)[C@@H](O)Cc(c1OC)c(OC)cc(c12)oc(=O)cc2	Toddalolactone	5321961
1041	Oc1cc(O)cc(c12)O[C@H](c3cc(O)c(O)c(O)c3)[C@@H](C2)OC(=O)c4cc(O)c(O)c(O)c4	Epigallocatechin gallate	65064
1042	CC(C)c1cc(C(C)C)cc(C(C)C)c1S(=O)(=O)N[C@@H](Cc2cc(ccc2)C(/N)=N\O)C(=O)N3CCN(CC3)C(=O)OCC	Upamostat	9852201
1043	c1ccccc1COC(=O)N[C@H](Cc2ccccc2)P(=O)(O)C[C@@H](CCCc3ccccc3)C(=O)N[C@H](C(=O)N)Cc4c[nH]c(c45)cccc5	RXP03	446143
1044	O=C1N/C(C(\[C@H]1C)=C/C)=C\c(c2C)[nH]c(c2CCC(=O)O)/C=c(c3CCC(=O)O)\[nH]/c(c3C)=C\C4=NC(=O)C(=C4C)CC	PHYCOCYANOBILIN	5460417
1045	[H]/N=C(N)/N1CC(=CC1)CCNC(=O)[C@H](C2)N([C@H]([C@H]23)C[C@H](O)CC3)C(=O)[C@@H](Cc4ccccc4)NC(=O)[C@H](O)Cc5ccccc5	Oscillarin	5289082
1046	[O-]S(=O)(=O)OC[C@@H](OC)C(=O)N[C@H](CC(C)C)C(=O)N([C@H]([C@H]12)C[C@H](O)[C@@H](O)C2)[C@@H](C1)C(=O)NCCC(=CC3)C[N+]3=C(N)N	Dysinosin A	10439038
1047	[O-]S(=O)(=O)OC[C@@H](OC)C(=O)N[C@H]([C@H](Cl)C(C)C)C(=O)N([C@H]([C@H]12)C[C@H](O)[C@@H](O)C2)[C@@H](C1)C(=O)NCCC(=CC3)C[N+]3=C(N)N	Chlorodysinosin A	16079152
1048	c1cc(O)ccc1C[C@@H](O)C(=O)N[C@H](CCc2ccc(O)cc2)C(=O)N3[C@@H](C[C@@H](C3)C)C(=O)NC(CO)CCCN=C(N)N	SPUMIGIN A	10651408
1049	NCCCC[C@H](C(=O)O)N(C)C(=O)[C@H](C[C@@H](C1)C)N1C(=O)[C@@H](CCc2ccc(O)cc2)NC(=O)[C@H](O)Cc3ccc(O)cc3	Spumigin J	71458275
1050	Oc1c(O)c(O)cc(c12)oc(cc2=O)-c3ccc(O)cc3	Scutellarein	5281697
1051	O[C@@H]1[C@@H](C(=O)O)O[C@H]([C@H](O)[C@H]1O)Oc(c2)c(O)c(O)c(c23)c(=O)cc(o3)-c4ccc(O)cc4	Scutellarin	185617
1052	Oc1cc(O)cc(c12)oc(c(O)c2=O)-c3cc(O)c(O)c(O)c3	Myricetin	5281672
1053	c1nnnn1-c(ccc(Cl)c2)c2CNC(=O)[C@@H]3CC=NN3C(=O)[C@H](OC(=O)CC)c4ccc(F)cc4	AZD8165	44548240
1054	c1ccc(F)cc1-c(cc2)cnc2\C=C\[C@@H]3[C@H]([C@@H](C)OC4=O)[C@H]4C[C@@H]([C@H]35)C[C@@H](CC5)NC(=O)OCC	Vorapaxar	10077130
1055	C1CCCCC1[C@@H](NCC(=O)OCC)C(=O)N2[C@@H](CC2)C(=O)NCc3ccc(cc3)C(\N)=N\O	Ximelagatran	9574101
1056	C1CCCCC1[C@@H](NCC(=O)O)C(=O)N2[C@@H](CC2)C(=O)NCc3ccc(cc3)C(\N)=N\[H]	Melagatran	183797
1057	C1CCCCC1C[C@@H](NCC(=O)O)C(=O)N2[C@@H](CCCC2)C(=O)NCCCN=C(N)N	Inogatran	66005
1058	C1C[C@@H](C)C[C@H](C(=O)O)N1C(=O)[C@H](CCCN=C(N)N)NS(=O)(=O)c2cccc(c23)C[C@@H](C)CN3	Argatroban	92722
1059	c1cccnc1N(CCC(=O)O)C(=O)c(cc2)cc(c23)nc(n3C)CNc4ccc(cc4)C(\N)=N\[H]	Dabigatran	216210
1060	c1cc(O)ccc1C[C@@H](C(=O)N[C@H](C(=O)O)CC(C)C)NC(=O)[C@H](CCC(=O)O)NC(=O)[C@H](CCC(=O)O)NC(=O)[C@H](CCC2)N2C(=O)[C@H]([C@@H](C)CC)NC(=O)[C@H](CCC(=O)O)NC(=O)[C@H](CCC(=O)O)NC(=O)[C@H](Cc3ccccc3)NC(=O)[C@H](CC(=O)O)NC(=O)CNC(=O)[C@H](CC(=O)N)NC(=O)CNC(=O)CNC(=O)CNC(=O)CNC(=O)[C@H](CCC4)N4C(=O)[C@H](CCCN\C(N)=N\[H])NC(=O)[C@H](CCC5)N5C(=O)[C@H](N)Cc6ccccc6	Bivalirudin	16129704
1061	CO[C@@H]1[C@@H](OC)[C@H](OC)[C@@H](COS([O-])(=O)=O)O[C@@H]1O[C@@H]([C@H](OC)[C@H]2OC)[C@@H](C([O-])=O)O[C@H]2O[C@H]3[C@H](OS([O-])(=O)=O)[C@@H](OS([O-])(=O)=O)[C@H](O[C@@H]3COS([O-])(=O)=O)O[C@H]4[C@H](OC)[C@@H](OC)[C@@H](O[C@H]4C([O-])=O)O[C@H]5[C@H](OS([O-])(=O)=O)[C@@H](OS([O-])(=O)=O)[C@@H](OC)O[C@@H]5COS([O-])(=O)=O.[Na+].[Na+].[Na+].[Na+].[Na+].[Na+].[Na+].[Na+].[Na+]	Idraparinux	3083444
1062	Cc1nnnn1N\C=C(C=CC2=O)\C=C2C(c3ccc(O)cc3)C4=C/C(C=CC4=O)=C/Nn5nnnc5C	TTP889	349994311
1063	c1cc(Cl)sc1C(=O)NC[C@H](OC2=O)CN2c3ccc(cc3)N4NC=NCC4	GCC-4401C	44133137
1064	OS(=O)(=O)OC[C@H]1O[C@H](OC)[C@H](NS(=O)(=O)O)[C@@H](O)[C@@H]1O[C@H](O[C@H]2C(=O)O)[C@H](OS(=O)(=O)O)[C@@H](O)[C@@H]2O[C@@H](O[C@@H]3COS(=O)(=O)O)[C@H](NS(=O)(=O)O)[C@@H](OS(=O)(=O)O)[C@@H]3O[C@@H]4O[C@H](C(=O)O)[C@H]([C@H](O)[C@H]4O)O[C@H]5O[C@H](COS(=O)(=O)O)[C@@H](O)[C@H](O)[C@H]5NS(=O)(=O)O	Fondaparinux	5282448
1065	[O-]S(=O)(=O)OC[C@H]1O[C@H](OC)[C@H](NS([O-])(=O)=O)[C@@H](O)[C@@H]1O[C@H](O[C@H]2C([O-])=O)[C@H](OS([O-])(=O)=O)[C@@H](O)[C@@H]2O[C@@H](O[C@@H]3COS([O-])(=O)=O)[C@H](NS([O-])(=O)=O)[C@@H](OS([O-])(=O)=O)[C@@H]3O[C@@H]4O[C@H](C([O-])=O)[C@H]([C@H](O)[C@H]4O)O[C@H]5O[C@H](COS([O-])(=O)=O)[C@@H](O)[C@H](O)[C@H]5NS([O-])(=O)=O.[Na+].[Na+].[Na+].[Na+].[Na+].[Na+].[Na+].[Na+].[Na+].[Na+]	Arixtra	636380
1066	c1cc(Cl)ccc1NC(=O)N2[C@H](C[C@H](C2)OC)C(=O)Nc3c(F)cc(cc3)-n4c(=O)cccc4	Eribaxaban	11634458
1067	c1cc(Cl)cc(c12)ccc(c2)S(=O)(=O)C[C@@H](O)C(=O)N3CCC(CC3)N4CCCNC4=O	Letaxaban	11641515
1068	c1ccc(C(\N)=N\[H])cc1C[C@@H](C(=O)OC)[C@@H](C)NC(=O)c2ccc(cc2)-c(cc3)cc[n+]3[O-]	Otamixaban	5496659
1069	c1cc(Cl)cnc1NC(=O)C(=O)N[C@@H](CC[C@@H](C2)C(=O)N(C)C)[C@@H]2NC(=O)c(n3)sc(c34)CN(C)CC4	Edoxaban	10280735
1070	c1cc(OC)ccc1C(=O)Nc(cccc2O)c2NC(=O)c(cc3)ccc3N4CCCN(C)CC4	Darexaban	9912771
1071	c1cc(Cl)cnc1NC(=O)c(cc(OC)cc2)c2NC(=O)c3ccc(cc3)C(=N\[H])\N(C)C	Betrixaban	10275777
1072	c1cc(OC)ccc1-n(nc2C(=O)N)c(c23)C(=O)N(CC3)c4ccc(cc4)N5CCCCC5=O	Apixaban	10182969
1073	c1cc(Cl)sc1C(=O)NC[C@H](OC2=O)CN2c3ccc(cc3)N4CCOCC4=O	Rivaroxaban	9875401
1074	C1C[C@H](O)C(C)(C)[C@H](CC2)[C@@]1(C)[C@H]3CC[C@@H]([C@]4(C)[C@]23C)[C@@H]5[C@](CC4)(C(=O)O)CC[C@H]5C(C)=C	Betulinic acid	64971
1075	CN(C)CCCSc1c(cccc1)NC(=O)/C=C/c2ccccc2	Cinanserin	5475158
1076	Oc(c1)c(O)cc(c12)oc(=O)cc2C(=O)OCC	MC8	11988319
1077	Oc(c1)c(O)c(O)cc1C(=O)O[C@H](C2)[C@H](Oc(c23)cc(O)cc3O)c(c4)c(O)c(O)c(c45)c(=O)c(O)cc(c5)[C@H]([C@H](O)C6)Oc(c67)cc(O)cc7O	TF2B	135625500
1078	Clc1c(Cl)cc(Cl)c(O)c1Cc2c(O)c(Cl)cc(Cl)c2Cl	Hexachlorophene	3598
1079	CC[Hg]Sc1c(C([O-])=O)cccc1.[Na+]	Thimerosal	16684434
1080	O=C(C)O[Hg]c1ccccc1	Phenylmercuric acetate	16682730
1081	O=C1CCCC(=C12)NC(C)=C([C@@H]2c3c([N+]([O-])=O)cccc3)C(=O)OCCc4ccccc4	MP576	2867165
1082	c1ccccc1N(CC2)C(c3c([N+]([O-])=O)cccc3)N2c4ccccc4	MP521	722085
1083	ClC1=C(Cl)C(=O)O[C@H]1CC(=O)c(c2C)sc(c23)ccc(Cl)c3	MAC-30731	2824375
1084	s1c(N)nc(c12)nc3c(n2)sc(n3)N	MAC-22272	15959288
1085	O=c1cc(C(F)(F)F)[nH]c(c12)oc(c2)C(=O)OC	MAC-13985	3452219
1086	Cc1cccc(C)c1OCC(=O)N[C@@H](Cc2ccccc2)[C@@H](O)C[C@H](Cc3ccccc3)NC(=O)[C@H](C(C)C)N4CCCNC4=O	Lopinavir	92727
1087	O=C(C)Nc(cc1)ccc1N(C(c(n2C)ccc2)C(=O)NC(C)(C)CC)C(=O)Cn3nnc(c34)cccc4	SID 24808289	24808289
1088	c1cc(Br)ccc1C(=O)N(C[C@H]([C@@H]23)CCCC3)[C@@H](C2)CN[C@H](C=O)Cc4[nH]cnc4	3A7	90478331
1089	c1ccccc1C[C@@H](C=O)NC(=O)[C@H](Cc2ccccc2)NC(=O)CCc3ccccc3	S89	72200566
1090	O=C(N)C[C@H](NC(=O)C)C(=O)N[C@@H](CO)C(=O)N[C@@H]([C@H](O)C)C(=O)N[C@@H](CO)C(=O)N[C@H](CO)CCC(=O)N	PRD_000771	72200570
1091	O=C(N)CC[C@@H](C=O)NC(=O)[C@H](CC([O-])=O)NC(=O)[C@H](Cc1ccccc1)NC(=O)[C@H](CO)NC(=O)[C@H](CC([O-])=O)NC(=O)C	PRD_001118	72200568
1092	c1ccccc1COC(=O)N[C@@H]([C@@H](C)OC(C)(C)C)C(=O)N[C@@H](CC2CCCCC2)C(=O)N[C@H](CO)C[C@@H]3CCNC3=O	NOL
1093	c1ccccc1COC(=O)N[C@@H](COC(C)(C)C)C(=O)N[C@@H](Cc2ccccc2)C(=O)N[C@@H](C[C@H]3C(=O)NCC3)CCC(=O)OCC	G85
1094	c1ccc(S(=O)(=O)O)c(c12)cccc2NCCN	Edans	92329
1095	OC(=O)c(cc1)ccc1\N=N\c(cc2)ccc2N(C)C	DABCYL	22650
1096	[H]/N=C(\N)c(c1)ccc(c12)nc([nH]2)Cc([nH]3)nc(c34)ccc(c4)C(\N)=N\[H]	BABIM	2387
1097	C1CC1C(=O)Nc2ccc(cc2)N(Cc3ccsc3)C(=O)Cn4nnc(c45)cccc5	ML300	46861530
1098	c1ncccc1[C@H](C(=O)NC(C)(C)C)N(c(cc2)ccc2C(C)(C)C)C(=O)c3occc3	ML188	46897844
1099	O=C(C1)C(O)=C(C)C(=CC2)C=1[C@](C)(CC3)C=2[C@](C)([C@@]34C)CC[C@]5(C)[C@H]4CC(C)=CC5	Iguesterin	46881919
1100	O=C(C1)[C@H](C)C[C@@H]2[C@@]1(C)CC[C@@](C)([C@]23C)C=4[C@@](C)(CC3)C=5C(=CC4)C(C)=C(O)C(=O)C5	Tingenone	101520
1101	OC(=O)[C@](C1)(C)CC[C@@](C)([C@@H]1[C@@]23C)CC[C@]2(C)C=4[C@@](C)(CC3)C=5C(=CC4)C(C)=C(O)C(=O)C5	Celastrol	122724
1102	CC(C)c(c1)c(O)cc2c1CC[C@H]([C@@]23C)C(C)(C)CCC3	Ferruginol	442027
1103	Oc1cc(O)cc(c12)oc(c(O)c2=O)-c3cc(O)c(O)cc3	Quercetin	5280343
1104	Oc1cc(O)cc(c12)oc(cc2=O)-c3cc(O)c(O)cc3	Luteolin	5280445
1105	Oc1cc(O)cc(c12)oc(cc2=O)-c3ccc(O)cc3	Apigenin	5280443
1106	c1cc(O)ccc1-c(o2)cc(=O)c(c23)c(O)cc(O)c3-c4cc(ccc4OC)-c(cc5=O)oc(c56)cc(OC)cc6O	Ginkgetin	5271805
1107	O=C1NCCC1C[C@@H](C=O)NC(=O)[C@H](CC2CCCCC2)NC(=O)[C@H](C(C)OC(C)(C)C)NC(=O)OCc3ccccc3	TG-0205221	49771527
1108	[O-][N+](=O)c(cc1)cc(Cl)c1NC(=O)c2c(O)ccc(Cl)c2	Niclosamide	4477
1109	c1c(C)onc1C(=O)N[C@@H](C(C)C)C(=O)C[C@@H](Cc2ccc(F)cc2)C(=O)N[C@@H](C[C@@H]3CCNC3=O)/C=C/C(=O)OCC	AG7088	6440352
1110	Oc(c1)c(O)c(O)cc1C(=O)O	Gallic acid	370
1111	Oc1cc(O)cc(c12)occ(c2=O)-c3ccc(O)cc3	Genistein	5280961
1112	c1cc(O)c(OC)cc1[C@@H](O2)[C@@H](CO)Oc(c23)ccc(c3)[C@H]([C@@H](O)C4=O)Oc(c45)cc(O)cc5O	Silibinin	31553
1113	c1cc(OC)ccc1S(=O)(=O)N([C@H](C(C)C)C(=O)NO)Cc2ccccc2	CGS-25966	9821883
1114	c1ccccc1SC[C@H](C(=O)NO)[C@@H](CC(C)C)C(=O)N[C@H](C(=O)NC)Cc2ccccc2	GI129471	5748217
1115	OC(=O)[C@@]1(O)C[C@H]([C@H](O)[C@H](O)C1)OC(=O)/C=C/c2cc(O)c(O)cc2	Chlorogenic acid	1794427
1116	c1cc(O)c(O)cc1C[C@H](C(=O)O)OC(=O)\C=C\c(ccc(O)c2O)c2/C=C/c3cc(O)c(O)cc3	Salvianolic acid A	5281793
1117	C1CCCC1n2c(C(=O)N(C)C)cc(c23)cnc(n3)Nc(nc4)ccc4N5CCNCC5	Ribociclib	44631912
1118	COc(c1)c(OC)c(OC)cc1Nc(ncc2F)nc2Nc(cc3)nc(c34)NC(=O)C(O4)(C)C	R406	11213558
1119	Clc(c1)cnc(c12)[nH]cc2Cc3ccc(nc3)NCc4ccc(C(F)(F)F)nc4	Pexidartinib	25151352
1120	CN(C)CCN(C)c1c(NC(=O)C=C)cc(c(c1)OC)Nc(ncc2)nc2-c3cn(C)c(c34)cccc4	Osimertinib	71496458
1121	C1CN(C)CCN1CC(=O)N(C)c2ccc(cc2)/N=C(c3ccccc3)/c4c(O)[nH]c(c45)cc(cc5)C(=O)OC	Nintedanib	135423438
1122	c1cc(C)cc(C)c1C(=O)OCc(cc2)ccc2[C@@H](CN)C(=O)Nc(c3)ccc(c34)cncc4	Netarsudil	66599893
1123	c1cccnc1COc(cc2)c(Cl)cc2Nc3c(C#N)cnc(c34)cc(OCC)c(c4)NC(=O)/C=C/CN(C)C	Neratinib	9915743
1124	c1ccccc1C(=O)N(C)[C@@H]([C@H]2OC)C[C@@H](O3)n(c4c5n6[C@]23C)c7c(cccc7)c4c8c(CNC8=O)c5c9c6cccc9	Midostaurin	9829523
1125	Fc(c1)ccc(C(=O)N(C2)C)c1[C@@H](C)Oc(c(N)nc3)cc3c(c24)c(C#N)n(n4)C	Lorlatinib	71731823
1126	Fc(c1)ccc(F)c1[C@@H](CCC2)N2c(cc3)nc(n34)c(cn4)NC(=O)N5C[C@@H](O)CC5	Larotrectinib	46188928
1127	c1cc(F)c(Cl)cc1Nc2ncnc(c23)cc(OC)c(c3)OCCCN4CCOCC4	Gefitinib	123631
1128	C1CN(C)CCN1C(CC2)CCN2c3c(OC)cc(cc3)Nc(c(C(=O)N)nc4CC)nc4NC5CCOCC5	Gilteritinib	49803313
1129	Clc(c1)cc(NS(=O)(=O)C)c(F)c1-c(nn2C(C)C)c(c2)-c3nc(ncc3)NC[C@H](C)NC(=O)OC	Encorafenib	50922675
1130	CC(C)S(=O)(=O)c1c(cccc1)Nc(c(Cl)cn2)nc2Nc(c(c3)OC(C)C)cc(C)c3C4CCNCC4	Ceritinib	57379345
1131	c1cccc(c1P(=O)(C)C)Nc(c(Cl)cn2)nc2Nc(cc3)c(OC)cc3N4CCC(CC4)N5CCN(C)CC5	Brigatinib	44205240
1132	c1cc(Br)cc(F)c1Nc(c(F)c(c23)ncn2C)c(c3)C(=O)NOCCO	Binimetinib	10288191
1133	CCS(=O)(=O)N(C1)CC1(CC#N)n2ncc(c2)-c3ncnc(c34)[nH]cc4	Baricitinib	44205240
1134	C1COCCN1C(CC2)CCN2c(c3)c(CC)cc(c34)C(=O)c5c(C4(C)C)[nH]c6c5ccc(c6)C#N	Alectinib	49806720
1135	CC#CC(=O)N1[C@@H](CCC1)c2nc(c(n23)c(N)ncc3)-c4ccc(cc4)C(=O)Nc5ncccc5	Acalabrutinib	71226662
1136	CC(C)n1c(C)nc(c12)c(F)cc(c2)-c3nc(ncc3F)Nc(nc4)ccc4CN5CCN(CC5)CC	Abemaciclib	46220502
1137	CN(C)/C(=N\[H])N=C(N)N	Metformin	4091
1138	Fc1cccc(c12)nc(n(c2=O)-c3ccccc3)[C@H](CC)Nc4ncnc(c45)nc[nH]5	Idelalisib	11625818
1139	c1cc(I)cc(F)c1Nc2n(C)c(=O)c(C)c(c23)n(c(=O)n(c3=O)C4CC4)-c5cc(NC(=O)C)ccc5	Trametinib	11707110
1140	OCCO[C@H](CC1)[C@H](OC)C[C@@H]1C[C@@H](C)[C@@H](OC(=O)[C@H]2N(C(=O)C3=O)CCCC2)CC(=O)[C@H](C)/C=C(C)/[C@@H](O)[C@@H](OC)C(=O)[C@H](C)C[C@H](C)/C=C\C=C\C=C(C)\[C@@H](OC)C[C@@H](O[C@@]34O)CC[C@H]4C	Everolimus	6442177
1141	OCC(C)(CO)C(=O)O[C@H](CC1)[C@H](OC)C[C@@H]1C[C@@H](C)[C@@H](OC(=O)[C@H]2N(C(=O)C3=O)CCCC2)CC(=O)[C@H](C)/C=C(C)/[C@@H](O)[C@@H](OC)C(=O)[C@H](C)C[C@H](C)/C=C\C=C\C=C(C)\[C@@H](OC)C[C@@H](O[C@@]34O)CC[C@H]4C	Temsirolimus	6918289
1142	C1C[C@@H](O)[C@H](OC)C[C@@H]1C[C@@H](C)[C@@H](OC(=O)[C@H]2N(C(=O)C3=O)CCCC2)CC(=O)[C@H](C)/C=C(C)/[C@@H](O)[C@@H](OC)C(=O)[C@H](C)C[C@H](C)/C=C\C=C\C=C(C)\[C@@H](OC)C[C@@H](O[C@@]34O)CC[C@H]4C	Sirolimus	5284616
1143	Cn1ncc(Cl)c1-c(c2)c(Cl)oc2C(=O)N[C@H](CN)Cc3cc(F)c(F)cc3	Uprosertib	51042438
1144	C1CC1CN2CCN(CC2)[C@@H]3CC[C@H](CC3)NC(=O)c4cc(OC)c(cc4)Nc(n5)ncc(c56)N(C)C(=O)[C@@H](CC)N6C(C)C	Volasertib	10461508
1145	O=S(=O)(C)N(C)c1nccnc1CNc2nc(ncc2C(F)(F)F)Nc3ccc(cc3)C(=O)NC	Defactinib	25117126
1146	Clc1ccc(OC)cc1Nc(nc(c23)cccc3)c(n2)NS(=O)(=O)c4cc(ccc4)NC(=O)C(N)(C)C	Pilaralisib	56599306
1147	c1nc(N)cc(C(F)(F)F)c1-c(c2)nc(N3CCOCC3)nc2N4CCOCC4	Buparlisib	16654980
1148	O[C@@H](C)C(=O)N(CC1)CCN1Cc(s2)c(C)c(c23)nc(-c4cnc(N)nc4)nc3N5CCOCC5	Apitolisib	25254071
1149	C1CC(N(C)C)CCN1C(=O)c2ccc(cc2)NC(=O)Nc(cc3)ccc3-c(n4)nc(N5CCOCC5)nc4N6CCOCC6	Gedatolisib	44516953
1150	N#CC(C)(C)c(cc1)ccc1-n2c(=O)n(C)c(c23)cnc4c3cc(cc4)-c(c5)cnc(c56)cccc6	Dactolisib	11977753
1151	N#CCC(=O)N1C[C@@H]([C@H](C)CC1)N(C)c2ncnc(c23)[nH]cc3	Tofacitinib	9926791
1152	c1cc(Cl)ccc1-c(c2)cnc(c23)[nH]cc3C(=O)c4c(F)c(ccc4F)NS(=O)(=O)CCC	Vemurafenib	42611257
1153	c1cc(Br)cc(F)c1Nc(ncn2)c(c23)cc(OC)c(c3)OCC(CC4)CCN4C	Vandetanib	3081361
1154	CN(C)S(=O)(=O)c(c1)ccc(c12)NC(=O)C/2=C\c([nH]3)cc(c34)CCCC4	su6656	5312137
1155	Fc(c1)ccc(c12)NC(=O)C\2=C/c([nH]c3C)c(C)c3C(=O)NCCN(CC)CC	Sunitinib	5329102
1156	C1CCCC1[C@@H](CC#N)n2ncc(c2)-c3ncnc(c34)[nH]cc4	Ruxolitinib	25126798
1157	OP(=O)(C)OCCCCCCCNC(=O)[C@@H](NC(=O)OCCOC)CCCCNC(=O)OCCOC	Pegaptanib	56603655
1158	O=S(=O)(N)c1c(C)ccc(c1)Nc(ncc2)nc2N(C)c(cc3)cc(c34)nn(C)c4C	Pazopanib	10113978
1159	c1nc(C)cn1-c2cc(cc(c2)C(F)(F)F)NC(=O)c3cc(c(C)cc3)Nc4nc(ccn4)-c5cccnc5	Nilotinib	644241
1160	FC(F)(F)c(cc1)ccc1/C=C/c(oc2)nc2COc(cc3)ccc3CCCCn4nncc4	Mubritinib	6444692
1161	C1CC1NC(=O)Nc2c(Cl)cc(cc2)Oc3ccnc(c34)cc(OC)c(c4)C(=O)N	Lenvatinib	9823820
1162	c1ccc(F)cc1COc(cc2)c(Cl)cc2Nc3ncnc(c34)ccc(c4)-c(cc5)oc5CNCCS(=O)(=O)C	Lapatinib	208908
1163	C1CN(C)CCN1Cc2ccc(cc2)C(=O)Nc3cc(c(C)cc3)Nc4nc(ccn4)-c5cccnc5	Imatinib	5291
1164	C=CC(=O)N1C[C@@H](CCC1)n2nc(c(c23)c(N)ncn3)-c4ccc(cc4)Oc5ccccc5	Ibrutinib	24821094
1165	OP(=O)(O)OCN1C(=O)C(C)(C)Oc(c12)ccc(n2)Nc3nc(ncc3F)Nc4cc(OC)c(OC)c(c4)OC	Fostamatinib	11671467
1166	COCCOc(c1)c(OCCOC)cc(c12)ncnc2Nc3cc(C#C)ccc3	Erlotinib	176870
1167	COc(c1)cc(OC)cc1N(CCNC(C)C)c(c2)ccc(c23)ncc(n3)-c(c4)cnn4C	Erdafitinib	67462786
1168	Fc(c1)cc(F)cc1Cc(c2)ccc(c23)[nH]nc3NC(=O)c(cc4)c(NC5CCOCC5)cc4N6CCN(C)CC6	Entrectinib	25141092
1169	Clc1cccc(C)c1NC(=O)c(cn2)sc2Nc(c3)nc(C)nc3N(CC4)CCN4CCO	Dasatinib	3062316
1170	c1cc(F)c(Cl)cc1Nc2ncnc(c23)cc(OC)c(c3)NC(=O)\C=C\CN4CCCCC4	Dacomitinib	11511120
1171	c1cc(F)ccc1NC(=O)C2(CC2)C(=O)Nc3ccc(cc3)Oc4ccnc(c45)cc(OC)c(c5)OC	Cabozantinib	25102847
1172	Clc1ccc(F)c(Cl)c1[C@@H](C)Oc(c(N)nc2)cc2-c(c3)cnn3C4CCNCC4	Crizotinib	11626560
1173	c1cc(I)cc(F)c1Nc(c(F)c(F)cc2)c2C(=O)N(C3)CC3(O)[C@H]4NCCCC4	Cobimetinib	16222096
1174	Clc1cc(Cl)c(OC)cc1Nc2c(C#N)cnc(c23)cc(c(c3)OC)OCCCN4CCN(C)CC4	Bosutinib	5328940
1175	c1cccc(C(=O)NC)c1Sc(cc2)cc(c23)[nH]nc3/C=C/c4ncccc4	Axitinib	6450551
1176	c1cc(F)c(Cl)cc1Nc2ncnc(c23)cc(O[C@H]4CCOC4)c(c3)NC(=O)/C=C/CN(C)C	Afatinib	10184653
1177	c1ccc(C(O)(C)C)nc1-n2n(CC=C)c(=O)c(c23)cnc(n3)Nc(cc4)ccc4N5CCN(C)CC5	Adavosertib	24856436
1178	CO[C@@H]1[C@H](NC)C[C@@H](O2)n(c3c4n5[C@]12C)c6c(cccc6)c3c7c(CNC7=O)c4c8c5cccc8	Staurosporin	44259
1179	C1CCCC1n2c(=O)c(C(=O)C)c(C)c(c23)cnc(n3)Nc(nc4)ccc4N5CCNCC5	Palbociclib	5330286
1180	c1cccc(NC(=O)C2)c1c(c23)[nH]c4c3cccc4	Paullone	369401
1181	OC(=O)c(cc1)c(Cl)cc1Nc(nc(n2)N[C@H](C(C)C)CO)c(c23)ncn3C(C)C	Purvalanol	448991
1182	OC[C@@H](CC)Nc(n1)nc(c(c12)ncn2C(C)C)NCc3ccccc3	Roscovitine	160355
1183	n1cn(C)c(c12)nc(NCCO)nc2NCc3ccccc3	Olomucine	4592
1184	c1cccc(Cl)c1-c(o2)cc(=O)c(c23)c(O)cc(O)c3[C@@H](CC4)[C@H](O)CN4C	Alvocidib	5287969
1185	c1cc(Br)ccc1\C=C\CNCCNS(=O)(=O)c2cccc(c23)cncc3	H-89	449241
1186	n1cnc(N)c(c12)ncn2[C@@H]([C@@H]3O)O[C@@H]([C@H]3O)C(=O)NCCCCCC(=O)N[C@@H](C(=O)N)CCCN=C(N)N	ARC-1032	25190766
1187	n1cnc(N)c(c12)ncn2[C@@H]([C@@H]3O)O[C@@H]([C@H]3O)C(=O)NCCCCCC(=O)N[C@H](CCCN=C(N)N)C(=O)N[C@@H](C(=O)N)CCCN=C(N)N	ARC-1034	25141061
1188	n1cnc(N)c(c12)ncn2[C@@H]([C@@H]3O)O[C@@H]([C@H]3O)C(=O)NCCCCCC(=O)N[C@H](CCCN=C(N)N)C(=O)N[C@H](CCCN=C(N)N)C(=O)N[C@H](CCCN=C(N)N)C(=O)N[C@H](CCCN=C(N)N)C(=O)N[C@H](CCCN=C(N)N)C(=O)N[C@@H](C(=O)N)CCCN=C(N)N	ARC-902	25190790
1189	n1cnc(N)c(c12)ncn2[C@@H]([C@@H]3O)O[C@@H]([C@H]3O)C(=O)NCCCCCC(=O)N[C@H](CCCCN)C(=O)NCCCCCC(=O)N[C@H](CCCN=C(N)N)C(=O)N[C@@H](C(=O)N)CCCN=C(N)N	ARC-1012	25190767
1190	n1cnc(N)c(c12)ncn2[C@@H]([C@@H]3O)O[C@@H]([C@H]3O)C(=O)NCCCCCC(=O)N[C@H](C)C(=O)NCCCCCC(=O)N[C@H](CCCN=C(N)N)C(=O)N[C@@H](C(=O)N)CCCN=C(N)N	ARC-1039	25190770
1191	O=C1NCCC1C[C@@H](C(O)S(=O)(=O)O)NC(=O)[C@H](CC(C)C)NC(=O)OCc2ccccc2	GC376	71481120
1192	OC(=O)C[C@H](O)C(=O)N[C@@H](CC(C)C)C(=O)NCCCC[NH+]=C(N)N	Q27095093	5288145
1193	CC(C)=CCC[C@@](C)(C=C1)Oc(c12)cc(O)c3c2O[C@@H](CC3=O)c4ccc(O)cc4	Cycloaltilisin 7	11811595
1194	c1cc(O)cc(O)c1C(=O)CCc(c(c(O)c2O)C/C=C(C)/CCC=C(C)C)cc2-c(c3CCC(=O)c4c(O)cc(O)cc4)cc(O)c(O)c3C/C=C(C)/CCC=C(C)C	Cycloaltilisin 6	10190977
1195	[H]/N=C(N)/N1C(O)[C@H](CCC1)NC(=O)[C@H](C(C)C)NC(=O)[C@H](CO)NC(=O)NCCCCN=C(N)N	Lichostatinal	132937452
1196	CC(C)=CCC/C(C)=C/Cc(c(O)c(O)cc1)c1CCC(=O)c2c(O)cc(O)cc2	AC-5-1	6449829
1197	c1ccccc1C[C@H](C(=O)N2[C@@H](CCC2)C(=O)OC)N(C)C(=O)CNC(=O)[C@H]([C@@H](C)CC)NC(=O)C[C@H](O)[C@H](CC(C)C)NC(=O)[C@H](CCC(=O)N)N(C)C(=O)[C@H](CC(C)C)NC(=O)[C@H](O)[C@@H](C)CC	Grassystatin C	44253975
1198	c1ccccc1C[C@H](C(=O)N2[C@@H](CCC2)C(=O)OC)N(C)C(=O)[C@H](CC)NC(=O)[C@H]([C@H](O)C)NC(=O)C[C@H](O)[C@H](CC(C)C)NC(=O)[C@H](CC(=O)N)NC(=O)[C@H](CC(C)C)NC(=O)[C@@H](C(C)C)OC(=O)[C@H](C(C)C)OC(=O)[C@@H](N(C)C)C(C)C	Grassystatin B	44253976
1199	c1ccccc1C[C@H](C(=O)N2[C@@H](CCC2)C(=O)OC)N(C)C(=O)[C@H](C)NC(=O)[C@H]([C@H](O)C)NC(=O)C[C@H](O)[C@H](CC(C)C)NC(=O)[C@H](CC(=O)N)NC(=O)[C@H](CC(C)C)NC(=O)[C@@H](C(C)C)OC(=O)[C@H](C(C)C)OC(=O)[C@@H](N(C)C)C(C)C	Grassystatin A	44255320
1200	C1C[C@@H](O)C(C)(C)[C@H](C[C@@H]2O)[C@@]1(C)[C@H]([C@@H]2[C@@]34C)C(=O)C[C@]3(C)[C@H](CC4)[C@H](C)CC/C(C)=C/C	Schinol	101285951
1201	C1C[C@H](O)C(C)(C)[C@H](CC2)[C@@]1(C)[C@H]([C@@]23C)CC=C4[C@@]3(C)CC[C@]5(C(=O)O)[C@H]4[C@@H](C)[C@H](C)CC5	β-ursolic acid	64945
1202	c1ccccc1C(=O)C(C(=O)[C@@]23CC=C(C)C)=C(O)[C@H](C2=O)C(C)(C)[C@H](C3)CC=C(C)C	garciniaphenone	103595757
1203	CC(C)=CC[C@]12C(C)(C)[C@@H](CC=C(C)C)C[C@@](C1=O)(CC=C(C)C)C(=O)C(\C2=O)=C(\O)c3ccccc3	7-epiclusianone	5471610
1204	CC(C)=CC[C@]12[C@](C)(CCC=C(C)C)[C@@H](CC=C(C)C)C[C@@](C1=O)(CC=C(C)C)C(=O)C(\C2=O)=C(/O)c3cc(O)c(O)cc3	Guttiferone A	5352090
1205	Oc1cc(OC)cc(O)c1C(=O)[C@@H]([C@@H]2c3ccccc3)CC=C(C2)CCC=C(C)C	Nicolaioidesin C	73076249
1206	Oc1cc(OC)cc(O)c1C(=O)[C@@H]2[C@H](CC=C(C)C)C(C)=CC[C@H]2c3ccccc3	Panduratin A	6483648
1207	c1ccccc1C[C@@H](N(C)C(=O)[C@@H](N23)CCC2)C4=N[C@@H](CS4)C(=O)N[C@H](CC)C5=N[C@@H](CS5)C(=O)N(C)[C@H](CC(C)C)C(=O)N[C@H]([C@H](O)C)C(=O)N[C@H](C)[C@@H](C)C(=O)O[C@H](C(=O)N(C)[C@H](C3=O)C(C)C)Cc6ccccc6	Grassypeptolide A	24809132
1208	CC[C@H](C)[C@H](N(C)C)C(=O)O[C@@H](CC(C)C)C(=O)N[C@@H](CC(C)C)C(=O)N[C@@H](C)/C=C/C(=O)N1[C@@H](C)C(OC)=CC1=O	GALLINAMIDE A	25209862
1209	c1cc(O)ccc1C(=O)N[C@@H](C(C)C)C(=O)N[C@@H](C(C)C)C(=O)N[C@H](C=O)CCCN=C(N)N	TOKARAMIDE A	10457697
1210	c1cc(O)ccc1CCNC(=O)[C@H]2O[C@@H]2C(=O)N[C@@H](Cc3ccccc3)C(=O)NCc4ccccc4	CAA0225	50909779
1211	CCOC(=O)[C@H]1O[C@@H]1C(=O)N[C@@H]([C@@H](C)CC)C(=O)N2[C@H](C(=O)O)CCC2	CA-030	131790
1212	c1ccccc1C[C@@H](C(=O)O)NC(=O)N[C@@H](CCCN=C(N)N)C(=O)N[C@@H](C(C)C)C(=O)N[C@H](C=O)Cc2ccccc2	alpha-Mapi	72355
1213	c1ccccc1CC(C=O)N([C@H](C(=O)N)[C@@H](C)CC)C(=O)[C@H](C2NC(N)=NCC2)NC(=O)NC(C(=O)O)Cc3ccccc3	Chymostatin C	101533070
1214	c1ccccc1CC(C(=O)O)NC(=O)NC(C2NC(N)=NCC2)C(=O)NC(CC(C)C)C(=O)NC(C=O)Cc3ccccc3	Chymostatin B	103535
1215	c1ccccc1CC(C=O)N([C@H](C(=O)N)CC(C)C)C(=O)[C@@H](C2NC(N)=NCC2)NC(=O)NC(C(=O)O)Cc3ccccc3	Chymostatin a	101533068
1216	NC(N)=NCCC[C@@H](C=O)NC(=O)[C@H](C(C)C)NC(=O)[C@H](CCCN=C(N)N)NC(=O)N[C@H](C(=O)O)Cc1ccccc1	Antipain	37817
1217	O=C(C)N[C@@H](CC(C)C)C(=O)N[C@@H](CC(C)C)C(=O)N[C@H](C=O)CCCN=C(N)N	Leupeptin	72429
1218	c1ccnc(c12)c(O)ccc2[N+]([O-])=O	Nitroxoline	19910
1219	O=C1SCC(=O)N1CCNC(=O)COC(=O)CNC(=O)c2occc2	SMR000064326	2078629
1220	CCCNC(=O)[C@H]1O[C@@H]1C(=O)N[C@@H]([C@@H](C)CC)C(=O)N2[C@@H](CCC2)C(=O)OC	CA-074Me	6610318
1221	c1cc(O)ccc1CC(NC(=O)CC(C)C)C(=O)NC(C(C)C)C(=O)NC(C=O)Cc2ccccc2	YM-51084	274390674
1222	c1cc(F)ccc1[C@@H](C(F)(F)F)N[C@@H](CS(=O)(=O)CC2CC2)C(=O)N[C@@H](CC)C(=O)C(=O)NC3CC3	VBY-825	70945511
1223	c1ccccc1S(=O)(=O)\C=C\[C@H](CCc2ccccc2)NC(=O)[C@H](Cc3ccccc3)NC(=O)N4CCN(C)CC4	K-11777	9851116
1224	c1ccccc1CNC(=O)[C@H]2O[C@@H]2C(=O)N[C@@H]([C@@H](C)CC)C(=O)N3[C@@H](CCC3)C(=O)OCc4ccccc4	CA077	23647362
1225	c1ccoc1C(=O)O	2-Furoic acid	6919
1226	O=S(=O)(C)c(cc1)ccc1-c(cc2)ccc2[C@@H](C(F)(F)F)N[C@@H](CC(F)(C)C)C(=O)NC3(C#N)CC3	Odanacatib	10152654
1227	N#CCNC(=O)C1(CCCCC1)NC(=O)c(cc2)ccc2N(CC3)CCN3CCC	Balicatib	10201696
1228	OC(=O)C[C@H](O)[C@H](CC(C)C)NC(=O)[C@H](C)NC(=O)C[C@H](O)[C@H](CC(C)C)NC(=O)[C@H](C(C)C)NC(=O)[C@H](C(C)C)NC(=O)CC(C)C	Pepstatin	5478883
1229	[O-][N+](=O)c(cc1)ccc1/C=C(\C2)C(=O)C(\CN2C(=O)C=C)=C\c3ccc([N+]([O-])=O)cc3	b-AP15	5351435
1230	CCCNC(=O)[C@H]1O[C@@H]1C(=O)N[C@@H]([C@@H](C)CC)C(=O)N2[C@H](C(=O)O)CCC2	CA-074	9821383
1231	OC(=O)[C@H]1O[C@@H]1C(=O)N[C@@H](CC(C)C)C(=O)NCCCCN=C(N)N	E 64	123985
1232	CCN(CC)C(=S)SSC(=S)N(CC)CC	Antabuse	3117
1233	Clc1ccc(cc1)Oc2ccc(cc2)S(=O)(=O)CC3(C(=O)NO)CCOCC3	CTS1027	DB08490
1234	OC(=O)CC[C@@H](C(=O)N)NC(=O)[C@H](CCC(=O)O)NC(=O)[C@@H](CP(=O)(O)c1ccc(Br)cc1)Cc2onc(c2)-c3ccc(cc3)-c4cc(Cl)ccc4	RXP470.1	44580458
1235	OP(=O)(O)C(O)(P(=O)(O)O)CCCN	Alendronate	2088
1236	CCC(C)(C)C(=O)O[C@H]1C[C@@H](C)C=C([C@H]12)C=C[C@H](C)[C@@H]2CC[C@H]3OC(=O)C[C@H](O)C3	Simvastatin	54454
1237	COCCN(CC1)CCC1(C(=O)NO)S(=O)(=O)N2CCC(CC2)Oc3ccc(OC(F)(F)F)cc3	SD-7300	9893042
1238	C1S[C@@H]1CS(=O)(=O)c2ccc(cc2)Oc3ccc(cc3)CN	(R)-ND-336	129522092
1239	OC1=C(C(=O)N)C(=O)[C@@H](N(C)C)[C@@H]([C@@]12O)C[C@H]3C(C2=O)=C(O)c4c(C3)c(N(C)C)ccc4O	Minocycline	54675783
1240	c1cc(Cl)c(Cl)cc1C(=O)N[C@@H](C)CCC	NSC405020	346721
1241	O=C(C)Nc(nc1C)sc1-c2nc(sc2)Nc3c(OC)cccc3	JNJ0966	1117189
1242	[O-][N+](=O)c1c(F)c(Br)ccc1OC	GS-5745	56776542
1243	s1cccc1SC[C@@H](C)[C@H](CC(C)C)C(=O)N[C@@H](C(=O)NC)Cc2ccccc2	Neovastat
1244	c1cc(Cl)cnc1OC(CC2)CCN2S(=O)(=O)C[C@@]3(C)NC(=O)NC3=O	AZD-1236	24751752
1245	c1cc(C)ccc1C#Cc(cc2)sc2S(=O)(=O)N[C@@H](C(=O)O)Cc3c[nH]c(c34)cccc4	S-3304	10718956
1246	OC1=C(C(=O)N)C(=O)[C@@H](N(C)C)[C@@H]([C@@]12O)[C@@H](O)[C@H]3C(C2=O)=C(O)c4c([C@@H]3C)cccc4O	Doxycycline	54671203
1247	OC1=C(C(=O)N)C(=O)C[C@@H]([C@@]12O)C[C@H]3C(C2=O)=C(O)c4c(C3)cccc4O	Metastat	54678924
1248	c1cc(Cl)ccc1-c(cc2)ccc2C(=O)C[C@@H](C(=O)O)CSc3ccccc3	Tanomastat	6918336
1249	ON1CCCC[C@@H](C1=O)NC(=O)C[C@H](O)C	Cobactin T	101443164
1250	Brc(c1)c(Br)[nH]c1-c2nccc(c23)[nH]c(n3)N	Ageladine A	10089677
1251	c1cc(O)cc(c12)O[C@H](CC2=O)c3cc(CC=C(C)C)c(O)c(c3)CC=C(C)C	Abyssinone IV	4063835
1252	O1C(C)(C)C=Cc(c12)cc(cc2CC=C(C)C)[C@@H](CC3=O)Oc(c34)cc(O)cc4	Abyssinone III	42607817
1253	c1cc(O)cc(c12)O[C@@H](CC2=O)c3cc(c(O)cc3)CC=C(C)C	Abyssinone II	10064832
1254	C1=CC(C)(C)Oc(c12)ccc(c2)[C@H](CC3=O)Oc(c34)cc(O)cc4	Abyssinone I	442152
1255	C1S[C@@H]1CS(=O)(=O)c2ccc(cc2)Oc3ccccc3	SB-3CT	9883002
1256	c1cc(OC)c(OC)cc1\C=C\C(=O)N2[C@H](C(=O)NO)C[C@@H](C2)NC(=O)c3cccnc3	ly52	44593458
1257	c1ccsc1SC[C@H](C(=O)NO)[C@@H](CC(C)C)C(=O)N[C@H](C(=O)NC)Cc2ccccc2	Batimastat	5362422
1258	c1cc(OC)ccc1S(=O)(=O)N([C@H](C(C)C)C(=O)NO)Cc2cccnc2	CGS-27023A	446504
1259	ONC(=O)C[C@@H](CC(C)C)C(=O)N[C@H](C(=O)NC)Cc1c[nH]c(c12)cccc2	Ilomastat	132519
1260	C1CCCCN1C(=O)[C@H](CC2CCCC2)[C@H](C(=O)NO)CN(C3=O)C(=O)N(C)C3(C)C	Cipemastat	193987
1261	CC1(C)SCCN([C@H]1C(=O)NO)S(=O)(=O)c2ccc(cc2)Oc3ccncc3	Prinomastat	466151
1262	CC1(C)N(C)C(=O)N(C1=O)CC[C@H](S)C(=O)N[C@@H](CC(C)C)C(=O)N[C@@H](C(C)(C)C)C(=O)NC	Rebimastat	9913881
1263	ONC(=O)[C@@H](CC=C)[C@@H](CC(C)C)C(=O)N[C@H](C(=O)NC)Cc1ccccc1	BB-1101	9908389
1264	ONC(=O)[C@@H](O)[C@@H](CC(C)C)C(=O)N[C@@H](C(C)(C)C)C(=O)NC	Marimastat	119031
1265	c1cc(Br)ccc1Cn2c(ncc2)CCc3c(C(=O)OC)c(O)cc(O)c3Cl	7KY	127049159
1266	Clc1c(O)cc(O)c(Cl)c1CCc(ncc2)n2Cc3ccccc3	EQD	132992920
1267	CCCNC(=O)[C@H]([C@H]1O)O[C@H]([C@@H]1O)n2cnc(c23)c(N)ncn3	BRN 0582860	3044933
1268	Clc1c(O)cc(O)c(C(=O)OC)c1CCc(ncc2)n2Cc3oc(Cl)cc3	6C0	118988437
1269	c1cc(C)cc(C)c1Sc(n2)[nH]c(c23)c(=N\[H])\ncn3CCCC#C	pu-h54	136236968
1270	Clc(n1)nc(N)c(c12)ncn2[C@@H]3O[C@@H](CC3)CO	2-chlorodideoxyadenosine	72194
1271	Clc1c(O)cc(O)c(C(=O)O[C@@H](C2)C)c1CC(=O)\C=C\C=C\[C@@H](O3)[C@@H]23	radicicol	6323491
1272	OCCNC(=O)[C@H]([C@H]1O)O[C@H]([C@@H]1O)n2cnc(c23)c(N)ncn3	BRN 0631319	215492
1273	COC(=O)c1c(O)cc(O)c(C(=O)OC)c1CCc(ncc2)n2Cc3ccccc3	D57	132992912
1274	Clc1c(O)cc(O)c(C(=O)OC)c1CCc(ncc2)n2Cc3ccccc3	BnIm	60165612
1275	Clc1c(O)cc(O)c(C(=O)OC)c1CCc(ncc2)n2Cc3ccccc3	V2C	381342408
1276	Clc1c(O)cc(O)c(C(=O)OC)c1CCc2c(nccc2)Cc3ccccc3	VC-4	132992911
1277	Clc1c(O)cc(O)c(C(=O)OC)c1CCc2c(cccc2)Cc3ccc(F)cc3	VC-1	131704472
1278	Clc1c(O)cc(O)c(C(=O)OC)c1CCc2c(cccc2)Cc3ccccc3	VC-5	131704473
1279	c1c[nH]c(c12)nccc2-c(nc3C4([S@@](=O)(=N)C)CC4)nc(c3)N5[C@H](C)COCC5	AZD6738	54761306
1280	c1c[nH]c(c12)cccc2-c(nc3C4(S(=O)(=O)C)CC4)nc(c3)N5[C@H](C)COCC5	AZ20	46244454
1281	CC(C)S(=O)(=O)c1ccc(cc1)-c2nc(c(N)nc2)-c3onc(c3)-c4ccc(cc4)CNC	Berzosertib	59472121
1282	O=S(=O)(C)c1ccc(cc1)-c2nc(c(N)nc2)C(=O)Nc3ccccc3	VE-821	51000408
1283	N#CC(C)(C)c(cc1)ccc1N2C(=O)OCc3cnc(c4c23)ccc(c4)-c(c5)cnc(c56)cccc6	ETP-46464	72199292
1284	c1ccc(C(F)(F)F)cc1-n2c(=O)ccc3cnc(c4c23)ccc(c4)-c5ccc(N)nc5	Torin 2	51358113
1286	C1CCCCC1COc2nc(N)nc(N)c2N=O	NU6027	398148
1287	O1COc(c2)c1c(OC)c(c23)c4c(C[C@@H](C)[C@@H](C3)C)cc(OC)c(OC)c4OC	Schisandrin B	108130
1288	CN(C)CC(C)(C)COc(c1)ccc(c12)[nH]c(c2)-c3cc(c[nH]c3=O)NC(=O)c(c4)cnn4Cc5ccccc5	V158411	44198296
1289	c1ccc(Cl)c(c12)cnc(c2)Nc(cnc3C#N)nc3O[C@H](C)CN(C)C	SAR-020106	44203948
1290	c1ccccc1-c(c(c2c34)C(=O)NC2=O)cc3[nH]c5c4cc(O)cc5	PD-407824	4369491
1291	Clc1cccc(Cl)c1-c(c2c3C(=O)NC2=O)cc(c34)n(CCCNC)c5c4cc(O)cc5	PD-321852	11612456
1292	C1CCCCN1Cc2ccc(cc2)-c(c3)cnc4[nH]c(c5c34)cnc(c5)C#N	GNE-900	44545757
1293	C1CN(C)CCN1c2ccc(cc2)-c(c3)cnc4[nH]c(c5c34)cnc(c5)C#N	GNE-783	44545901
1294	Clc(c1)ccc(c12)[nH]c(=O)c(c2N[C@H](CN34)C(CC4)CC3)-c([nH]5)nc(c56)cccc6	CHIR-124	135399748
1295	CN(C)C[C@@H](C)Oc1nc(cnc1C#N)Nc(nc2)cc(OC)c2-c(c3)cnn3C	CCT244747	54758482
1296	c1ccccc1C(=O)c(cc2)ccc2C[C@@H](N)C(=O)N[C@H](CO)C(=O)N[C@H](Cc3c[nH]c(c34)cccc4)C(=O)N[C@H](CO)C(=O)N[C@H](Cc5c(F)c(F)c(F)c(F)c5F)C(=O)N[C@H](CC6CCCCC6)C(=O)N[C@H](CCCN\C(N)=N\[H])C(=O)N[C@H](CCCN\C(N)=N\[H])C(=O)N[C@H](CCCN\C(N)=N\[H])C(=O)N[C@H](CCC(=O)N)C(=O)N[C@H](CCCN\C(N)=N\[H])C(=O)N[C@@H](C(=O)O)CCCN\C(N)=N\[H]	CBP-501	16156006
1297	CO[C@@H]1[C@H](NC)C[C@@H](O2)n(c3c4n5[C@]12C)c6c(cccc6)c3c7c([C@@H](O)NC7=O)c4c8c5cccc8	UCN-01	72271
1298	C1CC2OC1n(c3c4n25)c6c(cccc6)c3c7c(C(=O)NC7=O)c4c8c5cccc8	SB 218078	3387354
1299	C1NCCC[C@H]1Oc2nc(cnc2)Nc(c3)n[nH]c3-c4c(OC)nc(C)cc4	LY2880070	56968075
1300	NCCCOc1c(cccc1)NC(=O)Nc2nccnc2	XL-844	10016910
1301	C1CC[C@@H](N)CN1c2c(Br)cnc(c23)[nH]cc3NC(=O)C4CC4	GDC-0575	46917793
1302	C1NCCOC1CNc(c2C(F)(F)F)cc(nc2)Nc3ncc(C#N)nc3	SRA737	72165232
1303	C1CCCCC1[C@@H](N)C(=O)Nc(c2)cc3c(=O)[nH]ncc4c([nH]c2c34)-c(c5)cnn5C	PF-477736	135565545
1304	C1NCCC[C@H]1c(c(Br)c2N)nc(n23)c(cn3)-c(c4)cnn4C	MK-8776	16224745
1305	c1nc(C)cnc1NC(=O)Nc(cc(Br)c(c2)C)c2OC[C@H]3OCCNC3	Rabusertib	11955855
1306	COc1cccc(OCCCN)c1-c2[nH]nc(c2)Nc3ncc(C#N)nc3	Prexasertib	46700756
1307	CCN1CCC(CC1)Oc2c(C#N)ncc(c23)[nH]c4c3cccn4	GDC-0425	58266779
1308	c1ccc(F)cc1-c(cc2NC(=O)N)sc2C(=O)N[C@H]3CCCNC3	AZD7762	11152667
